# Supplementary material for: Concerted modification of nucleotides at functional centers of the ribosome revealed by single-molecule RNA modification profiling
Source: eLife. 2022 Apr 6;11:e76562. doi: 10.7554/eLife.76562 (PMC9045821; doi:10.7554/eLife.76562)
Supplement: Supplementary file 1. — (A) Spearman correlations between reference positions along with corresponding p-value, Benjamini-Hochberg corrected p-values, correlation comparison Fisher z-transform test, Benjamini-Hochberg corrected correlation comparison Fisher z-transform test p-values with wild type repeats and IVT. (B) Fraction modified by position for every experiment with associated wild type- to-experiment two sample chi squared test p-values and Benjamini-Hochberg corrected p-values. (C) Fraction modified by position, average fraction modified and standard deviation of the three replicates for wild type yeast rRNA. (D) Yeast strains used in this study. (E) Oligonucleotides used in this study. (F) Sequencing metrics for S. cerevisiae rRNA using direct RNA nanopore sequencing. (G) Experiment mapping between ENA, SRA, GEO IDs. [file elife-76562-supp1.xlsx]

## Sheet: A
Supplementary file 1A. Spearman correlations between reference positions along with corresponding pvalue, Benjamini-Hochberg corrected p-values, correlation comparison Fisher z-transform test, Benjamini-Hochberg corrected correlation comparison Fisher z-transform test p-values with wild type repeats and IVT.
ref_index1	ref_index2	contig	CBF5GAL_corr	CBF5GAL_pvalue	CBF5GAL_corrected_pvalue	CBF5GAL_WT_YPD_comparison_pvalue	CBF5GAL_IVT_comparison_pvalue	CBF5GAL_WT_YPD2_comparison_pvalue	CBF5GAL_WT_YPD3_comparison_pvalue	CBF5GAL_corrected_WT_YPD_comparison_pvalue	CBF5GAL_corrected_IVT_comparison_pvalue	CBF5GAL_corrected_WT_YPD2_comparison_pvalue	CBF5GAL_corrected_WT_YPD3_comparison_pvalue	CBF5GLU_corr	CBF5GLU_pvalue	CBF5GLU_corrected_pvalue	CBF5GLU_WT_YPD_comparison_pvalue	CBF5GLU_IVT_comparison_pvalue	CBF5GLU_WT_YPD2_comparison_pvalue	CBF5GLU_WT_YPD3_comparison_pvalue	CBF5GLU_corrected_WT_YPD_comparison_pvalue	CBF5GLU_corrected_IVT_comparison_pvalue	CBF5GLU_corrected_WT_YPD2_comparison_pvalue	CBF5GLU_corrected_WT_YPD3_comparison_pvalue	NOP58GAL_corr	NOP58GAL_pvalue	NOP58GAL_corrected_pvalue	NOP58GAL_WT_YPD_comparison_pvalue	NOP58GAL_IVT_comparison_pvalue	NOP58GAL_WT_YPD2_comparison_pvalue	NOP58GAL_WT_YPD3_comparison_pvalue	NOP58GAL_corrected_WT_YPD_comparison_pvalue	NOP58GAL_corrected_IVT_comparison_pvalue	NOP58GAL_corrected_WT_YPD2_comparison_pvalue	NOP58GAL_corrected_WT_YPD3_comparison_pvalue	NOP58GLU_corr	NOP58GLU_pvalue	NOP58GLU_corrected_pvalue	NOP58GLU_WT_YPD_comparison_pvalue	NOP58GLU_IVT_comparison_pvalue	NOP58GLU_WT_YPD2_comparison_pvalue	NOP58GLU_WT_YPD3_comparison_pvalue	NOP58GLU_corrected_WT_YPD_comparison_pvalue	NOP58GLU_corrected_IVT_comparison_pvalue	NOP58GLU_corrected_WT_YPD2_comparison_pvalue	NOP58GLU_corrected_WT_YPD3_comparison_pvalue	IVT_corr	IVT_pvalue	IVT_corrected_pvalue
645	649	RDN25-1	0.49525	4.38205e-08	1.11034e-05	0.000227648	1.49933e-07	0.000481208	0.000141014	0.039884	5.62892e-05	0.0743891	0.0285065	0.25629	3.03748e-09	2.32685e-07	0.0555527	2.67651e-06	0.128606	0.0300045	0.397575	0.000334946	0.533001	0.2654	0.489938	1.46297e-12	3.44215e-10	3.93347e-06	9.73836e-11	9.93511e-06	1.32499e-06	0.00258429	5.11848e-08	0.00569309	0.000870518	0.039906	0.223059	0.464741	0.00742174	0.222892	0.000225524	0.00295079	0.0407189	0.481585	0.00160617	0.0161745	-0.0248685	0.532925	0.825186
645	650	RDN25-1	0.124546	0.196934	0.716797	0.550771	0.569657	0.785521	0.440287	0.99193	0.938007	0.997721	0.9646	-0.00604806	0.890567	0.971339	0.198882	0.253765	0.038072	0.284415	0.645354	0.661897	0.299561	0.732037	0.0765928	0.300091	0.708248	0.867009	0.880642	0.794106	0.701822	0.990136	0.978574	0.965422	0.932143	-0.0728149	0.0260612	0.0914222	0.0022527	0.0101477	1.7771e-05	0.00208105	0.0144745	0.0531238	0.000160462	0.0118634	0.0636427	0.110235	0.422227
645	663	RDN25-1	-0.193216	0.044116	0.429935	0.0120063	0.0128828	0.00997438	0.0341742	0.384786	0.376948	0.416074	0.660367	0.0448852	0.306974	0.656606	0.696413	0.643701	0.649695	0.612598	0.931905	0.907049	0.914854	0.892797	-0.0788432	0.286073	0.695937	0.075961	0.0790775	0.0639733	0.208364	0.680244	0.564716	0.655475	0.815135	-0.0674693	0.039251	0.128407	0.00271948	0.00810266	0.000662941	0.0241323	0.0171386	0.0442698	0.00424929	0.0945153	0.0730644	0.0666289	0.319935
645	776	RDN25-1	0.206109	0.0315414	0.375155	0.0422962	0.0559152	0.0809608	0.0477096	0.682845	0.647928	0.861397	0.727543	-0.0166926	0.704124	0.898409	0.789758	0.754445	0.340779	0.623099	0.954268	0.93594	0.766345	0.896772	0.0312311	0.673016	0.891616	0.680805	0.739573	0.995724	0.762742	0.960787	0.937125	0.999972	0.948645	0.0465753	0.154947	0.365358	0.271515	0.405977	0.690753	0.313715	0.567206	0.674336	0.862375	0.586654	0.0024297	0.951429	0.982405
645	805	RDN25-1	0.0311791	0.747571	0.945442	0.866422	0.792562	0.721734	0.852868	0.995385	0.984347	0.997721	0.995705	-0.021532	0.624218	0.870154	0.512817	0.691123	0.74319	0.491535	0.867048	0.920549	0.945874	0.852011	-0.1137	0.123317	0.496101	0.117379	0.177225	0.168362	0.107988	0.760271	0.703226	0.779823	0.727639	-0.0158545	0.628445	0.842516	0.507205	0.726254	0.788263	0.46841	0.774512	0.878355	0.912579	0.708837	0.00275774	0.944881	0.979678
645	807	RDN25-1	0.0413539	0.669414	0.936421	0.388025	0.975023	0.567674	0.48658	0.975792	0.997597	0.98872	0.968555	-0.0152329	0.728931	0.908819	0.536204	0.383993	0.971655	0.772243	0.875245	0.777454	0.991557	0.944054	0.107909	0.143728	0.53468	0.0547681	0.417054	0.1132	0.0799508	0.646776	0.834248	0.729436	0.681691	0.00889098	0.786112	0.91727	0.197323	0.584113	0.514134	0.323236	0.469404	0.799099	0.753883	0.59649	0.0379744	0.340915	0.709241
645	817	RDN25-1	0.0297357	0.75889	0.950127	0.709517	0.538527	0.605379	0.734488	0.995385	0.931958	0.995892	0.985471	-0.0318654	0.468404	0.788784	0.6713	0.93649	0.859387	0.581948	0.922204	0.987202	0.966143	0.886071	0.170848	0.0200639	0.184096	0.0261673	0.015748	0.0134476	0.0242442	0.541726	0.325872	0.387071	0.494333	-0.0261031	0.425558	0.686479	0.701559	0.84139	0.938389	0.5831	0.886621	0.934957	0.978994	0.796045	-0.0367315	0.356963	0.719793
645	867	RDN25-1	0.123827	0.199553	0.71864	0.304369	0.258921	0.196445	0.253555	0.952625	0.891056	0.928383	0.943026	-0.000740288	0.986564	0.999449	0.734456	0.95885	0.892153	0.855818	0.937942	0.991533	0.981405	0.963188	-0.0502509	0.496958	0.827027	0.406366	0.543103	0.588659	0.457355	0.900743	0.88379	0.930837	0.90041	0.0625041	0.0561947	0.170447	0.311347	0.25772	0.077451	0.161389	0.61758	0.526664	0.23946	0.392381	0.0024144	0.951734	0.982405
645	876	RDN25-1	0.097012	0.315606	0.806901	0.306921	0.457979	0.30404	0.623082	0.952625	0.915077	0.975159	0.978758	0.0216817	0.62181	0.86959	0.567461	0.939969	0.555935	0.603017	0.886189	0.988887	0.887658	0.891498	-0.012407	0.866885	0.957899	0.967459	0.733685	0.95241	0.448291	0.996787	0.935445	0.993227	0.90041	-0.0475446	0.146528	0.351874	0.387166	0.22389	0.314871	0.0145952	0.687655	0.48186	0.580689	0.0636075	0.017079	0.668505	0.883039
645	898	RDN25-1	0.107464	0.266032	0.783763	0.378234	0.440932	0.427424	0.39102	0.970432	0.911332	0.979865	0.963664	0.073034	0.0961832	0.373127	0.289007	0.426717	0.352602	0.284667	0.731001	0.796419	0.774705	0.732037	-0.0339686	0.646217	0.882975	0.539497	0.499337	0.442375	0.488518	0.94394	0.871252	0.870306	0.90041	0.00274162	0.933314	0.977532	0.763788	0.681402	0.544394	0.646888	0.916964	0.848124	0.776693	0.833185	0.0245634	0.537964	0.826518
645	908	RDN25-1	0.00617964	0.94915	0.99535	0.823686	0.96636	0.88693	0.846009	0.995385	0.997597	0.997721	0.995705	-0.057718	0.188812	0.537557	0.44866	0.262408	0.321582	0.369088	0.836507	0.668226	0.755638	0.789852	0.0549751	0.457339	0.80776	0.37758	0.609336	0.423165	0.383206	0.889191	0.896327	0.865607	0.890455	-0.0254317	0.437564	0.698441	0.850096	0.496212	0.666797	0.760471	0.952395	0.747304	0.847873	0.901452	0.0107388	0.787755	0.935151
645	960	RDN25-1	0.0364164	0.706961	0.940413	0.824705	0.592459	0.864796	0.795665	0.995385	0.941893	0.997721	0.98932	0.0183249	0.67675	0.886015	0.926542	0.51546	0.98864	0.866577	0.982585	0.848288	0.993996	0.966665	0.0339847	0.64606	0.882975	0.800541	0.522442	0.850038	0.761026	0.989652	0.883318	0.967816	0.948305	-0.0428909	0.190313	0.417649	0.206197	0.686181	0.118579	0.172518	0.480481	0.850298	0.31766	0.409186	-0.0214332	0.590998	0.84755
645	966	RDN25-1	0.0748301	0.439328	0.866556	0.550467	0.725227	0.816135	0.620671	0.99193	0.96306	0.997721	0.978758	-0.0807048	0.0659263	0.302168	0.081638	0.0539107	0.00808241	0.0320601	0.456478	0.334934	0.118662	0.27432	-0.0567385	0.443013	0.798779	0.394063	0.279296	0.172233	0.301159	0.899273	0.763777	0.781742	0.864274	-0.038071	0.245086	0.498343	0.253106	0.157991	0.024462	0.106635	0.545216	0.392811	0.100239	0.295296	0.0369545	0.35405	0.719793
645	986	RDN25-1	0.0318126	0.742619	0.945193	0.798139	0.5919	0.654439	0.873263	0.995385	0.941893	0.995892	0.995705	-0.0151211	0.730843	0.909739	0.705749	0.857083	0.980526	0.532559	0.934294	0.967482	0.992939	0.865914	-0.126187	0.0869815	0.415242	0.105848	0.245157	0.153427	0.0703092	0.737733	0.744496	0.770949	0.659902	-0.0134698	0.680981	0.87182	0.675136	0.811746	0.991272	0.454453	0.872968	0.922647	0.995438	0.698422	-0.0261271	0.512393	0.814895
645	990	RDN25-1	0.126468	0.190057	0.703423	0.253384	0.322716	0.342251	0.316708	0.943193	0.891056	0.979865	0.943026	-0.0349284	0.426721	0.759828	0.422482	0.366771	0.192031	0.221568	0.823608	0.768452	0.622594	0.668666	-0.0361384	0.625292	0.876847	0.58693	0.515271	0.402263	0.43571	0.9515	0.881303	0.853915	0.90041	-0.00511655	0.875906	0.957492	0.764706	0.63341	0.374672	0.435176	0.917493	0.827834	0.638133	0.682505	0.0202365	0.611888	0.852606
645	1004	RDN25-1	0.287634	0.00242354	0.0929401	0.0233925	0.0176985	0.0031815	0.0143077	0.539258	0.43879	0.245911	0.493655	0.0349847	0.425976	0.759699	0.643246	0.940517	0.418433	0.814303	0.917777	0.989067	0.816971	0.954503	0.00969379	0.895808	0.965545	0.538536	0.730396	0.849152	0.639538	0.942887	0.935317	0.967816	0.929523	-0.0403616	0.217816	0.459043	0.0242815	0.132652	0.37755	0.0251865	0.10653	0.35142	0.640544	0.0973383	0.0395406	0.32136	0.69177
645	1042	RDN25-1	0.150042	0.11941	0.603491	0.0801453	0.26347	0.164757	0.233785	0.743145	0.891056	0.914659	0.933718	-0.00177485	0.967794	0.996534	0.586516	0.599956	0.824978	0.519181	0.895841	0.887773	0.960618	0.864096	-0.0540132	0.46526	0.814279	0.777917	0.33041	0.423581	0.285815	0.989426	0.784787	0.865607	0.86051	-0.0280567	0.391736	0.657139	0.946797	0.272362	0.347145	0.135324	0.980286	0.540202	0.608887	0.351763	0.030282	0.447649	0.775796
645	1052	RDN25-1	0.0792444	0.412737	0.854855	0.546322	0.677758	0.481822	0.480268	0.99193	0.948917	0.979865	0.967168	0.00267681	0.951444	0.990223	0.795948	0.602855	0.922122	0.9214	0.956886	0.888537	0.985339	0.985423	-0.112626	0.12692	0.502013	0.112228	0.0885863	0.127297	0.125314	0.759449	0.573261	0.734505	0.74868	-0.0182401	0.577703	0.809423	0.434056	0.321278	0.515805	0.506932	0.725564	0.593448	0.755314	0.735625	0.0344746	0.387296	0.739431
645	1056	RDN25-1	-0.0148082	0.878534	0.97932	0.870649	0.846895	0.537581	0.889665	0.995385	0.991692	0.979865	0.995705	-0.0033573	0.939121	0.986751	0.597459	0.877525	0.301522	0.956635	0.903594	0.970816	0.735747	0.995041	-0.114142	0.121853	0.495348	0.310149	0.163716	0.0396302	0.147617	0.867306	0.687293	0.571418	0.760661	-0.024231	0.459511	0.714313	0.865703	0.568716	0.0681381	0.5442	0.957682	0.793305	0.215756	0.768488	0.00606484	0.87915	0.962316
645	1110	RDN25-1	0.0382483	0.692942	0.937818	0.686073	0.940143	0.553221	0.485967	0.995083	0.997597	0.983595	0.968555	-0.0418689	0.340652	0.687179	0.479162	0.148779	0.69456	0.851484	0.848828	0.538556	0.929742	0.963188	-0.000384757	0.995853	0.998581	0.966414	0.589461	0.781723	0.681519	0.996787	0.887706	0.965422	0.930667	0.0278905	0.394548	0.658714	0.476204	0.728037	0.205934	0.118786	0.756629	0.879265	0.454009	0.319519	0.0463518	0.244967	0.619756
645	1124	RDN25-1	-0.160033	0.0964607	0.564631	0.0692773	0.0544281	0.0633802	0.0482198	0.743145	0.646813	0.816487	0.727543	-0.0136149	0.756764	0.921955	0.44194	0.325321	0.401279	0.278087	0.832851	0.731086	0.808094	0.72596	0.0129975	0.860613	0.95482	0.856632	0.69892	0.847202	0.734005	0.989652	0.925325	0.967816	0.938669	0.0286834	0.381242	0.646326	0.98315	0.737343	0.991038	0.77601	0.994282	0.88648	0.995438	0.909627	0.0464877	0.243586	0.618342
645	1133	RDN25-1	-0.0433256	0.654638	0.932338	0.892795	0.312768	0.535194	0.591657	0.995385	0.891056	0.979865	0.978758	0.0088801	0.839906	0.955371	0.477676	0.352065	0.823605	0.961198	0.848828	0.755287	0.960567	0.995041	-0.0444415	0.54806	0.849557	0.852795	0.203368	0.415225	0.478757	0.989652	0.709245	0.863232	0.90041	-0.00239809	0.941654	0.980838	0.545435	0.199719	0.572617	0.724815	0.800767	0.448218	0.794368	0.881427	0.0656827	0.0992625	0.399232
645	1437	RDN25-1	-0.0131291	0.892219	0.980318	0.674579	0.836818	0.906397	0.720383	0.99316	0.991674	0.997721	0.982726	0.107161	0.0144925	0.108991	0.152451	0.107396	0.0293072	0.0867677	0.584143	0.461924	0.270244	0.453331	0.0476363	0.519642	0.841542	0.83433	0.656604	0.537508	0.757002	0.989652	0.915456	0.904555	0.948148	-0.00788227	0.809885	0.925663	0.387516	0.748867	0.864669	0.42172	0.687655	0.890749	0.953167	0.673266	0.00913701	0.818816	0.942929
645	1449	RDN25-1	0.060776	0.530144	0.901809	0.544155	0.365444	0.387564	0.822258	0.99193	0.892843	0.979865	0.994181	0.081307	0.0639267	0.299537	0.119321	0.0526441	0.0289859	0.376429	0.527966	0.329139	0.268872	0.793782	0.0188439	0.799039	0.931331	0.795565	0.519406	0.558737	0.807959	0.989652	0.883318	0.920773	0.959474	-0.0317282	0.332744	0.600835	0.508659	0.921268	0.913393	0.072644	0.775381	0.969989	0.968683	0.220703	-0.0369765	0.353763	0.719793
645	1450	RDN25-1	-0.0131281	0.892227	0.980318	0.847703	0.807399	0.872275	0.648574	0.995385	0.986201	0.997721	0.981654	0.0889924	0.0425112	0.227555	0.0229444	0.213845	0.0848882	0.255413	0.247123	0.616888	0.44039	0.71029	0.0180905	0.806913	0.934918	0.530496	0.95523	0.851662	0.846973	0.93919	0.995461	0.96853	0.966529	-0.0340638	0.298366	0.563883	0.982993	0.373594	0.346449	0.0828512	0.994282	0.644652	0.608887	0.245195	0.0132259	0.740201	0.916625
645	1888	RDN25-1	0.0357026	0.712451	0.940638	0.701888	0.377382	0.853773	0.604429	0.995385	0.898043	0.997721	0.978758	-0.0162686	0.711298	0.90116	0.821641	0.0159017	0.506146	0.987586	0.964052	0.178588	0.865851	0.998151	0.0184228	0.803438	0.933848	0.782274	0.193397	0.98451	0.6523	0.989652	0.705579	0.999725	0.929523	-0.0438929	0.180155	0.402598	0.371642	0.000991187	0.125539	0.488764	0.680529	0.00811998	0.327297	0.719996	0.130403	0.00102624	0.0204229
645	2129	RDN25-1	0.157373	0.1022	0.570586	0.399701	0.423908	0.0693914	0.140276	0.978595	0.908276	0.847002	0.850522	0.0102504	0.815614	0.947375	0.258853	0.31064	0.457298	0.971834	0.70177	0.7263	0.838835	0.996021	-0.0656351	0.374734	0.762734	0.0940636	0.111417	0.622917	0.345498	0.714448	0.617187	0.940877	0.885001	0.0133838	0.682909	0.871852	0.19571	0.268273	0.311128	0.900195	0.46672	0.536137	0.576617	0.959122	0.0721148	0.0702541	0.330124
645	2133	RDN25-1	0.0697057	0.47138	0.876756	0.846433	0.78194	0.325473	0.531315	0.995385	0.980795	0.979865	0.968555	0.023772	0.588607	0.850941	0.630547	0.792066	0.275288	0.71893	0.916769	0.949255	0.712063	0.922534	-0.0398211	0.590461	0.867651	0.273103	0.357581	0.907362	0.559624	0.86576	0.810212	0.985113	0.916151	0.0132958	0.68488	0.872214	0.414221	0.616863	0.268416	0.852429	0.70754	0.816272	0.527203	0.94403	0.0398737	0.317297	0.687164
645	2142	RDN25-1	0.0718435	0.457857	0.870707	0.628787	0.85718	0.5956	0.814577	0.99316	0.995518	0.995738	0.993411	0.0731071	0.0958498	0.372762	0.337372	0.734612	0.265863	0.609143	0.777591	0.930859	0.69933	0.892144	-0.100529	0.173349	0.582328	0.133593	0.0767833	0.133867	0.0584036	0.773946	0.564716	0.740635	0.621395	0.0433611	0.185495	0.410341	0.625	0.863753	0.518289	0.903738	0.844474	0.94523	0.7565	0.96077	0.0524631	0.188124	0.550681
645	2191	RDN25-1	0.157747	0.101376	0.569684	0.20576	0.234	0.112991	0.140425	0.911991	0.891056	0.912294	0.850522	-0.0238633	0.587175	0.850196	0.341421	0.374662	0.673307	0.504643	0.777591	0.77164	0.92118	0.85894	-0.0486097	0.511136	0.837706	0.35225	0.361682	0.562654	0.464224	0.878741	0.811007	0.923005	0.90041	0.00582171	0.858972	0.949787	0.629318	0.64371	0.82726	0.935714	0.848998	0.833011	0.931097	0.976204	0.0304019	0.445851	0.775005
645	2197	RDN25-1	0.0627724	0.516696	0.897613	0.810309	0.899063	0.497524	0.581984	0.995385	0.997597	0.979865	0.978758	0.0420131	0.33899	0.685066	0.938099	0.907504	0.330938	0.473772	0.983651	0.977227	0.765407	0.838227	-0.0378368	0.609119	0.871603	0.353817	0.315503	0.69146	0.570465	0.878741	0.778537	0.962956	0.917305	-0.0334198	0.307599	0.574395	0.109342	0.120381	0.496681	0.30026	0.313702	0.326144	0.740307	0.57263	0.0491021	0.21805	0.594587
645	2220	RDN25-1	0.0255837	0.79173	0.954673	0.789606	0.707882	0.625912	0.694071	0.995385	0.959903	0.995892	0.981654	-0.0410897	0.349721	0.693669	0.469443	0.0795131	0.734732	0.588028	0.847789	0.406724	0.943634	0.890349	-0.0278739	0.706449	0.90321	0.75311	0.278227	0.963034	0.86464	0.984684	0.763777	0.994797	0.966529	0.00101368	0.975319	0.992831	0.942532	0.22087	0.525079	0.690221	0.979423	0.479313	0.760699	0.86361	0.0660024	0.0976245	0.396517
645	2256	RDN25-1	0.115221	0.232848	0.752218	0.183758	0.470954	0.680947	0.306015	0.893537	0.919699	0.997721	0.943026	0.0136513	0.756133	0.9218	0.499367	0.692934	0.228367	0.965072	0.859421	0.920567	0.658904	0.995946	-0.047374	0.521946	0.842376	0.762084	0.325574	0.125791	0.454162	0.98658	0.783765	0.734505	0.90041	-0.0285161	0.384026	0.649375	0.895719	0.212239	0.00999572	0.302768	0.963154	0.465969	0.047246	0.574494	0.0377772	0.343431	0.709587
645	2258	RDN25-1	0.314325	0.000872825	0.0495704	0.00666782	0.00756607	0.00423053	0.00225277	0.312911	0.310682	0.271167	0.149564	-0.0470141	0.284575	0.635129	0.0948173	0.171315	0.108009	0.212583	0.489176	0.570618	0.493383	0.665881	-0.0507846	0.492393	0.824577	0.251443	0.313156	0.288793	0.408143	0.851795	0.775819	0.820226	0.90041	0.0129945	0.691652	0.876944	0.502935	0.657167	0.612362	0.973799	0.770532	0.840406	0.818143	0.99155	0.0365747	0.359021	0.719793
645	2260	RDN25-1	0.0599209	0.535958	0.901809	0.888592	0.637461	0.474419	0.492171	0.995385	0.947996	0.979865	0.968555	-0.000510509	0.990734	0.999449	0.393394	0.875801	0.800949	0.847809	0.805643	0.970445	0.958216	0.963059	-0.0322096	0.663387	0.888653	0.341801	0.633991	0.808907	0.777208	0.878741	0.907206	0.965422	0.953502	0.0336036	0.304944	0.571801	0.791192	0.643961	0.239394	0.261938	0.928237	0.833011	0.494209	0.523478	0.00904517	0.820606	0.943482
645	2264	RDN25-1	0.038853	0.688338	0.937818	0.798816	0.919038	0.783532	0.641811	0.995385	0.997597	0.997721	0.981654	-0.0531419	0.22637	0.583352	0.223246	0.0918893	0.199418	0.363579	0.669779	0.429689	0.630113	0.787075	-0.0628856	0.395113	0.77981	0.356463	0.192983	0.351156	0.48885	0.878741	0.705579	0.836691	0.90041	0.0194535	0.552656	0.792533	0.872864	0.567378	0.827511	0.471685	0.957682	0.792512	0.931097	0.710011	0.0498203	0.211385	0.584328
645	2266	RDN25-1	0.222073	0.0202953	0.308304	0.0101949	0.0530176	0.0271937	0.022196	0.384786	0.646813	0.602089	0.584873	-0.00862356	0.844471	0.956564	0.538667	0.679142	0.859764	0.974528	0.877439	0.920051	0.966143	0.996022	-0.0628857	0.395112	0.77981	0.794513	0.358197	0.424782	0.477406	0.989652	0.810803	0.866445	0.90041	-0.0352042	0.282472	0.54413	0.884258	0.329098	0.37241	0.468307	0.962233	0.60144	0.635516	0.708837	0.0166646	0.676087	0.886081
645	2278	RDN25-1	0.0211698	0.827043	0.960697	0.931677	0.992175	0.778396	0.841238	0.995385	0.999839	0.997721	0.994948	0.0164825	0.707675	0.900032	0.800183	0.925084	0.629502	0.749477	0.957797	0.985674	0.907975	0.937563	0.0335449	0.650336	0.883145	0.966236	0.896047	0.603175	0.677013	0.996787	0.983887	0.93567	0.929858	0.0471307	0.150079	0.356593	0.701527	0.639092	0.16787	0.23228	0.886621	0.831041	0.398882	0.492085	0.0222295	0.577281	0.843335
645	2280	RDN25-1	0.0530875	0.583523	0.908771	0.545548	0.50368	0.605967	0.915783	0.99193	0.924029	0.995892	0.995705	6.61901e-05	0.998799	0.999877	0.854402	0.753208	0.994048	0.389831	0.96959	0.93594	0.995943	0.797288	-0.0709072	0.337502	0.73822	0.453429	0.549539	0.366447	0.149632	0.912525	0.88379	0.836691	0.767046	-0.00440324	0.893095	0.961247	0.903421	0.781384	0.902924	0.228461	0.965283	0.905314	0.964588	0.487333	-0.0191549	0.631046	0.861087
645	2281	RDN25-1	0.038853	0.688338	0.937818	0.887649	0.999839	0.854338	0.915738	0.995385	0.999839	0.997721	0.995705	-0.0424791	0.333655	0.68307	0.215281	0.183077	0.20926	0.0610355	0.661706	0.584601	0.642769	0.385069	-0.0160015	0.828845	0.942837	0.622828	0.526479	0.64805	0.40419	0.952173	0.883318	0.945627	0.90041	-0.0296742	0.365004	0.631472	0.226556	0.197082	0.209634	0.0410871	0.512727	0.446878	0.459098	0.144725	0.0388748	0.329582	0.700867
645	2288	RDN25-1	0.172951	0.0721108	0.52205	0.14358	0.299549	0.178968	0.143136	0.843958	0.891056	0.914659	0.855606	0.0523365	0.233497	0.591983	0.5773	0.867913	0.763943	0.586164	0.890866	0.967482	0.951489	0.888886	-0.0822927	0.265449	0.677936	0.199011	0.0942609	0.129751	0.169652	0.813378	0.584175	0.734985	0.788236	-0.0503021	0.124485	0.314459	0.102302	0.033708	0.0270598	0.0505159	0.300659	0.131042	0.108239	0.169429	0.0624712	0.116956	0.435487
645	2314	RDN25-1	0.0222153	0.818645	0.96	0.856646	0.999504	0.714323	0.907891	0.995385	0.999839	0.997721	0.995705	0.055626	0.205371	0.556846	0.331198	0.583392	0.15537	0.357698	0.777131	0.882211	0.574875	0.787075	0.0612262	0.407728	0.787814	0.47833	0.651474	0.333772	0.518076	0.922066	0.912619	0.836691	0.905631	0.00175074	0.957386	0.986553	0.970316	0.701177	0.66976	0.823018	0.989903	0.859866	0.849973	0.926292	0.0221481	0.578677	0.844547
645	2337	RDN25-1	-0.0808461	0.403326	0.846753	0.756466	0.51288	0.24553	0.445601	0.995385	0.92827	0.945948	0.9646	-0.0620143	0.15792	0.485705	0.803793	0.396739	0.0455832	0.232414	0.958326	0.786891	0.319747	0.684734	0.0517022	0.484598	0.820902	0.21853	0.4742	0.858247	0.483879	0.832214	0.855683	0.970635	0.90041	-0.042955	0.189651	0.416751	0.897303	0.538485	0.0423142	0.307492	0.963426	0.772456	0.154019	0.580669	-0.0102794	0.796631	0.93718
645	2340	RDN25-1	0.026352	0.785623	0.954043	0.969374	0.474352	0.525174	0.669604	0.996965	0.919699	0.979865	0.981654	-0.0541109	0.218005	0.576287	0.154903	0.958547	0.754302	0.451104	0.584323	0.991533	0.949519	0.825564	-0.0247955	0.73761	0.914103	0.563579	0.762562	0.862007	0.921981	0.94709	0.943064	0.972143	0.977711	0.0196292	0.549072	0.788424	0.951141	0.184084	0.14269	0.344347	0.981183	0.430785	0.357963	0.611654	-0.0509417	0.201273	0.568821
645	2347	RDN25-1	0.0435956	0.652625	0.932338	0.688379	0.998741	0.548381	0.877484	0.995083	0.999839	0.983595	0.995705	-0.0308573	0.482599	0.793872	0.542973	0.224155	0.791669	0.232042	0.883439	0.627347	0.957145	0.684408	-0.0477062	0.519029	0.841542	0.543565	0.292715	0.70413	0.336327	0.944941	0.766773	0.964131	0.882627	0.0171836	0.599937	0.824347	0.730693	0.621251	0.37958	0.78214	0.901108	0.820139	0.641535	0.912179	0.0434254	0.276073	0.649045
645	2349	RDN25-1	0.0180728	0.852032	0.969183	0.820693	0.789431	0.881104	0.915368	0.995385	0.983701	0.997721	0.995705	0.0489681	0.265011	0.621651	0.891622	0.973102	0.354138	0.396009	0.97893	0.995443	0.776208	0.798163	-0.0298057	0.687137	0.895433	0.381305	0.375813	0.680264	0.637647	0.889191	0.821493	0.957881	0.929523	0.00100999	0.975409	0.992831	0.36106	0.387571	0.964144	0.872288	0.670576	0.658395	0.986286	0.947522	0.0469112	0.239312	0.618342
645	2351	RDN25-1	0.0101151	0.91686	0.986639	0.647331	0.743903	0.767491	0.920499	0.99316	0.971164	0.997721	0.995705	0.0793767	0.0705185	0.316469	0.0295518	0.0866728	0.0457476	0.105677	0.288707	0.418752	0.319747	0.49154	-0.0317263	0.668136	0.890459	0.94351	0.939909	0.882978	0.687206	0.996787	0.992276	0.980851	0.931877	0.0450089	0.16932	0.386057	0.063699	0.186424	0.10085	0.245664	0.219398	0.433944	0.284676	0.505357	-0.0251979	0.527512	0.823208
645	2416	RDN25-1	-0.0689768	0.47604	0.878474	0.792392	0.166876	0.399503	0.467931	0.995385	0.821858	0.979865	0.965245	-0.0324487	0.460297	0.784716	0.863957	0.0650102	0.321479	0.448458	0.972736	0.36143	0.755638	0.824947	-0.0988065	0.18087	0.59059	0.481703	0.0383719	0.142257	0.186528	0.923353	0.466858	0.752214	0.79127	0.0249739	0.445861	0.704396	0.134379	0.297589	0.840415	0.603856	0.364979	0.568774	0.938636	0.807189	0.0801835	0.0440687	0.245621
645	2417	RDN25-1	0.02722	0.77874	0.954043	0.951104	0.626646	0.776745	0.854148	0.996965	0.94725	0.997721	0.995705	-0.0700228	0.110739	0.409204	0.0537926	0.463983	0.170264	0.109893	0.397098	0.816361	0.596605	0.493264	-0.0477518	0.518629	0.841542	0.318843	0.795848	0.560628	0.474422	0.868392	0.952668	0.922562	0.90041	-0.024388	0.456608	0.71249	0.192662	0.985426	0.568266	0.396919	0.461968	0.9969	0.791235	0.654914	-0.0253585	0.524882	0.822195
645	2421	RDN25-1	-0.0687648	0.4774	0.879313	0.331089	0.745845	0.532045	0.633109	0.961935	0.972315	0.979865	0.981654	0.0189158	0.666943	0.883399	0.803026	0.388264	0.631055	0.425755	0.958326	0.779274	0.909217	0.811963	-0.0330133	0.655519	0.885444	0.423458	0.992571	0.723525	0.871184	0.908995	0.997698	0.964961	0.970252	-0.0160271	0.624709	0.840018	0.277369	0.737714	0.781789	0.913166	0.573958	0.88648	0.907415	0.967116	-0.0338194	0.396386	0.745261
645	2619	RDN25-1	0.171059	0.0753299	0.53104	0.183988	0.035298	0.175071	0.0736365	0.893537	0.618421	0.914659	0.789221	-0.0443543	0.312736	0.662478	0.143042	0.864626	0.115032	0.477077	0.568706	0.967482	0.508931	0.839735	-0.0902827	0.22165	0.637207	0.126021	0.680229	0.114911	0.302649	0.770638	0.922555	0.729436	0.864274	-0.0631991	0.0535081	0.164418	0.0282326	0.873327	0.01404	0.165357	0.119863	0.94839	0.0629643	0.399043	-0.0547524	0.169545	0.516707
645	2634	RDN25-1	0.121822	0.206986	0.726103	0.442876	0.398959	0.182723	0.264333	0.983998	0.903623	0.914659	0.943026	0.0356726	0.416929	0.752528	0.898904	0.942014	0.322119	0.584175	0.979022	0.989453	0.755638	0.886892	0.128059	0.0823619	0.400739	0.290902	0.260495	0.0718047	0.127316	0.867306	0.753944	0.678334	0.74868	0.0310327	0.343455	0.610216	0.796539	0.997032	0.259745	0.566208	0.930489	0.998823	0.517437	0.783988	0.0312303	0.43355	0.769502
645	2640	RDN25-1	-0.0363431	0.707525	0.940511	0.498315	0.450351	0.526446	0.650937	0.99193	0.912316	0.979865	0.981654	0.0311766	0.478077	0.791692	0.956005	0.818131	0.954715	0.662505	0.987493	0.958016	0.987875	0.909527	-0.0632278	0.392541	0.779752	0.232638	0.210382	0.246677	0.353452	0.836055	0.715376	0.809322	0.885001	-0.00451407	0.89042	0.960771	0.385139	0.34929	0.40765	0.714064	0.686738	0.623597	0.666566	0.876487	0.0452152	0.256744	0.632029
645	2724	RDN25-1	-0.02543	0.792953	0.954673	0.360428	0.952818	0.945669	0.622122	0.965316	0.997597	0.99808	0.978758	0.0410159	0.350589	0.694014	0.592912	0.325798	0.232769	0.740584	0.899637	0.731086	0.664177	0.933598	-0.0275817	0.709387	0.90321	0.233011	0.921419	0.908291	0.506017	0.836055	0.9892	0.985113	0.903493	-0.00882641	0.787628	0.917591	0.0774134	0.847676	0.807986	0.387254	0.25241	0.937579	0.922447	0.647393	-0.0190364	0.633159	0.862621
645	2729	RDN25-1	-0.0265202	0.784288	0.954043	0.818179	0.954017	0.931029	0.85875	0.995385	0.997597	0.997721	0.995705	0.0138957	0.751909	0.919578	0.759299	0.445398	0.526594	0.650318	0.947052	0.803498	0.87671	0.908404	0.0270405	0.714839	0.90495	0.716676	0.490167	0.571869	0.652386	0.968644	0.866615	0.92664	0.929523	0.0237528	0.468421	0.722707	0.554069	0.287748	0.296483	0.407606	0.803628	0.55719	0.563602	0.663324	-0.0327487	0.411516	0.756015
645	2735	RDN25-1	0.057442	0.552988	0.903104	0.466122	0.347335	0.564456	0.537886	0.98922	0.892077	0.988296	0.968555	-0.0127301	0.772119	0.929591	0.91625	0.607975	0.819718	0.878723	0.980816	0.888537	0.959878	0.970887	-0.0164291	0.824344	0.940584	0.980875	0.749596	0.848992	0.886773	0.996787	0.93968	0.967816	0.9709	-0.00462212	0.887815	0.959714	0.757191	0.457817	0.934586	0.987627	0.914024	0.713716	0.977975	0.996347	-0.0440654	0.26905	0.645016
645	2791	RDN25-1	0.095513	0.323177	0.814455	0.183329	0.700131	0.306181	0.444235	0.893537	0.955815	0.977591	0.9646	-0.000291606	0.994707	0.999449	0.429947	0.373086	0.865576	0.711572	0.827161	0.771416	0.970446	0.921743	0.0512713	0.48825	0.822238	0.249326	0.973762	0.447912	0.671108	0.851795	0.996242	0.870306	0.929548	-0.0454873	0.164828	0.380214	0.950479	0.0607867	0.354092	0.102491	0.981138	0.202983	0.61626	0.285626	0.054114	0.174582	0.529045
645	2793	RDN25-1	0.0379148	0.695487	0.937818	0.401194	0.675312	0.496605	0.859112	0.978595	0.948917	0.979865	0.995705	-0.020401	0.642546	0.878599	0.588788	0.830948	0.823607	0.413116	0.896085	0.961991	0.960567	0.805214	-0.0684762	0.354367	0.751837	0.815092	0.479889	0.639511	0.261118	0.989652	0.85914	0.943986	0.844052	-0.00592452	0.856508	0.948668	0.327894	0.978593	0.519035	0.506783	0.632676	0.993214	0.75653	0.735625	-0.00735102	0.853785	0.953693
645	2815	RDN25-1	0.0530875	0.583523	0.908771	0.715004	0.879589	0.508883	0.593706	0.995385	0.997597	0.979865	0.978758	-0.0573903	0.191339	0.541469	0.177378	0.123335	0.387437	0.252718	0.619055	0.489615	0.79837	0.705253	-0.0628862	0.395108	0.77981	0.338966	0.249878	0.538916	0.432441	0.877629	0.74622	0.904555	0.90041	-0.0621225	0.0577167	0.174101	0.0824844	0.0626822	0.227992	0.116164	0.26241	0.207364	0.478182	0.314129	0.0367432	0.356811	0.719793
645	2826	RDN25-1	0.125153	0.194742	0.713116	0.152534	0.313785	0.171592	0.335977	0.849015	0.891056	0.914659	0.948386	0.0218738	0.618725	0.86653	0.402447	0.935271	0.473725	0.903595	0.814601	0.987197	0.849795	0.979496	-0.0451237	0.541928	0.848386	0.787718	0.473929	0.692425	0.353703	0.989652	0.855683	0.962956	0.885001	0.00012022	0.997072	0.998428	0.600988	0.752123	0.724809	0.475448	0.82821	0.893274	0.877382	0.711548	0.0169101	0.671591	0.883351
645	2843	RDN25-1	0.0252899	0.794068	0.955666	0.914256	0.980093	0.889052	0.830419	0.995385	0.998971	0.997721	0.994181	-0.0337141	0.442982	0.771646	0.374169	0.356932	0.369362	0.449368	0.797109	0.75879	0.787893	0.824947	-0.0674383	0.361725	0.754607	0.317516	0.298343	0.32065	0.366795	0.868392	0.766773	0.834123	0.890455	0.0223512	0.495078	0.745128	0.852618	0.996357	0.775672	0.627083	0.952395	0.998823	0.905277	0.823343	0.0225938	0.571056	0.840794
645	2865	RDN25-1	0.181155	0.0594113	0.480837	0.183545	0.244879	0.0425965	0.135601	0.893537	0.891056	0.713016	0.846458	-0.0040946	0.925787	0.983406	0.364544	0.314067	0.690222	0.473023	0.791767	0.730224	0.92705	0.838189	0.00933195	0.899676	0.965545	0.665051	0.578721	0.673836	0.781071	0.959472	0.887706	0.954631	0.954122	0.0222556	0.496926	0.746068	0.614478	0.507933	0.244153	0.81782	0.838447	0.75512	0.498274	0.922923	0.0573941	0.149853	0.490773
645	2870	RDN25-1	-0.0891026	0.356859	0.821103	0.207584	0.693755	0.516393	0.310725	0.911991	0.953894	0.979865	0.943026	0.149439	0.00062912	0.00912917	0.0433839	0.00124849	0.00049954	0.00546312	0.358566	0.0366477	0.0179835	0.0985453	-0.0828569	0.262174	0.673668	0.126005	0.675535	0.448276	0.218068	0.770638	0.922297	0.870306	0.828154	0.0508618	0.120344	0.307535	0.839612	0.0661764	0.0624648	0.340503	0.950553	0.213913	0.202164	0.608736	-0.0467354	0.24108	0.618342
645	2880	RDN25-1	-0.0607965	0.530005	0.901809	0.658129	0.479713	0.476315	0.533644	0.99316	0.919699	0.979865	0.968555	0.0230923	0.599314	0.859083	0.481261	0.901602	0.822258	0.675657	0.848828	0.976525	0.960397	0.916689	-0.0167676	0.820786	0.9391	0.980686	0.709342	0.717188	0.806444	0.996787	0.928717	0.96457	0.95896	0.0147023	0.653615	0.856407	0.507684	0.987489	0.94355	0.753624	0.774794	0.997063	0.981693	0.896669	0.0155358	0.696903	0.899583
645	2921	RDN25-1	0.31794	0.000754443	0.0444423	0.000881245	0.00634577	0.00165205	0.000832571	0.120029	0.302301	0.159391	0.10419	-0.00901146	0.83757	0.955317	0.882121	0.478887	0.734616	0.968723	0.977543	0.824175	0.943634	0.996021	-0.0306771	0.678491	0.892754	0.866784	0.453503	0.625843	0.801892	0.990136	0.849793	0.942067	0.957672	-0.0168651	0.606716	0.826564	0.997808	0.336011	0.532756	0.878722	0.999105	0.610024	0.767589	0.949764	0.0342682	0.390145	0.740714
645	2922	RDN25-1	0.31794	0.000754443	0.0444423	0.00091346	0.00970398	0.00165784	0.0023479	0.120029	0.354195	0.159391	0.149564	0.0185775	0.672551	0.883521	0.521034	0.610087	0.831999	0.984218	0.867048	0.888537	0.962836	0.997888	-0.0176156	0.811887	0.935099	0.983664	0.436945	0.746135	0.636717	0.996787	0.841498	0.964961	0.929523	-0.0151775	0.643185	0.84984	0.986259	0.221921	0.559282	0.371164	0.994649	0.480403	0.785985	0.636282	0.0497173	0.212332	0.585289
645	2923	RDN25-1	0.150042	0.11941	0.603491	0.100582	0.444147	0.147172	0.154429	0.776692	0.911332	0.912294	0.868651	0.0435666	0.321416	0.670567	0.238582	0.684276	0.416712	0.446791	0.692045	0.920285	0.815866	0.824929	0.100433	0.173761	0.582328	0.139768	0.709254	0.217021	0.22934	0.777305	0.928717	0.79846	0.83762	-0.0188964	0.564089	0.798749	0.983688	0.100361	0.579623	0.518629	0.994282	0.286372	0.8016	0.744785	0.0683495	0.0862497	0.37093
645	2944	RDN25-1	0.0959192	0.321114	0.814031	0.505772	0.344242	0.306927	0.560113	0.99193	0.892077	0.977591	0.973203	0.0563971	0.199149	0.550259	0.582985	0.306712	0.195088	0.690664	0.892823	0.720857	0.626762	0.917676	0.0647111	0.38151	0.769561	0.64272	0.413743	0.356472	0.722757	0.953659	0.834248	0.836691	0.936623	0.0265479	0.417712	0.678809	0.993438	0.539851	0.381788	0.790326	0.998759	0.7732	0.642754	0.917334	-0.00603765	0.879688	0.962316
645	2946	RDN25-1	0.127926	0.184957	0.694698	0.130751	0.18191	0.241721	0.20484	0.828429	0.847622	0.939707	0.911157	-0.0354179	0.420265	0.754005	0.900864	0.746713	0.372659	0.477383	0.979103	0.93594	0.791073	0.839735	-0.075894	0.304536	0.711447	0.562351	0.486207	0.282333	0.337009	0.94709	0.864111	0.820226	0.883011	-0.00837748	0.798191	0.922069	0.647586	0.890667	0.660995	0.838852	0.860392	0.955561	0.847873	0.9353	-0.0156844	0.69415	0.897382
645	2948	RDN25-1	-0.0212983	0.82601	0.960697	0.990805	0.62485	0.787776	0.913038	0.997931	0.94725	0.997721	0.995705	0.0671278	0.126317	0.437032	0.104526	0.559667	0.221083	0.115587	0.504892	0.869701	0.655022	0.502817	-0.0656361	0.374727	0.762734	0.576312	0.261629	0.363327	0.480293	0.947676	0.754265	0.836691	0.90041	-0.016835	0.607357	0.826564	0.941547	0.362622	0.561675	0.863923	0.979233	0.634077	0.788499	0.946889	0.0315528	0.428814	0.766633
645	2959	RDN25-1	0.0447142	0.644312	0.929011	0.858468	0.780547	0.621429	0.474695	0.995385	0.980795	0.995892	0.967168	-0.0318771	0.468241	0.788784	0.280471	0.446818	0.599614	0.93784	0.724046	0.80409	0.899084	0.99125	0.0435899	0.555762	0.852272	0.83085	0.737985	0.533061	0.362482	0.989652	0.93702	0.903125	0.890455	0.0107846	0.742035	0.900307	0.72962	0.942439	0.67781	0.317312	0.901053	0.978046	0.852332	0.59016	0.0146226	0.713912	0.904634
645	2975	RDN25-1	0.0787524	0.415654	0.854855	0.516725	0.356861	0.339127	0.446372	0.99193	0.892843	0.979865	0.9646	0.00664282	0.879884	0.968372	0.929615	0.6548	0.610791	0.914692	0.982585	0.912705	0.899084	0.98484	-0.0186928	0.800618	0.931642	0.712513	0.981604	0.999544	0.798731	0.968644	0.996242	0.999972	0.957672	0.0224122	0.493901	0.745128	0.804503	0.417441	0.299822	0.587936	0.933025	0.6797	0.566451	0.798221	-0.0206904	0.603926	0.850142
649	650	RDN25-1	0.387706	3.11029e-05	0.00426887	0.871038	0.120297	0.998286	0.759438	0.995385	0.778651	0.999984	0.98932	0.326376	2.26438e-14	3.24299e-12	0.104898	9.72665e-05	0.159786	0.426143	0.504892	0.00639041	0.579198	0.812113	0.369899	2.19452e-07	2.58169e-05	0.644338	0.0294296	0.794873	0.894959	0.953659	0.409456	0.965422	0.973675	0.603553	9.09256e-94	3.74386e-91	9.07318e-10	0.0221087	2.84176e-13	1.45308e-16	4.46425e-08	0.0960357	1.91491e-11	1.6603e-14	0.520519	4.20052e-45	1.38365e-41
649	663	RDN25-1	-0.0336078	0.728645	0.944572	0.544062	0.148385	0.428744	0.428926	0.99193	0.800012	0.979865	0.9646	0.0431222	0.326382	0.676374	0.800524	0.193627	0.934866	0.938709	0.957797	0.593848	0.985339	0.99125	0.0747256	0.312063	0.717832	0.578989	0.581588	0.726858	0.722641	0.947901	0.887706	0.964961	0.936623	0.17524	7.03892e-08	5.34244e-07	0.00092307	0.305836	0.00107156	0.000805616	0.00648617	0.575742	0.00656427	0.00511391	0.122016	0.00213759	0.0345159
649	776	RDN25-1	0.0947385	0.327135	0.818209	0.582148	0.23831	0.46631	0.411665	0.99316	0.891056	0.979865	0.9646	-0.0713357	0.104192	0.395186	0.0424123	0.52362	0.0649254	0.0920334	0.354967	0.853264	0.382565	0.463643	0.101676	0.168468	0.574465	0.430996	0.120727	0.303438	0.249624	0.912525	0.628663	0.823258	0.842519	0.0684005	0.036612	0.121328	0.489328	0.0575369	0.227459	0.141598	0.762811	0.196373	0.477828	0.362336	-0.0324516	0.415775	0.757816
649	805	RDN25-1	-0.051944	0.591667	0.910799	0.317426	0.12901	0.302204	0.133232	0.953367	0.78152	0.975159	0.845987	0.0178745	0.684263	0.889427	0.524455	0.123202	0.476153	0.0914419	0.867048	0.489615	0.852008	0.463643	-0.0165536	0.823036	0.940584	0.400357	0.137636	0.376578	0.135566	0.900743	0.642464	0.84562	0.752226	0.27721	6.12124e-18	2.31763e-16	1.76429e-07	0.00117334	5.69142e-09	2.23043e-06	3.81757e-06	0.00928776	1.20621e-07	2.36354e-05	0.111656	0.00498534	0.0607284
649	807	RDN25-1	0.134298	0.163844	0.656572	0.101284	0.236825	0.516442	0.36217	0.776692	0.891056	0.979865	0.954535	-0.012143	0.782359	0.931488	0.66382	0.751425	0.104481	0.268233	0.918756	0.93594	0.490316	0.717836	0.153112	0.0374594	0.268517	0.0200744	0.0896538	0.279915	0.154688	0.532883	0.573261	0.818652	0.772356	0.209697	9.66285e-11	1.09757e-09	2.42732e-08	0.000109812	0.000285223	1.1281e-05	6.71472e-07	0.00128903	0.00198298	9.91524e-05	0.00722331	0.856297	0.953693
649	817	RDN25-1	-0.0302483	0.754864	0.949328	0.766083	0.952835	0.78652	0.918631	0.995385	0.997597	0.997721	0.995705	0.0556475	0.205196	0.556846	0.306775	0.130899	0.242475	0.124547	0.748439	0.501462	0.673474	0.519201	0.169215	0.021301	0.192763	0.0372055	0.0166567	0.0283813	0.0153822	0.607304	0.33162	0.495547	0.430588	0.248963	1.16002e-14	2.38819e-13	1.2317e-08	4.42941e-08	9.68527e-11	1.67273e-12	3.92789e-07	1.90828e-06	3.63613e-09	7.99259e-11	-0.0366356	0.358221	0.719793
649	867	RDN25-1	-0.00349067	0.971264	0.996313	0.774361	0.884033	0.794467	0.780932	0.995385	0.997597	0.997721	0.98932	-0.062698	0.153378	0.48117	0.0975236	0.219584	0.0849909	0.0749266	0.493819	0.621928	0.44039	0.417176	0.0671986	0.363439	0.755082	0.616138	0.525541	0.576652	0.589442	0.952173	0.883318	0.926946	0.926331	0.0614495	0.0604846	0.179169	0.429659	0.354264	0.333315	0.344696	0.723054	0.629058	0.595964	0.611654	0.0122775	0.758228	0.924976
649	876	RDN25-1	0.118306	0.220494	0.743405	0.466665	0.0864275	0.435105	0.957558	0.98922	0.736087	0.979865	0.995705	0.0794963	0.0700944	0.315425	0.496265	0.0168207	0.416324	0.364422	0.858581	0.184398	0.815866	0.787583	-0.0648182	0.38072	0.768439	0.186095	0.985368	0.188588	0.0162208	0.808345	0.99713	0.790649	0.430588	0.203363	3.5552e-10	3.8146e-09	0.000247524	2.89639e-07	2.55448e-05	0.034833	0.00198927	9.63507e-06	0.000220828	0.12609	-0.066401	0.0956128	0.389788
649	898	RDN25-1	0.217532	0.0230747	0.331913	0.0458167	0.0699011	0.0698677	0.0741797	0.706629	0.702359	0.847002	0.789221	0.0216905	0.621669	0.86959	0.873074	0.955473	0.776268	0.721297	0.974566	0.991533	0.954334	0.923494	0.125759	0.0880654	0.41721	0.165186	0.2424	0.252423	0.267946	0.796529	0.741827	0.815631	0.852495	0.21501	3.13625e-11	3.77037e-10	4.00185e-06	0.000276805	4.24777e-06	3.95789e-06	5.25844e-05	0.00282814	4.42982e-05	4.00051e-05	0.0251024	0.529078	0.82428
649	908	RDN25-1	0.0215523	0.823968	0.960697	0.932662	0.422297	0.906275	0.948539	0.995385	0.908276	0.997721	0.995705	-0.0583399	0.184084	0.529122	0.18591	0.00639652	0.173165	0.135739	0.627983	0.101265	0.59834	0.544582	0.140945	0.0556667	0.332788	0.113791	0.698416	0.0943741	0.10685	0.759449	0.925325	0.718301	0.727639	0.160116	8.71741e-07	5.72015e-06	0.000835476	0.31701	0.000128834	0.000161434	0.00595022	0.588348	0.000948394	0.00116873	0.107887	0.00667521	0.0749372
649	960	RDN25-1	0.0600035	0.535395	0.901809	0.767481	0.803542	0.62428	0.591657	0.995385	0.986201	0.995892	0.978758	0.0101161	0.817988	0.947375	0.721596	0.208757	0.998734	0.924416	0.936336	0.612133	0.999114	0.986244	-0.0249589	0.735944	0.913983	0.506463	0.196543	0.658245	0.69917	0.93466	0.708359	0.950041	0.932143	0.0231675	0.479456	0.732526	0.890772	0.230133	0.740733	0.648153	0.96275	0.488978	0.887664	0.833185	0.0867512	0.029335	0.191346
649	966	RDN25-1	-0.0164242	0.865397	0.973848	0.681056	0.456816	0.529721	0.588742	0.99316	0.915077	0.979865	0.978758	-0.024885	0.571267	0.844041	0.340625	0.239078	0.145116	0.196621	0.777591	0.646396	0.561655	0.646389	-0.0721063	0.329374	0.730612	0.227217	0.776197	0.129362	0.15894	0.833548	0.947044	0.734985	0.772356	-0.0618338	0.0588909	0.176343	0.0473804	0.510832	0.00572177	0.00962884	0.179936	0.757172	0.0293115	0.0456761	-0.0965689	0.0152391	0.128712
649	986	RDN25-1	0.1265	0.189943	0.703423	0.621784	0.527643	0.477122	0.382635	0.99316	0.929344	0.979865	0.963664	0.041481	0.345148	0.69035	0.523696	0.776045	0.793653	0.947687	0.867048	0.944961	0.957662	0.993031	-0.076214	0.302495	0.710206	0.0623903	0.11862	0.0980397	0.145217	0.647478	0.628663	0.718301	0.755703	0.00973653	0.766336	0.909662	0.137826	0.355123	0.258918	0.462413	0.371114	0.630158	0.517045	0.704885	0.0588299	0.139907	0.474617
649	990	RDN25-1	0.0944037	0.328854	0.820641	0.329716	0.437455	0.731807	0.507615	0.961935	0.911332	0.997721	0.968555	-0.0121602	0.782058	0.931488	0.920809	0.001805	0.149784	0.423448	0.982585	0.0444683	0.568518	0.810088	-0.0122052	0.869031	0.958049	0.947341	0.0276761	0.36368	0.616435	0.996787	0.395286	0.836691	0.929523	-0.0424215	0.195215	0.425008	0.423527	3.20455e-05	0.0100934	0.0728525	0.718547	0.000492488	0.047622	0.221081	0.176757	7.95097e-06	0.000467687
649	1004	RDN25-1	0.00186866	0.984614	0.997128	0.717863	0.40871	0.659391	0.68452	0.995385	0.906079	0.995892	0.981654	0.00738804	0.866528	0.966607	0.55065	0.170508	0.428258	0.466089	0.884225	0.570618	0.824339	0.834424	-0.090301	0.221556	0.637207	0.111271	0.036012	0.0823897	0.0891341	0.757097	0.454998	0.700438	0.695088	-0.0289502	0.376825	0.642808	0.1242	0.0238298	0.0560086	0.0630114	0.343215	0.102161	0.18679	0.198554	0.0909341	0.0223455	0.161771
649	1042	RDN25-1	0.0315428	0.744726	0.945193	0.962904	0.618539	0.988113	0.919287	0.996965	0.942478	0.999908	0.995705	0.0227348	0.604979	0.861275	0.941155	0.305549	0.883749	0.697321	0.983651	0.719518	0.976236	0.919471	0.0320668	0.664789	0.889126	0.94759	0.538534	0.979366	0.90096	0.996787	0.88379	0.999074	0.97412	0.051325	0.116999	0.301089	0.579686	0.522312	0.590871	0.806794	0.820805	0.763229	0.806051	0.920207	0.085177	0.0324138	0.204543
649	1052	RDN25-1	-0.00190992	0.984274	0.997128	0.742719	0.335215	0.671886	0.667544	0.995385	0.892077	0.995892	0.981654	-0.00228815	0.958487	0.99218	0.520603	0.0872364	0.381459	0.369822	0.867048	0.419885	0.79648	0.789973	-0.0793779	0.282807	0.694163	0.170895	0.0359264	0.126515	0.123022	0.801984	0.454998	0.734505	0.74868	0.030917	0.345258	0.611448	0.975887	0.179604	0.792639	0.778926	0.992504	0.423318	0.916031	0.91094	0.101917	0.0104153	0.10365
649	1056	RDN25-1	-0.140336	0.145539	0.63931	0.0646908	0.108198	0.0537528	0.115815	0.740846	0.76232	0.789175	0.824829	-0.0300614	0.493969	0.797162	0.13131	0.30694	0.0851694	0.319796	0.54278	0.720857	0.44039	0.762728	-0.0611136	0.408592	0.78807	0.169064	0.280252	0.13933	0.309021	0.801149	0.763777	0.747223	0.864274	0.0902322	0.00578792	0.0240541	0.376584	0.274603	0.382116	0.0652122	0.680648	0.541377	0.642894	0.203779	0.0323835	0.416755	0.757816
649	1110	RDN25-1	0.0512314	0.596769	0.911096	0.53996	0.917623	0.540662	0.393093	0.99193	0.997597	0.979865	0.963664	-0.00752651	0.864051	0.965502	0.925683	0.436051	0.940843	0.566979	0.982585	0.799545	0.985339	0.880523	-0.0215755	0.770667	0.92287	0.911909	0.476731	0.895923	0.857699	0.996787	0.857528	0.984067	0.966529	0.0453409	0.166194	0.381603	0.193341	0.920928	0.153905	0.0368644	0.462751	0.969989	0.377697	0.132618	0.0400731	0.314881	0.684736
649	1124	RDN25-1	-0.121956	0.206481	0.725105	0.153935	0.518542	0.151129	0.108831	0.851663	0.929344	0.912294	0.801142	-0.0761557	0.0827481	0.34029	0.0574514	0.700313	0.0441131	0.0173693	0.401484	0.920793	0.318487	0.19966	0.0281854	0.703322	0.902985	0.977653	0.350236	0.958682	0.873551	0.996787	0.804107	0.99444	0.970571	-0.0102029	0.755492	0.904745	0.417383	0.423322	0.387583	0.189801	0.711799	0.684499	0.646381	0.436407	-0.0527216	0.185953	0.546902
649	1133	RDN25-1	0.0693228	0.473825	0.876756	0.320128	0.676569	0.510431	0.443782	0.954632	0.948917	0.979865	0.9646	0.0215447	0.624015	0.870154	0.300994	0.963631	0.697979	0.540639	0.740922	0.991533	0.929998	0.869588	0.0261514	0.723828	0.909426	0.460597	0.983233	0.762014	0.659203	0.912592	0.996242	0.96542	0.929523	0.237557	1.89638e-13	3.1709e-12	5.47047e-10	4.17427e-05	1.48615e-09	1.07416e-10	2.87528e-08	0.000606076	3.86694e-08	2.9102e-09	0.024331	0.541817	0.82687
649	1437	RDN25-1	0.0806583	0.404423	0.847498	0.933857	0.460154	0.829764	0.712832	0.995385	0.916125	0.997721	0.981825	0.0299583	0.495452	0.797663	0.432534	0.635472	0.56226	0.785526	0.829103	0.902117	0.888245	0.945654	0.0275328	0.709879	0.90321	0.58451	0.759307	0.692161	0.840745	0.948955	0.941947	0.962956	0.966529	0.146371	7.07107e-06	4.25038e-05	0.0910663	0.00587659	0.0256764	0.00736558	0.278282	0.0338923	0.103652	0.0360579	0.000984159	0.980316	0.992215
649	1449	RDN25-1	0.157682	0.101519	0.569684	0.170329	0.219529	0.284136	0.136681	0.879609	0.891056	0.96429	0.847453	-0.00882342	0.840914	0.955756	0.641495	0.56595	0.241543	0.740697	0.917777	0.872666	0.673474	0.933598	0.0200922	0.786039	0.929474	0.962204	0.943176	0.709376	0.872415	0.996787	0.993943	0.964131	0.970252	0.134632	3.66188e-05	0.000204792	0.00741124	0.0400088	0.0305237	0.000981375	0.0407189	0.150851	0.117792	0.00609705	0.0262667	0.510141	0.814207
649	1450	RDN25-1	0.0626001	0.51785	0.897613	0.453082	0.386779	0.81814	0.508856	0.983998	0.90169	0.997721	0.968555	-0.00881034	0.841147	0.955756	0.901801	0.00694093	0.335819	0.931632	0.979472	0.103773	0.765407	0.989812	0.0252615	0.732864	0.913656	0.618058	0.130729	0.860318	0.704412	0.952173	0.633865	0.971208	0.932143	0.11967	0.000246786	0.00127018	0.00230688	0.498285	0.0411548	0.00130717	0.0147865	0.749566	0.150634	0.00793357	0.15499	9.25936e-05	0.00321056
649	1888	RDN25-1	-0.0627147	0.517082	0.897613	0.349691	0.249617	0.432571	0.448386	0.962515	0.891056	0.979865	0.9646	-0.00719881	0.869916	0.966607	0.437313	0.260007	0.622142	0.660581	0.832797	0.664687	0.903809	0.908904	-0.0192534	0.794768	0.930922	0.509653	0.350469	0.643373	0.66889	0.93466	0.804107	0.943986	0.929548	0.216391	2.32957e-11	2.83159e-10	3.1658e-05	0.0029237	3.37664e-07	1.21994e-07	0.000327144	0.0194289	4.50448e-06	1.72112e-06	0.0615904	0.122218	0.443837
649	2129	RDN25-1	0.098913	0.306172	0.805672	0.703093	0.635447	0.53197	0.560296	0.995385	0.947497	0.979865	0.973203	-0.0402272	0.359938	0.702568	0.0635959	0.00181054	0.129388	0.103129	0.414933	0.0444683	0.533001	0.486858	0.0350442	0.635808	0.879381	0.764265	0.182921	0.9967	0.950641	0.987405	0.705579	0.999972	0.981674	-0.0427532	0.191742	0.420224	0.0215532	0.000277648	0.0489355	0.0331982	0.0973228	0.00282814	0.169569	0.120838	0.149364	0.000166091	0.00501932
649	2133	RDN25-1	0.0621166	0.521094	0.898721	0.712268	0.800153	0.658852	0.584	0.995385	0.985574	0.995892	0.978758	-0.0164249	0.70865	0.900228	0.454729	0.082996	0.501541	0.642079	0.838646	0.412596	0.863163	0.90393	-0.00349115	0.962383	0.989108	0.738307	0.282978	0.794766	0.899598	0.978407	0.763777	0.965422	0.97412	0.0115677	0.724041	0.891081	0.783697	0.142354	0.889323	0.894917	0.926784	0.368679	0.960431	0.957981	0.089326	0.02484	0.171897
649	2142	RDN25-1	0.0275819	0.775875	0.954043	0.831485	0.76092	0.930173	0.591271	0.995385	0.976891	0.997721	0.978758	0.0563167	0.199792	0.551184	0.901949	0.946434	0.690845	0.0897392	0.979472	0.989798	0.92705	0.462047	0.12136	0.0998519	0.452424	0.376522	0.478136	0.28036	0.0582337	0.889191	0.857752	0.818652	0.621395	0.0201476	0.538569	0.778432	0.506213	0.448056	0.679666	0.223796	0.773446	0.705397	0.852332	0.481275	0.0604104	0.129553	0.452439
649	2191	RDN25-1	0.139474	0.148053	0.643386	0.266391	0.131056	0.242966	0.34903	0.944125	0.78239	0.943153	0.954535	-0.010568	0.810009	0.945159	0.512665	0.840763	0.525397	0.258426	0.867048	0.966124	0.87671	0.713155	-0.081078	0.272592	0.686482	0.194639	0.500409	0.195804	0.108586	0.809453	0.871897	0.790649	0.727639	-0.0509847	0.119449	0.305961	0.0891788	0.596124	0.0691886	0.0133867	0.274429	0.806759	0.21828	0.0602149	-0.0228487	0.56672	0.838365
649	2197	RDN25-1	0.0511659	0.597239	0.911096	0.949712	0.19749	0.570826	0.847853	0.996965	0.8664	0.992806	0.995705	-0.0021232	0.961477	0.993446	0.384687	0.00162663	0.926905	0.492076	0.805611	0.0415028	0.985339	0.852011	0.0757604	0.30539	0.71146	0.701833	0.185976	0.296518	0.574095	0.966582	0.705579	0.820226	0.918356	-0.0151404	0.643997	0.85023	0.179366	0.00010941	0.831563	0.228037	0.440037	0.00128903	0.932316	0.486825	0.188264	1.91297e-06	0.000153691
649	2220	RDN25-1	-0.0880494	0.362593	0.82542	0.61207	0.864657	0.647797	0.429616	0.99316	0.995518	0.995892	0.9646	0.00924219	0.833471	0.95246	0.405915	0.195795	0.307929	0.728308	0.816153	0.596233	0.744033	0.927772	-0.0512846	0.488137	0.822238	0.845998	0.830788	0.902216	0.580598	0.989652	0.958869	0.985113	0.921192	0.259725	7.27968e-16	1.75031e-14	1.31905e-11	2.72461e-10	9.5867e-15	1.83577e-12	1.08327e-09	3.11316e-08	8.12705e-13	8.46387e-11	-0.0697373	0.0800425	0.35639
649	2256	RDN25-1	0.135855	0.158966	0.652911	0.168479	0.667075	0.274818	0.290122	0.879609	0.948917	0.964148	0.943026	-0.0208864	0.634652	0.875437	0.792024	0.0692379	0.356096	0.310735	0.954489	0.377319	0.778284	0.755849	0.137749	0.0615094	0.35054	0.075112	0.576273	0.151483	0.163534	0.678331	0.887706	0.765569	0.780088	0.0610415	0.0622157	0.182981	0.127707	0.584424	0.36469	0.40791	0.351061	0.799099	0.626285	0.663324	0.0899511	0.0238431	0.167104
649	2258	RDN25-1	0.00287251	0.976351	0.996313	0.636372	0.647291	0.969839	0.98912	0.99316	0.947996	0.999401	0.996323	0.00114801	0.979165	0.999169	0.377195	0.402469	0.9108	0.94954	0.798122	0.788679	0.985339	0.993326	0.124324	0.0917813	0.428226	0.0358936	0.402012	0.135118	0.125088	0.593261	0.834248	0.744423	0.74868	0.0586901	0.0730054	0.206598	0.0182334	0.903862	0.190007	0.160551	0.0855666	0.960055	0.431915	0.391295	0.0522885	0.189599	0.55269
649	2260	RDN25-1	0.085872	0.374629	0.834437	0.703389	0.599095	0.483462	0.456948	0.995385	0.941893	0.979865	0.9646	-0.0363291	0.408402	0.750362	0.123874	0.00336814	0.308032	0.342689	0.534375	0.0683877	0.744033	0.784391	-0.0596975	0.419557	0.790194	0.193402	0.0193592	0.347981	0.373074	0.809453	0.355833	0.836691	0.890455	-0.0404317	0.217017	0.457945	0.0510044	0.00056237	0.166277	0.190973	0.188523	0.00507872	0.39612	0.43836	0.141953	0.00034773	0.00909065
649	2264	RDN25-1	-0.0687395	0.477563	0.879313	0.459605	0.350559	0.490757	0.372279	0.987606	0.892077	0.979865	0.958984	-0.0428915	0.32898	0.67941	0.34241	0.219995	0.372578	0.186904	0.777591	0.621928	0.791073	0.628918	-0.0632431	0.392427	0.779752	0.381339	0.271021	0.412253	0.278236	0.889191	0.762541	0.863232	0.856568	-0.00967968	0.767661	0.910308	0.68868	0.432236	0.7772	0.414546	0.878995	0.689007	0.905277	0.66895	0.0320628	0.421386	0.760147
649	2266	RDN25-1	0.27895	0.00331096	0.112066	0.0118713	0.0196051	0.00361611	0.00216834	0.384786	0.455948	0.254424	0.149564	-0.0505936	0.249456	0.605979	0.162258	0.165107	0.423652	0.612052	0.59974	0.562778	0.821922	0.892604	0.0450241	0.542822	0.848626	0.801707	0.900633	0.480797	0.368717	0.989652	0.984139	0.892972	0.890455	0.0124929	0.702976	0.879789	0.786616	0.682614	0.558467	0.325537	0.927423	0.848124	0.785361	0.597024	0.0342191	0.390825	0.741577
649	2278	RDN25-1	0.169223	0.0785633	0.534704	0.241641	0.142359	0.193893	0.0954986	0.925971	0.786605	0.925795	0.790816	-0.026596	0.545093	0.829449	0.160284	0.525002	0.194225	0.573278	0.594951	0.853264	0.62552	0.880681	0.0866096	0.241102	0.653999	0.64264	0.389617	0.538386	0.276063	0.953659	0.831775	0.904555	0.856568	0.0871686	0.00768729	0.0310698	0.387787	0.157617	0.214734	0.0263002	0.687655	0.392251	0.463698	0.100607	0.0122614	0.758536	0.924976
649	2280	RDN25-1	0.0467095	0.629591	0.923362	0.917727	0.744263	0.997784	0.998718	0.995385	0.971164	0.999984	0.999478	0.00205278	0.962754	0.99383	0.302701	0.190952	0.373258	0.365391	0.741841	0.591075	0.791705	0.789029	0.0724861	0.326827	0.727902	0.853169	0.913661	0.741006	0.740804	0.989652	0.986765	0.964961	0.943233	0.178462	3.99903e-08	3.1068e-07	0.00577869	0.0642346	0.000740569	0.000569873	0.0326675	0.2097	0.00471238	0.00373473	0.0818273	0.0398936	0.23341
649	2281	RDN25-1	0.199697	0.0373531	0.408774	0.128127	0.0423509	0.231511	0.0960541	0.821265	0.646813	0.939331	0.790816	-0.0329647	0.453191	0.779462	0.152614	0.794525	0.0232739	0.180268	0.584143	0.949255	0.230807	0.616054	0.1853	0.011564	0.134601	0.0788816	0.0182907	0.17516	0.0495939	0.687166	0.350861	0.789553	0.596958	0.263903	2.39879e-16	6.37226e-15	3.71408e-07	6.48191e-08	1.67231e-06	9.8547e-10	7.02202e-06	2.70388e-06	1.91079e-05	2.1751e-08	-0.0170515	0.669007	0.883039
649	2288	RDN25-1	0.14463	0.133491	0.630616	0.319027	0.678131	0.199224	0.363944	0.954632	0.948917	0.928383	0.954535	-0.050632	0.249096	0.605551	0.0853364	0.0132409	0.191286	0.0347229	0.464315	0.157453	0.621384	0.288772	-0.0464554	0.530058	0.846828	0.279143	0.0892831	0.440857	0.205269	0.86612	0.573261	0.870306	0.815135	0.241049	8.18577e-14	1.48972e-12	4.61248e-06	0.00634634	5.56993e-09	6.99664e-07	5.91298e-05	0.036022	1.19006e-07	8.06454e-06	0.100444	0.011586	0.110621
649	2314	RDN25-1	0.0631192	0.514377	0.897613	0.895875	0.809075	0.77372	0.931598	0.995385	0.986201	0.997721	0.995705	-0.0398693	0.364231	0.706582	0.0963165	0.208055	0.13937	0.0551122	0.489593	0.611598	0.557435	0.370575	0.0684919	0.354256	0.751837	0.81578	0.716125	0.660371	0.857447	0.989652	0.93029	0.950414	0.966529	0.0609725	0.0625125	0.18337	0.796652	0.652133	0.492915	0.865345	0.930489	0.837637	0.738529	0.94696	0.0370646	0.352617	0.719793
649	2337	RDN25-1	-0.0369763	0.702666	0.938813	0.489554	0.879726	0.366223	0.473536	0.99193	0.997597	0.979865	0.967168	0.0292443	0.505789	0.803736	0.915431	0.414537	0.60124	0.891007	0.980739	0.789996	0.899084	0.975246	0.130974	0.0755638	0.385534	0.236018	0.078757	0.334201	0.22381	0.837204	0.564716	0.836691	0.836791	0.244979	3.12919e-14	5.99277e-13	1.35906e-06	3.54844e-07	9.29075e-07	3.54643e-08	2.08867e-05	1.13723e-05	1.13563e-05	5.61447e-07	-0.0206313	0.604961	0.850307
649	2340	RDN25-1	0.0586666	0.544542	0.903104	0.638392	0.836042	0.617948	0.814411	0.99316	0.991674	0.995892	0.993411	0.0074889	0.864723	0.965886	0.965791	0.636785	0.995351	0.578358	0.987493	0.902627	0.996109	0.882651	-0.0872061	0.237864	0.649688	0.233802	0.153226	0.228896	0.120316	0.836055	0.670012	0.807577	0.745735	-0.00601855	0.854256	0.947466	0.722447	0.425384	0.728134	0.292887	0.898149	0.684993	0.878172	0.563059	0.0363436	0.362068	0.723033
649	2347	RDN25-1	-0.0580289	0.548932	0.903104	0.61948	0.146607	0.665066	0.455334	0.99316	0.797686	0.995892	0.9646	-0.0440892	0.315641	0.666915	0.483038	0.0193768	0.544128	0.207213	0.85025	0.200482	0.881608	0.659267	0.0768678	0.298355	0.707545	0.307088	0.801216	0.250731	0.452756	0.867306	0.954958	0.815631	0.90041	0.115559	0.00040197	0.00201843	0.00595321	0.745781	0.00106204	0.0114965	0.0335011	0.889964	0.0065211	0.0528195	0.0985209	0.0132888	0.119551
649	2349	RDN25-1	-0.0259267	0.789002	0.954673	0.703096	0.566683	0.932872	0.517603	0.995385	0.937209	0.997721	0.968555	-0.00989111	0.821968	0.947375	0.660233	0.452815	0.881481	0.310911	0.917777	0.807874	0.976138	0.755849	0.131298	0.0748372	0.383381	0.147409	0.267768	0.0590374	0.241885	0.790216	0.760164	0.630692	0.839937	0.138892	2.04681e-05	0.000117665	0.00464458	0.0509156	7.54904e-05	0.0101483	0.0271243	0.180819	0.000581785	0.0476244	0.0359932	0.366718	0.727692
649	2351	RDN25-1	-0.0497447	0.607475	0.915885	0.273715	0.284412	0.560754	0.487861	0.944125	0.891056	0.986055	0.968555	-0.0129004	0.769156	0.927719	0.151844	0.19721	0.651235	0.492575	0.584143	0.59777	0.914854	0.852011	0.139755	0.0577873	0.338847	0.348966	0.388551	0.0977352	0.127896	0.878741	0.830172	0.718301	0.74868	0.0303344	0.354428	0.620673	0.447104	0.503116	0.602041	0.807009	0.733206	0.750817	0.813835	0.920207	0.065847	0.098418	0.398756
649	2416	RDN25-1	0.0349375	0.718352	0.942096	0.587393	0.530489	0.872199	0.92685	0.99316	0.929344	0.997721	0.995705	-0.102594	0.019281	0.131998	0.13025	0.00076621	0.0148664	0.00275873	0.541608	0.0279667	0.174219	0.0631825	-0.0250487	0.735029	0.913656	0.965807	0.140282	0.58188	0.378189	0.996787	0.647122	0.926946	0.890455	0.133498	4.26264e-05	0.000236782	0.000464692	0.553078	0.00353618	0.0204832	0.00353974	0.782323	0.0188746	0.0831993	0.102405	0.0100515	0.100944
649	2417	RDN25-1	0.038243	0.692983	0.937818	0.596815	0.444053	0.958703	0.761832	0.99316	0.911332	0.999401	0.98932	0.016643	0.704962	0.898663	0.15394	0.0878395	0.589538	0.85092	0.584323	0.420478	0.899084	0.963188	-0.0329723	0.65592	0.885444	0.121846	0.0756181	0.333424	0.607869	0.76423	0.564266	0.836691	0.929523	0.19756	1.13088e-09	1.09885e-08	0.016411	0.136366	7.94254e-05	6.89789e-07	0.078701	0.358012	0.000608542	7.98575e-06	0.120419	0.00244618	0.0381882
649	2421	RDN25-1	-0.0784536	0.41743	0.854855	0.160141	0.443735	0.236217	0.411859	0.867734	0.911332	0.939331	0.9646	-0.0616556	0.160344	0.488112	0.0161718	0.280954	0.0368111	0.175242	0.206574	0.688115	0.299503	0.609696	0.104547	0.156706	0.558042	0.648015	0.245093	0.429354	0.203953	0.954328	0.744496	0.869408	0.815135	0.257634	1.25922e-15	2.98409e-14	1.08145e-05	1.06661e-06	2.51906e-08	2.75276e-11	0.0001286	2.83135e-05	4.56557e-07	9.04281e-10	0.00418675	0.916406	0.974918
649	2619	RDN25-1	0.0514475	0.59522	0.911096	0.655026	0.781889	0.787034	0.476323	0.99316	0.980795	0.997721	0.967168	-0.0288055	0.512196	0.806077	0.0183951	0.409983	0.29061	0.874356	0.220741	0.789996	0.724391	0.968313	0.0112428	0.879276	0.961663	0.287932	0.905234	0.872994	0.68171	0.867306	0.984667	0.976062	0.930667	0.226103	2.71964e-12	3.71722e-11	0.0030177	8.77782e-05	2.05506e-07	1.00713e-10	0.018704	0.00106797	2.88807e-06	2.75701e-09	0.0215584	0.588832	0.846992
649	2634	RDN25-1	0.0912824	0.345169	0.821103	0.281128	0.942269	0.479306	0.521094	0.94962	0.997597	0.979865	0.968555	0.0491977	0.262774	0.617904	0.193617	0.572897	0.547873	0.639507	0.639924	0.874317	0.883366	0.90393	-0.0366681	0.620229	0.875858	0.844784	0.164816	0.479515	0.424306	0.989652	0.688611	0.892972	0.90041	-0.0219711	0.502444	0.749189	0.977118	0.046829	0.298834	0.214852	0.992988	0.169048	0.565974	0.465868	0.083513	0.0359645	0.218172
649	2640	RDN25-1	-0.102569	0.288548	0.799161	0.0952035	0.439063	0.14924	0.107922	0.762674	0.911332	0.912294	0.801142	0.046018	0.294915	0.646162	0.64517	0.285299	0.973744	0.764713	0.917777	0.695732	0.991557	0.941518	-0.0520097	0.481999	0.820902	0.132374	0.705287	0.222804	0.15167	0.773946	0.928717	0.798978	0.772356	0.201224	5.4681e-10	5.61119e-09	0.00277873	2.67014e-05	5.80337e-05	0.000225914	0.0173456	0.000427874	0.000463564	0.00160027	-0.0192755	0.628898	0.860442
649	2724	RDN25-1	0.185825	0.0530404	0.464142	0.278984	0.149246	0.0789396	0.101711	0.948116	0.800012	0.859342	0.790816	0.0303661	0.489599	0.796742	0.403963	0.977596	0.661286	0.854431	0.815803	0.995977	0.918274	0.963188	-0.0135224	0.855044	0.951339	0.276854	0.59868	0.780534	0.657687	0.86612	0.89191	0.965422	0.929523	0.244625	3.41435e-14	6.43718e-13	8.95881e-05	4.26062e-05	1.23632e-09	4.11658e-09	0.000834885	0.000611853	3.34954e-08	7.95469e-08	0.0320814	0.421117	0.760087
649	2729	RDN25-1	-0.129172	0.180682	0.686466	0.294237	0.355346	0.111336	0.0728275	0.952625	0.892843	0.912294	0.789221	-0.0264585	0.547174	0.830268	0.914281	0.954228	0.234978	0.107208	0.980658	0.991533	0.667552	0.492641	-0.0196123	0.79103	0.930353	0.989653	0.904862	0.507979	0.357643	0.996787	0.984667	0.895638	0.889201	0.246763	2.01098e-14	4.03913e-13	9.17313e-10	1.13848e-07	3.35113e-08	2.91696e-07	4.46425e-08	4.39991e-06	5.73555e-07	3.7394e-06	-0.029965	0.452419	0.778614
649	2735	RDN25-1	0.0830242	0.390733	0.842878	0.906223	0.0901093	0.462772	0.559463	0.995385	0.74939	0.979865	0.973203	-0.032493	0.459684	0.784716	0.0544823	0.269533	0.414426	0.252543	0.397575	0.675796	0.815866	0.705253	-0.130694	0.0761968	0.385534	0.0131922	0.716853	0.0775994	0.0485672	0.462254	0.930752	0.686637	0.596958	0.00272231	0.933783	0.977712	0.125449	0.0533109	0.890263	0.587626	0.34594	0.186057	0.960431	0.798221	-0.0996802	0.0122377	0.113663
649	2791	RDN25-1	0.00424692	0.965041	0.99535	0.787611	0.282387	0.915972	0.931671	0.995385	0.891056	0.997721	0.995705	0.0314287	0.474525	0.791523	0.30445	0.0189996	0.446452	0.707461	0.744273	0.198712	0.829386	0.920765	-0.0265932	0.719357	0.907141	0.972733	0.324639	0.7998	0.615045	0.996787	0.783459	0.965422	0.929523	0.195214	1.78766e-09	1.68244e-08	6.48923e-07	5.6865e-09	2.65549e-07	1.95781e-06	1.10946e-05	3.47538e-07	3.65373e-06	2.11734e-05	-0.111503	0.0050453	0.0611001
649	2793	RDN25-1	0.13974	0.147274	0.640845	0.260615	0.049612	0.139901	0.362141	0.944125	0.646813	0.912294	0.954535	0.0303864	0.489309	0.796742	0.898237	0.0952975	0.416267	0.722558	0.979022	0.433314	0.815866	0.92403	0.0414657	0.575198	0.859332	0.825785	0.191992	0.514032	0.935469	0.989652	0.705579	0.895638	0.978278	0.209625	9.80845e-11	1.10647e-09	2.13113e-05	8.84867e-08	1.95406e-08	2.17193e-05	0.000229533	3.52338e-06	3.66805e-07	0.000180057	-0.0714705	0.0728045	0.334942
649	2815	RDN25-1	0.0430026	0.65705	0.932919	0.482983	0.761489	0.984528	0.615694	0.99193	0.977001	0.999493	0.978758	-0.0373716	0.395075	0.734771	0.891085	0.43622	0.115787	0.551406	0.97893	0.799545	0.509	0.875989	0.00255319	0.972485	0.993816	0.689949	0.929562	0.626623	0.89246	0.964605	0.990082	0.942067	0.973189	0.225392	3.19339e-12	4.31107e-11	5.71775e-09	3.76488e-05	2.10331e-06	9.76535e-10	2.14661e-07	0.000562165	2.37232e-05	2.17486e-08	0.0102143	0.79789	0.937408
649	2826	RDN25-1	0.097194	0.314695	0.806901	0.913836	0.316423	0.4721	0.657947	0.995385	0.891056	0.979865	0.981654	0.00673756	0.878184	0.968118	0.139493	0.774142	0.728643	0.353129	0.561389	0.944497	0.942998	0.786954	-0.0709059	0.337511	0.73822	0.0541275	0.487196	0.229592	0.116771	0.646776	0.865102	0.807577	0.74448	-0.059226	0.0704209	0.201886	0.00108133	0.361748	0.0357803	0.00402193	0.00749798	0.634077	0.133756	0.0213528	-0.0108069	0.78644	0.935054
649	2843	RDN25-1	0.0224434	0.816815	0.95887	0.991095	0.226927	0.861118	0.92977	0.997931	0.891056	0.997721	0.995705	-0.0638726	0.145808	0.468121	0.103582	0.000385502	0.036539	0.115482	0.504892	0.016308	0.299142	0.502817	-0.0405779	0.583414	0.862552	0.431682	0.0254428	0.306472	0.492046	0.912525	0.392978	0.823526	0.90041	-0.0154212	0.637861	0.848592	0.380693	0.00152737	0.160232	0.456873	0.682444	0.0115675	0.387031	0.70128	0.151894	0.000128031	0.00417559
649	2865	RDN25-1	0.0361208	0.709233	0.940638	0.570423	0.928376	0.788867	0.913037	0.99316	0.997597	0.997721	0.995705	0.0670004	0.127039	0.437728	0.0941487	0.728214	0.24225	0.392273	0.488833	0.930309	0.673474	0.797288	-0.0416117	0.573852	0.859332	0.819024	0.312765	0.52404	0.397057	0.989652	0.775819	0.899127	0.898865	0.00418603	0.898339	0.96342	0.542192	0.43318	0.90788	0.591725	0.799195	0.689519	0.965876	0.801161	0.0458222	0.250406	0.626301
649	2870	RDN25-1	0.0365783	0.705719	0.940413	0.694228	0.715434	0.965485	0.833499	0.995385	0.961719	0.999401	0.994181	0.0672116	0.125843	0.436343	0.849345	0.886909	0.481083	0.289331	0.969543	0.973332	0.85402	0.735888	-0.0231718	0.754223	0.919574	0.21747	0.252474	0.484243	0.625931	0.832214	0.74803	0.893558	0.929523	0.0149313	0.648579	0.853885	0.159744	0.250634	0.664034	0.994751	0.408851	0.517728	0.847873	0.997598	0.0758623	0.0568314	0.29114
649	2880	RDN25-1	0.131698	0.172232	0.671117	0.613746	0.117938	0.329748	0.175346	0.99316	0.778651	0.979865	0.880117	-0.0107232	0.807274	0.944639	0.0920572	0.672577	0.381774	0.916045	0.481582	0.919737	0.79648	0.98484	0.0377869	0.609592	0.871603	0.606142	0.390876	0.950551	0.581823	0.952173	0.832888	0.992802	0.921192	-0.0471749	0.149697	0.356287	0.00430456	0.841266	0.0435817	0.283266	0.0253074	0.934957	0.15709	0.550689	-0.0365462	0.359396	0.719793
649	2921	RDN25-1	0.151063	0.116886	0.602415	0.218839	0.21265	0.184828	0.318183	0.920972	0.890323	0.916894	0.943026	-0.0327231	0.456511	0.782794	0.290062	0.411392	0.321024	0.0903392	0.732019	0.789996	0.755638	0.462047	0.0402634	0.586338	0.863665	0.843679	0.792539	0.766214	0.895925	0.989652	0.951718	0.96542	0.973735	0.0607531	0.0634635	0.185821	0.410498	0.414965	0.266902	0.791878	0.705552	0.67942	0.525013	0.917573	0.0174873	0.661069	0.880534
649	2922	RDN25-1	0.151063	0.116886	0.602415	0.144864	0.685777	0.318152	0.164453	0.843958	0.950818	0.97977	0.878	-0.0268616	0.541084	0.826685	0.612128	0.0268397	0.122072	0.445585	0.910398	0.229009	0.525113	0.824647	-0.0335142	0.650635	0.883145	0.67771	0.101312	0.289751	0.57452	0.960787	0.59797	0.820226	0.918356	0.0936307	0.00418398	0.0180393	0.0357432	0.783867	0.271357	0.0320674	0.14429	0.906292	0.529565	0.117209	0.108064	0.00658525	0.0745424
649	2923	RDN25-1	0.195943	0.0411555	0.419586	0.0897906	0.0757002	0.121421	0.0525126	0.757209	0.718069	0.912294	0.762449	-0.026812	0.541832	0.827442	0.365692	0.585968	0.178526	0.570808	0.791767	0.882211	0.60552	0.880681	0.0122597	0.868452	0.958049	0.906553	0.946866	0.723285	0.886908	0.993093	0.993943	0.964961	0.9709	0.0716419	0.0285707	0.0983404	0.262231	0.219484	0.427637	0.0687017	0.555772	0.478279	0.686287	0.21216	0.00648413	0.870866	0.959208
649	2944	RDN25-1	0.162056	0.0922667	0.555624	0.277951	0.218145	0.271954	0.237093	0.948116	0.891056	0.960613	0.941209	0.0522441	0.234324	0.592189	0.973715	0.71984	0.983578	0.851838	0.98989	0.927451	0.993212	0.963188	0.0209063	0.777591	0.92636	0.7169	0.913151	0.701254	0.777938	0.968644	0.986765	0.964131	0.953502	0.00827707	0.800558	0.922632	0.342766	0.677843	0.278825	0.369858	0.648516	0.848124	0.539647	0.635099	0.0303529	0.446586	0.775796
649	2946	RDN25-1	0.14344	0.13675	0.631274	0.124206	0.933487	0.179569	0.123673	0.816031	0.997597	0.914659	0.838923	-0.0535813	0.222549	0.577399	0.480235	0.00198821	0.221607	0.401219	0.848828	0.0479389	0.655412	0.798187	-0.101283	0.170129	0.576535	0.292399	0.00623876	0.168519	0.256545	0.867306	0.218606	0.779823	0.844052	0.224194	4.18109e-12	5.57591e-11	4.40494e-08	0.081372	2.68285e-08	6.01039e-10	1.11309e-06	0.248081	4.82913e-07	1.423e-08	0.134592	0.000699831	0.0151661
649	2948	RDN25-1	0.0998317	0.301679	0.803295	0.347649	0.543223	0.40323	0.239711	0.961935	0.933691	0.979865	0.941351	-0.0484223	0.27038	0.621859	0.344776	0.175134	0.204858	0.556872	0.778212	0.575509	0.635311	0.878028	-0.0307481	0.677788	0.892754	0.685003	0.451911	0.56503	0.886849	0.961125	0.849584	0.924595	0.9709	0.239348	1.2344e-13	2.16283e-12	5.67583e-08	8.03719e-05	7.61063e-09	1.13318e-11	1.40718e-06	0.000996308	1.56256e-07	4.37309e-10	0.0344263	0.387961	0.739551
649	2959	RDN25-1	-0.0277157	0.774818	0.954043	0.58492	0.123243	0.782521	0.81741	0.99316	0.778682	0.997721	0.993411	-0.031139	0.47861	0.791692	0.262304	0.00541235	0.525994	0.583988	0.70672	0.0906117	0.87671	0.886892	0.0868073	0.240025	0.651808	0.478524	0.54944	0.274053	0.246334	0.922066	0.88379	0.815631	0.842519	0.219041	1.30956e-11	1.64645e-10	1.38865e-05	0.115231	2.18123e-08	5.17641e-09	0.000156626	0.314788	4.03682e-07	9.78676e-08	0.138022	0.00050735	0.0119372
649	2975	RDN25-1	-0.124045	0.198756	0.718556	0.0444411	0.113254	0.113584	0.182715	0.706629	0.769123	0.912294	0.891563	-0.0835542	0.0569004	0.277674	0.00175086	0.033102	0.0155054	0.0541024	0.0484344	0.260009	0.17794	0.367938	0.135757	0.0653984	0.359637	0.524357	0.298717	0.207961	0.110502	0.93919	0.766773	0.795318	0.731487	0.0492344	0.132692	0.328885	0.427379	0.958862	0.756448	0.324347	0.722171	0.985101	0.895874	0.59649	0.0464983	0.243477	0.618342
650	663	RDN25-1	0.0694342	0.473113	0.876756	0.634863	0.605296	0.972986	0.918612	0.99316	0.941893	0.999477	0.995705	0.106491	0.0151222	0.111189	0.106637	0.761945	0.413207	0.331663	0.507403	0.939208	0.815104	0.776803	-0.0310935	0.674374	0.891616	0.530683	0.0709343	0.21935	0.251519	0.93919	0.54828	0.79846	0.842519	0.264817	1.87696e-16	5.19554e-15	1.68626e-08	0.00607645	2.34958e-07	4.69803e-08	5.1529e-07	0.0348666	3.26703e-06	7.17815e-07	0.124764	0.00168888	0.0288331
650	776	RDN25-1	0.0816247	0.398797	0.843207	0.193874	0.477089	0.596124	0.460116	0.905288	0.919699	0.995738	0.9646	-0.0838137	0.0561321	0.275148	0.570434	0.145706	0.0251485	0.0655224	0.886189	0.530738	0.242089	0.394938	-0.00019154	0.997935	0.999756	0.51399	0.95278	0.72483	0.931353	0.938642	0.994798	0.964961	0.978278	0.0912526	0.0052562	0.0220841	0.00112837	0.103467	0.10775	0.0287738	0.00774363	0.292839	0.297757	0.107411	0.00494082	0.901421	0.967823
650	805	RDN25-1	0.00833273	0.931471	0.991106	0.675914	0.555083	0.580224	0.442819	0.99316	0.935373	0.995325	0.9646	0.0968431	0.0272276	0.170835	0.399957	0.682475	0.517053	0.828373	0.812906	0.920051	0.872994	0.959634	0.00692397	0.925475	0.97772	0.582072	0.451815	0.464257	0.312067	0.948068	0.849584	0.881656	0.864274	0.296223	2.2611e-20	1.14586e-18	1.24414e-08	1.14866e-05	1.36353e-09	1.73846e-08	3.92789e-07	0.000212583	3.58337e-08	2.92863e-07	0.0720107	0.0706612	0.331265
650	807	RDN25-1	-0.00329826	0.972847	0.996313	0.968012	0.937816	0.938108	0.902254	0.996965	0.997597	0.997721	0.995705	0.0239443	0.585906	0.849835	0.559158	0.758312	0.698559	0.764447	0.8857	0.937368	0.929998	0.941518	0.165826	0.0240813	0.210408	0.0322596	0.0612306	0.0397226	0.0444667	0.578173	0.53998	0.571418	0.580699	0.227624	1.92509e-12	2.68697e-11	7.81997e-08	2.03303e-05	1.06625e-08	1.01351e-08	1.86826e-06	0.000340307	2.10685e-07	1.78974e-07	0.00513597	0.897548	0.966816
650	817	RDN25-1	0.0335637	0.728987	0.944643	0.720889	0.240978	0.788317	0.898668	0.995385	0.891056	0.997721	0.995705	0.0491944	0.262806	0.617904	0.325805	0.0198369	0.813399	0.560638	0.771366	0.201152	0.958216	0.879362	0.0560721	0.448397	0.799685	0.464283	0.0849242	0.950869	0.651732	0.912592	0.573261	0.992802	0.929523	0.305616	1.21043e-21	7.11989e-20	7.39726e-13	1.45915e-14	1.39556e-10	2.99928e-14	8.1e-11	3.48605e-12	4.89003e-09	2.1303e-12	-0.0929193	0.0195679	0.147463
650	867	RDN25-1	0.167027	0.0825774	0.537112	0.337569	0.0496647	0.141939	0.164457	0.961935	0.646813	0.912294	0.878	-0.0400999	0.361461	0.703696	0.0430127	0.954665	0.239274	0.1722	0.358566	0.991533	0.673474	0.602587	0.0577697	0.434755	0.797218	0.893718	0.241886	0.61975	0.695556	0.993093	0.741827	0.940295	0.932143	0.0639293	0.0508016	0.158317	0.915448	0.0429527	0.252253	0.340993	0.970863	0.160295	0.508995	0.608784	-0.0435696	0.274479	0.649045
650	876	RDN25-1	0.272044	0.00421434	0.134777	0.025194	0.00932726	0.0695441	0.0830862	0.551748	0.34524	0.847002	0.789302	0.0972786	0.02654	0.16812	0.337364	0.103357	0.937219	0.919001	0.777591	0.454273	0.985339	0.985001	0.0589929	0.425076	0.791968	0.872668	0.481127	0.661944	0.580207	0.990637	0.860356	0.951109	0.921192	0.254082	3.15932e-15	7.07946e-14	1.57323e-06	8.48898e-07	2.85477e-05	5.1822e-05	2.36255e-05	2.3733e-05	0.000243583	0.000413946	-0.00199829	0.960045	0.984106
650	898	RDN25-1	0.0703125	0.46752	0.876756	0.645375	0.755284	0.822979	0.59891	0.99316	0.975684	0.997721	0.978758	-0.0435067	0.322083	0.670567	0.219611	0.189243	0.0677359	0.219503	0.668873	0.589319	0.3872	0.666113	0.0324806	0.66073	0.887258	0.902674	0.960976	0.848844	0.842639	0.993093	0.995694	0.967816	0.966529	0.188142	6.87328e-09	5.95805e-08	0.000162621	0.00384508	0.000320217	7.87697e-06	0.00136539	0.0242906	0.00220874	7.34067e-05	0.0367163	0.357163	0.719793
650	908	RDN25-1	0.017006	0.860676	0.972245	0.836363	0.694072	0.953355	0.797333	0.995385	0.953894	0.998599	0.98932	0.0309371	0.481467	0.793769	0.888107	0.640131	0.689663	0.803961	0.97893	0.90534	0.92705	0.951716	0.0121512	0.869605	0.958049	0.746799	0.584619	0.988706	0.693601	0.980159	0.887706	0.999972	0.932074	0.174715	7.71068e-08	5.82545e-07	0.001938	0.0277629	3.05707e-05	0.000594578	0.0127009	0.114718	0.000258328	0.00388695	0.059461	0.135698	0.466587
650	960	RDN25-1	0.0709128	0.463717	0.875851	0.541229	0.567125	0.546321	0.769532	0.99193	0.937209	0.983595	0.98932	-0.0501534	0.253604	0.61019	0.284266	0.331636	0.23212	0.0631966	0.727034	0.734615	0.664177	0.394491	-0.0491187	0.506717	0.83498	0.488467	0.501027	0.459279	0.250938	0.924568	0.871897	0.880339	0.842519	0.0321363	0.326558	0.596806	0.578508	0.665482	0.566597	0.815755	0.820805	0.84243	0.790348	0.922463	0.00916109	0.818346	0.942859
650	966	RDN25-1	0.0470663	0.626973	0.923223	0.71913	0.189495	0.829842	0.871118	0.995385	0.861577	0.997721	0.995705	0.0464991	0.28989	0.640012	0.493008	0.0208468	0.651548	0.728295	0.858315	0.206025	0.914854	0.927772	0.0078261	0.915799	0.973111	0.98216	0.236621	0.439045	0.47835	0.996787	0.741617	0.870306	0.90041	-0.062144	0.0576301	0.174101	0.106467	0.540696	0.000942169	0.0011936	0.308483	0.773937	0.00585348	0.00732894	-0.0944656	0.0176178	0.139005
650	986	RDN25-1	0.104208	0.280874	0.7975	0.560069	0.556947	0.658304	0.386523	0.99316	0.935373	0.995892	0.963664	-0.00245768	0.955414	0.990753	0.388807	0.476354	0.214828	0.701361	0.805643	0.822976	0.653274	0.919471	-0.223157	0.00226344	0.0539562	0.000909114	0.00198261	0.000295499	0.00198479	0.187452	0.148866	0.0776571	0.259916	0.00537535	0.869684	0.954277	0.386857	0.501781	0.173468	0.776366	0.687655	0.750817	0.404592	0.909627	0.0410623	0.303075	0.674875
650	990	RDN25-1	0.101475	0.293749	0.801388	0.539058	0.802591	0.365825	0.312708	0.99193	0.985804	0.979865	0.943026	-0.127739	0.0035245	0.0359718	0.00199316	0.000886962	0.00570003	0.00956923	0.0519245	0.0296566	0.100492	0.135935	0.00226138	0.975629	0.994652	0.662854	0.402641	0.927731	0.967156	0.959472	0.834248	0.988048	0.987797	0.010713	0.743685	0.900307	0.542031	0.228043	0.974373	0.763359	0.799195	0.486598	0.991916	0.903513	0.0746594	0.0608861	0.30353
650	1004	RDN25-1	0.104927	0.277547	0.794992	0.267232	0.913226	0.314886	0.416225	0.944125	0.997597	0.97977	0.9646	-0.0782127	0.0747553	0.324511	0.205203	0.00492864	0.104301	0.0402596	0.650911	0.0863498	0.490316	0.316426	-0.0402194	0.586747	0.863665	0.713119	0.122719	0.587876	0.425132	0.968644	0.628663	0.930686	0.90041	-0.0306264	0.349813	0.616365	0.646539	0.0195128	0.401868	0.171034	0.860306	0.087078	0.659655	0.407504	0.0932624	0.0191197	0.14529
650	1042	RDN25-1	0.0301151	0.755909	0.949436	0.879478	0.928243	0.871323	0.984447	0.995385	0.997597	0.997721	0.995836	-0.00546253	0.901105	0.975031	0.339581	0.458519	0.702656	0.445013	0.777591	0.811987	0.932145	0.824168	0.0792677	0.283479	0.694775	0.681446	0.647962	0.405242	0.547624	0.960787	0.910126	0.855403	0.91261	0.0500923	0.126065	0.317344	0.92449	0.846763	0.35706	0.64256	0.974735	0.936965	0.618559	0.832666	0.0398392	0.317717	0.68717
650	1052	RDN25-1	-0.00714104	0.941252	0.994477	0.677982	0.481204	0.654075	0.603304	0.99316	0.920382	0.995892	0.978758	-0.0959321	0.0287155	0.175489	0.0139067	0.00688079	0.00684787	0.0038938	0.18458	0.103773	0.111088	0.0818633	0.014268	0.847147	0.949519	0.789229	0.527669	0.7581	0.688906	0.989652	0.883318	0.964961	0.932074	-0.0242179	0.459754	0.714354	0.175503	0.079493	0.113281	0.0714834	0.43635	0.244051	0.307862	0.218398	0.0688991	0.0837467	0.366837
650	1056	RDN25-1	-0.0161586	0.867554	0.974334	0.478465	0.96478	0.418989	0.60391	0.99193	0.997597	0.979865	0.978758	-0.0420721	0.338312	0.684941	0.0637318	0.729238	0.0295905	0.109346	0.414933	0.930309	0.271237	0.493264	0.0765904	0.300107	0.708248	0.815128	0.259768	0.896078	0.610638	0.989652	0.753944	0.984067	0.929523	0.0656742	0.0447949	0.142702	0.855271	0.102925	0.987211	0.453681	0.952395	0.292127	0.994782	0.698052	-0.0209306	0.599732	0.849855
650	1110	RDN25-1	0.0871551	0.367507	0.827457	0.121106	0.727337	0.167018	0.236932	0.81553	0.964757	0.914659	0.941209	-0.0785548	0.073489	0.321478	0.930819	0.0357239	0.617297	0.353339	0.982585	0.268609	0.899256	0.786954	-0.0393293	0.595061	0.870092	0.670907	0.304317	0.855137	0.936291	0.959472	0.766773	0.968664	0.978748	-0.00309707	0.924693	0.97287	0.111056	0.320832	0.201526	0.440422	0.317235	0.593448	0.446664	0.688127	0.0496411	0.213034	0.586245
650	1124	RDN25-1	-0.0458475	0.635933	0.924673	0.276727	0.653351	0.540742	0.337878	0.946924	0.947996	0.979865	0.949785	-0.112531	0.0102261	0.0833811	0.000798769	0.0584791	0.00934985	0.00081266	0.0279184	0.342279	0.130415	0.025731	-0.0863017	0.242785	0.65517	0.0594663	0.303451	0.192468	0.0790232	0.647478	0.766773	0.790649	0.681691	-0.001123	0.972658	0.992831	0.123882	0.943062	0.655029	0.173685	0.342868	0.978046	0.847873	0.410819	0.00267409	0.94655	0.980735
650	1133	RDN25-1	0.1103	0.253545	0.769276	0.390102	0.722938	0.3367	0.41785	0.975792	0.96306	0.979865	0.9646	-0.00760225	0.862696	0.965502	0.591688	0.190584	0.685381	0.466109	0.898312	0.590804	0.924632	0.834424	0.07488	0.311061	0.717832	0.510266	0.976082	0.430222	0.552336	0.935131	0.996242	0.869408	0.913492	0.271107	3.37637e-17	1.14657e-15	8.04136e-09	0.000109761	2.27141e-11	1.2572e-10	2.85577e-07	0.00128903	9.94876e-10	3.37136e-09	0.0722956	0.0695518	0.328229
650	1437	RDN25-1	0.123011	0.202554	0.722091	0.556933	0.402883	0.637776	0.436934	0.99316	0.903623	0.995892	0.9646	0.0228637	0.602934	0.860141	0.461674	0.865749	0.290937	0.660499	0.843422	0.967482	0.724391	0.908904	0.134936	0.0670605	0.363624	0.369406	0.236689	0.446588	0.246073	0.889191	0.741617	0.870306	0.842519	0.173276	9.88499e-08	7.40026e-07	0.0114613	0.00763249	0.0121852	0.000773907	0.058714	0.0421391	0.0558861	0.00494848	0.033192	0.405212	0.752831
650	1449	RDN25-1	0.16266	0.0910448	0.555373	0.159345	0.325623	0.223675	0.299524	0.865206	0.891392	0.939006	0.943026	0.00787954	0.85774	0.96397	0.857032	0.413775	0.522094	0.303752	0.96959	0.789996	0.87671	0.748134	0.0614808	0.405777	0.786253	0.590117	0.965854	0.783383	0.968713	0.952173	0.995694	0.965422	0.98787	0.178959	3.66162e-08	2.87176e-07	0.000244096	0.0206297	0.000378429	0.0016183	0.00196775	0.090812	0.00255003	0.00953561	0.0577836	0.147103	0.487973
650	1450	RDN25-1	0.0717947	0.458163	0.870707	0.41467	0.653089	0.588474	0.745726	0.978595	0.947996	0.995325	0.986029	-0.0230257	0.600367	0.859083	0.852458	0.0188887	0.426336	0.208093	0.96959	0.198558	0.823989	0.660247	0.0472729	0.522836	0.842987	0.460006	0.398334	0.698366	0.914883	0.912525	0.834248	0.964131	0.976414	0.212945	4.87389e-11	5.673e-10	2.61336e-07	0.0717218	4.93979e-07	4.95309e-06	5.1253e-06	0.226001	6.30182e-06	4.75062e-05	0.119931	0.00254811	0.039406
650	1888	RDN25-1	-0.14017	0.146021	0.639619	0.135575	0.197681	0.134741	0.123577	0.831806	0.8664	0.912294	0.838923	0.0207102	0.637512	0.876621	0.905389	0.712318	0.856615	0.919082	0.979565	0.927107	0.966143	0.985001	0.0164894	0.82371	0.940584	0.97878	0.832571	0.951738	0.99214	0.996787	0.959647	0.992921	0.997875	0.270471	4.02452e-17	1.31255e-15	3.46432e-09	1.50699e-07	2.18904e-11	1.61298e-11	1.44512e-07	5.578e-06	9.75052e-10	5.43451e-10	-0.00183209	0.963366	0.985068
650	2129	RDN25-1	0.0217933	0.822032	0.960697	0.752078	0.270657	0.796509	0.655448	0.995385	0.891056	0.997721	0.981654	-0.0624885	0.154759	0.482461	0.029281	0.000875761	0.0264309	0.00832367	0.288543	0.0296566	0.252584	0.124998	0.130674	0.0762415	0.385534	0.347383	0.913082	0.292558	0.414714	0.878741	0.986765	0.820226	0.90041	-0.0615498	0.0600656	0.178409	0.00898951	0.000139421	0.00568673	0.00090644	0.0477261	0.00157931	0.0292709	0.00569886	0.139961	0.000421593	0.0102603
650	2133	RDN25-1	0.066647	0.491101	0.889035	0.422082	0.683095	0.615757	0.749164	0.983968	0.949593	0.995892	0.986501	-0.0558106	0.203869	0.5558	0.468333	0.0063852	0.152587	0.0671578	0.847789	0.101265	0.573675	0.398388	0.0863432	0.242557	0.65517	0.205366	0.778996	0.368997	0.505756	0.821718	0.947044	0.836691	0.903493	-0.0636714	0.0517441	0.160646	0.292157	0.00102024	0.0459326	0.0116709	0.591973	0.00830093	0.16263	0.0534342	0.110429	0.00548721	0.0654284
650	2142	RDN25-1	0.101126	0.295421	0.801388	0.305418	0.954294	0.515161	0.425263	0.952625	0.997597	0.979865	0.9646	0.0403829	0.35808	0.700841	0.39606	0.369469	0.913444	0.682472	0.808111	0.768776	0.985339	0.917676	0.14543	0.0482485	0.305049	0.0631696	0.554761	0.15886	0.108849	0.647478	0.88379	0.778329	0.727639	-0.00852972	0.794605	0.920954	0.941322	0.0508721	0.272988	0.458193	0.979233	0.180819	0.531811	0.702526	0.0949895	0.0169969	0.135811
650	2191	RDN25-1	0.0742282	0.443028	0.868663	0.638062	0.419096	0.292559	0.549713	0.99316	0.908276	0.971782	0.970502	-0.0367148	0.40344	0.743666	0.248291	0.697758	0.942965	0.307691	0.69638	0.920793	0.985339	0.752196	-0.0586705	0.427615	0.792663	0.302959	0.597598	0.746539	0.359016	0.867306	0.891035	0.964961	0.890455	-0.0513971	0.116484	0.300234	0.0844651	0.469481	0.645159	0.094739	0.265838	0.722774	0.841846	0.271014	-0.0129867	0.744736	0.919131
650	2197	RDN25-1	0.072016	0.456775	0.870707	0.743964	0.402363	0.551945	0.796584	0.995385	0.903623	0.983595	0.98932	0.020644	0.638589	0.876621	0.745203	0.020182	0.852436	0.607833	0.939954	0.201666	0.965496	0.892144	0.116412	0.114562	0.484426	0.334471	0.597753	0.18214	0.366638	0.876235	0.891035	0.789876	0.890455	0.0293508	0.370256	0.636878	0.843845	0.0121559	0.65041	0.670334	0.952068	0.0613163	0.844087	0.848838	0.161254	4.71594e-05	0.002039
650	2220	RDN25-1	-0.0822703	0.395065	0.843013	0.870424	0.45693	0.531798	0.465408	0.995385	0.915077	0.979865	0.9646	-0.0151907	0.729653	0.90903	0.350007	0.82958	0.945863	0.885731	0.783936	0.961991	0.985339	0.972334	-0.0305098	0.680148	0.892754	0.668641	0.742398	0.880051	0.775965	0.959472	0.939398	0.980404	0.953284	0.268353	7.1952e-17	2.19454e-15	2.03118e-14	1.86303e-07	1.38122e-13	3.04581e-13	4.44828e-12	6.52805e-06	9.81041e-12	1.63355e-11	-0.0020319	0.959374	0.984106
650	2256	RDN25-1	0.0612858	0.526694	0.901809	0.806946	0.786085	0.494239	0.678878	0.995385	0.981846	0.979865	0.981654	0.0287899	0.512424	0.806077	0.894745	0.311293	0.454873	0.845389	0.97893	0.72718	0.838129	0.963059	-0.0316029	0.66935	0.890485	0.408255	0.158168	0.769954	0.518466	0.900743	0.673686	0.96542	0.905631	0.106331	0.00113586	0.00530711	0.111714	0.763003	0.00370362	0.0242088	0.318235	0.895349	0.0197027	0.0946	0.0904558	0.0230637	0.164441
650	2258	RDN25-1	-0.0678016	0.483606	0.884788	0.527967	0.226458	0.370494	0.305213	0.99193	0.891056	0.979865	0.943026	-0.052541	0.231672	0.590199	0.348803	0.0589967	0.126674	0.0701282	0.782796	0.343016	0.531787	0.405048	-0.0445851	0.546766	0.848922	0.603345	0.214981	0.388746	0.302673	0.952173	0.717715	0.850645	0.864274	0.109667	0.000787272	0.00380246	0.0116672	0.37411	0.0292759	0.0580566	0.0596523	0.645119	0.114728	0.188361	0.0627749	0.115184	0.431622
650	2260	RDN25-1	0.146617	0.12818	0.620955	0.389223	0.616647	0.346178	0.238712	0.975792	0.942478	0.979865	0.941351	-0.0659881	0.132896	0.447479	0.0210641	0.00902502	0.0184497	0.0565891	0.24321	0.122256	0.19953	0.375124	-0.0218157	0.768185	0.922831	0.328218	0.183116	0.354523	0.529198	0.868392	0.705579	0.836691	0.91261	-0.0574578	0.0792441	0.219353	0.00946099	0.00448621	0.00605064	0.0282065	0.049727	0.0277406	0.030816	0.105744	0.0932886	0.0190858	0.14529
650	2264	RDN25-1	-0.0210579	0.827943	0.960697	0.499673	0.717425	0.528004	0.799474	0.99193	0.962235	0.979865	0.98932	-0.0323831	0.461205	0.784716	0.129207	0.409207	0.128536	0.449514	0.541358	0.789996	0.533001	0.824947	-0.00171113	0.981558	0.995149	0.532738	0.819518	0.568532	0.933993	0.93919	0.95856	0.925464	0.978278	-0.0458315	0.161653	0.374461	0.0327022	0.229186	0.0245139	0.19199	0.134704	0.488484	0.100239	0.439759	0.0180625	0.650649	0.874077
650	2266	RDN25-1	0.0633511	0.51283	0.897276	0.563941	0.603057	0.721008	0.535835	0.99316	0.941893	0.997721	0.968555	-0.0397719	0.365405	0.708026	0.422578	0.441959	0.180803	0.41403	0.823608	0.803498	0.609363	0.805214	0.0573997	0.437708	0.797218	0.507547	0.562106	0.699809	0.468337	0.93466	0.88379	0.964131	0.90041	-0.00182834	0.9555	0.986219	0.907399	0.864893	0.468415	0.954458	0.967009	0.945272	0.71876	0.985973	0.00721742	0.856413	0.953693
650	2278	RDN25-1	0.114722	0.234893	0.752218	0.243693	0.721167	0.409899	0.240302	0.925971	0.96306	0.979865	0.941351	0.101776	0.020271	0.136271	0.0441043	0.676804	0.154046	0.0304335	0.358566	0.920051	0.574875	0.266682	0.065822	0.373373	0.762486	0.377341	0.9015	0.659382	0.371978	0.889191	0.984139	0.950041	0.890455	0.0506507	0.121893	0.310529	0.20155	0.625469	0.62051	0.156424	0.473346	0.821456	0.824002	0.384419	0.0764947	0.0547911	0.283339
650	2280	RDN25-1	0.00123695	0.989815	0.997128	0.345105	0.653016	0.458791	0.645286	0.961935	0.947996	0.979865	0.981654	0.0066749	0.879308	0.968372	0.0842726	0.480183	0.158981	0.399603	0.464241	0.824784	0.577074	0.798187	0.12312	0.0949932	0.435805	0.767002	0.393813	0.554007	0.336527	0.988079	0.834248	0.916046	0.882627	0.199438	7.80669e-10	7.76895e-09	0.0212132	0.0041726	0.00160676	7.3022e-05	0.0962398	0.0260466	0.00934194	0.000564417	0.0497997	0.211574	0.584328
650	2281	RDN25-1	0.0833901	0.388641	0.842701	0.957968	0.36236	0.89951	0.518991	0.996965	0.892843	0.997721	0.968555	0.0160804	0.714492	0.902317	0.17486	0.612447	0.106932	0.970311	0.619055	0.889724	0.492431	0.996021	0.171539	0.0195589	0.182076	0.3026	0.0299505	0.331969	0.0484064	0.867306	0.413016	0.836691	0.596958	0.277766	5.22688e-18	2.02557e-16	1.05202e-05	1.645e-08	1.97802e-06	5.82388e-12	0.000126243	8.00568e-07	2.25032e-05	2.41253e-10	-0.01489	0.708916	0.903037
650	2288	RDN25-1	0.143611	0.13628	0.631274	0.458743	0.999243	0.352372	0.379712	0.987606	0.999839	0.979865	0.963664	0.0192834	0.66087	0.882709	0.370584	0.0402229	0.54331	0.465869	0.794731	0.289093	0.880825	0.834424	0.0691019	0.349977	0.747616	0.982838	0.383695	0.804248	0.858277	0.996787	0.826037	0.965422	0.966529	0.228482	1.5826e-12	2.21833e-11	0.000208329	0.0983585	4.02965e-06	4.91054e-06	0.00170557	0.281882	4.25298e-05	4.74445e-05	0.143711	0.000292735	0.00796917
650	2314	RDN25-1	0.154165	0.109474	0.596047	0.347556	0.162575	0.364008	0.170011	0.961935	0.821376	0.979865	0.880117	-0.0617446	0.15974	0.487659	0.0264464	0.278521	0.0125573	0.115176	0.268344	0.684707	0.157146	0.502817	0.0338208	0.647652	0.882975	0.771142	0.734436	0.715578	0.817515	0.989048	0.935578	0.964473	0.963473	0.0310927	0.342521	0.609786	0.551973	0.615901	0.426525	0.691166	0.802315	0.81582	0.685571	0.863915	0.00443183	0.911532	0.972971
650	2337	RDN25-1	0.176766	0.0659555	0.503151	0.152537	0.174723	0.151046	0.192561	0.849015	0.834859	0.912294	0.903663	0.112013	0.0105823	0.0856465	0.123694	0.187587	0.106374	0.176222	0.534375	0.58911	0.491304	0.609696	0.0406348	0.582886	0.862552	0.892925	0.919676	0.912415	0.946362	0.993093	0.9892	0.985189	0.981274	0.2197	1.13327e-11	1.43577e-10	1.36273e-05	0.000317474	1.42494e-06	4.9339e-06	0.000154364	0.00318443	1.64967e-05	4.74956e-05	0.0319061	0.42366	0.761282
650	2340	RDN25-1	0.0842632	0.383676	0.841992	0.512221	0.513748	0.484696	0.580396	0.99193	0.928518	0.979865	0.978758	-0.0526352	0.230835	0.589421	0.200298	0.276387	0.187331	0.100261	0.645354	0.682015	0.616975	0.48487	-0.0532914	0.471254	0.815793	0.39432	0.438088	0.401264	0.300335	0.899273	0.84159	0.853174	0.864274	0.00898883	0.783816	0.915564	0.871069	0.92691	0.918003	0.621381	0.957682	0.971438	0.971221	0.819773	0.0138651	0.72813	0.912003
650	2347	RDN25-1	-0.107639	0.26525	0.783616	0.23355	0.0720601	0.175826	0.182343	0.922707	0.714882	0.914659	0.891563	0.0185976	0.672217	0.883521	0.961364	0.267429	0.815437	0.852557	0.987493	0.675105	0.958216	0.963188	-0.053019	0.473527	0.815793	0.397695	0.107571	0.292411	0.304509	0.900743	0.609906	0.820226	0.864274	0.122939	0.000165581	0.000869892	0.0156948	0.484585	0.0187223	0.0136139	0.0763814	0.736083	0.0797444	0.0607632	0.0861906	0.0304015	0.195382
650	2349	RDN25-1	-0.0330001	0.733365	0.945193	0.669412	0.864783	0.68813	0.552684	0.99316	0.995518	0.997721	0.971173	-0.0148889	0.734821	0.911676	0.62443	0.996244	0.646335	0.389416	0.91474	0.999856	0.914701	0.797288	-0.00701451	0.924504	0.97772	0.821122	0.93024	0.849553	0.661448	0.989652	0.990146	0.967816	0.929523	0.161577	6.90356e-07	4.6033e-06	0.000664481	0.000835614	9.42033e-05	0.000482294	0.00481062	0.00710677	0.000711397	0.00320068	-0.0146011	0.714315	0.904634
650	2351	RDN25-1	0.161259	0.0939026	0.560377	0.43404	0.276322	0.216663	0.146977	0.983998	0.891056	0.935424	0.86026	0.0102309	0.815959	0.947375	0.187023	0.569724	0.598924	0.922892	0.630931	0.873532	0.899084	0.985902	0.107623	0.144798	0.537124	0.742512	0.466916	0.365678	0.237084	0.978407	0.855214	0.836691	0.839759	-0.0148732	0.649856	0.854201	0.0309224	0.260179	0.195913	0.441868	0.129196	0.529495	0.43855	0.689019	0.0449569	0.259474	0.635748
650	2416	RDN25-1	-0.0053303	0.956132	0.99535	0.784851	0.464314	0.842167	0.772211	0.995385	0.91719	0.997721	0.98932	-0.00639396	0.884351	0.969725	0.610986	0.189751	0.667768	0.534691	0.910171	0.589439	0.919756	0.867388	0.073221	0.321933	0.726312	0.189621	0.996055	0.460951	0.531841	0.809453	0.997698	0.880339	0.91261	0.119435	0.000253882	0.00130263	0.000553427	0.38457	0.00816756	0.0135768	0.00413184	0.655725	0.0398028	0.0607632	0.0736472	0.0644809	0.312813
650	2417	RDN25-1	-0.104009	0.2818	0.7975	0.196639	0.0592526	0.186295	0.21436	0.905288	0.665452	0.916894	0.923887	0.047883	0.275758	0.626417	0.740058	0.398468	0.728894	0.599047	0.938192	0.787765	0.942998	0.891498	0.0370795	0.616308	0.875329	0.931435	0.471214	0.934902	0.84843	0.996787	0.855214	0.988746	0.966529	0.247724	1.58236e-14	3.23744e-13	5.54305e-07	0.00389947	2.12412e-08	2.74388e-09	9.71143e-06	0.0245163	3.95899e-07	5.46281e-08	0.0992169	0.0126486	0.116381
650	2421	RDN25-1	-0.222633	0.0199737	0.308304	0.0104405	0.0446283	0.0118979	0.0218213	0.384786	0.646813	0.427378	0.584873	-0.0501432	0.2537	0.61019	0.0927545	0.503923	0.105581	0.244036	0.482691	0.839233	0.491304	0.697511	0.101348	0.169852	0.576535	0.451767	0.20022	0.368439	0.229485	0.912525	0.709245	0.836691	0.83762	0.290042	1.46405e-19	6.43011e-18	6.53176e-09	6.95014e-09	1.44221e-11	6.11897e-14	2.38409e-07	3.88616e-07	6.64935e-10	3.92211e-12	-0.00932286	0.815196	0.942607
650	2619	RDN25-1	0.207398	0.0304702	0.370364	0.145852	0.111212	0.0725173	0.0368721	0.844274	0.76667	0.847002	0.677322	0.0396879	0.366419	0.70874	0.719841	0.981042	0.798591	0.395504	0.935933	0.996333	0.958216	0.798163	-0.0924655	0.210633	0.622824	0.0631459	0.130716	0.130306	0.249444	0.647478	0.633865	0.734985	0.842519	0.190404	4.49229e-09	3.95658e-08	0.002665	0.00365976	2.96389e-05	5.24626e-07	0.0168356	0.0232315	0.000252075	6.32439e-06	0.0382372	0.337582	0.70673
650	2634	RDN25-1	-0.00244512	0.979869	0.997128	0.90347	0.29045	0.96938	0.899931	0.995385	0.891056	0.999401	0.995705	0.0483458	0.271139	0.621958	0.477674	0.29931	0.272304	0.439562	0.848828	0.713782	0.706431	0.821621	-0.0297395	0.687796	0.895433	0.624829	0.102336	0.76762	0.610312	0.952173	0.59797	0.96542	0.929523	-0.0849031	0.00943236	0.0375698	0.0323404	0.000211768	0.0472925	0.0139637	0.133692	0.0022261	0.165713	0.0615713	0.111378	0.00509505	0.0614765
650	2640	RDN25-1	-0.0736706	0.446471	0.868663	0.157391	0.31284	0.164456	0.212193	0.861717	0.891056	0.914659	0.922171	0.0510481	0.245222	0.601392	0.677974	0.796297	0.731203	0.965233	0.923647	0.949255	0.942998	0.995946	0.0584756	0.429154	0.794311	0.855325	0.788658	0.902605	0.946251	0.989652	0.949859	0.985113	0.981274	0.229163	1.35366e-12	1.93028e-11	0.000329859	0.000195915	3.19996e-05	3.5422e-06	0.00258645	0.0021101	0.000268674	3.67941e-05	0.0352949	0.376094	0.737129
650	2724	RDN25-1	0.168962	0.0790322	0.534704	0.227564	0.10563	0.143314	0.0825469	0.920972	0.757754	0.912294	0.789302	0.0339423	0.439899	0.769777	0.838159	0.531073	0.796242	0.41444	0.966331	0.857284	0.958216	0.805214	0.123885	0.092942	0.431198	0.329777	0.137062	0.191097	0.0967293	0.868392	0.641052	0.790649	0.706124	0.236908	2.21354e-13	3.68252e-12	1.01296e-05	3.76246e-06	2.81067e-08	1.79792e-10	0.000122676	8.52392e-05	5.0248e-07	4.5873e-09	-0.00434133	0.913332	0.973929
650	2729	RDN25-1	0.178174	0.0637954	0.502732	0.200184	0.0391029	0.151355	0.114231	0.905288	0.646813	0.912294	0.824829	-0.0148073	0.736219	0.913056	0.252927	0.645355	0.332561	0.488638	0.699365	0.907919	0.765407	0.849367	0.0688692	0.351605	0.749636	0.784963	0.196578	0.654052	0.527536	0.989652	0.708359	0.949115	0.91261	0.254595	2.76829e-15	6.33246e-14	1.60425e-06	1.16801e-08	1.10562e-08	5.39652e-10	2.39544e-05	6.01867e-07	2.16835e-07	1.28928e-08	-0.0429205	0.281699	0.654948
650	2735	RDN25-1	0.0164277	0.865368	0.973848	0.849298	0.287146	0.941787	0.876814	0.995385	0.891056	0.997721	0.995705	0.0176528	0.687972	0.890445	0.730077	0.0571519	0.900512	0.767259	0.937942	0.339451	0.983687	0.942273	-0.0278551	0.706637	0.90321	0.432622	0.414123	0.513096	0.445256	0.912525	0.834248	0.895638	0.90041	-0.00341948	0.91688	0.970808	0.373368	0.0732721	0.491468	0.358868	0.680648	0.229784	0.738438	0.623334	-0.0983253	0.0134737	0.119551
650	2791	RDN25-1	-0.127204	0.187469	0.70014	0.230103	0.536125	0.182347	0.173961	0.920972	0.931958	0.914659	0.880117	-0.0179321	0.6833	0.889427	0.780273	0.481088	0.598289	0.562547	0.951093	0.825677	0.899084	0.879799	-0.0513587	0.487509	0.822238	0.552738	0.91174	0.450214	0.431148	0.94709	0.986765	0.873182	0.90041	0.144743	8.95343e-06	5.26948e-05	0.000839292	0.000100497	0.000536161	0.000498407	0.00596124	0.00120048	0.00351583	0.00329723	-0.0609354	0.126248	0.44946
650	2793	RDN25-1	0.0246564	0.799116	0.957799	0.865453	0.397188	0.833457	0.988135	0.995385	0.903623	0.997721	0.996323	0.0236029	0.591262	0.853095	0.757796	0.138917	0.682111	0.992537	0.945626	0.514915	0.923539	0.998448	0.0962543	0.192454	0.601817	0.272874	0.0593567	0.23799	0.350966	0.86576	0.53998	0.808587	0.885001	0.175283	6.98631e-08	5.31475e-07	0.000133354	4.44917e-06	1.17731e-05	7.35724e-05	0.00115957	9.58394e-05	0.000109715	0.000567003	-0.0667714	0.0937729	0.389028
650	2815	RDN25-1	0.0993682	0.30394	0.804026	0.411817	0.397524	0.536064	0.414173	0.978595	0.903623	0.979865	0.9646	0.00267892	0.951405	0.990223	0.829931	0.927658	0.49792	0.778058	0.964052	0.986598	0.863163	0.944451	-0.0643177	0.384417	0.771886	0.335526	0.401996	0.20231	0.303676	0.876502	0.834248	0.795318	0.864274	0.237855	1.76593e-13	2.98306e-12	2.94967e-07	1.05051e-05	2.10237e-07	5.95211e-09	5.66108e-06	0.000197195	2.93885e-06	1.1173e-07	0.00822986	0.836537	0.947836
650	2826	RDN25-1	0.169325	0.0783806	0.534704	0.37718	0.0574972	0.170024	0.241126	0.970097	0.654124	0.914659	0.941351	-0.028943	0.510183	0.804858	0.044772	0.929177	0.230959	0.101511	0.360922	0.987197	0.66262	0.485039	0.00714862	0.923065	0.977363	0.378845	0.63179	0.765091	0.572143	0.889191	0.906476	0.96542	0.917944	-0.0260128	0.427162	0.688392	0.0183312	0.87495	0.152374	0.045633	0.0858724	0.94914	0.37504	0.156558	-0.0343718	0.388714	0.740505
650	2843	RDN25-1	0.141254	0.142895	0.634355	0.368244	0.816267	0.265454	0.172551	0.966779	0.986331	0.951479	0.880117	-0.0189139	0.666974	0.883399	0.210099	0.0261209	0.342376	0.651535	0.65731	0.226553	0.766345	0.908404	0.101754	0.16814	0.573942	0.511582	0.862795	0.351848	0.209313	0.93689	0.974316	0.836691	0.815135	-0.0375999	0.25098	0.505335	0.0530741	0.00361539	0.0960941	0.29206	0.19399	0.0230055	0.276086	0.561884	0.116554	0.00336797	0.0482352
650	2865	RDN25-1	0.0471567	0.626311	0.923223	0.819364	0.886892	0.764842	0.843672	0.995385	0.997597	0.997721	0.995705	-0.00648755	0.882671	0.969496	0.578374	0.531016	0.642959	0.49462	0.891791	0.857284	0.914661	0.852011	0.109715	0.137104	0.522708	0.288092	0.366041	0.237223	0.291321	0.867306	0.814527	0.808587	0.86051	-0.0279975	0.392736	0.658023	0.248189	0.260516	0.260798	0.155852	0.538152	0.529495	0.518212	0.383861	0.0318036	0.425152	0.762358
650	2870	RDN25-1	0.22404	0.0191844	0.304992	0.0713463	0.066067	0.0718956	0.0653475	0.743145	0.688314	0.847002	0.788575	0.019349	0.659789	0.882709	0.699416	0.872012	0.620644	0.671084	0.933184	0.969035	0.90305	0.913041	-0.0707844	0.338341	0.738566	0.173944	0.2481	0.146345	0.15788	0.803037	0.745893	0.755785	0.772356	-0.013698	0.675883	0.870126	0.226741	0.419705	0.145817	0.164858	0.512727	0.680434	0.363919	0.398205	0.0291931	0.464154	0.787386
650	2880	RDN25-1	0.144372	0.134192	0.630616	0.305618	0.0833442	0.220509	0.199522	0.952625	0.730096	0.936384	0.909249	-0.0139586	0.750822	0.919408	0.327599	0.648663	0.493122	0.559535	0.773521	0.909651	0.859937	0.879362	0.0460097	0.534016	0.848144	0.928423	0.310731	0.744188	0.690888	0.996787	0.774768	0.964961	0.932074	-0.0525985	0.108176	0.283705	0.0401963	0.838573	0.0663982	0.0826859	0.157665	0.934031	0.21228	0.244982	-0.0417921	0.294554	0.66436
650	2921	RDN25-1	0.00991197	0.918524	0.986829	0.862115	0.642157	0.87806	0.746551	0.995385	0.947996	0.997721	0.986029	0.0681734	0.120505	0.42682	0.454014	0.075683	0.137655	0.604832	0.838646	0.397019	0.556971	0.891608	0.0713576	0.334434	0.736017	0.594402	0.197063	0.328988	0.715778	0.952173	0.708359	0.836691	0.935388	0.00541997	0.868612	0.954099	0.612089	0.389543	0.778166	0.3355	0.83649	0.659614	0.905277	0.604666	-0.0403032	0.312108	0.682658
650	2922	RDN25-1	0.00991197	0.918524	0.986829	0.928326	0.552421	0.753447	0.942206	0.995385	0.935373	0.997721	0.995705	0.0544467	0.215158	0.571986	0.512665	0.747987	0.802107	0.290761	0.867048	0.93594	0.958216	0.736054	0.0556704	0.451659	0.802463	0.65534	0.831727	0.862277	0.499072	0.955594	0.959184	0.972143	0.901827	0.0538635	0.099942	0.26592	0.436626	0.703574	0.76406	0.185792	0.726718	0.861199	0.901639	0.430566	0.0740092	0.0631758	0.309214
650	2923	RDN25-1	0.0662003	0.494017	0.889231	0.999434	0.489657	0.68902	0.687823	0.999725	0.922384	0.997721	0.981654	0.0317532	0.469972	0.788784	0.521827	0.511328	0.89868	0.896749	0.867048	0.845139	0.983028	0.978873	0.153082	0.0374978	0.268517	0.280797	0.0605143	0.103363	0.101417	0.86612	0.53998	0.720528	0.719605	0.00880269	0.788186	0.917591	0.197186	0.746377	0.675612	0.669493	0.469404	0.889964	0.852332	0.848553	-0.00839132	0.833376	0.947836
650	2944	RDN25-1	0.203159	0.0341126	0.388902	0.0755719	0.0447681	0.156377	0.0484475	0.743145	0.646813	0.914659	0.727543	-0.058816	0.180524	0.522685	0.137668	0.432889	0.0160295	0.193598	0.557459	0.799165	0.180023	0.644835	-0.0189326	0.798114	0.931331	0.624972	0.926449	0.311046	0.760374	0.952173	0.989779	0.829184	0.948148	-0.036876	0.260226	0.516066	0.193672	0.625355	0.0134437	0.279943	0.46312	0.821456	0.0609141	0.545544	-0.0109334	0.784002	0.934567
650	2946	RDN25-1	0.0315351	0.744786	0.945193	0.994099	0.849223	0.795509	0.633344	0.998659	0.991692	0.997721	0.981654	0.026616	0.54479	0.829449	0.938465	0.676912	0.665626	0.374878	0.983651	0.920051	0.919215	0.792836	0.0508794	0.491585	0.823794	0.805115	0.989182	0.562255	0.387894	0.989652	0.997669	0.923005	0.890455	0.239187	1.2831e-13	2.23003e-12	1.69413e-06	0.000308649	1.77683e-09	1.82993e-11	2.50122e-05	0.00310778	4.44716e-08	6.0874e-10	0.0520514	0.191618	0.554647
650	2948	RDN25-1	0.0376831	0.697257	0.937818	0.979298	0.601433	0.986994	0.623497	0.996965	0.941893	0.999908	0.978758	0.00290663	0.947281	0.990223	0.550823	0.722942	0.464756	0.757412	0.884225	0.928134	0.845285	0.940545	-0.00568628	0.938768	0.980548	0.61832	0.880014	0.56911	0.933146	0.952173	0.97829	0.925509	0.978278	0.251906	5.51099e-15	1.19429e-13	5.85333e-07	2.04151e-07	3.93048e-08	3.7742e-12	1.01871e-05	7.05932e-06	6.66407e-07	1.626e-10	-0.0187674	0.63797	0.86623
650	2959	RDN25-1	0.0134361	0.889714	0.980318	0.753723	0.864331	0.887066	0.897109	0.995385	0.995518	0.997721	0.995705	-0.0411216	0.349347	0.693641	0.104836	0.232146	0.165959	0.399875	0.504892	0.642231	0.58909	0.798187	0.202892	0.00560919	0.0917681	0.0505875	0.0448892	0.0246402	0.00903143	0.64174	0.491536	0.484222	0.387651	0.261051	5.12864e-16	1.27021e-14	6.82258e-07	9.58214e-06	1.65738e-09	6.23779e-12	1.13479e-05	0.000183361	4.22874e-08	2.52199e-10	0.0318983	0.423774	0.761282
650	2975	RDN25-1	-0.14456	0.133683	0.630616	0.0242329	0.0763127	0.0256371	0.0713041	0.551748	0.718069	0.592641	0.789221	-0.124556	0.00444725	0.0437291	6.80152e-05	0.00509527	3.1427e-05	0.000902721	0.00415684	0.0877916	0.0020144	0.0275855	0.0738609	0.317711	0.723491	0.85346	0.747091	0.91529	0.648117	0.989652	0.93968	0.986985	0.929523	0.0282825	0.387935	0.653752	0.172173	0.738396	0.172737	0.80102	0.430515	0.88648	0.404231	0.918384	0.0460133	0.248434	0.624193
663	776	RDN25-1	-0.0822213	0.395348	0.843013	0.294963	0.542238	0.348053	0.319789	0.952625	0.933691	0.979865	0.943026	-0.0305334	0.487209	0.796069	0.287719	0.81861	0.377636	0.314824	0.730745	0.958016	0.794577	0.761137	0.0324215	0.661309	0.887351	0.943563	0.572196	0.810495	0.863517	0.996787	0.887706	0.965422	0.966529	0.0628922	0.0546809	0.167018	0.414621	0.134837	0.21224	0.256467	0.707549	0.355775	0.461346	0.516868	-0.0165198	0.678744	0.886919
663	805	RDN25-1	0.0518584	0.592279	0.910866	0.797384	0.847042	0.951715	0.797953	0.995385	0.991692	0.998599	0.98932	0.0658778	0.133547	0.447967	0.448181	0.567878	0.684656	0.414557	0.836507	0.87301	0.924632	0.805214	-0.0409972	0.579527	0.860281	0.41761	0.40567	0.273	0.395606	0.906193	0.834248	0.815631	0.898865	0.164113	4.58228e-07	3.11217e-06	0.00160963	0.0113738	0.00252494	0.000319416	0.0107091	0.0581526	0.0139991	0.00220901	0.0310411	0.436342	0.771123
663	807	RDN25-1	0.0324372	0.737747	0.945193	0.59864	0.711388	0.58208	0.944366	0.99316	0.961719	0.995325	0.995705	0.044682	0.309172	0.65874	0.212475	0.392661	0.169683	0.693775	0.66148	0.782939	0.596605	0.917676	-0.078087	0.290734	0.699918	0.493754	0.414696	0.491216	0.188098	0.928957	0.834248	0.895638	0.793455	0.105355	0.00126213	0.00588041	0.00401166	0.0330812	0.00110245	0.0384213	0.0238521	0.129564	0.00672216	0.137189	-0.00755132	0.849847	0.952628
663	817	RDN25-1	-0.0665885	0.491482	0.889035	0.503021	0.516608	0.390749	0.45458	0.99193	0.929344	0.979865	0.9646	0.0252321	0.565908	0.840858	0.680115	0.721351	0.932203	0.748464	0.924647	0.927451	0.985339	0.937563	-0.00351999	0.962073	0.989097	0.935814	0.936075	0.756707	0.868973	0.996787	0.991938	0.964961	0.96897	0.229702	1.19582e-12	1.7201e-11	2.17191e-07	1.46061e-05	8.18775e-08	7.5429e-09	4.45921e-06	0.000263152	1.2808e-06	1.36709e-07	0.0034314	0.931446	0.976196
663	867	RDN25-1	-0.00465376	0.961695	0.99535	0.89182	0.932175	0.803573	0.883682	0.995385	0.997597	0.997721	0.995705	0.0831523	0.0581079	0.280489	0.169919	0.111887	0.209505	0.137287	0.609781	0.471215	0.642769	0.54742	-0.113951	0.122483	0.496101	0.129017	0.245798	0.0875105	0.113108	0.773946	0.744496	0.700617	0.736249	0.0572942	0.0801036	0.22136	0.28254	0.180419	0.356504	0.225093	0.581453	0.424857	0.618255	0.482107	-0.0138541	0.728338	0.912003
663	876	RDN25-1	0.147555	0.125733	0.615152	0.500713	0.35621	0.599982	0.417759	0.99193	0.892843	0.995892	0.9646	0.0832312	0.0578692	0.280325	0.927351	0.572252	0.815476	0.72508	0.982585	0.874317	0.958216	0.926085	0.0450986	0.542153	0.848386	0.682617	0.965338	0.528008	0.789651	0.960856	0.995694	0.900013	0.956715	0.17965	3.23854e-08	2.54601e-07	0.0205819	0.0125427	0.0292149	0.00294032	0.0943964	0.0627852	0.114728	0.0161656	0.0488568	0.220362	0.595476
663	898	RDN25-1	0.0954367	0.323566	0.814455	0.221254	0.678978	0.466983	0.590774	0.920972	0.948917	0.979865	0.978758	0.0765799	0.0810456	0.33635	0.0439514	0.673704	0.267393	0.467292	0.358566	0.919737	0.69933	0.835972	0.103446	0.161142	0.565676	0.0971288	0.542155	0.297706	0.424561	0.719027	0.88379	0.820226	0.90041	0.187529	7.70588e-09	6.64481e-08	6.59341e-07	0.00903949	2.22196e-05	0.000127362	1.1179e-05	0.0485803	0.00019595	0.000940192	0.0509415	0.201275	0.568821
663	908	RDN25-1	0.0551073	0.569263	0.906737	0.698023	0.449669	0.929603	0.738797	0.995385	0.912316	0.997721	0.985471	0.102132	0.0198343	0.134084	0.10295	0.0347912	0.258522	0.0984755	0.504892	0.267381	0.692197	0.481925	-0.0230055	0.755931	0.919611	0.6437	0.96728	0.382193	0.574228	0.953659	0.995694	0.847197	0.918356	0.161326	7.18645e-07	4.78226e-06	0.000888393	0.000369594	0.00330682	0.000267904	0.00625924	0.00359739	0.0177353	0.00187248	-0.0265586	0.50545	0.812172
663	960	RDN25-1	-0.0316529	0.743866	0.945193	0.4492	0.892276	0.3727	0.60861	0.983998	0.997597	0.979865	0.978758	-0.0340135	0.43894	0.769473	0.131369	0.780926	0.0610142	0.267858	0.54278	0.947039	0.368481	0.717827	0.140774	0.055968	0.332873	0.246792	0.0670301	0.298252	0.123453	0.851795	0.54828	0.820226	0.74868	0.00523333	0.873098	0.956463	0.346609	0.67549	0.172332	0.694621	0.653436	0.84694	0.404008	0.86638	-0.017021	0.669565	0.883039
663	966	RDN25-1	-0.0720893	0.456316	0.870707	0.340056	0.874226	0.23507	0.108551	0.961935	0.997597	0.939331	0.801142	0.038475	0.38126	0.720564	0.832782	0.125814	0.831705	0.283997	0.964814	0.494019	0.962836	0.732037	-0.00252912	0.972744	0.993816	0.716401	0.54414	0.514154	0.233678	0.968644	0.88379	0.895638	0.839759	-0.000443781	0.989193	0.997547	0.535653	0.30391	0.212053	0.0182895	0.793962	0.574586	0.461346	0.0761726	-0.0550457	0.167267	0.513494
663	986	RDN25-1	-0.0813301	0.400507	0.843524	0.389792	0.314572	0.245162	0.359556	0.975792	0.891056	0.945948	0.954535	-0.0230298	0.600302	0.859083	0.563473	0.411168	0.226993	0.479018	0.886189	0.789996	0.658507	0.841056	0.0563149	0.446431	0.799685	0.55395	0.736535	0.808734	0.571047	0.94709	0.936744	0.965422	0.917305	0.00829468	0.800143	0.922632	0.995519	0.721944	0.46618	0.928302	0.999105	0.875528	0.716864	0.972799	0.0272074	0.495105	0.809335
663	990	RDN25-1	-0.165521	0.0854231	0.546074	0.0806547	0.0655906	0.0783766	0.0742791	0.743145	0.688314	0.859342	0.789221	-0.069857	0.111588	0.411154	0.114857	0.0953649	0.0971292	0.0852154	0.522221	0.433314	0.475336	0.44789	0.0125413	0.865458	0.957293	0.977408	0.822397	0.997736	0.978115	0.996787	0.95856	0.999972	0.991318	-0.00537719	0.86964	0.954277	0.649552	0.482065	0.647613	0.605164	0.861698	0.733461	0.842955	0.808526	0.0319857	0.422504	0.760924
663	1004	RDN25-1	-0.0780809	0.419653	0.854855	0.461815	0.280461	0.318563	0.299289	0.988519	0.891056	0.97977	0.943026	-0.0435175	0.321963	0.670567	0.435711	0.179935	0.177832	0.148931	0.832112	0.58244	0.604582	0.565592	-0.0694502	0.347548	0.743874	0.405336	0.21272	0.238761	0.217668	0.900743	0.717259	0.808587	0.828154	-0.108208	0.000925375	0.00439854	0.0162343	0.00566757	0.00086004	0.000458033	0.0780482	0.0330252	0.00542011	0.00307854	0.0384231	0.335237	0.706677
663	1042	RDN25-1	-0.0751991	0.437069	0.865728	0.397741	0.1415	0.174085	0.204361	0.978595	0.786605	0.914659	0.911157	0.0403987	0.357891	0.700841	0.606637	0.479987	0.643299	0.783987	0.908499	0.824784	0.914661	0.944824	0.172402	0.0189444	0.181747	0.0480682	0.296222	0.162103	0.126578	0.64174	0.766773	0.778705	0.74868	0.00936235	0.77507	0.914338	0.939874	0.162569	0.172484	0.251405	0.979233	0.399282	0.404008	0.511372	0.0834116	0.0361912	0.218741
663	1052	RDN25-1	0.101296	0.294609	0.801388	0.346202	0.865286	0.484519	0.326505	0.961935	0.995518	0.979865	0.943026	0.0190179	0.665254	0.882709	0.773707	0.0986663	0.822201	0.725222	0.949698	0.442491	0.960397	0.926085	-0.105645	0.152374	0.549681	0.17957	0.00911197	0.085048	0.170889	0.804437	0.247089	0.700438	0.788236	-0.0230664	0.481376	0.734099	0.549901	0.00712779	0.17937	0.523107	0.801519	0.0395186	0.41432	0.749169	0.119413	0.00266086	0.04038
663	1056	RDN25-1	0.127031	0.188075	0.700815	0.225925	0.193717	0.429225	0.448895	0.920972	0.863948	0.979865	0.9646	0.0586424	0.181816	0.524892	0.288628	0.242258	0.813751	0.86919	0.730745	0.649647	0.958216	0.966665	-0.0615915	0.404931	0.786	0.438291	0.572749	0.169806	0.153686	0.912525	0.887706	0.779823	0.772356	0.00844397	0.796624	0.921806	0.878236	0.689653	0.331897	0.277622	0.959562	0.853701	0.595375	0.542851	-0.0127851	0.748563	0.919719
663	1110	RDN25-1	-0.0526824	0.586402	0.910278	0.862883	0.185081	0.750552	0.68663	0.995385	0.850454	0.997721	0.981654	-0.0490455	0.264256	0.620869	0.687629	0.0223869	0.468867	0.446662	0.925288	0.210964	0.848306	0.824929	-0.0778908	0.291951	0.699918	0.928444	0.0517527	0.927893	0.398839	0.996787	0.51323	0.988048	0.898865	-0.0107161	0.743615	0.900307	0.17781	0.0568221	0.060566	0.980846	0.438952	0.194185	0.197923	0.995621	0.090298	0.023305	0.16504
663	1124	RDN25-1	0.0683849	0.479843	0.882439	0.688231	0.530868	0.738581	0.799887	0.995083	0.929344	0.997721	0.98932	0.0115987	0.791885	0.93695	0.778843	0.859039	0.647595	0.527539	0.950203	0.967482	0.914701	0.865914	0.152642	0.0380561	0.270371	0.119487	0.0773183	0.131162	0.157802	0.761127	0.564716	0.736155	0.772356	-0.00188817	0.954045	0.985767	0.520727	0.960561	0.360664	0.251162	0.782364	0.986076	0.62234	0.511372	0.000740799	0.985183	0.994612
663	1133	RDN25-1	0.18553	0.0534264	0.464142	0.231941	0.104098	0.110678	0.166641	0.921357	0.757754	0.912294	0.878	0.0366199	0.404657	0.745076	0.621157	0.686879	0.811454	0.835335	0.91474	0.920285	0.958216	0.96147	0.0746151	0.312781	0.718018	0.887713	0.468977	0.527337	0.723036	0.993093	0.855214	0.900013	0.936623	0.129621	7.1015e-05	0.000383481	0.131636	0.02599	0.00779821	0.0315687	0.359978	0.109458	0.0382345	0.115708	0.0119902	0.763716	0.925813
663	1437	RDN25-1	0.0842936	0.383504	0.841992	0.636969	0.19429	0.902669	0.775392	0.99316	0.863948	0.997721	0.98932	0.0244837	0.57749	0.844496	0.840018	0.188943	0.340771	0.529254	0.966858	0.589319	0.766345	0.865914	0.0889766	0.228435	0.640598	0.509498	0.0942307	0.827804	0.667821	0.93466	0.584175	0.967816	0.929548	0.0781772	0.0168638	0.0624633	0.334306	0.0116135	0.873173	0.555451	0.640814	0.0590337	0.956523	0.775367	-0.0557747	0.161706	0.50489
663	1449	RDN25-1	0.198494	0.0385387	0.409686	0.118576	0.10448	0.18238	0.128126	0.81553	0.757754	0.914659	0.845243	0.00651016	0.882265	0.969496	0.550436	0.754307	0.241422	0.419506	0.884225	0.93594	0.673474	0.808256	0.165069	0.0247432	0.214927	0.117113	0.103903	0.198886	0.126152	0.760271	0.601448	0.790649	0.74868	0.0823447	0.0118199	0.0461312	0.324176	0.284616	0.657542	0.34984	0.628894	0.553642	0.847873	0.615529	0.0256396	0.520297	0.819244
663	1450	RDN25-1	0.0324239	0.737851	0.945193	0.872629	0.949955	0.92429	0.832533	0.995385	0.997597	0.997721	0.994181	0.0375296	0.393078	0.734771	0.685225	0.978165	0.926567	0.588073	0.924977	0.995977	0.985339	0.890349	0.10541	0.153293	0.550053	0.270064	0.442363	0.421105	0.227883	0.864468	0.842792	0.863232	0.83762	0.0898301	0.00601039	0.0248721	0.0950306	0.338815	0.227263	0.0414951	0.286072	0.611898	0.477797	0.145746	0.0392005	0.325543	0.697683
663	1888	RDN25-1	0.0424257	0.661366	0.934193	0.734294	0.95652	0.876283	0.663702	0.995385	0.997597	0.997721	0.981654	-0.0330533	0.451977	0.778415	0.0393317	0.183014	0.0667947	0.52541	0.348026	0.584601	0.386341	0.865914	-0.0377594	0.609852	0.871603	0.156972	0.320387	0.224402	0.647809	0.792955	0.780647	0.798978	0.929523	0.230968	8.92887e-13	1.33689e-11	0.000407161	0.000439977	8.37443e-06	1.03805e-09	0.00311959	0.0041443	8.09118e-05	2.25455e-08	0.0483079	0.225596	0.604193
663	2129	RDN25-1	-0.0346896	0.720266	0.942096	0.622224	0.312641	0.542132	0.398199	0.99316	0.891056	0.979865	0.9646	-0.0184679	0.674373	0.884309	0.514437	0.128547	0.355902	0.155944	0.867048	0.498997	0.778284	0.576752	0.0782591	0.289669	0.699918	0.449046	0.963519	0.520501	0.730674	0.912525	0.995694	0.895819	0.937971	-0.0413879	0.20633	0.441332	0.192587	0.0293016	0.0822295	0.0169428	0.461968	0.119018	0.24932	0.0723997	0.074318	0.0620798	0.306713
663	2133	RDN25-1	0.0493569	0.610282	0.917093	0.586053	0.952746	0.842769	0.881595	0.99316	0.997597	0.997721	0.995705	0.0060331	0.890836	0.971339	0.804106	0.545535	0.643249	0.56653	0.958326	0.865654	0.914661	0.880523	-0.0539369	0.465892	0.814279	0.567572	0.263171	0.293501	0.262317	0.94709	0.757518	0.820226	0.844052	-0.0140532	0.667972	0.864402	0.87962	0.283277	0.276605	0.213776	0.959562	0.553013	0.536867	0.465782	0.0429641	0.28121	0.654948
663	2142	RDN25-1	-0.0910625	0.346337	0.821103	0.406499	0.555347	0.28033	0.41158	0.978595	0.935373	0.96429	0.9646	0.00277142	0.94973	0.990223	0.88695	0.619883	0.745239	0.831438	0.978225	0.892005	0.945949	0.960448	0.0568024	0.442499	0.798779	0.449601	0.330055	0.632077	0.412011	0.912525	0.784787	0.942067	0.90041	0.060436	0.0648595	0.189006	0.141962	0.0976272	0.295417	0.0790338	0.377642	0.28121	0.562576	0.236292	-0.0275484	0.489712	0.80425
663	2191	RDN25-1	0.0983233	0.309078	0.806657	0.301868	0.321441	0.365775	0.30129	0.952625	0.891056	0.979865	0.943026	0.0502964	0.252251	0.608729	0.271083	0.335464	0.376638	0.246937	0.714381	0.737741	0.794385	0.698548	0.0349897	0.636334	0.879381	0.591071	0.615308	0.71627	0.596897	0.952173	0.90035	0.964473	0.929523	0.0361727	0.269432	0.527965	0.311552	0.400064	0.450642	0.27036	0.61758	0.669234	0.704526	0.534215	-0.00854957	0.830281	0.947206
663	2197	RDN25-1	0.103653	0.283459	0.7975	0.24039	0.56739	0.282743	0.287618	0.925971	0.937209	0.96429	0.943026	0.0200255	0.64868	0.880146	0.47701	0.716903	0.605751	0.621532	0.848828	0.927107	0.899084	0.896772	0.0462364	0.532001	0.848029	0.429615	0.962532	0.511212	0.520866	0.912525	0.995694	0.895638	0.905913	0.0513998	0.116466	0.300234	0.117627	0.861915	0.149876	0.15149	0.330613	0.94497	0.370531	0.377361	0.0421728	0.290175	0.66169
663	2220	RDN25-1	0.077733	0.421734	0.854855	0.445671	0.581407	0.401374	0.76581	0.983998	0.941893	0.979865	0.98932	0.00881468	0.841069	0.955756	0.847543	0.876902	0.738405	0.430947	0.969253	0.970816	0.943976	0.817119	-0.0480029	0.51643	0.841305	0.568957	0.444127	0.611441	0.224482	0.947275	0.842792	0.939224	0.836791	0.186113	1.00198e-08	8.50651e-08	2.01218e-05	0.00138365	7.75524e-07	0.000289936	0.000217667	0.0106948	9.56844e-06	0.0020211	0.0182834	0.646663	0.872319
663	2256	RDN25-1	0.122694	0.203729	0.72393	0.243799	0.444289	0.306249	0.354846	0.925971	0.911332	0.977591	0.954535	-0.0626162	0.153917	0.48194	0.229545	0.0910785	0.102281	0.0620416	0.682401	0.427418	0.486389	0.38913	0.0531093	0.472773	0.815793	0.530519	0.884908	0.664038	0.759801	0.93919	0.979185	0.952004	0.948148	0.0356092	0.276968	0.537615	0.449363	0.925233	0.671503	0.866528	0.733854	0.970656	0.851185	0.94696	0.0405911	0.308661	0.678273
663	2258	RDN25-1	0.00526993	0.956628	0.99535	0.910018	0.993523	0.992727	0.844107	0.995385	0.999839	0.999984	0.995705	0.0374513	0.394067	0.734771	0.413774	0.608455	0.530703	0.804539	0.820677	0.888537	0.878775	0.951971	0.0335285	0.650496	0.883145	0.623898	0.751958	0.729709	0.916548	0.952173	0.93968	0.964961	0.976414	0.0187866	0.566355	0.800332	0.570077	0.812055	0.75116	0.866966	0.815548	0.922647	0.893639	0.94696	0.00614756	0.877515	0.962228
663	2260	RDN25-1	-0.105559	0.27465	0.793013	0.420289	0.0779753	0.073618	0.26692	0.983544	0.719014	0.852282	0.943026	0.0257413	0.558094	0.838286	0.374502	0.335777	0.305885	0.704627	0.797109	0.737811	0.742075	0.920765	0.0139629	0.850377	0.950198	0.659373	0.4151	0.427041	0.930487	0.958955	0.834248	0.867284	0.978278	-0.00337476	0.917963	0.970885	0.675237	0.0979814	0.0433731	0.78741	0.872968	0.281415	0.157004	0.915626	0.0843963	0.0340407	0.210376
663	2264	RDN25-1	-0.0455373	0.638222	0.925717	0.691255	0.319826	0.421534	0.37641	0.995325	0.891056	0.979865	0.963199	-0.0140684	0.748928	0.918333	0.854613	0.21355	0.310175	0.233778	0.96959	0.616888	0.746276	0.686106	0.0102217	0.890169	0.96391	0.8597	0.550385	0.739386	0.663124	0.989652	0.88379	0.964961	0.929523	-0.000360762	0.991215	0.998337	0.931079	0.240946	0.352502	0.247995	0.976018	0.502994	0.614306	0.507578	0.061902	0.120335	0.442495
663	2266	RDN25-1	0.0103579	0.914872	0.986444	0.721821	0.847243	0.876936	0.914139	0.995385	0.991692	0.997721	0.995705	0.0570162	0.194254	0.547367	0.119335	0.671923	0.209854	0.240836	0.527966	0.919737	0.642769	0.6951	-0.00391672	0.957802	0.988087	0.780087	0.685487	0.984419	0.966598	0.989652	0.922555	0.999725	0.987644	-0.0043483	0.89442	0.961247	0.615411	0.503907	0.977616	0.923543	0.839284	0.751105	0.992435	0.971289	0.0311743	0.434375	0.769678
663	2278	RDN25-1	-0.155694	0.105959	0.581052	0.0991875	0.0767977	0.142389	0.0868613	0.776692	0.718069	0.912294	0.789302	-0.0258461	0.556491	0.837677	0.450686	0.324884	0.706981	0.379449	0.837033	0.731086	0.934914	0.793782	-0.0243196	0.742467	0.917028	0.632492	0.498504	0.827716	0.596132	0.953659	0.871252	0.967816	0.929523	0.0112424	0.731497	0.892497	0.937637	0.663973	0.643947	0.874335	0.978588	0.841863	0.841341	0.947522	0.0343259	0.389348	0.740714
663	2280	RDN25-1	0.0852955	0.377856	0.835902	0.636391	0.963016	0.742054	0.837415	0.99316	0.997597	0.997721	0.994181	0.0974868	0.0262166	0.166392	0.252788	0.905206	0.357203	0.499877	0.699365	0.977227	0.779157	0.856932	0.0366572	0.620333	0.875858	0.996092	0.534454	0.847625	0.722641	0.998371	0.883318	0.967816	0.936623	0.127787	8.99614e-05	0.000481842	0.0383511	0.475068	0.0536056	0.0999918	0.152016	0.727976	0.18061	0.280746	0.0902699	0.0233482	0.16504
663	2281	RDN25-1	-0.114533	0.235668	0.752218	0.357366	0.25366	0.0702923	0.0971024	0.965316	0.891056	0.847002	0.790816	0.0596217	0.174616	0.513557	0.142558	0.401239	0.838184	0.906388	0.567984	0.788679	0.963255	0.979496	-0.00246037	0.973485	0.993937	0.837638	0.900553	0.360619	0.473852	0.989652	0.984139	0.836691	0.90041	0.217461	1.84787e-11	2.26278e-10	6.87936e-08	6.35372e-05	0.000140749	1.69131e-05	1.67398e-06	0.000843312	0.00102462	0.000142461	0.00837018	0.83379	0.947836
663	2288	RDN25-1	-0.103042	0.286321	0.799161	0.20941	0.149348	0.103148	0.229307	0.912651	0.800012	0.903208	0.931423	-0.00105574	0.980839	0.999169	0.598148	0.381339	0.198366	0.683387	0.903594	0.77648	0.629597	0.917676	-0.0102293	0.890087	0.96391	0.645814	0.469436	0.354118	0.710267	0.953659	0.855214	0.836691	0.933884	0.194843	1.92112e-09	1.79268e-08	0.000133694	0.00642119	0.000717909	4.37889e-06	0.00115957	0.0362901	0.00457928	4.32621e-05	0.0524207	0.188481	0.550892
663	2314	RDN25-1	0.0326137	0.736373	0.945193	0.932077	0.767485	0.749653	0.933873	0.995385	0.97722	0.997721	0.995705	-0.00277735	0.949622	0.990223	0.621953	0.270532	0.17273	0.372707	0.91474	0.675796	0.59834	0.791815	0.00197466	0.978718	0.995149	0.789732	0.470026	0.424095	0.619321	0.989652	0.855214	0.865984	0.929523	0.00265611	0.935389	0.978461	0.635684	0.244041	0.114969	0.32255	0.853856	0.50779	0.310842	0.59649	0.0645002	0.105512	0.413758
663	2337	RDN25-1	0.1874	0.0510242	0.455706	0.124633	0.146352	0.183776	0.087448	0.816031	0.797686	0.91644	0.789302	0.0746691	0.0889439	0.354901	0.402084	0.490035	0.674245	0.228819	0.814601	0.833185	0.921434	0.678711	0.0933587	0.20624	0.617596	0.4339	0.481373	0.615099	0.3215	0.912525	0.860356	0.939224	0.864274	0.180823	2.62541e-08	2.10416e-07	0.000584836	0.0047175	0.00115604	1.66341e-05	0.00430518	0.0286981	0.00698409	0.000140561	0.0325942	0.413728	0.756988
663	2340	RDN25-1	0.0725048	0.453717	0.870307	0.963149	0.569194	0.554491	0.602378	0.996965	0.938007	0.983595	0.978758	0.0196399	0.655002	0.882336	0.370496	0.888774	0.882164	0.998979	0.794731	0.973332	0.976138	0.99936	0.006792	0.926892	0.97772	0.454842	0.960437	0.945011	0.870928	0.912525	0.995694	0.991316	0.970252	0.00283114	0.931142	0.976252	0.144396	0.876526	0.812441	0.666285	0.381764	0.949464	0.924284	0.846703	0.0110911	0.780966	0.93308
663	2347	RDN25-1	0.0299474	0.757227	0.94985	0.918086	0.685978	0.844885	0.951583	0.995385	0.950818	0.997721	0.995705	0.0821111	0.0613345	0.289865	0.439034	0.887765	0.146998	0.234184	0.832851	0.973332	0.563956	0.686106	0.146512	0.0465876	0.299726	0.190462	0.393815	0.0820304	0.115707	0.809453	0.834248	0.700438	0.74448	0.0814321	0.0127929	0.049344	0.357767	0.8812	0.0710929	0.136407	0.668183	0.950994	0.223217	0.352833	0.0735345	0.0648918	0.312963
663	2349	RDN25-1	0.00571873	0.952938	0.99535	0.88083	0.998883	0.971354	0.858327	0.995385	0.999839	0.999477	0.995705	0.00385973	0.930033	0.985129	0.745375	0.973769	0.911747	0.683789	0.939954	0.995443	0.985339	0.917676	0.162442	0.0271632	0.227452	0.0808378	0.0682685	0.0508668	0.0752655	0.689521	0.54828	0.599066	0.681691	0.0860715	0.00849264	0.0341156	0.144614	0.130389	0.0527184	0.108177	0.381954	0.346649	0.178077	0.29831	0.00587008	0.883003	0.962316
663	2351	RDN25-1	-0.0451905	0.640785	0.926171	0.486334	0.377944	0.251153	0.692626	0.99193	0.898043	0.945948	0.981654	-0.0251619	0.566991	0.841292	0.32969	0.218312	0.0513474	0.68136	0.775672	0.621585	0.335651	0.917676	-0.0531949	0.472058	0.815793	0.324123	0.233122	0.113421	0.539596	0.868392	0.736353	0.729436	0.91261	0.0293896	0.369624	0.636726	0.961915	0.697	0.282991	0.376219	0.986118	0.857368	0.544836	0.641599	0.050057	0.209221	0.582223
663	2416	RDN25-1	-0.0101782	0.916343	0.986639	0.910987	0.960995	0.814507	0.95692	0.995385	0.997597	0.997721	0.995705	-0.0149423	0.733904	0.911225	0.898288	0.993184	0.564528	0.988064	0.979022	0.999856	0.888772	0.998151	-0.0689622	0.350954	0.749133	0.562826	0.536251	0.295013	0.497507	0.94709	0.88379	0.820226	0.901827	0.0841553	0.0100813	0.0397699	0.0170979	0.0604384	0.0754566	0.0100017	0.0811071	0.202334	0.234397	0.0471878	-0.0154645	0.698225	0.899859
663	2417	RDN25-1	-0.143578	0.136369	0.631274	0.0807086	0.0540981	0.0899506	0.278628	0.743145	0.646813	0.88126	0.943026	0.0644429	0.142237	0.462234	0.612751	0.988472	0.471915	0.0446356	0.910809	0.999117	0.849795	0.32766	0.0482815	0.513995	0.838306	0.892681	0.85961	0.803737	0.294099	0.993093	0.974315	0.965422	0.86051	0.160053	8.80534e-07	5.76636e-06	0.00530284	0.0658531	0.000822293	4.68283e-07	0.0305611	0.21313	0.0052111	5.77768e-06	0.0635631	0.110682	0.423446
663	2421	RDN25-1	-0.159441	0.0977141	0.567222	0.11544	0.0150791	0.168104	0.0782439	0.809485	0.396388	0.914659	0.789221	-0.0265946	0.545114	0.829449	0.580701	0.0355112	0.894722	0.35915	0.892823	0.268609	0.981909	0.787075	0.0675158	0.361173	0.754285	0.429576	0.692058	0.26816	0.532628	0.912525	0.925325	0.815631	0.91261	0.204857	2.62463e-10	2.86276e-09	4.2868e-06	0.0464805	9.53833e-09	1.09388e-06	5.5224e-05	0.16895	1.91349e-07	1.22329e-05	0.101595	0.0106622	0.10547
663	2619	RDN25-1	0.152267	0.113966	0.602415	0.120242	0.124654	0.269522	0.272935	0.81553	0.779028	0.958941	0.943026	-0.0598432	0.173017	0.512036	0.337719	0.438494	0.0437469	0.0386374	0.777591	0.801923	0.318453	0.309571	0.015218	0.837106	0.946575	0.772962	0.748699	0.747857	0.735375	0.989252	0.93968	0.964961	0.93913	0.154074	2.23759e-06	1.40661e-05	0.000237439	0.00159222	0.00387198	0.00347469	0.00192589	0.0119895	0.0205567	0.0186713	-0.0125461	0.753109	0.922301
663	2634	RDN25-1	0.171949	0.0738003	0.526386	0.115509	0.549213	0.0710163	0.0537957	0.809485	0.9348	0.847002	0.764667	0.0411585	0.348914	0.693199	0.559387	0.267881	0.297604	0.194049	0.8857	0.675105	0.729702	0.645522	0.0423712	0.566874	0.856695	0.689552	0.442746	0.501677	0.40812	0.964605	0.842792	0.895638	0.90041	-0.10758	0.000991394	0.00467189	0.00816616	4.49988e-05	0.0143058	0.0280788	0.0441578	0.000639226	0.0638298	0.105416	0.108494	0.00637196	0.0730996
663	2640	RDN25-1	0.092035	0.34119	0.821103	0.727906	0.279319	0.949656	0.737622	0.995385	0.891056	0.998279	0.985471	0.0303512	0.489812	0.796742	0.632776	0.368144	0.265918	0.571699	0.917253	0.768776	0.69933	0.880681	0.12882	0.0805408	0.395972	0.368246	0.0752143	0.580816	0.36457	0.889191	0.563143	0.926946	0.890455	0.191726	3.49579e-09	3.12063e-08	0.00193038	3.86553e-05	0.00637436	0.000464457	0.0126826	0.000570709	0.0323394	0.00310583	-0.0246584	0.536392	0.826094
663	2724	RDN25-1	0.161257	0.0939065	0.560377	0.17767	0.102739	0.155932	0.104263	0.886505	0.757754	0.914659	0.797403	0.0851778	0.0522331	0.265239	0.241003	0.105	0.174871	0.0731917	0.695001	0.456853	0.600006	0.412764	0.0369365	0.617669	0.875843	0.857657	0.558706	0.807954	0.613903	0.989652	0.88379	0.965422	0.929523	0.194806	1.935e-09	1.80054e-08	8.46628e-05	7.19045e-05	6.04744e-06	2.57949e-07	0.000800337	0.000912875	6.01995e-05	3.3559e-06	-0.0137286	0.730702	0.913139
663	2729	RDN25-1	0.0981635	0.309869	0.806657	0.742487	0.45401	0.441314	0.264665	0.995385	0.912316	0.979865	0.943026	-0.038884	0.376214	0.718015	0.0551465	0.355974	0.239033	0.628558	0.397575	0.758718	0.673474	0.900682	-0.0246509	0.739085	0.914723	0.276177	0.626425	0.574082	0.903418	0.86612	0.90357	0.926712	0.97412	0.202998	3.82774e-10	4.0542e-09	0.00147269	0.00039666	2.77586e-06	1.27371e-08	0.00987301	0.00380446	3.05229e-05	2.21676e-07	0.0175314	0.660268	0.880533
663	2735	RDN25-1	-0.0574564	0.552888	0.903104	0.307786	0.844178	0.519171	0.398717	0.952625	0.991692	0.979865	0.9646	0.00505099	0.908521	0.975128	0.417331	0.499142	0.947478	0.634792	0.822148	0.835572	0.985339	0.901888	-0.0212583	0.773946	0.924239	0.391684	0.86252	0.708367	0.527886	0.898992	0.974316	0.964131	0.91261	0.0390597	0.233035	0.479761	0.829207	0.156395	0.438641	0.783674	0.944175	0.389949	0.696104	0.912493	-0.0362545	0.363247	0.72342
663	2791	RDN25-1	0.0572999	0.553972	0.903104	0.55994	0.782485	0.526812	0.591724	0.99316	0.980795	0.979865	0.978758	0.0125487	0.775279	0.930334	0.767721	0.806628	0.69073	0.842047	0.94816	0.9519	0.92705	0.962758	0.0950829	0.197948	0.609894	0.226728	0.433686	0.194478	0.23923	0.833548	0.840506	0.790649	0.839937	0.119678	0.000246564	0.00127018	0.00550633	0.0810938	0.00131259	0.00248065	0.0315264	0.24752	0.00787556	0.0138411	0.0275083	0.490344	0.804698
663	2793	RDN25-1	0.203916	0.0334363	0.386453	0.0859784	0.0681883	0.0722969	0.0288377	0.750669	0.699995	0.847002	0.620178	0.0149249	0.734202	0.911252	0.807755	0.931201	0.868159	0.532794	0.958326	0.987197	0.970446	0.865914	0.0363383	0.623379	0.876316	0.918671	0.757979	0.868017	0.50787	0.996787	0.941947	0.974434	0.903493	0.100539	0.00209589	0.0094703	0.101746	0.0861548	0.0503706	0.00267068	0.299762	0.25876	0.172752	0.0148384	0.00964725	0.808888	0.942607
663	2815	RDN25-1	0.0884539	0.360384	0.824085	0.338225	0.225363	0.495689	0.772601	0.961935	0.891056	0.979865	0.98932	0.00801429	0.855334	0.962579	0.723182	0.409743	0.824356	0.297556	0.936336	0.789996	0.960618	0.742393	0.0357812	0.628717	0.87869	0.566251	0.367027	0.832723	0.765612	0.94709	0.81564	0.967816	0.950612	0.169444	1.8964e-07	1.37291e-06	4.30271e-05	5.93262e-05	0.000128417	0.00398149	0.000429944	0.000799535	0.000947976	0.0211809	-0.0423613	0.288022	0.659659
663	2826	RDN25-1	0.149225	0.121459	0.608032	0.135003	0.116327	0.574522	0.319197	0.831806	0.778651	0.995325	0.943026	-0.0194476	0.658165	0.882336	0.792502	0.999694	0.024161	0.164633	0.954489	0.999856	0.236793	0.592678	-0.01238	0.867172	0.957899	0.930879	0.935208	0.182963	0.436095	0.996787	0.991885	0.790649	0.90041	-0.00702258	0.830286	0.934071	0.969097	0.815519	0.0117477	0.149793	0.989428	0.923144	0.0542852	0.375268	-0.0194241	0.626253	0.858817
663	2843	RDN25-1	-0.012044	0.901079	0.983484	0.790063	0.550369	0.368194	0.77985	0.995385	0.935373	0.979865	0.98932	0.00690031	0.875265	0.967723	0.87038	0.455584	0.14335	0.846575	0.973886	0.808913	0.559769	0.963059	-0.0747736	0.311751	0.717832	0.267256	0.141483	0.0504269	0.245848	0.862835	0.648162	0.599066	0.842519	-0.00900281	0.783489	0.915506	0.579349	0.247183	0.0251334	0.512734	0.820805	0.512705	0.101773	0.739553	0.0524716	0.188051	0.550681
663	2865	RDN25-1	-0.0131698	0.891887	0.980318	0.7793	0.616535	0.872135	0.763417	0.995385	0.942478	0.997721	0.98932	-0.00752454	0.864086	0.965502	0.66176	0.427704	0.828611	0.611242	0.917777	0.796419	0.961609	0.892604	-0.0836882	0.257401	0.668914	0.221204	0.149723	0.270697	0.197757	0.832214	0.665776	0.815631	0.809498	-0.034039	0.298718	0.563883	0.260853	0.158218	0.347073	0.184539	0.555079	0.393003	0.608887	0.428418	0.0409448	0.304462	0.674875
663	2870	RDN25-1	0.0428558	0.658147	0.932919	0.607463	0.370074	0.847145	0.423164	0.99316	0.892843	0.997721	0.9646	-0.0180741	0.680929	0.888818	0.889646	0.556593	0.105856	0.675345	0.97893	0.869601	0.491304	0.916689	-0.0858893	0.245052	0.65517	0.355248	0.711284	0.0602539	0.546805	0.878741	0.928957	0.641082	0.91261	-0.060428	0.0648954	0.189006	0.262506	0.902983	0.00193141	0.574188	0.555772	0.959743	0.0109865	0.790448	-0.0539688	0.175743	0.529101
663	2880	RDN25-1	-0.00416015	0.965755	0.99535	0.807158	0.531862	0.848933	0.919171	0.995385	0.929344	0.997721	0.995705	0.0141015	0.748357	0.918333	0.416822	0.160279	0.980848	0.871954	0.822148	0.556806	0.992939	0.967976	-0.0631982	0.392763	0.779752	0.679797	0.9222	0.320662	0.377492	0.960787	0.9892	0.834123	0.890455	-0.023138	0.480015	0.732702	0.885058	0.360591	0.332826	0.450341	0.962322	0.633444	0.595964	0.696174	-0.0716244	0.0721887	0.333836
663	2921	RDN25-1	0.0309007	0.74975	0.946599	0.969641	0.998863	0.783281	0.798493	0.996965	0.999839	0.997721	0.98932	0.0422215	0.336598	0.683761	0.776117	0.850931	0.736788	0.765677	0.950203	0.96724	0.943634	0.941518	-0.0490053	0.507699	0.835345	0.352058	0.357196	0.172078	0.178218	0.878741	0.810212	0.781742	0.788236	0.0197973	0.545656	0.785883	0.872467	0.836723	0.323259	0.339329	0.957682	0.934031	0.587906	0.607249	0.0307467	0.440707	0.772823
663	2922	RDN25-1	0.0309007	0.74975	0.946599	0.905476	0.808677	0.965953	0.872667	0.995385	0.986201	0.999401	0.995705	0.00688862	0.875475	0.967723	0.828471	0.411624	0.693423	0.875604	0.964052	0.789996	0.92881	0.968879	0.0328302	0.657309	0.885444	0.861013	0.779677	0.936619	0.816601	0.989652	0.947044	0.988746	0.963473	0.00681326	0.835271	0.936163	0.792182	0.344334	0.619046	0.841299	0.92857	0.617264	0.823421	0.937631	0.0570257	0.15249	0.493878
663	2923	RDN25-1	0.0538435	0.578166	0.908626	0.862474	0.777775	0.785689	0.697863	0.995385	0.980795	0.997721	0.981654	0.00114879	0.979151	0.999169	0.518827	0.716095	0.616643	0.788214	0.867048	0.927107	0.899256	0.946609	0.0360711	0.625938	0.877378	0.997754	0.883485	0.89973	0.782534	0.99875	0.979185	0.985113	0.954735	-0.011291	0.730382	0.892058	0.289641	0.514246	0.345995	0.508874	0.588236	0.758739	0.608617	0.737131	0.0233803	0.557726	0.833755
663	2944	RDN25-1	0.0162045	0.867181	0.974247	0.99199	0.62709	0.934688	0.929619	0.998449	0.94725	0.997721	0.995705	0.0392262	0.372025	0.715958	0.654364	0.216498	0.768673	0.77524	0.917777	0.620131	0.953765	0.944054	-0.0234439	0.751431	0.919133	0.636352	0.881966	0.543891	0.536484	0.953659	0.979185	0.908098	0.91261	-0.013537	0.679479	0.871236	0.519226	0.668311	0.336945	0.318541	0.781069	0.843216	0.598709	0.592027	-0.0363011	0.36263	0.723065
663	2946	RDN25-1	0.0116781	0.90407	0.984468	0.848081	0.959794	0.964774	0.876067	0.995385	0.997597	0.999401	0.995705	0.0223129	0.611698	0.862811	0.569665	0.932379	0.761309	0.589831	0.886189	0.987197	0.951221	0.890349	0.0127523	0.863216	0.956098	0.796831	0.959735	0.943719	0.829421	0.989652	0.995694	0.991316	0.96523	0.167691	2.54223e-07	1.82046e-06	6.66762e-05	0.00420854	4.42188e-05	7.92314e-06	0.00064421	0.0262087	0.000356673	7.35761e-05	0.017127	0.667629	0.883039
663	2948	RDN25-1	-0.0819782	0.396751	0.843013	0.434967	0.497922	0.334119	0.388681	0.983998	0.922384	0.979865	0.963664	-0.0124021	0.777835	0.931341	0.830156	0.954173	0.562094	0.714129	0.964052	0.991533	0.888245	0.921926	0.0539271	0.465973	0.814279	0.501835	0.468231	0.635844	0.538887	0.93203	0.855214	0.943721	0.91261	0.223558	4.82109e-12	6.4035e-11	2.95117e-07	8.81123e-06	1.07998e-07	1.1258e-08	5.66108e-06	0.000171525	1.64057e-06	1.9724e-07	-0.00888896	0.823652	0.945029
663	2959	RDN25-1	-0.136783	0.156111	0.652395	0.072188	0.0737869	0.198329	0.2192	0.743145	0.718069	0.928383	0.927627	0.00887831	0.839938	0.955371	0.449314	0.4443	0.761905	0.663431	0.836507	0.803498	0.951221	0.909527	0.0421164	0.569211	0.858507	0.927417	0.87616	0.540981	0.487267	0.996787	0.976483	0.906117	0.90041	0.165584	3.60185e-07	2.50122e-06	0.00829283	0.0360121	1.25846e-05	3.73064e-06	0.0447506	0.138768	0.000116452	3.82973e-05	0.0555909	0.163095	0.508265
663	2975	RDN25-1	-0.107362	0.266489	0.783763	0.368093	0.062417	0.179829	0.293951	0.966779	0.683466	0.914659	0.943026	-0.0486409	0.268221	0.621859	0.51979	0.0199024	0.118159	0.33148	0.867048	0.201152	0.514108	0.776803	0.105855	0.151557	0.548003	0.140683	0.88455	0.330492	0.17333	0.779988	0.979185	0.836691	0.788236	0.0728505	0.025988	0.0913601	0.050626	0.697182	0.270625	0.0571105	0.187388	0.857368	0.529168	0.18591	0.0933945	0.0189495	0.14529
776	805	RDN25-1	-0.0785541	0.416832	0.854855	0.460548	0.360793	0.564848	0.498517	0.988016	0.892843	0.988296	0.968555	0.0514038	0.241945	0.598902	0.32163	0.607919	0.152512	0.213154	0.766314	0.888537	0.573675	0.665881	0.0519471	0.482528	0.820902	0.509489	0.712723	0.363534	0.432399	0.93466	0.928957	0.836691	0.90041	0.0666299	0.0417665	0.135146	0.123393	0.380257	0.0290707	0.0487954	0.342064	0.652295	0.114539	0.165464	0.0200784	0.614674	0.854155
776	807	RDN25-1	0.00151521	0.987524	0.997128	0.964946	0.51602	0.859476	0.764052	0.996965	0.929344	0.997721	0.98932	0.043551	0.32159	0.670567	0.385974	0.645177	0.630699	0.139836	0.805643	0.907919	0.909203	0.551906	0.0629891	0.394334	0.779752	0.418008	0.920414	0.582753	0.24178	0.906193	0.9892	0.927298	0.839937	0.0418569	0.20123	0.434945	0.312797	0.57447	0.574616	0.0677852	0.618435	0.794747	0.796042	0.21007	0.0716094	0.0722483	0.333836
776	817	RDN25-1	0.134428	0.163431	0.656572	0.191009	0.510617	0.209012	0.242707	0.905288	0.925449	0.935424	0.942146	0.00517591	0.906269	0.975031	0.909795	0.334984	0.972398	0.82139	0.980658	0.73744	0.991557	0.955984	0.033806	0.647797	0.882975	0.670541	0.726607	0.733728	0.823668	0.959472	0.93409	0.964961	0.964186	0.100582	0.0020867	0.00944173	0.0221794	0.48882	0.0178553	0.0293011	0.0992974	0.738712	0.0762989	0.10907	0.0640354	0.108052	0.41775
776	867	RDN25-1	0.161371	0.0936698	0.560377	0.360672	0.130937	0.0994508	0.0447955	0.965316	0.78239	0.896011	0.722224	-0.0230919	0.59932	0.859083	0.0917988	0.711671	0.724532	0.707741	0.481582	0.927107	0.942318	0.920765	0.0471488	0.523928	0.843369	0.802509	0.582226	0.505375	0.259604	0.989652	0.887706	0.895638	0.844052	0.000983493	0.976054	0.992831	0.134576	0.977774	0.869858	0.273566	0.364979	0.993106	0.954882	0.537272	-0.000497644	0.990046	0.996703
776	876	RDN25-1	0.218831	0.0222482	0.324273	0.00816531	0.0681661	0.0175833	0.016652	0.346104	0.699995	0.520956	0.514842	0.000546898	0.990074	0.999449	0.319361	0.686257	0.678393	0.65567	0.762982	0.920285	0.921828	0.908904	0.138822	0.0594952	0.343218	0.0182548	0.186556	0.0433593	0.0406447	0.527183	0.705579	0.578755	0.580699	0.0524342	0.109284	0.285927	0.0178087	0.608413	0.0673457	0.0571594	0.0838732	0.81298	0.213756	0.18591	0.0252387	0.526843	0.823208
776	898	RDN25-1	-0.0146222	0.880048	0.979439	0.461089	0.506111	0.773504	0.618087	0.98837	0.924285	0.997721	0.978758	0.0796197	0.0696594	0.313896	0.742725	0.712523	0.192408	0.374998	0.939308	0.927107	0.622719	0.792836	-0.0524444	0.47834	0.819381	0.160416	0.205408	0.395241	0.260051	0.794667	0.711213	0.85297	0.844052	0.110908	0.000685165	0.00333951	0.268808	0.308814	0.0149636	0.0527668	0.563789	0.579275	0.066314	0.174429	0.0571975	0.151255	0.492304
776	908	RDN25-1	0.0284079	0.769349	0.954043	0.746597	0.839741	0.647973	0.627216	0.995385	0.991692	0.995892	0.978758	0.00353577	0.935892	0.986151	0.870518	0.444566	0.66254	0.617392	0.973886	0.803498	0.918274	0.895856	0.0199854	0.787149	0.929677	0.757425	0.726729	0.629108	0.602158	0.985177	0.93409	0.942067	0.929523	0.0982562	0.00264619	0.0117791	0.019731	0.363653	0.00325521	0.00207067	0.0912906	0.634581	0.0174942	0.0118427	0.0502359	0.207596	0.58148
776	960	RDN25-1	0.0331327	0.732335	0.945193	0.815274	0.435091	0.857856	0.741006	0.995385	0.911332	0.997721	0.985774	0.131008	0.00276096	0.029721	0.0222903	0.00276134	0.0190637	0.00716813	0.24321	0.0614983	0.202832	0.11213	0.0050451	0.945661	0.982963	0.963166	0.516105	0.901414	0.943701	0.996787	0.881303	0.985113	0.981274	0.0737983	0.0241061	0.0858436	0.143616	0.0185539	0.13662	0.0552527	0.380853	0.0834925	0.34858	0.181278	-0.0511916	0.199068	0.566751
776	966	RDN25-1	0.15836	0.10004	0.568876	0.110035	0.906262	0.185694	0.14488	0.801029	0.997597	0.916894	0.855606	0.0231384	0.598584	0.859083	0.579007	0.0428326	0.978291	0.808936	0.891791	0.297788	0.992939	0.952905	0.0148189	0.841322	0.94843	0.792075	0.127322	0.902638	0.963795	0.989652	0.6305	0.985113	0.987085	-0.0224953	0.492301	0.744554	0.722825	0.00143409	0.236411	0.384881	0.898149	0.0110199	0.490362	0.646317	0.145924	0.000235063	0.00667498
776	986	RDN25-1	-0.0106907	0.912147	0.985618	0.905113	0.560683	0.77106	0.610277	0.995385	0.936444	0.997721	0.978758	0.181618	3.09624e-05	0.000728501	0.000720166	0.0315647	0.000964422	0.00378426	0.0266563	0.252903	0.0282955	0.0815166	0.104127	0.158385	0.56147	0.208137	0.546262	0.280082	0.421251	0.827511	0.88379	0.818652	0.90041	0.0362574	0.268312	0.52671	0.437756	0.76435	0.664125	0.898843	0.727195	0.895349	0.847873	0.959122	0.0521632	0.190664	0.553469
776	990	RDN25-1	0.0453802	0.639382	0.925834	0.530077	0.974026	0.703212	0.992365	0.99193	0.997597	0.997721	0.997298	0.15483	0.000394768	0.00607648	0.00106573	0.079675	0.00270431	0.0257509	0.0340464	0.406724	0.0577798	0.246085	-0.0383672	0.604107	0.870678	0.821603	0.313721	0.570636	0.28142	0.989652	0.775819	0.92627	0.856568	-0.00108903	0.973485	0.992831	0.671475	0.346775	0.848601	0.221547	0.871856	0.620794	0.942571	0.477233	0.0488924	0.220025	0.595476
776	1004	RDN25-1	0.00894457	0.926452	0.990409	0.99351	0.972951	0.969603	0.875492	0.998449	0.997597	0.999401	0.995705	0.142415	0.00112853	0.0145779	0.0130166	0.0324372	0.00885409	0.0160128	0.178165	0.257012	0.127849	0.189557	-0.0234711	0.751151	0.919133	0.683718	0.677153	0.646294	0.538767	0.961125	0.922364	0.944693	0.91261	-0.0219491	0.502871	0.749189	0.475875	0.515614	0.380785	0.227657	0.756629	0.758739	0.642713	0.486408	0.01261	0.751894	0.921749
776	1042	RDN25-1	0.0259077	0.789153	0.954673	0.495619	0.824617	0.659028	0.973473	0.99193	0.986331	0.995892	0.995705	0.0931375	0.0337231	0.194544	0.0100664	0.134711	0.0239968	0.149626	0.160897	0.505468	0.236793	0.566531	-0.0225325	0.760795	0.921007	0.782837	0.777503	0.966027	0.566922	0.989652	0.947044	0.99555	0.916489	0.0108408	0.740737	0.899369	0.209435	0.867255	0.449677	0.76349	0.485304	0.945567	0.704262	0.903513	0.00195503	0.960909	0.984215
776	1052	RDN25-1	0.272821	0.00410268	0.132492	0.0117109	0.000280699	0.011033	0.014464	0.384786	0.0351275	0.423761	0.493655	0.129262	0.0031476	0.032915	0.0363889	7.1566e-05	0.0277804	0.0439307	0.328626	0.00508312	0.259811	0.324298	0.0782625	0.289647	0.699918	0.454992	0.0273637	0.462224	0.545755	0.912525	0.392978	0.880874	0.91261	0.0495378	0.130319	0.324959	0.470062	0.00225595	0.459978	0.63013	0.750529	0.0159067	0.711909	0.825514	-0.112325	0.00472914	0.0592261
776	1056	RDN25-1	0.00685382	0.943611	0.994477	0.998228	0.690285	0.80187	0.667313	0.999369	0.951768	0.997721	0.981654	0.134152	0.00217198	0.024756	0.0170492	0.00511115	0.0399064	0.0864439	0.211346	0.0877916	0.303282	0.452539	-0.0389884	0.598259	0.870314	0.576298	0.97438	0.366227	0.254742	0.947676	0.996242	0.836691	0.842519	0.0724208	0.0268821	0.0937253	0.138708	0.0407599	0.312895	0.572426	0.373106	0.153024	0.578644	0.789263	-0.0362089	0.363852	0.724186
776	1110	RDN25-1	-0.00332018	0.972667	0.996313	0.851567	0.827501	0.801301	0.837946	0.995385	0.986331	0.997721	0.994181	0.0112891	0.797318	0.939215	0.927786	0.532455	0.823865	0.899431	0.982585	0.858462	0.960567	0.978982	0.00640101	0.93109	0.978625	0.90482	0.701002	0.839864	0.887783	0.993093	0.925325	0.967816	0.9709	-0.0116127	0.723011	0.890983	0.532705	0.774014	0.391651	0.453372	0.791378	0.903647	0.64902	0.698052	-0.0268718	0.500442	0.810349
776	1124	RDN25-1	-0.0850003	0.379515	0.837627	0.31208	0.376914	0.240212	0.287967	0.952625	0.898043	0.939331	0.943026	0.145622	0.000866987	0.01185	0.0186063	0.0257467	0.0248732	0.0119425	0.22226	0.226553	0.240319	0.158194	0.132977	0.0711625	0.373472	0.163775	0.154356	0.210935	0.159291	0.794667	0.670929	0.795318	0.772356	0.0075033	0.818863	0.930094	0.777934	0.957745	0.491994	0.689883	0.924729	0.984339	0.738438	0.86361	0.0103199	0.795847	0.93661
776	1133	RDN25-1	0.0573722	0.553471	0.903104	0.534094	0.537311	0.730502	0.608833	0.99193	0.931958	0.997721	0.978758	-0.0701218	0.110234	0.4092	0.242141	0.318579	0.0636943	0.124541	0.695001	0.731086	0.377001	0.519201	0.236031	0.00121883	0.0382364	0.00240094	0.00394667	0.00579621	0.00279835	0.260686	0.185185	0.35243	0.292244	0.108031	0.000943496	0.00447821	0.00932191	0.0268223	0.029869	0.00791901	0.0493911	0.112065	0.116118	0.0384679	-0.00925611	0.816496	0.942607
776	1437	RDN25-1	0.185078	0.0540198	0.464142	0.121061	0.102663	0.0619315	0.155066	0.81553	0.757754	0.813957	0.868651	0.0187121	0.670318	0.883521	0.895318	0.896893	0.656332	0.629525	0.97893	0.973579	0.916493	0.901085	0.147195	0.0455646	0.297968	0.133642	0.11269	0.0551383	0.178732	0.773946	0.620857	0.613257	0.788236	0.0256542	0.433564	0.695307	0.997614	0.779729	0.462908	0.665596	0.999105	0.905092	0.713503	0.846703	0.0107908	0.786751	0.935054
776	1449	RDN25-1	0.00534888	0.955979	0.99535	0.870532	0.372018	0.879887	0.867991	0.995385	0.892843	0.997721	0.995705	-0.0355041	0.419134	0.75394	0.656915	0.0246451	0.610131	0.240068	0.917777	0.224928	0.899084	0.6951	0.104267	0.157827	0.560217	0.154488	0.974343	0.147059	0.295263	0.790216	0.996242	0.755785	0.86051	0.00993084	0.761812	0.906952	0.628321	0.0837864	0.614012	0.750617	0.848524	0.253384	0.819469	0.895883	0.101508	0.0107291	0.105498
776	1450	RDN25-1	0.0222144	0.818652	0.96	0.680124	0.985189	0.836857	0.944721	0.99316	0.999646	0.997721	0.995705	-0.0258177	0.556926	0.837677	0.924365	0.451494	0.588191	0.262668	0.982585	0.807824	0.899084	0.713165	0.0626043	0.397235	0.780258	0.307087	0.624086	0.436993	0.671213	0.867306	0.903483	0.869408	0.929548	0.00500373	0.878621	0.957492	0.563506	0.774846	0.923285	0.531935	0.809674	0.903738	0.973482	0.758366	0.0202083	0.612385	0.852919
776	1888	RDN25-1	0.0419884	0.664645	0.936016	0.726067	0.650883	0.974004	0.671237	0.995385	0.947996	0.999477	0.981654	0.100474	0.021938	0.144528	0.0765333	0.871666	0.21286	0.0380875	0.441074	0.969035	0.649876	0.308297	0.176992	0.0159482	0.162642	0.0337678	0.310288	0.0764432	0.022125	0.578173	0.774768	0.685641	0.480481	0.0925751	0.00463275	0.0198186	0.0498838	0.971432	0.172462	0.0154484	0.186214	0.990657	0.404008	0.0668357	0.0906871	0.0227139	0.163005
776	2129	RDN25-1	-0.087882	0.36351	0.825806	0.20465	0.645851	0.365545	0.344512	0.911991	0.947996	0.979865	0.953919	0.12908	0.00319071	0.033229	0.110628	0.00593098	0.0118766	0.0134005	0.516756	0.0968113	0.150314	0.17263	0.127089	0.0847297	0.40838	0.304763	0.0551527	0.118737	0.128502	0.867306	0.534838	0.732091	0.74868	-0.0588742	0.0721089	0.205295	0.0208077	0.699607	0.11093	0.0840631	0.0950463	0.858342	0.303356	0.247152	-0.03841	0.335402	0.706677
776	2133	RDN25-1	0.0770209	0.426012	0.854855	0.6321	0.402162	0.471239	0.416311	0.99316	0.903623	0.979865	0.9646	0.128619	0.00330211	0.033991	0.0579182	0.0195696	0.0116797	0.00608948	0.401484	0.201152	0.149728	0.105471	0.0298738	0.68646	0.895433	0.974936	0.617529	0.739484	0.652105	0.996787	0.900913	0.964961	0.929523	0.0217687	0.506389	0.751033	0.900893	0.508274	0.646547	0.480948	0.96477	0.75512	0.842128	0.715703	-0.0133967	0.736969	0.914766
776	2142	RDN25-1	-0.0456985	0.637032	0.924821	0.670314	0.5831	0.6499	0.902629	0.99316	0.941893	0.995892	0.995705	-0.0402196	0.360029	0.702568	0.470291	0.378462	0.412377	0.887343	0.847789	0.772729	0.815104	0.973263	0.0987983	0.180906	0.59059	0.218329	0.323819	0.213291	0.092524	0.832214	0.783459	0.79846	0.702843	0.00473696	0.885046	0.958679	0.890397	0.867489	0.917818	0.327732	0.96275	0.945567	0.971221	0.599359	0.0136066	0.733005	0.913139
776	2191	RDN25-1	0.11547	0.231834	0.752218	0.761174	0.351872	0.462489	0.415889	0.995385	0.892077	0.979865	0.9646	0.00159262	0.971099	0.997721	0.124037	0.822096	0.430346	0.521341	0.534375	0.959776	0.824339	0.865914	0.0970029	0.189001	0.598119	0.873781	0.344285	0.476102	0.41487	0.990637	0.802111	0.889149	0.90041	-0.0113744	0.728468	0.891372	0.0315871	0.615318	0.187669	0.251714	0.131346	0.81582	0.428492	0.511605	0.0153389	0.700558	0.899859
776	2197	RDN25-1	0.00654843	0.94612	0.994818	0.792812	0.318342	0.817123	0.887108	0.995385	0.891056	0.997721	0.995705	-0.0518832	0.237576	0.595217	0.11062	0.419088	0.0997201	0.138179	0.516756	0.792283	0.480852	0.548237	0.0644162	0.383688	0.771591	0.707815	0.0556988	0.664374	0.580449	0.968644	0.537793	0.952004	0.921192	0.0777152	0.0175252	0.0646451	0.323366	0.00074964	0.229501	0.143121	0.628894	0.00643808	0.480197	0.364459	-0.100986	0.0111421	0.107631
776	2220	RDN25-1	0.117882	0.222164	0.745296	0.197822	0.686505	0.231008	0.304172	0.905288	0.951047	0.939331	0.943026	-0.0190582	0.664588	0.882709	0.949744	0.12475	0.761663	0.504179	0.986533	0.49152	0.951221	0.85894	-0.0573356	0.438221	0.797218	0.60934	0.127195	0.49925	0.365659	0.952173	0.6305	0.895638	0.890455	0.112695	0.000559516	0.00275905	0.00380656	0.47038	0.00317502	0.0105006	0.0228916	0.722888	0.0171334	0.0489284	0.0746596	0.0608854	0.30353
776	2256	RDN25-1	0.0999839	0.300939	0.803295	0.404044	0.490326	0.449701	0.389852	0.978595	0.922384	0.979865	0.963664	0.0483705	0.270894	0.621859	0.515545	0.710885	0.611747	0.468607	0.867048	0.927107	0.899084	0.836218	-0.0798669	0.279843	0.692564	0.252384	0.222278	0.192461	0.238379	0.851795	0.722954	0.790649	0.839759	0.051104	0.118585	0.304221	0.39689	0.632776	0.479705	0.322866	0.692582	0.827834	0.727027	0.59649	0.0257397	0.518669	0.817853
776	2258	RDN25-1	-0.00267814	0.977951	0.996843	0.821777	0.409951	0.842989	0.956515	0.995385	0.906098	0.997721	0.995705	0.0711975	0.104867	0.396321	0.347515	0.805124	0.281062	0.105866	0.78122	0.951828	0.714454	0.491549	-0.0191347	0.796005	0.931331	0.624971	0.223342	0.64284	0.889783	0.952173	0.723675	0.943986	0.971075	0.0585643	0.0736235	0.207456	0.395254	0.601413	0.300786	0.0851377	0.692023	0.808033	0.566844	0.248879	0.0861885	0.0304055	0.195382
776	2260	RDN25-1	0.00539122	0.955631	0.99535	0.95384	0.55359	0.431575	0.898608	0.996965	0.935373	0.979865	0.995705	0.0906709	0.0387437	0.212795	0.0887807	0.725277	0.917297	0.140249	0.473257	0.928887	0.985339	0.551906	0.0800399	0.2788	0.691404	0.322138	0.901048	0.944281	0.431975	0.868392	0.984139	0.991316	0.90041	0.0620487	0.0580151	0.174631	0.158644	0.890691	0.55193	0.259819	0.408742	0.955561	0.78228	0.521225	0.0693235	0.0818541	0.36048
776	2264	RDN25-1	0.00906256	0.925485	0.990409	0.989979	0.971185	0.949275	0.941465	0.997931	0.997597	0.998279	0.995705	0.0934401	0.0331472	0.193251	0.12134	0.186619	0.117119	0.0611012	0.530379	0.589052	0.512915	0.385069	-0.0452944	0.540399	0.848386	0.4952	0.501219	0.44161	0.551134	0.930226	0.871897	0.870306	0.913492	-0.0144807	0.658504	0.858732	0.576733	0.605633	0.449129	0.679087	0.820159	0.810389	0.704262	0.855532	0.0129673	0.745104	0.91924
776	2266	RDN25-1	0.227892	0.0171589	0.286911	0.0891731	0.108732	0.0148265	0.0134094	0.757209	0.763593	0.493215	0.479464	0.138202	0.00158273	0.0191249	0.117856	0.187811	0.00175418	0.00123514	0.527229	0.58911	0.0432303	0.0360661	0.00897074	0.90354	0.967261	0.573307	0.56719	0.74311	0.714351	0.947676	0.88379	0.964961	0.935384	-0.00461173	0.888065	0.959714	0.180919	0.234709	0.755696	0.695069	0.442695	0.49464	0.895754	0.866529	0.0584975	0.142163	0.480292
776	2278	RDN25-1	0.0702909	0.467657	0.876756	0.576083	0.383791	0.632492	0.526925	0.99316	0.900978	0.995892	0.968555	0.0179939	0.682268	0.888999	0.91397	0.494744	0.943178	0.806988	0.980658	0.834524	0.985339	0.952724	0.0259528	0.725841	0.91053	0.866044	0.56629	0.955576	0.799581	0.990136	0.88379	0.99444	0.957672	0.0797249	0.0148047	0.0556696	0.128331	0.051235	0.141613	0.0570033	0.352039	0.181627	0.356475	0.185862	-0.0237455	0.551588	0.827759
776	2280	RDN25-1	0.0179327	0.853166	0.969748	0.979017	0.980345	0.971409	0.93392	0.996965	0.998971	0.999477	0.995705	0.000372369	0.993241	0.999449	0.705907	0.74079	0.780462	0.852938	0.934294	0.933954	0.955239	0.963188	0.180867	0.0137496	0.148495	0.0469904	0.0611578	0.0331062	0.027587	0.64174	0.53998	0.531101	0.515687	0.073898	0.0239151	0.0852557	0.23076	0.314856	0.132199	0.0965385	0.51788	0.585236	0.339941	0.275249	0.0205952	0.605592	0.850307
776	2281	RDN25-1	0.184935	0.0542098	0.464142	0.262853	0.422206	0.127074	0.0691312	0.944125	0.908276	0.912294	0.789221	-0.000369007	0.993302	0.999449	0.18779	0.0995983	0.526564	0.961563	0.631089	0.44464	0.87671	0.995041	0.195923	0.00752367	0.106041	0.117003	0.257352	0.0345177	0.0125383	0.760271	0.753944	0.533603	0.430588	0.082164	0.0120072	0.0468066	0.789981	0.735384	0.19767	0.0385585	0.928237	0.886102	0.440981	0.137492	0.0999826	0.0119759	0.11271
776	2288	RDN25-1	0.32194	0.000640717	0.0422104	0.00157946	0.00808076	0.00118571	0.00169365	0.14614	0.316959	0.141638	0.136713	0.0392195	0.372107	0.715958	0.521824	0.893042	0.462192	0.609781	0.867048	0.973332	0.844087	0.892144	0.0565692	0.444378	0.798779	0.525457	0.915747	0.494489	0.589205	0.93919	0.98833	0.895638	0.926331	0.0640768	0.0502689	0.157252	0.182293	0.753368	0.120733	0.197645	0.444814	0.894241	0.319202	0.446382	0.0474248	0.234202	0.615692
776	2314	RDN25-1	0.105982	0.272721	0.79219	0.286266	0.228422	0.303415	0.480219	0.952625	0.891056	0.975159	0.967168	0.0674917	0.12427	0.43317	0.179238	0.13483	0.183386	0.501023	0.620675	0.505468	0.613154	0.857219	-0.0184246	0.803419	0.933848	0.866141	0.950284	0.803694	0.501322	0.990136	0.994562	0.965422	0.901827	-0.0086846	0.790961	0.918628	0.928012	0.77573	0.802523	0.266233	0.974735	0.903738	0.920572	0.529644	-0.0238262	0.550236	0.82687
776	2337	RDN25-1	-0.0172997	0.858295	0.970458	0.829808	0.703604	0.758184	0.776252	0.995385	0.95658	0.997721	0.98932	0.00875748	0.842087	0.955836	0.945527	0.805276	0.913888	0.95328	0.983791	0.951828	0.985339	0.99464	0.185079	0.0116651	0.134824	0.0257015	0.0593836	0.0287124	0.0256688	0.541726	0.53998	0.495547	0.507162	0.0704103	0.0314267	0.106831	0.141606	0.379757	0.155537	0.129449	0.377642	0.651863	0.379529	0.341071	0.0238259	0.550242	0.82687
776	2340	RDN25-1	0.18444	0.054869	0.464142	0.0649943	0.0602972	0.065377	0.0532858	0.740846	0.671445	0.830506	0.764667	0.131887	0.00258313	0.028082	0.0101792	0.0146873	0.00707006	0.00367787	0.160897	0.171149	0.112607	0.0798796	0.020726	0.77946	0.92691	0.747279	0.667337	0.777059	0.69409	0.980159	0.920622	0.965422	0.932074	0.0320048	0.328543	0.598001	0.398416	0.361244	0.396002	0.276748	0.692721	0.634077	0.654113	0.541544	-0.0165217	0.678708	0.886919
776	2347	RDN25-1	-0.0414176	0.668935	0.936421	0.709367	0.345531	0.686623	0.893484	0.995385	0.892077	0.997721	0.995705	0.0452301	0.303269	0.652919	0.373362	0.802681	0.361761	0.137464	0.796424	0.951486	0.784412	0.54742	-0.0511971	0.48888	0.822591	0.551637	0.197157	0.519096	0.765872	0.94709	0.708359	0.895638	0.950612	0.106977	0.00105889	0.00496156	0.0134773	0.378202	0.00670791	0.000499352	0.0669411	0.650042	0.0337063	0.00329723	0.0604649	0.129207	0.452439
776	2349	RDN25-1	0.0163869	0.8657	0.973848	0.73666	0.918718	0.910432	0.706096	0.995385	0.997597	0.997721	0.981654	0.0540655	0.218392	0.576287	0.176297	0.662362	0.598838	0.121724	0.619055	0.916741	0.899084	0.513838	0.136777	0.0633835	0.354913	0.0556594	0.20349	0.165413	0.0425006	0.647478	0.709245	0.778705	0.580699	0.0380012	0.245953	0.499626	0.203268	0.841984	0.798405	0.122161	0.476529	0.935222	0.918316	0.325929	0.027414	0.491834	0.805219
776	2351	RDN25-1	0.0862648	0.37244	0.832305	0.608953	0.38086	0.550932	0.581768	0.99316	0.898431	0.983595	0.978758	0.0222583	0.612569	0.862811	0.838773	0.617645	0.947374	0.868761	0.966331	0.892005	0.985339	0.966665	0.0262769	0.722557	0.908784	0.932416	0.690237	0.99265	0.958376	0.996787	0.925009	0.999972	0.984218	0.0275756	0.39991	0.664634	0.899462	0.500208	0.95924	0.942365	0.964012	0.750741	0.984579	0.980418	-0.00825866	0.835973	0.947836
776	2416	RDN25-1	0.0986672	0.307381	0.805672	0.280925	0.253474	0.445527	0.570021	0.94962	0.891056	0.979865	0.978758	0.135779	0.00191461	0.0219747	0.0053259	0.00841998	0.0204878	0.05228	0.103544	0.118966	0.209978	0.363155	-0.0614977	0.405647	0.786253	0.554337	0.66855	0.296393	0.19182	0.94709	0.921316	0.820226	0.800164	0.0661463	0.0432765	0.139212	0.0740499	0.0879654	0.254909	0.518147	0.244476	0.261508	0.513028	0.7445	-0.0244628	0.53963	0.826801
776	2417	RDN25-1	0.0378949	0.69564	0.937818	0.495391	0.967774	0.56864	0.868357	0.99193	0.997597	0.98966	0.995705	0.0299168	0.496049	0.798235	0.241527	0.952793	0.313667	0.856577	0.695001	0.991533	0.746664	0.963188	0.102806	0.163762	0.571372	0.095205	0.421791	0.118594	0.296652	0.714854	0.834248	0.732091	0.862392	0.100755	0.00204967	0.00931258	0.0025821	0.203858	0.00222137	0.0392519	0.0163512	0.453218	0.0124739	0.13942	0.0335327	0.400405	0.748969
776	2421	RDN25-1	0.110158	0.254163	0.769699	0.325528	0.310079	0.250402	0.372573	0.961935	0.891056	0.945948	0.958984	0.0478372	0.276218	0.626417	0.461138	0.442007	0.272835	0.568313	0.843333	0.803498	0.707111	0.880523	0.0335612	0.650178	0.883145	0.756247	0.705915	0.609749	0.861138	0.984844	0.928717	0.939224	0.966529	0.113559	0.000506804	0.00251039	0.0174664	0.0332609	0.00232751	0.0152376	0.0825571	0.130074	0.0129591	0.0660797	0.000868272	0.982633	0.993491
776	2619	RDN25-1	0.224059	0.0191739	0.304992	0.0146978	0.0186549	0.0345576	0.0344398	0.443975	0.449767	0.658695	0.660641	0.0235455	0.592165	0.854024	0.355721	0.414048	0.816942	0.823268	0.786448	0.789996	0.958448	0.956813	0.105452	0.15313	0.550053	0.106041	0.127088	0.235652	0.23591	0.737733	0.6305	0.808587	0.839759	0.103782	0.00149285	0.00690654	0.00343065	0.0140678	0.0202585	0.0183509	0.0207259	0.0680849	0.0851829	0.0763072	-0.0263833	0.508265	0.813126
776	2634	RDN25-1	-0.0194444	0.840946	0.965895	0.482035	0.890412	0.94343	0.915422	0.99193	0.997597	0.997918	0.995705	-0.0439857	0.316779	0.66829	0.069143	0.518637	0.52351	0.471993	0.428556	0.85133	0.87671	0.837905	0.0511643	0.48916	0.822591	0.975048	0.520001	0.422952	0.447041	0.996787	0.883318	0.865607	0.90041	0.0208295	0.52491	0.767445	0.459547	0.63304	0.405354	0.448044	0.742737	0.827834	0.664153	0.694072	-0.00455096	0.909164	0.971546
776	2640	RDN25-1	0.0231344	0.811278	0.957799	0.982518	0.56295	0.91818	0.775994	0.996965	0.936631	0.997721	0.98932	0.0237473	0.588994	0.850941	0.957085	0.301657	0.842943	0.547523	0.987493	0.716078	0.963255	0.873421	0.0378458	0.609034	0.871603	0.835017	0.37269	0.957361	0.578706	0.989652	0.820805	0.99444	0.920899	0.0824242	0.0117383	0.0459214	0.165454	0.0217342	0.217249	0.0227591	0.419299	0.0947224	0.466067	0.0903487	-0.0393793	0.323339	0.693862
776	2724	RDN25-1	-0.0239868	0.804461	0.957799	0.670237	0.742546	0.995635	0.594817	0.99316	0.970369	0.999984	0.978758	0.00169529	0.969237	0.997396	0.728757	0.316848	0.598722	0.562707	0.937942	0.731086	0.899084	0.879799	0.195832	0.00755201	0.106041	0.0292323	0.00292451	0.00483971	0.0325565	0.561371	0.167294	0.35243	0.535701	0.10421	0.00142652	0.00660892	0.0585016	0.00202507	0.00114061	0.0553357	0.2072	0.014742	0.0069227	0.181324	-0.0594337	0.135878	0.466719
776	2729	RDN25-1	-0.056477	0.559688	0.90356	0.625435	0.619047	0.505834	0.560702	0.99316	0.942558	0.979865	0.973266	0.0458108	0.297097	0.648104	0.337998	0.42642	0.490262	0.38058	0.777591	0.796419	0.859937	0.793782	0.0620671	0.401306	0.783265	0.406033	0.453761	0.521601	0.450104	0.900743	0.849793	0.896513	0.90041	0.0982291	0.00265344	0.0117796	0.019214	0.0566506	0.0281968	0.0135972	0.0893707	0.194104	0.111767	0.0607632	-0.0027844	0.944349	0.979435
776	2735	RDN25-1	0.0104662	0.913985	0.986136	0.651437	0.737193	0.95348	0.894863	0.99316	0.967145	0.998599	0.995705	0.0705383	0.108131	0.404572	0.806973	0.695748	0.184732	0.134374	0.958326	0.920658	0.613838	0.542451	0.159266	0.0303567	0.241533	0.206645	0.188845	0.0484864	0.0376128	0.824071	0.705579	0.592662	0.561628	0.0231148	0.480455	0.733034	0.439869	0.656749	0.639151	0.501394	0.727378	0.840406	0.836915	0.731629	0.0467115	0.24132	0.618342
776	2791	RDN25-1	0.162835	0.0906921	0.555373	0.156492	0.183692	0.135125	0.130956	0.86038	0.848651	0.912294	0.845243	-0.00352237	0.936134	0.986151	0.706409	0.693578	0.761002	0.775667	0.934294	0.920567	0.951221	0.944054	-0.0483671	0.513248	0.838306	0.424985	0.426158	0.447898	0.45421	0.909496	0.835779	0.870306	0.90041	0.0708527	0.0303739	0.103573	0.223248	0.343088	0.135043	0.11943	0.508843	0.616713	0.346237	0.320923	0.0205644	0.606132	0.85034
776	2793	RDN25-1	-0.00292168	0.975946	0.996313	0.935134	0.943607	0.966034	0.972205	0.995385	0.997597	0.999401	0.995705	-0.0227882	0.604132	0.861275	0.59827	0.841546	0.75566	0.740043	0.903594	0.966182	0.949725	0.933598	0.0992416	0.178947	0.587104	0.249598	0.203819	0.176942	0.177864	0.851795	0.709452	0.789876	0.788236	0.117855	0.000306677	0.00155415	0.0112589	0.015268	0.00154494	0.0013026	0.0577899	0.0725775	0.00908301	0.00792415	-0.0105687	0.791038	0.935151
776	2815	RDN25-1	0.119915	0.214237	0.736428	0.252033	0.35242	0.310414	0.323874	0.940828	0.892077	0.977591	0.943026	0.0367737	0.402685	0.743107	0.508452	0.783128	0.689524	0.733397	0.867048	0.947039	0.92705	0.929299	0.0155759	0.833331	0.944595	0.860401	0.959654	0.987008	0.954835	0.989652	0.995694	0.999725	0.984042	0.0760176	0.0201547	0.0736025	0.0923229	0.290443	0.135209	0.148377	0.280167	0.560825	0.346326	0.373598	0.019959	0.616779	0.855058
776	2826	RDN25-1	0.125819	0.192359	0.707069	0.370555	0.323487	0.329548	0.264296	0.96983	0.891056	0.979865	0.943026	0.113349	0.00968515	0.0803599	0.134111	0.123833	0.0812311	0.0400161	0.548977	0.49001	0.42729	0.316426	0.211571	0.00384059	0.0779971	0.0261793	0.0244103	0.0175449	0.0102681	0.541726	0.39116	0.417769	0.395025	-0.022138	0.499202	0.746315	0.213534	0.430721	0.216857	0.368072	0.491905	0.68851	0.465743	0.635099	0.0197472	0.620524	0.857135
776	2843	RDN25-1	-0.0147107	0.879327	0.979439	0.99679	0.617406	0.818418	0.568673	0.999197	0.942478	0.997721	0.978758	0.0481638	0.272949	0.624247	0.245383	0.055842	0.428848	0.921174	0.695001	0.338852	0.824339	0.985423	0.110735	0.133468	0.510618	0.12437	0.03792	0.19542	0.388568	0.770638	0.465672	0.790649	0.890455	-0.0253183	0.43961	0.699746	0.804332	0.414389	0.390778	0.077088	0.933025	0.67942	0.648335	0.232059	-0.0686084	0.0850633	0.370633
776	2865	RDN25-1	0.100162	0.300075	0.803295	0.336849	0.440007	0.517821	0.592894	0.961935	0.911332	0.979865	0.978758	0.108631	0.0131919	0.101528	0.0435728	0.132211	0.134548	0.200268	0.358566	0.504257	0.548129	0.648963	0.0310143	0.675156	0.891616	0.708435	0.87162	0.965671	0.848539	0.968644	0.974316	0.99555	0.966529	0.0129791	0.691997	0.877044	0.779039	0.939456	0.58894	0.394412	0.924729	0.976232	0.805692	0.653377	0.0170162	0.669652	0.883039
776	2870	RDN25-1	0.0927879	0.337237	0.821103	0.980827	0.229338	0.28122	0.528125	0.996965	0.891056	0.96429	0.968555	-0.042915	0.328714	0.679288	0.013087	0.921295	0.603423	0.144674	0.1782	0.982615	0.899084	0.557481	0.1721	0.0191573	0.181747	0.307813	0.0150426	0.0158624	0.0653832	0.867306	0.324032	0.41138	0.646328	0.0773546	0.0180572	0.0664586	0.769562	0.0313973	0.0172317	0.209884	0.919695	0.124829	0.073995	0.461849	-0.0368837	0.354973	0.719793
776	2880	RDN25-1	0.00366232	0.969851	0.996313	0.807742	0.963142	0.734044	0.698068	0.995385	0.997597	0.997721	0.981654	0.140243	0.00134503	0.0166562	0.00246931	0.0197637	0.000554131	0.000320276	0.0618034	0.201152	0.0189809	0.0135755	0.0334301	0.651454	0.883446	0.49967	0.688245	0.41507	0.378676	0.931858	0.924153	0.863232	0.890455	0.0038298	0.906949	0.965531	0.566729	0.92263	0.3796	0.307025	0.812085	0.970256	0.641535	0.580476	-0.00133361	0.973329	0.99108
776	2921	RDN25-1	0.143949	0.135351	0.630616	0.0912488	0.185106	0.341449	0.253696	0.757209	0.850454	0.979865	0.943026	0.0346379	0.430578	0.764184	0.222962	0.589784	0.792563	0.904067	0.669779	0.884675	0.957195	0.979496	-0.0517179	0.484464	0.820902	0.798442	0.537424	0.208444	0.306456	0.989652	0.88379	0.795318	0.864274	-0.0017272	0.957959	0.986553	0.512177	0.948783	0.212438	0.43301	0.775873	0.980093	0.461394	0.68181	0.0016878	0.966249	0.986617
776	2922	RDN25-1	0.143949	0.135351	0.630616	0.0766371	0.034499	0.174799	0.185262	0.743145	0.61259	0.914659	0.895797	0.0457075	0.298188	0.648767	0.113441	0.0343775	0.429387	0.46823	0.519898	0.26729	0.824339	0.836218	-0.0296978	0.688211	0.895433	0.905327	0.533985	0.648835	0.613394	0.993093	0.883318	0.945817	0.929523	-0.00562203	0.863761	0.951766	0.447829	0.142393	0.763397	0.686436	0.733206	0.368679	0.901261	0.861488	-0.0834167	0.0361798	0.218741
776	2923	RDN25-1	0.163095	0.0901708	0.555183	0.060133	0.0883377	0.0990423	0.0945641	0.728246	0.744076	0.896011	0.790816	0.0838418	0.0560495	0.275148	0.0322052	0.0898078	0.0776819	0.0681907	0.302269	0.425105	0.418599	0.400012	0.0257195	0.728208	0.910675	0.485819	0.60036	0.70761	0.689884	0.924568	0.893547	0.964131	0.932074	0.0223612	0.494884	0.745128	0.229066	0.429024	0.50732	0.470255	0.515399	0.686648	0.748943	0.709432	-0.0196783	0.621744	0.857135
776	2944	RDN25-1	0.0612663	0.526826	0.901809	0.699132	0.447188	0.601292	0.557568	0.995385	0.912316	0.995892	0.972322	0.0168917	0.700763	0.898219	0.937734	0.537209	0.857828	0.756249	0.983651	0.862503	0.966143	0.940545	0.011549	0.876014	0.960846	0.906935	0.708687	0.963806	0.89963	0.993093	0.928717	0.994797	0.97412	0.00239361	0.941763	0.980838	0.674459	0.662197	0.888501	0.98417	0.872968	0.841863	0.960431	0.996123	-0.0208299	0.601489	0.849963
776	2946	RDN25-1	-0.111678	0.247629	0.762315	0.364097	0.422234	0.203834	0.289104	0.965316	0.908276	0.931611	0.943026	-0.0343142	0.434902	0.768544	0.75634	0.883662	0.297118	0.54018	0.945051	0.973148	0.729702	0.869588	0.0260497	0.724859	0.909941	0.592625	0.552872	0.915627	0.700706	0.952173	0.88379	0.986985	0.932143	0.106532	0.00111142	0.00520031	0.00514548	0.0128154	0.0245258	0.00421599	0.0297848	0.0636652	0.100239	0.0222545	-0.0253756	0.524602	0.822195
776	2948	RDN25-1	-0.142818	0.138479	0.634355	0.116639	0.448236	0.221981	0.116175	0.813069	0.912316	0.936384	0.825156	-0.0150606	0.731879	0.909739	0.51951	0.444466	0.936539	0.525376	0.867048	0.803498	0.985339	0.865914	0.00373391	0.95977	0.988087	0.846042	0.449482	0.773562	0.874342	0.989652	0.848591	0.965422	0.970571	0.111531	0.000638675	0.00312136	0.0379513	0.00107809	0.000963656	0.0136185	0.150915	0.0087176	0.0059448	0.0607632	-0.0617358	0.121336	0.443837
776	2959	RDN25-1	-0.00160805	0.98676	0.997128	0.768057	0.538655	0.940842	0.821145	0.995385	0.931958	0.997721	0.994181	0.0614917	0.16146	0.490184	0.546186	0.0339638	0.155969	0.414337	0.884225	0.265645	0.574875	0.805214	0.0729567	0.323687	0.726312	0.590144	0.103369	0.298441	0.511455	0.952173	0.599677	0.820226	0.904963	0.0180272	0.582152	0.811387	0.803587	0.105304	0.492899	0.930562	0.932785	0.29566	0.738529	0.973327	-0.0679746	0.0879912	0.371118
776	2975	RDN25-1	0.107436	0.266158	0.783763	0.344934	0.140271	0.202297	0.574817	0.961935	0.786605	0.931276	0.978758	0.156671	0.000335499	0.00531315	0.00578406	0.000609169	0.000298345	0.0292534	0.107041	0.0239827	0.0124452	0.263395	0.166415	0.0235769	0.207653	0.0522934	0.0113002	0.0161268	0.136276	0.64174	0.286671	0.41138	0.752226	0.00804739	0.805981	0.923444	0.973953	0.261986	0.442933	0.271786	0.991672	0.530551	0.699268	0.536629	-0.0515418	0.196009	0.562596
805	807	RDN25-1	0.190538	0.0471934	0.447997	0.226833	0.190901	0.774219	0.657482	0.920972	0.863948	0.997721	0.981654	0.292107	1.0924e-11	1.24081e-09	0.739638	0.584576	0.00591354	0.20159	0.938192	0.882211	0.101772	0.650034	0.173941	0.0178896	0.174344	0.0798707	0.0673236	0.878079	0.428453	0.688809	0.54828	0.979314	0.90041	0.573038	1.2584e-82	4.60574e-80	7.1369e-14	2.27927e-09	8.50945e-35	1.57063e-26	1.25038e-11	1.66386e-07	3.72714e-32	4.58624e-24	0.322375	1.00128e-16	5.49701e-14
805	817	RDN25-1	-0.0782487	0.418651	0.854855	0.298215	0.0857009	0.338989	0.478127	0.952625	0.736087	0.979865	0.967168	0.0068134	0.876823	0.968117	0.667576	0.0999977	0.802696	0.791715	0.920997	0.445395	0.958216	0.946716	0.0651032	0.378625	0.765803	0.665738	0.626447	0.561692	0.364466	0.959472	0.90357	0.923005	0.890455	0.301538	4.37251e-21	2.40051e-19	2.65736e-10	0.000126116	1.91642e-13	3.02362e-16	1.5519e-08	0.00145365	1.32535e-11	2.94299e-14	0.106971	0.00715655	0.0783178
805	867	RDN25-1	-0.027689	0.775029	0.954043	0.126167	0.391178	0.301091	0.327145	0.816487	0.903406	0.975159	0.943729	0.0297108	0.499021	0.799265	0.0583414	0.563839	0.333526	0.389107	0.401484	0.872141	0.765407	0.797288	0.13827	0.0605243	0.347329	0.925893	0.392233	0.43918	0.394066	0.996787	0.833971	0.870306	0.897406	0.120143	0.00023309	0.00120534	0.807649	0.294615	0.281196	0.210424	0.933725	0.565145	0.542756	0.461849	0.0649155	0.103282	0.408909
805	876	RDN25-1	0.150514	0.118238	0.603491	0.980799	0.510021	0.854657	0.770253	0.996965	0.925006	0.997721	0.98932	0.15535	0.000377114	0.005832	0.889752	0.212802	0.782584	0.480695	0.97893	0.616888	0.955239	0.841056	0.302646	2.82486e-05	0.00186102	0.0455641	0.0074374	0.0726268	0.0154962	0.64174	0.232684	0.678334	0.430588	0.2707	3.7785e-17	1.24464e-15	0.00391344	0.00020825	0.00690141	6.10074e-05	0.0233739	0.0022124	0.0344154	0.000472942	0.0802697	0.0438411	0.244767
805	898	RDN25-1	-0.0200516	0.836047	0.964374	0.437013	0.611436	0.767295	0.724303	0.983998	0.941893	0.997721	0.984213	0.0765859	0.0810219	0.33635	0.768252	0.493486	0.182024	0.215934	0.94816	0.834524	0.611685	0.666113	0.0300023	0.685183	0.894921	0.70538	0.955309	0.802077	0.857334	0.968209	0.995461	0.965422	0.966529	0.154971	1.94987e-06	1.23517e-05	0.032244	0.0224456	0.000233798	0.000301199	0.133655	0.0971778	0.00165633	0.00208853	0.0348544	0.382084	0.738606
805	908	RDN25-1	0.092522	0.33863	0.821103	0.82549	0.639311	0.753591	0.542242	0.995385	0.947996	0.997721	0.969138	0.0639862	0.145091	0.467563	0.914836	0.719544	0.946355	0.497876	0.980658	0.927451	0.985339	0.855175	0.169479	0.0210966	0.191967	0.214763	0.136623	0.162907	0.0744262	0.83212	0.641052	0.778705	0.681691	0.185111	1.20505e-08	1.0152e-07	0.00834773	0.00632935	0.00143193	5.55932e-05	0.0449546	0.0360033	0.00847546	0.000438736	0.0420951	0.291065	0.66169
805	960	RDN25-1	-0.0119311	0.902002	0.983724	0.967738	0.590499	0.732004	0.670172	0.996965	0.941893	0.997721	0.981654	-0.0101248	0.817834	0.947375	0.964339	0.35655	0.505871	0.398152	0.987493	0.758731	0.865851	0.798175	-0.0996083	0.177339	0.585912	0.258757	0.0916749	0.120096	0.0950495	0.851795	0.575989	0.734505	0.706124	0.060288	0.06552	0.190656	0.126255	0.790597	0.347306	0.456457	0.347796	0.910069	0.608887	0.701093	0.0462112	0.246404	0.621481
805	966	RDN25-1	0.0908016	0.347726	0.821103	0.97255	0.329022	0.929867	0.966974	0.996965	0.892077	0.997721	0.995705	0.151292	0.000536894	0.00793063	0.282423	0.00632671	0.158068	0.244978	0.725635	0.101265	0.576948	0.697511	0.234344	0.00132435	0.0396583	0.0775263	0.00347821	0.0476379	0.0682264	0.682726	0.175783	0.591641	0.646328	0.00343897	0.916408	0.970626	0.040541	0.736183	0.0476292	0.0180539	0.15878	0.886253	0.166449	0.0754304	-0.0144718	0.716736	0.905206
805	986	RDN25-1	-0.0127567	0.895258	0.982666	0.887046	0.580452	0.710807	0.856544	0.995385	0.941893	0.997721	0.995705	-0.00291816	0.947072	0.990223	0.926656	0.414263	0.573972	0.86171	0.982585	0.789996	0.894991	0.964197	0.0856249	0.246513	0.655481	0.30478	0.654087	0.442915	0.30828	0.867306	0.913845	0.870306	0.864274	-0.0218363	0.505071	0.750102	0.591831	0.195386	0.236786	0.479031	0.824687	0.4465	0.490752	0.713659	0.0469635	0.238789	0.618342
805	990	RDN25-1	-0.0622291	0.520338	0.898721	0.731225	0.314376	0.598085	0.702824	0.995385	0.891056	0.995738	0.981654	0.0076305	0.862191	0.965502	0.525323	0.525391	0.747067	0.527389	0.867048	0.853264	0.946165	0.865914	0.0937247	0.204459	0.614497	0.139903	0.58333	0.195392	0.135573	0.777305	0.887706	0.790649	0.752226	0.00289079	0.929695	0.975913	0.508621	0.412507	0.775028	0.497459	0.775381	0.67942	0.905277	0.727503	0.0464251	0.244221	0.618342
805	1004	RDN25-1	0.0304302	0.753437	0.948897	0.68684	0.941189	0.837828	0.837626	0.995083	0.997597	0.997721	0.994181	-0.0225025	0.608676	0.862811	0.838505	0.319047	0.520652	0.514361	0.966331	0.731086	0.875201	0.86153	0.119806	0.1043	0.462367	0.106184	0.344282	0.161229	0.159123	0.737733	0.802111	0.778329	0.772356	0.0152132	0.642403	0.84984	0.547893	0.662545	0.886126	0.884467	0.801149	0.841863	0.960431	0.952224	0.0383966	0.33557	0.706677
805	1042	RDN25-1	-0.0528964	0.58488	0.908771	0.288982	0.485582	0.395919	0.390319	0.952625	0.920475	0.979865	0.963664	0.0394885	0.368834	0.712281	0.738432	0.780177	0.908594	0.91941	0.938192	0.947039	0.98506	0.985001	0.17173	0.0194216	0.181747	0.155538	0.0814678	0.077555	0.0775447	0.790216	0.570927	0.686637	0.681691	-0.0174025	0.595298	0.821497	0.0926279	0.453523	0.197217	0.181127	0.280445	0.711133	0.440721	0.423112	0.0224416	0.573653	0.842408
805	1052	RDN25-1	-0.0559598	0.563294	0.903857	0.533081	0.317702	0.475004	0.47238	0.99193	0.891056	0.979865	0.967168	-0.0722781	0.0996853	0.383155	0.130765	0.0418712	0.0731567	0.0686629	0.542036	0.295007	0.406353	0.401885	0.0968523	0.189692	0.598142	0.279728	0.602399	0.310833	0.309405	0.86612	0.89356	0.829184	0.864274	0.0221184	0.499583	0.746315	0.766323	0.574061	0.896578	0.898317	0.917493	0.794747	0.961818	0.959122	0.0519579	0.192418	0.555013
805	1056	RDN25-1	0.0205701	0.83187	0.96222	0.89122	0.471549	0.78053	0.966077	0.995385	0.919699	0.997721	0.995705	-0.0456743	0.298539	0.649101	0.333406	0.0184185	0.0574752	0.207931	0.777591	0.194392	0.354906	0.660247	0.0340694	0.645238	0.882975	0.733974	0.457982	0.850089	0.820668	0.97764	0.852718	0.967816	0.963473	0.0832069	0.0109614	0.0429332	0.0834726	0.777708	0.386686	0.0837676	0.263978	0.904454	0.646381	0.247152	0.098092	0.0136973	0.119859
805	1110	RDN25-1	0.0227002	0.814756	0.95822	0.452736	0.866859	0.662323	0.463723	0.983998	0.995518	0.995892	0.9646	-0.0670327	0.126856	0.437552	0.828602	0.240831	0.364547	0.756991	0.964052	0.649131	0.785709	0.940545	-0.0899269	0.223484	0.637314	0.671022	0.274307	0.388334	0.626873	0.959472	0.762541	0.850645	0.929523	0.0162128	0.620702	0.836234	0.107326	0.82677	0.336824	0.0794044	0.31063	0.928923	0.598709	0.23713	0.00457938	0.9086	0.971546
805	1124	RDN25-1	0.191229	0.0463821	0.442855	0.138327	0.146992	0.087931	0.151696	0.83761	0.79813	0.88126	0.865191	0.169503	0.000102706	0.00196694	0.0142348	0.0280179	0.00232568	0.0120391	0.187045	0.235243	0.05111	0.158194	0.20565	0.00498084	0.0891215	0.0380965	0.0474608	0.0167173	0.040791	0.610473	0.49435	0.417769	0.580699	-0.0379507	0.246582	0.499841	0.0827485	0.159464	0.149224	0.0275187	0.26241	0.394606	0.369265	0.103758	0.0368102	0.355933	0.719793
805	1133	RDN25-1	0.0825049	0.393714	0.843013	0.785647	0.660765	0.775127	0.515364	0.995385	0.948823	0.997721	0.968555	0.0444323	0.311885	0.662316	0.853849	0.880213	0.85607	0.56908	0.96959	0.971524	0.966143	0.880523	0.0616338	0.404607	0.785836	0.928375	0.760109	0.91742	0.56522	0.996787	0.942249	0.98791	0.916489	0.271465	3.05831e-17	1.04938e-15	4.84177e-07	4.77519e-06	1.45599e-08	1.51913e-11	8.65589e-06	0.000101203	2.83433e-07	5.18478e-10	0.0352332	0.37693	0.737129
805	1437	RDN25-1	-0.0521839	0.589954	0.910799	0.133043	0.343959	0.225341	0.134004	0.830605	0.892077	0.939331	0.845987	-0.0340908	0.4379	0.769438	0.0101465	0.168539	0.0339955	0.00626787	0.160897	0.568116	0.28183	0.105531	0.172407	0.0189409	0.181747	0.391684	0.152309	0.195145	0.348499	0.898992	0.668155	0.790649	0.885001	0.145218	8.35981e-06	4.97961e-05	0.344945	0.0704635	0.0601401	0.237375	0.651641	0.223106	0.196822	0.496673	0.0500396	0.209379	0.582223
805	1449	RDN25-1	0.0165486	0.864387	0.973848	0.307567	0.978429	0.712014	0.785345	0.952625	0.998971	0.997721	0.98932	0.00779994	0.859162	0.964581	0.0325441	0.848587	0.351534	0.458294	0.303283	0.96724	0.774705	0.830045	0.0378633	0.608868	0.871603	0.298362	0.831804	0.835985	0.935151	0.867306	0.959184	0.967816	0.978278	0.193779	2.35926e-09	2.15274e-08	0.0989824	0.000883249	0.000347258	9.10801e-05	0.29426	0.00743968	0.00235813	0.000689794	0.0194708	0.625425	0.858373
805	1450	RDN25-1	-0.0734581	0.447787	0.869339	0.121577	0.299674	0.365106	0.408187	0.81553	0.891056	0.979865	0.9646	-0.0546229	0.213674	0.569826	0.00816456	0.127373	0.13995	0.184303	0.137541	0.49664	0.557435	0.622554	0.029068	0.694489	0.898173	0.473348	0.913102	0.898026	0.814721	0.921614	0.986765	0.984852	0.963226	0.173716	9.16356e-08	6.8758e-07	0.048448	0.00998967	8.00962e-05	2.18564e-05	0.182374	0.0525057	0.000611898	0.000180625	0.0385154	0.334076	0.706469
805	1888	RDN25-1	0.0155516	0.872486	0.97648	0.997676	0.892548	0.926778	0.976165	0.999197	0.997597	0.997721	0.995705	0.0501853	0.253302	0.61019	0.515582	0.742704	0.612156	0.443256	0.867048	0.934783	0.899084	0.822653	0.079563	0.281683	0.693471	0.429731	0.567334	0.488674	0.393034	0.912525	0.88379	0.895638	0.897238	0.264418	2.08933e-16	5.68781e-15	9.43361e-09	5.97185e-06	5.82676e-10	2.89104e-11	3.21968e-07	0.000121659	1.78055e-08	9.26544e-10	0.0301474	0.449671	0.775911
805	2129	RDN25-1	0.0679517	0.482636	0.884788	0.903567	0.90678	0.917113	0.924671	0.995385	0.997597	0.997721	0.995705	0.0465008	0.289872	0.640012	0.868521	0.884751	0.827154	0.808954	0.97313	0.973148	0.961309	0.952905	0.0931407	0.207306	0.620225	0.64193	0.660949	0.649259	0.656677	0.953659	0.918548	0.945817	0.929523	-0.0273111	0.404447	0.668464	0.0630741	0.119749	0.032773	0.0272535	0.218093	0.324835	0.125185	0.102906	0.0553401	0.165004	0.511312
805	2133	RDN25-1	-0.0417989	0.666068	0.93613	0.503639	0.49945	0.627456	0.405488	0.99193	0.922384	0.995892	0.9646	0.0735495	0.0938516	0.369742	0.393931	0.487055	0.18622	0.531304	0.805643	0.832237	0.615215	0.865914	-0.0152963	0.83628	0.946483	0.597491	0.591712	0.770778	0.459723	0.952173	0.887706	0.96542	0.90041	-0.0447689	0.171609	0.387618	0.102904	0.152915	0.185503	0.0239581	0.30115	0.385119	0.424692	0.0941136	0.0311796	0.434296	0.769678
805	2142	RDN25-1	0.0673815	0.486326	0.88751	0.885797	0.531719	0.699533	0.744268	0.995385	0.929344	0.997721	0.986029	-0.0099021	0.821773	0.947375	0.245867	0.872972	0.446627	0.369271	0.695001	0.969035	0.829386	0.789852	0.102695	0.164219	0.571372	0.53604	0.233839	0.343187	0.382061	0.940396	0.737729	0.836691	0.890455	0.0487407	0.136626	0.335354	0.932914	0.357622	0.60159	0.708617	0.976771	0.632882	0.813679	0.873247	-0.000126953	0.997461	0.998406
805	2191	RDN25-1	-0.0283796	0.769572	0.954043	0.978215	0.558076	0.920748	0.964532	0.996965	0.935373	0.997721	0.995705	-0.0302562	0.491173	0.796958	0.930062	0.286256	0.809201	0.95704	0.982585	0.696247	0.958216	0.995041	0.0313088	0.672249	0.891616	0.486211	0.966738	0.531251	0.414397	0.924568	0.995694	0.901422	0.90041	-0.0179428	0.58392	0.811825	0.864486	0.319925	0.994407	0.699884	0.957682	0.592922	0.995925	0.870021	0.034919	0.381202	0.737766
805	2197	RDN25-1	0.0688834	0.476639	0.879086	0.448456	0.560255	0.41551	0.300475	0.983998	0.936444	0.979865	0.943026	-0.0163371	0.710138	0.900637	0.905329	0.714569	0.965661	0.682736	0.979565	0.927107	0.991339	0.917676	-0.0476395	0.519614	0.841542	0.644001	0.535554	0.672177	0.886534	0.953659	0.88379	0.954313	0.9709	0.0387145	0.237194	0.487106	0.274316	0.538362	0.182431	0.0528939	0.570787	0.772456	0.41939	0.17463	0.00602219	0.879994	0.962316
805	2220	RDN25-1	-0.0616307	0.524365	0.901809	0.358167	0.114056	0.632083	0.494427	0.965316	0.77054	0.995892	0.968555	-0.0174217	0.691847	0.891955	0.339365	0.0384649	0.926043	0.607123	0.777591	0.280794	0.985339	0.892144	-0.010192	0.890485	0.963936	0.58858	0.168604	0.973772	0.818465	0.952173	0.693421	0.996912	0.963473	0.263791	2.47216e-16	6.51465e-15	1.12746e-07	0.00245159	1.01318e-12	1.43712e-11	2.53821e-06	0.0168219	6.05147e-11	5.03566e-10	0.108698	0.00627292	0.0724527
805	2256	RDN25-1	0.132617	0.16923	0.667597	0.174549	0.202549	0.215603	0.22382	0.886505	0.872622	0.935424	0.931423	-0.0906545	0.0387793	0.212795	0.123236	0.156948	0.0498872	0.0411876	0.534375	0.552893	0.33125	0.316426	-0.00725214	0.921954	0.976501	0.992857	0.973422	0.858102	0.831125	0.997637	0.996242	0.970635	0.96523	0.108807	0.000866209	0.00414121	0.00847074	0.0326114	0.00992958	0.0102477	0.0455237	0.128056	0.0471028	0.0480054	-0.00436465	0.912868	0.973929
805	2258	RDN25-1	0.1313	0.173543	0.673322	0.372836	0.1583	0.232325	0.229689	0.96983	0.814069	0.939331	0.931423	0.141322	0.00123314	0.0154447	0.055517	0.00777594	0.00801719	0.00705998	0.397575	0.114163	0.118662	0.11213	0.0605166	0.413194	0.789084	0.793931	0.349709	0.522932	0.51825	0.989652	0.804107	0.898213	0.905631	0.144739	8.95843e-06	5.26948e-05	0.01676	0.00176845	0.000628229	0.00046132	0.0800825	0.0130548	0.00404653	0.00309272	-0.0204584	0.60799	0.850773
805	2260	RDN25-1	-0.0434735	0.653535	0.932338	0.530751	0.248458	0.704086	0.43649	0.99193	0.891056	0.997721	0.9646	0.0111676	0.799453	0.940835	0.843676	0.251562	0.750381	0.617462	0.968624	0.658676	0.948078	0.895856	0.049972	0.499353	0.82802	0.729498	0.71838	0.48929	0.85606	0.97533	0.931119	0.895638	0.966529	-0.0620687	0.0579341	0.174597	0.0594451	0.00698333	0.147815	0.0117199	0.209237	0.0389643	0.366469	0.0535652	0.0810914	0.0417195	0.23817
805	2264	RDN25-1	0.104369	0.280126	0.7975	0.940416	0.595712	0.394824	0.60974	0.995608	0.941893	0.979865	0.978758	0.062646	0.153721	0.481785	0.524495	0.801914	0.367896	0.839602	0.867048	0.951106	0.787893	0.962546	-0.0748094	0.311519	0.717832	0.0352646	0.158093	0.241037	0.104621	0.586553	0.673686	0.809322	0.721638	-0.0674679	0.039255	0.128407	0.000219571	0.030591	0.0314607	0.00194394	0.00179202	0.122389	0.121029	0.0113024	0.0473543	0.234899	0.616916
805	2266	RDN25-1	-0.071367	0.460852	0.873333	0.359812	0.506811	0.390212	0.658757	0.965316	0.924285	0.979865	0.981654	0.0185507	0.672996	0.883521	0.921276	0.764999	0.963852	0.35958	0.982585	0.940284	0.991339	0.787075	-0.0504761	0.495029	0.826783	0.362311	0.557831	0.398476	0.760381	0.883342	0.88379	0.853057	0.948148	-0.0488176	0.136007	0.334334	0.102393	0.355398	0.100746	0.565139	0.300659	0.63022	0.284676	0.78354	0.000276531	0.994469	0.998406
805	2278	RDN25-1	-0.0547358	0.571874	0.908626	0.370254	0.43098	0.602661	0.552242	0.96983	0.911332	0.995892	0.971173	0.0647601	0.140279	0.458435	0.624446	0.572541	0.182689	0.22951	0.91474	0.874317	0.612044	0.679993	-0.00363906	0.960791	0.988444	0.605711	0.694957	0.979513	0.905151	0.952173	0.925325	0.999074	0.97412	0.0160162	0.624946	0.840018	0.613391	0.787502	0.657039	0.791266	0.837398	0.9087	0.847873	0.917334	0.030339	0.446794	0.775796
805	2280	RDN25-1	0.103391	0.284682	0.7975	0.518415	0.695435	0.724627	0.71984	0.99193	0.953894	0.997721	0.982726	0.0414607	0.345385	0.69035	0.926374	0.744159	0.598137	0.600621	0.982585	0.93594	0.899084	0.891498	0.085711	0.246037	0.65517	0.545136	0.777568	0.818581	0.812343	0.94516	0.947044	0.967816	0.962522	0.154755	2.0156e-06	1.27436e-05	0.00727993	0.075267	0.0262243	0.022269	0.0401083	0.233487	0.105217	0.088671	0.0613606	0.12362	0.445518
805	2281	RDN25-1	-0.00695162	0.942808	0.994477	0.326327	0.496316	0.620601	0.312114	0.961935	0.922384	0.995892	0.943026	0.0964287	0.0278959	0.171435	0.978213	0.622113	0.28692	0.98784	0.98989	0.892852	0.723634	0.998151	0.0968252	0.189817	0.598142	0.981736	0.72462	0.498878	0.988341	0.996787	0.93409	0.895638	0.99648	0.272879	2.06592e-17	7.23952e-16	3.34737e-05	5.9824e-05	2.61253e-09	2.16282e-06	0.000343628	0.00080213	6.13012e-08	2.30338e-05	0.0664973	0.0951313	0.389788
805	2288	RDN25-1	-0.0429486	0.657453	0.932919	0.413617	0.33844	0.38355	0.259056	0.978595	0.892077	0.979865	0.943026	0.0588017	0.180631	0.522685	0.756098	0.978543	0.797092	0.79024	0.945051	0.995977	0.958216	0.946609	0.174579	0.0174673	0.172267	0.100227	0.181256	0.0995184	0.184533	0.728992	0.705579	0.718301	0.789349	0.22477	3.67349e-12	4.91889e-11	2.80233e-05	0.00156138	4.20847e-06	5.45207e-05	0.000294581	0.0117911	4.40631e-05	0.000431567	0.0604402	0.129363	0.452439
805	2314	RDN25-1	0.150223	0.118959	0.603491	0.571635	0.173376	0.548539	0.207722	0.99316	0.830892	0.983595	0.914411	-0.0811893	0.0643135	0.300201	0.00123256	0.161735	0.000586949	0.0337437	0.0372319	0.556806	0.0197757	0.282415	0.0912748	0.216593	0.628509	0.99085	0.313562	0.985351	0.384413	0.996787	0.775819	0.999725	0.890455	0.0108539	0.740436	0.899335	0.0668136	0.900147	0.0459567	0.753	0.22738	0.958976	0.16263	0.896669	0.00418346	0.916472	0.974918
805	2337	RDN25-1	0.103384	0.284718	0.7975	0.652996	0.247178	0.812328	0.895073	0.99316	0.891056	0.997721	0.995705	0.0908811	0.0382925	0.211637	0.524995	0.0657963	0.815551	0.986883	0.867048	0.364795	0.958216	0.998151	-0.080709	0.274788	0.687282	0.0914577	0.492181	0.042675	0.0295984	0.706384	0.866615	0.578755	0.520575	0.29787	1.36373e-20	7.13038e-19	1.90634e-08	6.42617e-10	9.70381e-09	2.3529e-08	5.56651e-07	6.03142e-08	1.93194e-07	3.84064e-07	-0.0213514	0.592415	0.848107
805	2340	RDN25-1	-0.0321897	0.739676	0.945193	0.665674	0.61025	0.48295	0.613484	0.99316	0.941893	0.979865	0.978758	0.109075	0.0128197	0.0991268	0.0722153	0.156629	0.160228	0.0664894	0.432305	0.552893	0.579999	0.398028	0.0103253	0.889062	0.96391	0.975878	0.884603	0.712611	0.909867	0.996787	0.979185	0.964473	0.97637	0.0503923	0.12381	0.313475	0.397906	0.604578	0.782421	0.421765	0.692721	0.8095	0.907415	0.673266	0.0229009	0.565833	0.838365
805	2347	RDN25-1	0.136323	0.157521	0.652395	0.311341	0.364404	0.112031	0.240807	0.952625	0.892843	0.912294	0.941351	0.0499168	0.255853	0.612562	0.735027	0.859305	0.131964	0.512403	0.937942	0.967482	0.541032	0.860393	0.0413877	0.575917	0.859332	0.905824	0.978914	0.400091	0.763504	0.993093	0.996242	0.853057	0.948694	0.183524	1.61101e-08	1.32999e-07	0.000548383	0.00585613	1.09322e-07	1.5383e-05	0.00410584	0.0338923	1.65113e-06	0.000131255	0.0391007	0.326778	0.698238
805	2349	RDN25-1	0.144576	0.133638	0.630616	0.264882	0.101567	0.149918	0.247117	0.944125	0.757754	0.912294	0.943026	0.110171	0.0119408	0.0943658	0.131564	0.0201762	0.0245735	0.0920268	0.54278	0.201666	0.239182	0.463643	0.134583	0.0677837	0.36433	0.194634	0.0542665	0.0836039	0.171299	0.809453	0.528644	0.700438	0.788236	0.116163	0.000374546	0.00188647	0.050191	0.00534029	0.00290672	0.021998	0.186523	0.0316088	0.0159143	0.0882157	-0.0314032	0.431007	0.768256
805	2351	RDN25-1	0.0518404	0.592407	0.910866	0.701397	0.291633	0.896829	0.909266	0.995385	0.891056	0.997721	0.995705	-0.00702272	0.873071	0.967723	0.0661788	0.367502	0.359896	0.336251	0.420092	0.768452	0.782305	0.778524	0.167253	0.0228748	0.202009	0.345559	0.00770456	0.099883	0.102367	0.878741	0.233029	0.718301	0.719605	0.00196046	0.952288	0.984878	0.0435843	0.228074	0.355468	0.323775	0.168193	0.486598	0.61785	0.59649	-0.0620408	0.119505	0.44173
805	2416	RDN25-1	-0.0188329	0.845885	0.96663	0.96288	0.419799	0.931501	0.9185	0.996965	0.908276	0.997721	0.995705	0.000499089	0.990941	0.999449	0.653093	0.266858	0.572933	0.856201	0.917777	0.67498	0.894991	0.963188	0.0888572	0.229062	0.640598	0.167267	0.811175	0.140231	0.215362	0.799232	0.955671	0.748516	0.826234	0.114175	0.000472076	0.00234543	0.00188761	0.383921	0.000337528	0.00152731	0.0124327	0.655585	0.00230396	0.00908091	0.0682788	0.0865756	0.37093
805	2417	RDN25-1	0.00266233	0.978081	0.996843	0.827786	0.973219	0.840077	0.976665	0.995385	0.997597	0.997721	0.995705	0.0774491	0.0776459	0.329953	0.33108	0.243465	0.0553661	0.143505	0.777131	0.650907	0.34726	0.555882	-0.0412429	0.577255	0.859332	0.414859	0.583203	0.768284	0.551164	0.905115	0.887706	0.96542	0.913492	0.195086	1.8329e-09	1.7201e-08	0.000108941	0.000319721	5.61195e-08	7.68471e-07	0.000978694	0.00319478	9.04798e-07	8.74261e-06	0.00629172	0.874666	0.959915
805	2421	RDN25-1	0.0360801	0.709546	0.940638	0.990234	0.450885	0.596811	0.623756	0.997931	0.912316	0.995738	0.978758	0.0733779	0.0946227	0.37129	0.501734	0.0517661	0.0666881	0.0757386	0.861744	0.328473	0.386341	0.419947	-0.0626887	0.396597	0.780258	0.22007	0.841269	0.571074	0.534254	0.832214	0.964597	0.926409	0.91261	0.279145	3.52953e-18	1.42092e-16	2.13193e-08	4.15939e-10	1.63986e-14	9.91175e-15	6.08991e-07	4.37235e-08	1.30593e-12	7.89336e-13	-0.045382	0.254992	0.629503
805	2619	RDN25-1	0.0565297	0.559321	0.90356	0.647205	0.195824	0.858782	0.815993	0.99316	0.864916	0.997721	0.993411	0.0334162	0.447025	0.774592	0.648877	0.0563328	0.920394	0.991323	0.917777	0.338852	0.985339	0.998448	0.0694714	0.3474	0.743874	0.457644	0.0778306	0.693636	0.641078	0.912525	0.564716	0.962956	0.929523	0.137274	2.55802e-05	0.000146033	0.00370772	3.12073e-05	0.0119875	0.00672547	0.0223484	0.000482428	0.0552689	0.0333482	-0.0830637	0.0369781	0.221465
805	2634	RDN25-1	0.0777031	0.421913	0.854855	0.533963	0.611003	0.511528	0.54726	0.99193	0.941893	0.979865	0.969138	-0.0950324	0.030253	0.180532	0.0438879	0.0532254	0.0333653	0.0229366	0.358566	0.33146	0.280848	0.231502	0.133795	0.0694243	0.368462	0.136743	0.197353	0.117666	0.133681	0.776331	0.708359	0.731315	0.75067	-0.0866995	0.0080229	0.0323469	0.024696	0.0389167	0.0138322	0.00770561	0.108168	0.14767	0.0622447	0.0375702	0.0228664	0.566419	0.838365
805	2640	RDN25-1	0.297703	0.00166721	0.078454	0.0478655	0.0259404	0.0195277	0.0663103	0.706629	0.549768	0.546217	0.788575	0.0580895	0.185977	0.531778	0.426212	0.895003	0.836961	0.208678	0.825496	0.973332	0.963255	0.660728	0.195923	0.00752371	0.106041	0.232349	0.127001	0.100218	0.318629	0.836055	0.6305	0.718301	0.864274	0.27	4.58187e-17	1.47967e-15	7.79559e-05	7.43135e-05	1.51106e-07	5.3676e-05	0.000747694	0.000938923	2.18191e-06	0.000426164	0.0661275	0.0969896	0.394424
805	2724	RDN25-1	0.128036	0.184577	0.69406	0.199282	0.113077	0.373323	0.277495	0.905288	0.769123	0.979865	0.943026	0.0294946	0.502152	0.801111	0.522217	0.238541	0.868015	0.817592	0.867048	0.646337	0.970446	0.95501	-0.0222571	0.763632	0.921451	0.831867	0.814826	0.447901	0.60756	0.989652	0.955671	0.870306	0.929523	0.203036	3.79836e-10	4.03606e-09	2.19213e-06	2.96301e-06	2.28587e-05	1.3375e-06	3.14805e-05	6.9525e-05	0.000200242	1.47807e-05	-0.0425342	0.286058	0.657553
805	2729	RDN25-1	0.117769	0.22261	0.745296	0.339306	0.116669	0.368782	0.305656	0.961935	0.778651	0.979865	0.943026	0.0649934	0.138853	0.455704	0.389737	0.0569723	0.439123	0.299094	0.805643	0.339451	0.829386	0.744531	-0.0287647	0.69752	0.898722	0.560063	0.794951	0.48486	0.586768	0.94709	0.952202	0.893558	0.925586	0.246154	2.3392e-14	4.64176e-13	1.77223e-07	1.25553e-08	1.48215e-08	9.93194e-10	3.81757e-06	6.34526e-07	2.86404e-07	2.1751e-08	-0.0512526	0.198532	0.566204
805	2735	RDN25-1	0.0173697	0.857727	0.970458	0.938129	0.82021	0.817113	0.949595	0.995461	0.986331	0.997721	0.995705	0.0551865	0.20898	0.562863	0.392996	0.827791	0.217556	0.36775	0.805643	0.961991	0.653274	0.789852	0.0650257	0.379194	0.766299	0.494171	0.789169	0.367068	0.491157	0.928957	0.949859	0.836691	0.90041	-0.00281639	0.9315	0.976252	0.785727	0.399849	0.930979	0.723294	0.927207	0.669234	0.977975	0.880823	0.0419177	0.293105	0.663649
805	2791	RDN25-1	-0.0229542	0.812721	0.957799	0.898189	0.350003	0.977989	0.823377	0.995385	0.892077	0.999477	0.994181	-0.0311572	0.478353	0.791692	0.924255	0.0739667	0.825005	0.529409	0.982585	0.39509	0.960618	0.865914	-0.178757	0.0149115	0.157098	0.076971	0.00282915	0.0424486	0.0218427	0.682726	0.167294	0.578755	0.480481	0.201051	5.66175e-10	5.72865e-09	6.9431e-08	0.0180182	1.67869e-08	1.48657e-07	1.67399e-06	0.0819234	3.19682e-07	2.03474e-06	0.0779219	0.0504098	0.268255
805	2793	RDN25-1	0.0310687	0.748434	0.946025	0.909987	0.470987	0.874841	0.586024	0.995385	0.919699	0.997721	0.978758	0.0390363	0.374347	0.717151	0.713531	0.159978	0.629378	0.19722	0.935933	0.556806	0.907975	0.646389	-0.0259458	0.725913	0.91053	0.579423	0.809413	0.604899	0.984065	0.947901	0.955671	0.936539	0.99428	0.170969	1.46588e-07	1.08508e-06	0.00057256	3.64235e-05	7.11983e-05	3.9024e-07	0.00425053	0.000546977	0.00055522	4.90694e-06	-0.0468212	0.240216	0.618342
805	2815	RDN25-1	0.0293221	0.762143	0.951156	0.654907	0.922806	0.775685	0.914207	0.99316	0.997597	0.997721	0.995705	-0.0539029	0.219782	0.576287	0.494628	0.23371	0.277373	0.0553612	0.858315	0.642458	0.713785	0.370575	-0.0241082	0.744628	0.917028	0.932661	0.620073	0.758456	0.413093	0.996787	0.9018	0.964961	0.90041	0.233399	5.06811e-13	7.83772e-12	1.02251e-08	3.823e-05	2.16764e-09	3.67819e-07	3.44509e-07	0.000567618	5.22619e-08	4.64725e-06	0.0188524	0.636449	0.864878
805	2826	RDN25-1	-0.0564135	0.56013	0.90356	0.26202	0.553959	0.229199	0.159956	0.944125	0.935373	0.939331	0.874023	0.0840564	0.0554214	0.274219	0.656477	0.209402	0.719873	0.961617	0.917777	0.612133	0.941837	0.995041	-0.0717122	0.332032	0.733066	0.105561	0.359943	0.080709	0.0440715	0.737733	0.811007	0.700011	0.580699	-0.0268398	0.412608	0.674507	0.0502504	0.518126	0.0188593	0.00348132	0.186523	0.760265	0.0801977	0.0186713	0.00751045	0.85065	0.953075
805	2843	RDN25-1	-0.00524145	0.956862	0.99535	0.671552	0.794681	0.864366	0.928059	0.99316	0.984347	0.997721	0.995705	-0.0274105	0.532845	0.817508	0.217592	0.410588	0.426877	0.523679	0.665694	0.789996	0.823989	0.865914	-0.07458	0.313009	0.718018	0.164058	0.260074	0.271953	0.317495	0.794667	0.753944	0.815631	0.864274	-0.0515149	0.115648	0.298781	0.0421574	0.161383	0.10816	0.152889	0.163407	0.397483	0.298577	0.379407	0.0228888	0.566038	0.838365
805	2865	RDN25-1	0.00674657	0.944492	0.994477	0.985677	0.818616	0.929231	0.948841	0.997059	0.986331	0.997721	0.995705	0.0296347	0.500123	0.799794	0.645263	0.975263	0.781652	0.549669	0.917777	0.995443	0.955239	0.874413	0.0380261	0.607328	0.871603	0.684618	0.940171	0.778813	0.630732	0.961125	0.992276	0.965422	0.929523	-0.0550538	0.0926575	0.249358	0.177901	0.103139	0.0739581	0.154305	0.438952	0.292393	0.231108	0.381839	0.0315288	0.429166	0.766633
805	2870	RDN25-1	-0.00413037	0.966	0.99535	0.852707	0.968713	0.554385	0.981002	0.995385	0.997597	0.983595	0.995836	0.020524	0.640541	0.877315	0.413521	0.73843	0.473601	0.651315	0.820677	0.932978	0.849795	0.908404	-0.0250644	0.734869	0.913656	0.984317	0.771421	0.303986	0.766565	0.996787	0.947017	0.823258	0.950612	-0.0679777	0.0377908	0.124608	0.316303	0.199606	0.0017322	0.0874253	0.622654	0.448218	0.00998295	0.254716	0.000109986	0.9978	0.998406
805	2880	RDN25-1	-0.0149344	0.877506	0.978903	0.915808	0.469024	0.455173	0.587788	0.995385	0.91918	0.979865	0.978758	0.0566662	0.197011	0.548151	0.259559	0.913818	0.92597	0.737852	0.70177	0.97941	0.985339	0.932248	0.0350195	0.636046	0.879381	0.633278	0.743946	0.73935	0.947037	0.953659	0.939398	0.964961	0.981274	-0.0562049	0.0860236	0.234765	0.239816	0.0244633	0.00304417	0.0129393	0.530057	0.104197	0.016495	0.0586282	0.0632593	0.112401	0.428528
805	2921	RDN25-1	0.0531024	0.583417	0.908771	0.761799	0.90703	0.857677	0.513554	0.995385	0.997597	0.997721	0.968555	0.0763423	0.0819957	0.338888	0.878469	0.860908	0.403548	0.0677298	0.976731	0.967482	0.810179	0.399089	-0.0669249	0.365401	0.755574	0.0631328	0.125462	0.198013	0.49544	0.647478	0.6305	0.790649	0.901827	0.0545012	0.0959845	0.256426	0.498143	0.832811	0.619269	0.0802653	0.767528	0.931333	0.823421	0.238887	0.0656834	0.0992588	0.399232
805	2922	RDN25-1	0.0531024	0.583417	0.908771	0.814612	0.832408	0.969774	0.413844	0.995385	0.989976	0.999401	0.9646	0.0436078	0.320959	0.670567	0.781803	0.596224	0.788363	0.134119	0.951194	0.884741	0.957145	0.542451	0.0455467	0.538143	0.848386	0.836584	0.725329	0.884995	0.336516	0.989652	0.93409	0.981238	0.882627	0.0433386	0.185723	0.410341	0.742462	0.53895	0.730797	0.0586757	0.907952	0.7727	0.880579	0.189195	0.075884	0.0567604	0.29114
805	2923	RDN25-1	-0.0528964	0.58488	0.908771	0.218667	0.419563	0.293766	0.718496	0.920972	0.908276	0.972703	0.982726	0.0778403	0.0761537	0.328619	0.957745	0.474977	0.634869	0.0554127	0.987493	0.822976	0.910637	0.370575	0.000436531	0.995295	0.998325	0.360233	0.695852	0.495945	0.832202	0.880645	0.925325	0.895638	0.96523	0.0319732	0.329022	0.598001	0.332338	0.96497	0.573752	0.214355	0.63823	0.989371	0.795263	0.465782	0.0343054	0.389631	0.740714
805	2944	RDN25-1	0.170112	0.0769845	0.532441	0.121647	0.0302242	0.222718	0.170749	0.81553	0.585328	0.937984	0.880117	0.0182517	0.67797	0.88624	0.886759	0.186524	0.561489	0.775356	0.978225	0.589052	0.888245	0.944054	0.195585	0.00762958	0.106041	0.0216355	0.002636	0.0564738	0.0350931	0.541726	0.164938	0.618916	0.552826	-0.0174601	0.594082	0.820505	0.528645	0.396818	0.103254	0.200153	0.787118	0.667557	0.289596	0.449875	-0.0624277	0.117212	0.435773
805	2946	RDN25-1	0.0050689	0.958281	0.99535	0.876484	0.476287	0.774319	0.932324	0.995385	0.919699	0.997721	0.995705	-0.0220801	0.615419	0.864474	0.420493	0.0884588	0.257733	0.706794	0.823438	0.422182	0.69185	0.920765	-0.0256812	0.728598	0.910816	0.565395	0.213749	0.447925	0.778778	0.94709	0.71743	0.870306	0.953502	0.239654	1.14676e-13	2.02001e-12	5.39202e-07	0.00226263	1.21311e-07	1.70998e-10	9.51022e-06	0.0159067	1.79104e-06	4.4057e-09	0.0818909	0.039739	0.232918
805	2948	RDN25-1	0.0232978	0.80997	0.957799	0.762018	0.946671	0.978298	0.959455	0.995385	0.997597	0.999477	0.995705	-0.0423453	0.335181	0.683613	0.070778	0.233106	0.169909	0.218792	0.429572	0.642458	0.596605	0.666113	-0.0601112	0.416336	0.790194	0.158966	0.295253	0.27563	0.31973	0.792955	0.766773	0.815715	0.864274	0.268567	6.78682e-17	2.10107e-15	7.3523e-07	4.1384e-06	3.41076e-10	3.533e-11	1.20762e-05	9.0631e-05	1.09311e-08	1.10532e-09	0.0305238	0.444029	0.773786
805	2959	RDN25-1	-0.0637778	0.509989	0.896427	0.605571	0.463929	0.598277	0.62667	0.99316	0.91719	0.995738	0.978758	0.0480407	0.274178	0.625012	0.279608	0.592056	0.243923	0.204568	0.72395	0.884741	0.675349	0.654021	-0.0968643	0.189637	0.598142	0.286246	0.194354	0.270834	0.292545	0.867306	0.705579	0.815631	0.86051	0.266065	1.34013e-16	3.77299e-15	2.16037e-10	1.29919e-06	1.07241e-12	1.48169e-13	1.29033e-08	3.31482e-05	6.26286e-11	8.65309e-12	0.0153137	0.701026	0.899859
805	2975	RDN25-1	-0.00120674	0.990064	0.997128	0.795596	0.785387	0.942292	0.796913	0.995385	0.981722	0.997721	0.98932	-0.0212235	0.629195	0.87266	0.382357	0.41855	0.582528	0.347387	0.802582	0.792283	0.898934	0.785242	0.0560178	0.448837	0.800037	0.710529	0.748015	0.528389	0.692933	0.968644	0.93968	0.900013	0.932074	-0.000470013	0.988555	0.997335	0.555652	0.58928	0.866781	0.511952	0.803628	0.801443	0.954694	0.739236	0.0282249	0.479108	0.795455
807	817	RDN25-1	0.0884315	0.360506	0.824085	0.513287	0.629394	0.909304	0.800401	0.99193	0.94725	0.997721	0.98932	0.00360028	0.934725	0.986104	0.752185	0.0247956	0.140964	0.2279	0.941754	0.224928	0.558838	0.677514	0.100114	0.175136	0.583906	0.328067	0.641257	0.767194	0.633424	0.868392	0.909698	0.96542	0.929523	0.230212	1.06324e-12	1.56512e-11	1.56823e-06	0.0783792	7.34065e-05	1.0062e-05	2.36255e-05	0.241478	0.000568375	8.9942e-05	0.139911	0.000423618	0.0102603
807	867	RDN25-1	-0.027555	0.776089	0.954043	0.736822	0.466791	0.848446	0.681031	0.995385	0.918037	0.997721	0.981654	0.0067436	0.878075	0.968118	0.989763	0.468046	0.766929	0.877975	0.994141	0.818796	0.952852	0.970686	-0.06176	0.403644	0.784889	0.396259	0.192512	0.496561	0.333346	0.899282	0.705579	0.895638	0.882627	0.0975485	0.00284185	0.0125821	0.0422673	0.379229	0.00763464	0.0314248	0.163476	0.651382	0.0376432	0.115341	0.0510667	0.200167	0.568519
807	876	RDN25-1	0.172074	0.0735877	0.526386	0.144257	0.317885	0.0987565	0.12648	0.843958	0.891056	0.896011	0.843623	-0.0133402	0.761521	0.922902	0.514166	0.195405	0.710928	0.521535	0.867048	0.595737	0.935563	0.865914	-0.12925	0.0795275	0.394275	0.0631514	0.0238795	0.0877104	0.0597461	0.647478	0.386307	0.700617	0.62342	0.202675	4.08545e-10	4.29951e-09	3.67186e-05	0.00859675	4.46528e-07	1.41043e-06	0.000375473	0.046582	5.75233e-06	1.54443e-05	0.0657263	0.0990379	0.399232
807	898	RDN25-1	-0.0050179	0.9587	0.99535	0.744376	0.900599	0.857733	0.907407	0.995385	0.997597	0.997721	0.995705	-0.0317143	0.470517	0.788784	0.259499	0.829025	0.366691	0.43324	0.70177	0.961991	0.787468	0.818088	-0.0709139	0.337456	0.73822	0.220862	0.544604	0.286549	0.322516	0.832214	0.88379	0.820226	0.864274	0.153593	2.40822e-06	1.50812e-05	0.00469578	0.00111237	0.000363474	0.00013861	0.0273626	0.0088854	0.00245555	0.00101467	-0.0185193	0.64242	0.869405
807	908	RDN25-1	-0.0658732	0.496158	0.890166	0.432225	0.840966	0.535881	0.337918	0.983998	0.991692	0.979865	0.949785	-0.0569083	0.195101	0.548077	0.176065	0.835521	0.276752	0.0717428	0.619055	0.963841	0.713743	0.40898	-0.0264707	0.720596	0.907493	0.6045	0.837295	0.764046	0.460432	0.952173	0.96232	0.96542	0.90041	0.154716	2.02769e-06	1.27954e-05	0.00164576	0.000165549	6.3922e-05	0.00136498	0.0109219	0.00183571	0.000502955	0.00822743	-0.0442466	0.267085	0.643523
807	960	RDN25-1	-0.0068621	0.943543	0.994477	0.907663	0.932221	0.682848	0.988979	0.995385	0.997597	0.997721	0.996323	0.00493928	0.910536	0.975384	0.657133	0.965993	0.548299	0.832649	0.917777	0.992096	0.883366	0.960892	-0.130805	0.075946	0.385534	0.167854	0.122395	0.0354319	0.10909	0.800581	0.628663	0.541366	0.727639	0.0655958	0.0450515	0.143243	0.0573383	0.233369	0.437634	0.0669632	0.203904	0.493241	0.695284	0.208259	0.00233266	0.953367	0.982405
807	966	RDN25-1	0.0987487	0.30698	0.805672	0.429171	0.193167	0.34076	0.384544	0.983974	0.863948	0.979865	0.963664	0.0337988	0.441837	0.771411	0.75102	0.217366	0.520257	0.635925	0.941192	0.620607	0.875201	0.901888	-0.108783	0.140493	0.528293	0.122956	0.435381	0.16083	0.128153	0.767217	0.841319	0.778329	0.74868	-0.0336267	0.304612	0.571734	0.257838	0.880835	0.372705	0.255482	0.551342	0.950994	0.635605	0.515732	-0.0415853	0.296953	0.667232
807	986	RDN25-1	0.0477599	0.621899	0.9221	0.498152	0.652717	0.790162	0.734721	0.99193	0.947996	0.997721	0.985471	-0.0606504	0.167283	0.500937	0.480197	0.0101514	0.102926	0.132434	0.848828	0.128879	0.487369	0.538486	-0.00603964	0.934971	0.979896	0.837911	0.237031	0.736266	0.805982	0.989652	0.741617	0.964961	0.958859	0.0370534	0.257939	0.513259	0.179148	0.264075	0.678396	0.540334	0.440037	0.531513	0.852332	0.765085	0.0961472	0.0156921	0.13107
807	990	RDN25-1	-0.0917464	0.342712	0.821103	0.414707	0.316892	0.264791	0.358236	0.978595	0.891056	0.951479	0.954535	-0.0414067	0.346014	0.69077	0.523015	0.345901	0.204011	0.382272	0.867048	0.748322	0.634485	0.793782	-0.0261163	0.724184	0.909441	0.815509	0.625344	0.543757	0.725121	0.989652	0.903483	0.908098	0.937343	0.0251554	0.442561	0.702503	0.469155	0.86614	0.93493	0.543239	0.750059	0.945272	0.977975	0.767834	0.0161977	0.684669	0.892128
807	1004	RDN25-1	-0.121665	0.207573	0.727387	0.390607	0.117819	0.208235	0.25164	0.975792	0.778651	0.935424	0.943026	0.0162173	0.712168	0.901223	0.361525	0.616797	0.842252	0.658359	0.791162	0.892005	0.963255	0.908904	-0.112399	0.127692	0.504339	0.327202	0.065409	0.13206	0.172592	0.868392	0.546739	0.736155	0.788236	-0.0207211	0.52707	0.769919	0.785016	0.203961	0.49611	0.695698	0.926784	0.453218	0.739942	0.866902	0.046779	0.24064	0.618342
807	1042	RDN25-1	-0.142452	0.139504	0.634355	0.125554	0.36644	0.202469	0.163337	0.816031	0.892843	0.931276	0.878	0.0672765	0.125477	0.435654	0.340444	0.0641865	0.1061	0.16159	0.777591	0.361125	0.491304	0.587356	0.0226576	0.759508	0.921007	0.93589	0.429687	0.65025	0.759033	0.996787	0.838286	0.94621	0.948148	-0.052091	0.111627	0.290671	0.12542	0.904892	0.326827	0.192102	0.34594	0.960055	0.590843	0.439759	-0.045754	0.251113	0.626765
807	1052	RDN25-1	0.0332029	0.731789	0.945193	0.769084	0.931664	0.759411	0.763197	0.995385	0.997597	0.997721	0.98932	-0.0252423	0.565751	0.840858	0.604143	0.267936	0.585837	0.57224	0.9069	0.675105	0.899084	0.880681	0.0531985	0.472028	0.815793	0.535448	0.901172	0.516608	0.519325	0.939985	0.984139	0.895638	0.905631	0.00402148	0.902315	0.96367	0.97532	0.469375	0.957929	0.969461	0.992312	0.722774	0.984142	0.990904	0.0424602	0.286897	0.657962
807	1056	RDN25-1	0.000158992	0.998691	0.999631	0.620255	0.680269	0.673477	0.990492	0.99316	0.948917	0.99705	0.996941	0.0685844	0.118278	0.422122	0.75291	0.0643727	0.609371	0.171166	0.942213	0.361125	0.899084	0.601412	0.0694564	0.347504	0.743874	0.827329	0.188558	0.739033	0.386207	0.989652	0.705579	0.964961	0.890455	0.0526573	0.107782	0.283122	0.982983	0.0677915	0.810894	0.186241	0.994282	0.217263	0.922923	0.431225	-0.0443639	0.265818	0.642148
807	1110	RDN25-1	0.120896	0.210485	0.732335	0.131331	0.157242	0.195146	0.301624	0.829658	0.814069	0.927386	0.943026	-0.0392859	0.371297	0.715654	0.945607	0.897409	0.568458	0.258312	0.983791	0.973737	0.890752	0.713155	-0.0521993	0.480402	0.819817	0.838807	0.810129	0.600967	0.383756	0.989652	0.955671	0.935075	0.890455	-0.020405	0.533392	0.774722	0.732347	0.835862	0.809954	0.34454	0.902724	0.933551	0.922923	0.611654	-0.0314126	0.430869	0.768256
807	1124	RDN25-1	-0.0932413	0.334872	0.821103	0.1707	0.387835	0.29909	0.371288	0.879609	0.902702	0.975159	0.958558	0.022269	0.612399	0.862811	0.617404	0.713764	0.845766	0.615007	0.91322	0.927107	0.963681	0.894926	-0.0501762	0.497599	0.827027	0.223667	0.563515	0.427478	0.544037	0.832848	0.88379	0.8675	0.91261	-0.048554	0.138137	0.337804	0.0281546	0.362243	0.123356	0.234981	0.119863	0.634077	0.324829	0.494419	-0.000154048	0.996919	0.998406
807	1133	RDN25-1	0.0373565	0.699755	0.938133	0.415819	0.842086	0.798373	0.719997	0.978595	0.991692	0.997721	0.982726	0.0421797	0.337077	0.683761	0.0959476	0.784651	0.535169	0.400781	0.48958	0.947639	0.879321	0.798187	-0.0602621	0.415164	0.790036	0.873748	0.16887	0.365463	0.436745	0.990637	0.693421	0.836691	0.90041	0.182778	1.8451e-08	1.51565e-07	1.83482e-07	0.0178396	1.22639e-05	2.1649e-06	3.92025e-06	0.0815103	0.000113885	2.30338e-05	0.0588442	0.13981	0.474617
807	1437	RDN25-1	-0.00164934	0.98642	0.997128	0.983787	0.806258	0.840052	0.960231	0.996965	0.986201	0.997721	0.995705	0.0561209	0.201362	0.552581	0.265165	0.608532	0.455616	0.200981	0.707881	0.888537	0.838129	0.648963	-0.00527122	0.94323	0.982591	0.985288	0.728058	0.759338	0.985241	0.996787	0.93409	0.964961	0.994704	0.118564	0.000281834	0.00143487	0.00578021	0.0762339	0.0116318	0.00119306	0.0326675	0.235697	0.0541035	0.00732894	0.0248604	0.533059	0.825186
807	1449	RDN25-1	-0.198477	0.0385558	0.409686	0.0157884	0.0348193	0.0230054	0.0460993	0.463233	0.614129	0.570359	0.727543	0.0158693	0.718079	0.904532	0.523277	0.855352	0.760036	0.777284	0.867048	0.96724	0.951221	0.944054	-0.0842754	0.254065	0.664748	0.0990703	0.198316	0.144109	0.272108	0.728992	0.709144	0.755785	0.856568	0.116454	0.00036194	0.00182857	0.13369	0.0905933	0.0304995	0.00305769	0.364458	0.267505	0.117792	0.0166029	0.0270096	0.498246	0.809391
807	1450	RDN25-1	-0.0858531	0.374735	0.834437	0.283364	0.317512	0.223105	0.369226	0.951059	0.891056	0.938113	0.956928	-0.00959066	0.827289	0.949227	0.512433	0.605362	0.33592	0.760997	0.867048	0.888537	0.765407	0.941388	-0.169325	0.021216	0.192522	0.0160471	0.0259835	0.00814546	0.0250474	0.514289	0.392978	0.373292	0.498671	0.103455	0.00154552	0.00713018	0.0791257	0.123778	0.099306	0.011242	0.254874	0.333981	0.282045	0.051741	0.0219972	0.581267	0.845146
807	1888	RDN25-1	-0.00600084	0.950619	0.99535	0.847334	0.821473	0.810346	0.914911	0.995385	0.986331	0.997721	0.995705	0.0119237	0.786193	0.934591	0.968524	0.915723	0.894852	0.886126	0.988228	0.97995	0.981909	0.972334	0.0118478	0.872833	0.960034	0.978519	0.939796	0.932848	0.92944	0.996787	0.992276	0.988746	0.978278	0.197011	1.2596e-09	1.20966e-08	3.0754e-05	0.000652533	5.05653e-06	5.32093e-07	0.000319452	0.00577393	5.13527e-05	6.36661e-06	0.0183923	0.644704	0.871065
807	2129	RDN25-1	0.0282813	0.770348	0.954043	0.776145	0.767207	0.724204	0.88125	0.995385	0.97722	0.997721	0.995705	-0.0363066	0.408692	0.750362	0.515304	0.593814	0.566834	0.104667	0.867048	0.884741	0.890723	0.489478	-0.0311446	0.673869	0.891616	0.714856	0.751554	0.767481	0.342827	0.968644	0.93968	0.96542	0.885001	-0.0109866	0.737378	0.896943	0.828144	0.891203	0.93518	0.160615	0.943373	0.955561	0.977975	0.391295	-0.0037151	0.925794	0.975949
807	2133	RDN25-1	0.0583333	0.546835	0.903104	0.354326	0.329493	0.298165	0.555217	0.965316	0.892077	0.975159	0.971444	0.0436784	0.320175	0.670567	0.128577	0.137825	0.0662825	0.356243	0.540947	0.513321	0.386341	0.787075	-0.00446864	0.951862	0.986917	0.68087	0.623441	0.583201	0.971706	0.960787	0.903483	0.927298	0.98787	-0.0177982	0.586956	0.814763	0.649211	0.582547	0.448468	0.678036	0.86168	0.798184	0.704046	0.855028	-0.0469883	0.23854	0.618342
807	2142	RDN25-1	-0.0828411	0.391783	0.842934	0.39329	0.50197	0.539353	0.508169	0.975984	0.924029	0.979865	0.968555	0.0655498	0.135497	0.451747	0.266491	0.21331	0.0847569	0.0984262	0.707881	0.616888	0.44039	0.481925	0.0888565	0.229066	0.640598	0.308105	0.250786	0.166734	0.18323	0.867306	0.746393	0.778705	0.788482	0.0627635	0.0551793	0.168297	0.200631	0.168017	0.0361471	0.0432601	0.472842	0.408171	0.134935	0.150579	-0.0104463	0.793403	0.935151
807	2191	RDN25-1	0.136519	0.156921	0.652395	0.0665381	0.250909	0.26611	0.145691	0.743145	0.891056	0.951479	0.856572	0.000710979	0.987096	0.999449	0.311945	0.837506	0.643897	0.815294	0.755601	0.96449	0.914661	0.954503	0.0195774	0.791393	0.930353	0.369594	0.94178	0.957814	0.699667	0.889191	0.993576	0.99444	0.932143	-0.0109691	0.737781	0.897103	0.33736	0.648707	0.381544	0.996121	0.642916	0.835277	0.642754	0.99802	0.0132492	0.73976	0.916625
807	2197	RDN25-1	-9.65651e-06	0.99992	0.99992	0.876825	0.943569	0.884217	0.868166	0.995385	0.997597	0.997721	0.995705	-0.0200146	0.648857	0.880146	0.942694	0.650979	0.918072	0.453068	0.983651	0.910954	0.985339	0.825564	0.0037695	0.959387	0.988087	0.80728	0.964354	0.813606	0.867564	0.989652	0.995694	0.966397	0.968526	0.03172	0.332868	0.600835	0.282215	0.650492	0.240232	0.702427	0.581239	0.836398	0.494773	0.870021	0.00764281	0.84805	0.952628
807	2220	RDN25-1	0.0472817	0.625396	0.923223	0.503325	0.840927	0.656425	0.465444	0.99193	0.991692	0.995892	0.9646	0.0213004	0.627954	0.872293	0.416832	0.94374	0.696787	0.326032	0.822148	0.989627	0.929998	0.770852	0.0943847	0.201276	0.61392	0.151765	0.425649	0.240901	0.122088	0.790216	0.835779	0.809322	0.747893	0.182242	2.03318e-08	1.65775e-07	3.45401e-06	0.00283811	4.3099e-06	5.29671e-08	4.58442e-05	0.0189785	4.47684e-05	7.95415e-07	0.0256127	0.520735	0.819341
807	2256	RDN25-1	-0.0486536	0.615387	0.918895	0.583954	0.657034	0.452855	0.647159	0.99316	0.948207	0.979865	0.981654	-0.0242102	0.58175	0.847738	0.545168	0.700405	0.295151	0.652777	0.884225	0.920793	0.729159	0.908904	0.00944004	0.89852	0.965545	0.989189	0.906958	0.814582	0.883598	0.996787	0.984912	0.966902	0.970571	0.0966267	0.00311644	0.0137424	0.0466163	0.0663332	0.0824678	0.0107898	0.177547	0.214157	0.24932	0.0500101	-0.000689607	0.986207	0.994966
807	2258	RDN25-1	-0.051004	0.598401	0.911296	0.640538	0.448248	0.651963	0.622061	0.99316	0.912316	0.995892	0.978758	0.0221441	0.614395	0.863785	0.647871	0.885705	0.58664	0.640114	0.917777	0.973148	0.899084	0.90393	0.116002	0.115854	0.485838	0.145207	0.323389	0.124679	0.135845	0.786815	0.783286	0.734505	0.752226	0.100467	0.00211156	0.00952804	0.0204248	0.188766	0.00770483	0.00885487	0.0938844	0.436306	0.0378473	0.0425423	0.0309263	0.438042	0.772413
807	2260	RDN25-1	-0.0442647	0.647647	0.929331	0.870119	0.513454	0.368683	0.696058	0.995385	0.928518	0.979865	0.981654	0.0872748	0.0466815	0.24603	0.00567094	0.317284	0.423085	0.0614313	0.106572	0.731086	0.82178	0.386224	-0.0565155	0.444811	0.798779	0.953667	0.338662	0.188228	0.50828	0.996787	0.794646	0.790649	0.903493	-0.0295042	0.367759	0.634905	0.474998	0.293343	0.0522288	0.519766	0.756543	0.564657	0.176878	0.745602	0.0263472	0.508846	0.813545
807	2264	RDN25-1	-0.0511389	0.597433	0.911096	0.449543	0.711772	0.501768	0.421106	0.983998	0.961719	0.979865	0.9646	-0.0129872	0.767647	0.927257	0.451022	0.977181	0.541798	0.374054	0.837065	0.995977	0.879805	0.792282	0.0373583	0.613657	0.874681	0.904326	0.574863	0.801086	0.932812	0.993093	0.887706	0.965422	0.978278	-0.0616957	0.0594596	0.177249	0.0448163	0.341837	0.0459796	0.0172119	0.171921	0.615287	0.16263	0.0731923	-0.0112386	0.778127	0.932745
807	2266	RDN25-1	-0.03287	0.734377	0.945193	0.584534	0.630113	0.516842	0.836865	0.99316	0.94725	0.979865	0.994181	0.0506643	0.248793	0.605262	0.620317	0.6061	0.727691	0.20303	0.91474	0.888537	0.942998	0.651676	0.0038277	0.95876	0.988087	0.804352	0.8594	0.709156	0.841465	0.989652	0.974315	0.964131	0.966529	0.0114665	0.726359	0.891081	0.777376	0.884639	0.581582	0.54715	0.924729	0.95202	0.80273	0.768947	0.0191783	0.630629	0.860947
807	2278	RDN25-1	-0.129541	0.179426	0.684585	0.194815	0.22768	0.259867	0.22551	0.905288	0.891056	0.947071	0.931423	0.0448921	0.3069	0.656606	0.455042	0.463961	0.228274	0.292585	0.838646	0.816361	0.658904	0.736917	-0.0706125	0.339518	0.739182	0.355417	0.413497	0.482556	0.416993	0.878741	0.834248	0.893558	0.90041	0.0125404	0.701901	0.879365	0.860797	0.815655	0.485166	0.617525	0.955866	0.923144	0.732347	0.81756	0.000146472	0.99707	0.998406
807	2280	RDN25-1	-0.0497968	0.607099	0.915885	0.967246	0.279582	0.580838	0.685834	0.996965	0.891056	0.995325	0.981654	0.0594073	0.176174	0.515837	0.0347348	0.90133	0.288788	0.166117	0.319171	0.976525	0.724391	0.593954	0.00978281	0.894856	0.965545	0.433926	0.508729	0.96763	0.814862	0.912525	0.876683	0.99555	0.963226	0.140931	1.53999e-05	8.91516e-05	1.07379e-05	0.15934	0.000652957	0.000106296	0.000128269	0.394606	0.00419553	0.000795858	0.0669573	0.0928601	0.387191
807	2281	RDN25-1	-0.0853867	0.377345	0.835902	0.457282	0.227365	0.439866	0.436371	0.987606	0.891056	0.979865	0.9646	0.0241004	0.583465	0.848161	0.548318	0.733608	0.537025	0.536052	0.884225	0.930859	0.879571	0.867538	-0.0141744	0.848137	0.949519	0.94156	0.495399	0.924564	0.920652	0.996787	0.870261	0.988048	0.977711	0.197658	1.10941e-09	1.08118e-08	2.83622e-06	0.00347074	1.84603e-07	1.03495e-07	3.92294e-05	0.0222466	2.63661e-06	1.47818e-06	0.0448829	0.260259	0.635927
807	2288	RDN25-1	0.0879968	0.362881	0.825505	0.503405	0.269112	0.658626	0.433437	0.99193	0.891056	0.995892	0.9646	-0.0124223	0.777482	0.931282	0.564871	0.758146	0.265692	0.671231	0.886189	0.937368	0.69933	0.913041	-0.00825261	0.911229	0.970146	0.742789	0.790759	0.516444	0.831851	0.978407	0.951082	0.895638	0.96523	0.189081	5.76439e-09	5.04997e-08	0.000103677	2.8188e-05	0.00018705	2.4754e-06	0.000936302	0.000440941	0.00134676	2.61259e-05	-0.031239	0.433422	0.769502
807	2314	RDN25-1	-0.0304457	0.753315	0.948897	0.448935	0.508351	0.830448	0.819445	0.983998	0.925006	0.997721	0.994181	-0.0978966	0.0255899	0.163359	0.00642804	0.0227435	0.0723088	0.0643376	0.116503	0.213464	0.403456	0.394508	-0.111687	0.130141	0.50732	0.0492869	0.0771226	0.190551	0.182388	0.64174	0.564716	0.790649	0.788482	-0.0134661	0.681066	0.87182	0.164726	0.305156	0.902007	0.872032	0.41826	0.5757	0.964588	0.947522	0.041027	0.303491	0.674875
807	2337	RDN25-1	0.0561525	0.56195	0.903857	0.673469	0.591274	0.858293	0.778069	0.99316	0.941893	0.997721	0.98932	-0.0147271	0.737596	0.913056	0.614991	0.833084	0.290674	0.390537	0.912084	0.962772	0.724391	0.797288	-0.0292526	0.692646	0.897873	0.61052	0.751742	0.395517	0.470683	0.952173	0.93968	0.85297	0.90041	0.219939	1.07541e-11	1.37302e-10	2.08766e-06	2.23191e-05	2.9222e-06	4.44483e-07	3.03115e-05	0.000364314	3.18204e-05	5.50991e-06	-0.00184281	0.963151	0.985068
807	2340	RDN25-1	-0.0602836	0.533488	0.901809	0.68564	0.248958	0.623953	0.57557	0.995083	0.891056	0.995892	0.978758	0.0156687	0.721494	0.906326	0.528907	0.426562	0.602969	0.69911	0.869122	0.796419	0.899084	0.919471	-0.0345496	0.640585	0.880814	0.841229	0.254097	0.758845	0.691606	0.989652	0.749458	0.964961	0.932074	0.0585866	0.0735134	0.207456	0.0843135	0.915686	0.0824975	0.110403	0.265679	0.967212	0.24932	0.302228	0.0641939	0.10718	0.416336
807	2347	RDN25-1	0.00555701	0.954268	0.99535	0.866871	0.610652	0.995067	0.999783	0.995385	0.941893	0.999984	0.999821	0.0359894	0.412801	0.751207	0.80918	0.687475	0.533178	0.536327	0.958326	0.920285	0.878775	0.867538	0.0347404	0.638741	0.879605	0.885675	0.765543	0.706197	0.710908	0.993093	0.944529	0.964131	0.934133	0.100247	0.00215995	0.00973309	0.0814778	0.452005	0.0159583	0.0144395	0.260808	0.709176	0.0695496	0.063245	0.0605268	0.128814	0.452439
807	2349	RDN25-1	-0.0415915	0.667626	0.93613	0.304661	0.598899	0.639952	0.521085	0.952625	0.941893	0.995892	0.968555	0.0895819	0.0411543	0.2237	0.64821	0.222576	0.0934968	0.179086	0.917777	0.624926	0.46273	0.614826	0.177024	0.0159289	0.162642	0.16406	0.0589905	0.0290364	0.0486348	0.794667	0.53998	0.495547	0.596958	0.109579	0.000795095	0.00382901	0.31495	0.0746501	0.00889252	0.0262868	0.620456	0.232441	0.0427231	0.100607	0.0152478	0.702252	0.899859
807	2351	RDN25-1	-0.0199428	0.836925	0.964374	0.731951	0.874529	0.682186	0.962264	0.995385	0.997597	0.997721	0.995705	0.087307	0.0466003	0.245996	0.181965	0.0416448	0.188123	0.0369062	0.623716	0.2942	0.616975	0.304043	0.173771	0.0180036	0.174938	0.0503151	0.0141842	0.0521418	0.0154003	0.64174	0.314501	0.599066	0.430588	0.0399296	0.222785	0.464741	0.586362	0.147692	0.649081	0.156131	0.824339	0.37683	0.84346	0.384188	-0.0370001	0.353456	0.719793
807	2416	RDN25-1	-0.0560368	0.562757	0.903857	0.492104	0.57999	0.601726	0.979644	0.99193	0.941893	0.995892	0.995836	-0.0130762	0.766101	0.926749	0.596045	0.783367	0.836355	0.411271	0.902308	0.947039	0.963255	0.80478	0.0826771	0.263215	0.675257	0.408977	0.361231	0.279115	0.0831538	0.900743	0.811007	0.818652	0.689185	0.0661705	0.0431998	0.139101	0.253658	0.239495	0.081976	0.0020437	0.545287	0.501508	0.24932	0.0117524	0.00373267	0.925444	0.975949
807	2417	RDN25-1	-0.0678021	0.483602	0.884788	0.625326	0.603209	0.673448	0.607193	0.99316	0.941893	0.99705	0.978758	0.00244953	0.955562	0.990753	0.716928	0.81684	0.584081	0.714354	0.935933	0.9579	0.899084	0.921926	0.0428207	0.562763	0.855417	0.463207	0.529036	0.392234	0.458037	0.912592	0.883318	0.851552	0.90041	0.156075	1.64411e-06	1.05775e-05	8.95688e-05	0.00147188	4.42454e-06	8.49109e-06	0.000834885	0.0112773	4.57784e-05	7.77512e-05	-0.0117108	0.769064	0.927663
807	2421	RDN25-1	-0.0807534	0.403867	0.847349	0.493685	0.484247	0.437258	0.444704	0.99193	0.920475	0.979865	0.9646	-0.0302436	0.491353	0.796958	0.701799	0.683276	0.565176	0.581007	0.933364	0.920051	0.888858	0.885151	0.0279895	0.705288	0.902985	0.644745	0.700788	0.708689	0.692731	0.953659	0.925325	0.964131	0.932074	0.234711	3.72451e-13	5.98465e-12	2.29248e-08	4.25543e-06	1.32217e-09	4.42597e-10	6.40918e-07	9.24238e-05	3.50977e-08	1.08705e-08	-0.00530755	0.894145	0.96522
807	2619	RDN25-1	-0.158824	0.0990364	0.568876	0.149459	0.0925421	0.0291804	0.0607066	0.849015	0.751079	0.618437	0.785896	-0.0782078	0.0747736	0.324511	0.204296	0.101777	0.00469446	0.0264514	0.650012	0.449527	0.0862731	0.249614	-0.0488743	0.508835	0.836379	0.634357	0.415388	0.158606	0.311016	0.953659	0.834248	0.778329	0.864274	0.0815575	0.0126551	0.0489848	0.0391994	0.258584	0.630407	0.189807	0.154911	0.527201	0.830015	0.436407	0.0216734	0.586845	0.846992
807	2634	RDN25-1	0.0951859	0.324845	0.816406	0.711431	0.876134	0.285952	0.356682	0.995385	0.997597	0.96429	0.954535	-0.0402757	0.359358	0.702568	0.070657	0.0517701	0.591561	0.394208	0.429572	0.328473	0.899084	0.798163	-0.0518141	0.483651	0.820902	0.182686	0.132198	0.628152	0.496829	0.807776	0.634725	0.942067	0.901827	-0.0583653	0.0746094	0.208982	0.00955819	0.00993879	0.25805	0.122065	0.0498391	0.052343	0.516492	0.325929	0.078462	0.0488299	0.26325
807	2640	RDN25-1	-0.031401	0.745834	0.945193	0.88538	0.628466	0.662998	0.612513	0.995385	0.94725	0.995892	0.978758	-0.0374689	0.393844	0.734771	0.868074	0.339586	0.310363	0.241222	0.97313	0.743074	0.746276	0.6951	-0.0802288	0.277663	0.690801	0.677329	0.242479	0.237303	0.201309	0.960787	0.741827	0.808587	0.813086	0.23039	1.02049e-12	1.51419e-11	2.76267e-10	5.82992e-05	2.40661e-08	3.36153e-08	1.57832e-08	0.000789744	4.39207e-07	5.38664e-07	0.0208989	0.600286	0.849855
807	2724	RDN25-1	-0.0902826	0.3505	0.821103	0.546122	0.286707	0.372741	0.334068	0.99193	0.891056	0.979865	0.947325	-0.0363443	0.408206	0.750362	0.871753	0.318353	0.45946	0.368969	0.973886	0.731086	0.841436	0.789852	0.0100465	0.89204	0.964985	0.644116	0.86621	0.904301	0.977585	0.953659	0.974316	0.985113	0.991163	0.184199	1.42451e-08	1.18793e-07	1.53776e-06	0.00235746	2.86153e-06	4.3087e-06	2.33598e-05	0.0163467	3.13338e-05	4.27293e-05	0.0246439	0.536632	0.826094
807	2729	RDN25-1	-0.0423181	0.662172	0.934932	0.854027	0.939034	0.578594	0.497636	0.995385	0.997597	0.995325	0.968555	0.0494846	0.259997	0.616094	0.176527	0.10146	0.48128	0.642955	0.619055	0.449527	0.85402	0.90393	-0.0187775	0.799733	0.931331	0.956982	0.713415	0.674971	0.563172	0.996787	0.928957	0.955724	0.916251	0.203694	3.32446e-10	3.57868e-09	2.46433e-07	1.3132e-06	1.2886e-06	3.63401e-06	4.86937e-06	3.31836e-05	1.50508e-05	3.75992e-05	-0.0505689	0.204594	0.574781
807	2735	RDN25-1	-0.0573675	0.553504	0.903104	0.458852	0.578696	0.545782	0.637341	0.987606	0.941893	0.983595	0.981654	-0.052171	0.23498	0.593123	0.181247	0.369916	0.257246	0.384357	0.623716	0.768982	0.69125	0.794721	0.101921	0.16744	0.572738	0.311937	0.25014	0.215574	0.15581	0.867306	0.74622	0.79846	0.772356	0.0110117	0.736802	0.896574	0.845196	0.87431	0.865426	0.598727	0.952068	0.949066	0.953601	0.803602	0.00260225	0.947984	0.981352
807	2791	RDN25-1	-0.0229255	0.812951	0.957799	0.922977	0.294477	0.758125	0.868942	0.995385	0.891056	0.997721	0.995705	0.0345611	0.431603	0.765177	0.377916	0.361138	0.601531	0.408022	0.799005	0.764736	0.899084	0.803218	-0.117129	0.112332	0.481507	0.199321	0.0163619	0.11074	0.1564	0.813378	0.329145	0.729436	0.772356	0.165024	3.94882e-07	2.69863e-06	5.59341e-05	0.152108	6.86914e-05	8.74231e-06	0.000550543	0.383996	0.000537265	7.97735e-05	0.0901629	0.0235133	0.16562
807	2793	RDN25-1	-0.000973809	0.991982	0.997128	0.77431	0.589614	0.99245	0.858842	0.995385	0.941893	0.999984	0.995705	0.0380064	0.38709	0.728197	0.865108	0.752061	0.422942	0.24568	0.97313	0.93594	0.82178	0.697996	-0.051746	0.484227	0.820902	0.323156	0.207978	0.528687	0.677707	0.868392	0.711676	0.900013	0.929858	0.136341	2.90572e-05	0.000165025	0.0149935	0.133088	0.000456355	5.72102e-05	0.073376	0.352221	0.0030362	0.000447465	0.0572778	0.150682	0.491648
807	2815	RDN25-1	-0.168748	0.0794179	0.534704	0.149847	0.0307364	0.0368813	0.150558	0.849015	0.585328	0.676006	0.865191	0.0133838	0.760765	0.922835	0.529807	0.415283	0.554758	0.447428	0.869122	0.790408	0.887613	0.824929	-0.19244	0.00868274	0.116264	0.0326494	0.00290667	0.00266339	0.0299113	0.578173	0.167294	0.330002	0.520575	0.234557	3.86233e-13	6.11659e-12	5.66358e-09	0.00094305	7.74047e-07	1.27186e-11	2.14661e-07	0.00789279	9.56844e-06	4.64229e-10	0.0631077	0.113266	0.428848
807	2826	RDN25-1	-0.0873858	0.366236	0.827359	0.39187	0.402234	0.339639	0.390728	0.975984	0.903623	0.979865	0.963664	0.0804035	0.0669458	0.305439	0.141862	0.204199	0.1567	0.100553	0.566976	0.609645	0.574875	0.48487	-0.103272	0.161853	0.56657	0.197667	0.218772	0.151161	0.188759	0.81167	0.717715	0.765569	0.794967	-0.00928996	0.776763	0.914338	0.807583	0.817935	0.628008	0.81508	0.933725	0.924928	0.828283	0.922463	0.00294833	0.941078	0.97789
807	2843	RDN25-1	-0.167383	0.0819149	0.537112	0.0720405	0.179433	0.0548653	0.216529	0.743145	0.846136	0.792231	0.925536	-0.00679057	0.877233	0.968117	0.640276	0.780425	0.495889	0.460108	0.917777	0.947039	0.862048	0.830852	0.0230891	0.755072	0.919574	0.953679	0.588204	0.958889	0.400106	0.996787	0.887706	0.99444	0.898865	0.0180817	0.581013	0.811299	0.995229	0.430426	0.818901	0.114993	0.999105	0.688471	0.928818	0.311947	-0.0238301	0.550172	0.82687
807	2865	RDN25-1	0.0737894	0.445736	0.868663	0.537013	0.647567	0.700725	0.631952	0.99193	0.947996	0.997721	0.981654	0.0502366	0.252816	0.609646	0.449988	0.673312	0.754132	0.609454	0.83692	0.919737	0.949519	0.892144	0.0232437	0.753484	0.919251	0.86763	0.98846	0.885339	0.980736	0.990136	0.997669	0.981238	0.992443	-0.0241613	0.460804	0.714974	0.447729	0.359973	0.13836	0.204161	0.733206	0.633444	0.351655	0.454873	0.0244967	0.539069	0.826801
807	2870	RDN25-1	0.0556784	0.565262	0.904985	0.457078	0.939532	0.670675	0.682313	0.987606	0.997597	0.995892	0.981654	0.0186608	0.671169	0.883521	0.453036	0.636768	0.898393	0.925376	0.838646	0.902627	0.983028	0.986443	0.038708	0.600895	0.870314	0.459261	0.919058	0.738341	0.753908	0.912525	0.9892	0.964961	0.947523	-0.0285451	0.383542	0.648889	0.877773	0.152379	0.303462	0.272592	0.959562	0.38431	0.56802	0.537011	0.0474992	0.233468	0.615692
807	2880	RDN25-1	-0.0838242	0.386168	0.842701	0.652031	0.103387	0.197986	0.286662	0.99316	0.757754	0.928383	0.943026	0.019075	0.664311	0.882709	0.296701	0.232647	0.568846	0.912586	0.737581	0.642458	0.890752	0.983303	0.075914	0.304408	0.711447	0.165955	0.853607	0.718081	0.512195	0.798773	0.971827	0.964961	0.905212	-0.0306567	0.349336	0.616013	0.885769	0.0209828	0.048952	0.155638	0.962428	0.091933	0.169569	0.383693	0.0917937	0.0211033	0.156564
807	2921	RDN25-1	-0.0347417	0.719864	0.942096	0.942447	0.550072	0.900612	0.801143	0.995608	0.935373	0.997721	0.98932	0.0449606	0.306161	0.656146	0.104787	0.804499	0.179226	0.271462	0.504892	0.951828	0.606965	0.721896	-0.0736938	0.31881	0.723958	0.699191	0.231586	0.512454	0.410877	0.966226	0.732908	0.895638	0.90041	-0.000856145	0.979154	0.993939	0.352267	0.563468	0.594323	0.831747	0.661256	0.789336	0.807174	0.930943	0.029848	0.454187	0.780435
807	2922	RDN25-1	-0.0347417	0.719864	0.942096	0.655942	0.547875	0.643289	0.807502	0.99316	0.934339	0.995892	0.991006	0.0542547	0.216782	0.574019	0.427696	0.693514	0.402508	0.191514	0.827067	0.920567	0.809327	0.640616	0.023082	0.755145	0.919574	0.888512	0.934464	0.894134	0.674709	0.993093	0.991885	0.984067	0.929858	0.000117818	0.997131	0.998428	0.795832	0.57134	0.754016	0.795565	0.930359	0.794435	0.894962	0.918384	0.0302039	0.448821	0.775796
807	2923	RDN25-1	0.0427676	0.658806	0.932919	0.806475	0.732565	0.679704	0.540074	0.995385	0.964757	0.997721	0.969138	0.0241799	0.582224	0.847738	0.897927	0.764282	0.6365	0.373455	0.979022	0.940284	0.911565	0.792123	-0.0410823	0.57874	0.859499	0.474588	0.587979	0.598026	0.784646	0.922066	0.887706	0.933312	0.956002	-0.00192641	0.953115	0.985115	0.666153	0.883697	0.948966	0.649079	0.869673	0.951785	0.981693	0.833185	0.00585065	0.883387	0.962316
807	2944	RDN25-1	-0.0152384	0.875033	0.977734	0.614081	0.779828	0.914371	0.943298	0.99316	0.980795	0.997721	0.995705	-0.00912145	0.835616	0.953748	0.388498	0.552273	0.731655	0.981756	0.805643	0.868047	0.942998	0.997404	-0.0679887	0.357812	0.752158	0.196944	0.793993	0.596716	0.445101	0.809968	0.951883	0.933312	0.90041	-0.0149615	0.647916	0.853695	0.240749	0.566196	0.776627	0.857653	0.530057	0.79189	0.905277	0.945829	-0.0454298	0.25449	0.629503
807	2946	RDN25-1	-0.052582	0.587117	0.910291	0.705764	0.481084	0.617637	0.593627	0.995385	0.920382	0.995892	0.978758	0.0280364	0.523528	0.814094	0.442031	0.941277	0.551846	0.592375	0.832851	0.989453	0.88592	0.891498	0.0241962	0.743727	0.917028	0.645933	0.993914	0.744079	0.775007	0.953659	0.997698	0.964961	0.952628	0.17085	1.49565e-07	1.10216e-06	2.99071e-05	0.00506821	1.14498e-05	1.08828e-05	0.000313131	0.0303199	0.000107082	9.62961e-05	0.0235355	0.555113	0.831534
807	2948	RDN25-1	-0.0647587	0.50349	0.893586	0.515973	0.263128	0.598027	0.43379	0.99193	0.891056	0.995738	0.9646	0.0143513	0.744054	0.915724	0.829868	0.494421	0.611428	0.991821	0.964052	0.834524	0.899084	0.998448	0.00124603	0.98657	0.995149	0.984889	0.526584	0.877154	0.862699	0.996787	0.883318	0.979029	0.966529	0.185859	1.05013e-08	8.89235e-08	3.17434e-05	0.0130918	5.33092e-07	8.21945e-06	0.000327144	0.0644295	6.76794e-06	7.5792e-05	0.0560705	0.15949	0.500343
807	2959	RDN25-1	0.0236096	0.807476	0.957799	0.714062	0.654381	0.74009	0.982284	0.995385	0.947996	0.997721	0.995836	0.0168169	0.702024	0.898219	0.559947	0.496213	0.586942	0.853932	0.8857	0.834843	0.899084	0.963188	0.118462	0.108276	0.472137	0.101921	0.0970774	0.102255	0.236601	0.733786	0.587832	0.718843	0.839759	0.160304	8.46079e-07	5.58514e-06	7.55201e-05	0.000452035	1.47468e-05	0.000470004	0.000726985	0.00422758	0.000134565	0.00313495	-0.0247803	0.534379	0.825244
807	2975	RDN25-1	-0.0307163	0.751194	0.948059	0.528489	0.842674	0.666525	0.694128	0.99193	0.991692	0.995892	0.981654	0.0454933	0.300461	0.651344	0.843608	0.370153	0.518173	0.461757	0.968624	0.768982	0.873483	0.831118	0.0224053	0.762106	0.921451	0.878315	0.714746	0.908332	0.867914	0.992618	0.928957	0.985113	0.968526	-0.00430382	0.895494	0.961459	0.37846	0.925595	0.657455	0.725734	0.680648	0.970656	0.847873	0.881427	-0.00926855	0.816253	0.942607
817	867	RDN25-1	-0.116326	0.22837	0.750901	0.29695	0.283942	0.478621	0.220939	0.952625	0.891056	0.979865	0.930495	0.00439515	0.920357	0.980801	0.814272	0.929508	0.327192	0.944967	0.960892	0.987197	0.761613	0.992555	-0.061018	0.409327	0.788327	0.517491	0.48819	0.833604	0.381427	0.938985	0.865373	0.967816	0.890455	0.148301	5.32904e-06	3.2628e-05	0.000399255	0.00466558	1.03905e-06	0.000266005	0.00306796	0.0285108	1.24686e-05	0.00186416	-0.00101357	0.979728	0.992215
817	876	RDN25-1	0.063334	0.512944	0.897276	0.645477	0.722084	0.865951	0.571723	0.99316	0.96306	0.997721	0.978758	0.0332566	0.449199	0.776318	0.741345	0.89199	0.795831	0.577019	0.938679	0.973332	0.958216	0.88112	-0.046872	0.526371	0.844368	0.444643	0.406962	0.239469	0.502794	0.912525	0.834248	0.808899	0.901827	0.205921	2.1114e-10	2.31832e-09	1.40226e-05	0.000540474	4.13791e-05	1.70439e-07	0.000157485	0.00491476	0.000336669	2.29699e-06	0.0249615	0.531393	0.825186
817	898	RDN25-1	-0.131139	0.174074	0.673796	0.185264	0.22865	0.102113	0.0969036	0.893537	0.891056	0.90051	0.790816	0.0234573	0.593553	0.855277	0.746204	0.680072	0.815403	0.780857	0.939954	0.920051	0.958216	0.944824	0.0423609	0.566968	0.856695	0.656335	0.610584	0.926686	0.946927	0.955594	0.897436	0.988048	0.981274	0.212895	4.92547e-11	5.71285e-10	2.36035e-06	4.13862e-05	5.06101e-06	4.01769e-06	3.35297e-05	0.000604239	5.13527e-05	4.0454e-05	-0.0017507	0.964992	0.985944
817	908	RDN25-1	-0.103944	0.282101	0.7975	0.449327	0.292286	0.144819	0.27139	0.983998	0.891056	0.912294	0.943026	0.00664987	0.879757	0.968372	0.549617	0.962394	0.446231	0.983281	0.884225	0.991533	0.829386	0.997708	0.0618992	0.402583	0.783752	0.283831	0.54511	0.826554	0.490245	0.867306	0.88379	0.967816	0.90041	0.405292	3.10361e-38	6.38957e-36	1.45211e-24	2.61268e-15	2.80953e-22	1.54459e-27	6.36025e-22	6.86612e-13	7.38344e-20	5.07398e-25	0.00953243	0.811119	0.942607
817	960	RDN25-1	0.0635387	0.51158	0.897276	0.799091	0.714918	0.932159	0.652415	0.995385	0.961719	0.997721	0.981654	0.0312202	0.477462	0.791692	0.912829	0.907626	0.634688	0.784194	0.980658	0.977227	0.910637	0.944824	-0.0448508	0.544377	0.848849	0.315288	0.425859	0.207184	0.426084	0.867306	0.835779	0.795318	0.90041	0.0619719	0.0583269	0.174822	0.575518	0.475738	0.857568	0.254078	0.819762	0.728578	0.948123	0.514817	0.0241313	0.545142	0.82687
817	966	RDN25-1	0.229043	0.0165911	0.286911	0.0538228	0.0462218	0.0153799	0.0651336	0.721665	0.646813	0.505231	0.788575	0.00719037	0.870067	0.966607	0.639611	0.863839	0.665213	0.437728	0.917777	0.967482	0.919215	0.821092	-0.0393508	0.59486	0.870092	0.379572	0.510417	0.752239	0.281615	0.889191	0.879015	0.964961	0.856568	-0.0460861	0.159333	0.371177	0.0778945	0.230162	0.424125	0.0184908	0.252976	0.488978	0.682965	0.0767673	0.0176737	0.657685	0.878442
817	986	RDN25-1	-0.0936382	0.332809	0.821103	0.351237	0.201433	0.267392	0.316465	0.962515	0.87067	0.954763	0.943026	-0.010087	0.818502	0.947375	0.805498	0.374629	0.554446	0.71165	0.958326	0.77164	0.887613	0.921743	-0.0534053	0.470305	0.815793	0.488105	0.259878	0.357231	0.434152	0.924568	0.753944	0.836691	0.90041	0.0951343	0.00361257	0.015699	0.0382518	0.335265	0.0554482	0.0245409	0.151852	0.609319	0.185628	0.0955459	0.0441668	0.267949	0.643523
817	990	RDN25-1	0.0262973	0.786057	0.954043	0.70638	0.499566	0.647861	0.907368	0.995385	0.922384	0.995892	0.995705	0.0410199	0.350542	0.694014	0.315774	0.340701	0.218279	0.588861	0.758551	0.743656	0.653274	0.890349	-0.143068	0.052046	0.319254	0.10831	0.00498905	0.11799	0.0440012	0.749052	0.201711	0.731315	0.580699	0.0045118	0.890475	0.960771	0.695322	0.0746089	0.530974	0.797943	0.883327	0.232441	0.765862	0.918384	0.0989716	0.012871	0.117444
817	1004	RDN25-1	0.0130189	0.893118	0.980643	0.502711	0.699558	0.626404	0.493408	0.99193	0.955717	0.995892	0.968555	0.0288769	0.51115	0.805612	0.111332	0.346255	0.188421	0.0818132	0.516756	0.748322	0.616975	0.437892	-0.086338	0.242586	0.65517	0.715351	0.50447	0.528775	0.704679	0.968644	0.873927	0.900013	0.932143	-0.0505017	0.122996	0.312132	0.88873	0.681183	0.727489	0.873566	0.96275	0.848124	0.878172	0.947522	-0.0286942	0.471827	0.790538
817	1042	RDN25-1	0.0315985	0.744291	0.945193	0.856925	0.794795	0.898139	0.595429	0.995385	0.984347	0.997721	0.978758	0.121418	0.00556529	0.0520797	0.182999	0.0525466	0.0379856	0.003314	0.624572	0.329139	0.299561	0.0731865	0.036862	0.61838	0.875843	0.868646	0.700073	0.816637	0.450849	0.990136	0.925325	0.967635	0.90041	0.0159427	0.626534	0.840653	0.439242	0.814796	0.948039	0.322704	0.727378	0.923144	0.981693	0.59649	0.00349061	0.930266	0.975949
817	1052	RDN25-1	0.124644	0.196577	0.716797	0.31502	0.207548	0.276034	0.207332	0.952625	0.881325	0.964148	0.914411	0.0424062	0.334486	0.683074	0.68581	0.382526	0.568815	0.354599	0.924977	0.77648	0.890752	0.787075	0.0350116	0.636123	0.879381	0.860426	0.595718	0.790588	0.62801	0.989652	0.890021	0.965422	0.929523	-0.0420987	0.198638	0.430469	0.15847	0.557753	0.157297	0.315076	0.408694	0.784677	0.38272	0.587665	-0.0109591	0.783506	0.934567
817	1056	RDN25-1	-0.0248162	0.797842	0.957799	0.873767	0.628496	0.579594	0.83078	0.995385	0.94725	0.995325	0.994181	0.0488342	0.266321	0.621731	0.288098	0.726506	0.731717	0.291114	0.730745	0.929532	0.942998	0.736054	0.150332	0.0411019	0.279806	0.0504177	0.152547	0.130328	0.0495736	0.64174	0.668155	0.734985	0.596958	0.0708008	0.0304957	0.103881	0.0752922	0.413964	0.324056	0.0567954	0.246535	0.67942	0.588948	0.185414	0.0274805	0.490783	0.804698
817	1110	RDN25-1	0.0738426	0.445408	0.868663	0.807624	0.392723	0.427617	0.269402	0.995385	0.903406	0.979865	0.943026	0.0334582	0.446453	0.774592	0.778235	0.396009	0.416347	0.143521	0.950203	0.78663	0.815866	0.555882	0.0142541	0.847294	0.949519	0.673862	0.706145	0.787588	0.502735	0.960787	0.928717	0.965422	0.901827	-0.027215	0.406104	0.669721	0.0884994	0.868561	0.611608	0.771706	0.273298	0.945576	0.817883	0.908421	-0.0184216	0.644176	0.871065
817	1124	RDN25-1	0.0893822	0.355345	0.821103	0.6981	0.397487	0.314826	0.502789	0.995385	0.903623	0.97977	0.968555	-0.0374214	0.394446	0.734771	0.107183	0.560544	0.625072	0.231806	0.507403	0.870117	0.906382	0.684408	0.041278	0.57693	0.859332	0.922661	0.618553	0.492027	0.800199	0.996787	0.900913	0.895638	0.957672	0.0690549	0.034849	0.116835	0.65434	0.18161	0.0383027	0.218573	0.864055	0.42728	0.141774	0.472376	-0.00185284	0.962951	0.985068
817	1133	RDN25-1	0.0790043	0.414159	0.854855	0.704523	0.612715	0.616594	0.609917	0.995385	0.941893	0.995892	0.978758	-0.0560362	0.202044	0.553228	0.0750347	0.18775	0.0916956	0.0903567	0.437808	0.58911	0.456394	0.462047	0.0627444	0.396177	0.780258	0.776817	0.657869	0.660009	0.650916	0.989426	0.916205	0.950413	0.929523	0.242648	5.54621e-14	1.01496e-12	3.0209e-06	2.70224e-05	3.17691e-08	1.39265e-08	4.07125e-05	0.000430393	5.52909e-07	2.40782e-07	0.0244386	0.540032	0.82687
817	1437	RDN25-1	0.0905892	0.34886	0.821103	0.295882	0.564879	0.351748	0.353077	0.952625	0.936631	0.979865	0.954535	-0.0071981	0.869929	0.966607	0.840666	0.558112	0.953589	0.943742	0.966858	0.869601	0.987875	0.992555	0.0255131	0.730305	0.911913	0.593962	0.971559	0.706335	0.710191	0.952173	0.996242	0.964131	0.933884	0.205772	2.17669e-10	2.38207e-09	3.52492e-07	0.000702945	7.99851e-08	4.47236e-08	6.71268e-06	0.00611701	1.25869e-06	6.94747e-07	0.028601	0.473269	0.791746
817	1449	RDN25-1	0.0357105	0.71239	0.940638	0.440928	0.648335	0.982486	0.924499	0.983998	0.947996	0.999493	0.995705	0.0572571	0.192373	0.543929	0.0583507	0.246199	0.698011	0.525341	0.401484	0.652878	0.929998	0.865914	0.117484	0.111238	0.478354	0.046521	0.128892	0.311639	0.242647	0.64174	0.633865	0.829184	0.840009	0.213639	4.20462e-11	4.94643e-10	4.27571e-09	1.44585e-05	6.49058e-06	8.84995e-07	1.75099e-07	0.000263152	6.43669e-05	1.00249e-05	-0.0135801	0.733505	0.913139
817	1450	RDN25-1	-0.0571517	0.554999	0.903104	0.929061	0.19199	0.327145	0.490066	0.995385	0.863948	0.979865	0.968555	0.00792785	0.856877	0.963595	0.29902	0.21439	0.483263	0.916741	0.738933	0.617104	0.854555	0.984953	0.0625505	0.397641	0.78033	0.175698	0.806702	0.803004	0.528863	0.803037	0.955671	0.965422	0.91261	0.208056	1.35947e-10	1.518e-09	5.92876e-09	0.0166455	2.25022e-05	3.39595e-07	2.19448e-07	0.0776981	0.000197778	4.31138e-06	0.0836436	0.0356745	0.216811
817	1888	RDN25-1	-0.0628254	0.516341	0.897613	0.870068	0.237822	0.475544	0.482107	0.995385	0.891056	0.979865	0.967897	0.0956685	0.0291589	0.177213	0.00837757	0.609257	0.0847219	0.0759918	0.140231	0.888537	0.44039	0.419947	0.0440569	0.551532	0.850983	0.270608	0.811905	0.666488	0.652723	0.865156	0.955671	0.953716	0.929523	0.277133	6.25457e-18	2.3412e-16	1.15722e-13	3.54124e-05	4.59469e-12	1.21024e-12	1.78893e-11	0.000535172	2.386e-10	5.88983e-11	0.0646206	0.104862	0.412189
817	2129	RDN25-1	0.00475411	0.96087	0.99535	0.645206	0.555795	0.970282	0.902143	0.99316	0.935373	0.999401	0.995705	0.0287723	0.512683	0.806098	0.656582	0.516535	0.576811	0.815079	0.917777	0.848939	0.894991	0.954503	-0.0489623	0.508072	0.835541	0.212963	0.175408	0.527878	0.399718	0.829626	0.70024	0.900013	0.898865	0.00284886	0.930712	0.976252	0.262871	0.217286	0.961809	0.7103	0.555772	0.474687	0.984665	0.873908	0.0683353	0.0863149	0.37093
817	2133	RDN25-1	-0.0382025	0.693292	0.937818	0.474408	0.413592	0.553467	0.644362	0.991911	0.908276	0.983595	0.981654	0.0638013	0.146259	0.468656	0.607681	0.822457	0.404554	0.262664	0.908499	0.959776	0.810827	0.713165	0.0129054	0.861591	0.955534	0.7748	0.667248	0.905325	0.958243	0.989252	0.920622	0.985113	0.984218	-0.0594759	0.0692415	0.199429	0.0314039	0.039047	0.0391768	0.0784995	0.130999	0.147861	0.144197	0.234962	0.0501268	0.208585	0.582223
817	2142	RDN25-1	0.0106865	0.912181	0.985618	0.953068	0.974803	0.88527	0.972451	0.996965	0.997597	0.997721	0.995705	-0.00562352	0.898206	0.973573	0.676604	0.746983	0.974897	0.794809	0.923647	0.93594	0.991882	0.949267	0.080273	0.277397	0.690663	0.435847	0.443995	0.28557	0.351821	0.912525	0.842792	0.820226	0.885001	0.0342559	0.295647	0.560012	0.695064	0.704431	0.334316	0.48532	0.883327	0.861516	0.59716	0.718143	0.0141007	0.723698	0.909448
817	2191	RDN25-1	-0.0124399	0.897845	0.983221	0.891858	0.985902	0.993074	0.83012	0.995385	0.999646	0.999984	0.994181	-0.0844896	0.0541711	0.271598	0.280212	0.249951	0.142525	0.0557709	0.724046	0.656669	0.558838	0.371995	-0.0650908	0.378717	0.765803	0.636559	0.557549	0.497931	0.343251	0.953659	0.88379	0.895638	0.885001	-0.00769536	0.81431	0.927156	0.671178	0.900377	0.922569	0.659666	0.871856	0.958976	0.973482	0.842781	-0.0143499	0.719019	0.90641
817	2197	RDN25-1	0.039689	0.681989	0.937233	0.765804	0.927686	0.710185	0.681484	0.995385	0.997597	0.997721	0.981654	0.0105678	0.810013	0.945159	0.972174	0.524052	0.85959	0.797001	0.98989	0.853264	0.966143	0.949267	-0.00205972	0.977801	0.995149	0.895252	0.551755	0.961643	0.999735	0.993093	0.88379	0.994797	0.999998	0.00439156	0.893376	0.961247	0.923065	0.39595	0.946855	0.867537	0.974614	0.667023	0.981693	0.947156	0.0494812	0.214513	0.589822
817	2220	RDN25-1	0.24055	0.0117497	0.240665	0.0385042	0.0188259	0.0092103	0.0159669	0.682845	0.449767	0.416074	0.506018	-0.0475997	0.278613	0.62989	0.149742	0.523067	0.588974	0.333117	0.581966	0.853264	0.899084	0.776803	0.0680812	0.357156	0.752158	0.638796	0.375712	0.261367	0.386109	0.953659	0.821493	0.815631	0.890455	0.259937	6.88341e-16	1.6672e-14	1.13003e-07	2.39564e-07	5.07277e-13	7.34082e-12	2.53821e-06	8.17629e-06	3.25152e-11	2.92298e-10	-0.00858946	0.829501	0.947206
817	2256	RDN25-1	0.00287758	0.976309	0.996313	0.964347	0.669487	0.924971	0.655847	0.996965	0.948917	0.997721	0.981654	-0.00310323	0.94372	0.98906	0.980335	0.511214	0.754412	0.423168	0.991488	0.845139	0.949519	0.810088	0.00127652	0.986241	0.995149	0.970169	0.607279	0.887221	0.578012	0.996787	0.895735	0.98256	0.920616	0.094666	0.00378245	0.0163939	0.0298246	0.0093263	0.0377885	0.000401188	0.125006	0.0498161	0.140266	0.0027385	-0.0432426	0.278101	0.652003
817	2258	RDN25-1	0.138517	0.150882	0.64727	0.138777	0.155857	0.348191	0.0922004	0.838404	0.812685	0.979865	0.790816	0.0470595	0.284109	0.635129	0.250378	0.317591	0.943737	0.107601	0.697232	0.731086	0.985339	0.492641	-0.0121247	0.869887	0.958049	0.974426	0.982641	0.481484	0.800023	0.996787	0.996242	0.892972	0.957672	0.0916753	0.00504917	0.0213231	0.0165816	0.0462868	0.223122	0.00140933	0.0793743	0.168713	0.473958	0.00847535	-0.0140101	0.725401	0.909582
817	2260	RDN25-1	0.0428916	0.657879	0.932919	0.676498	0.970991	0.74236	0.447561	0.99316	0.997597	0.997721	0.9646	0.0138468	0.752753	0.919578	0.78925	0.589357	0.927891	0.326484	0.954268	0.884619	0.985339	0.770852	0.0483268	0.5136	0.838306	0.549314	0.986054	0.621833	0.292841	0.94709	0.99744	0.940877	0.86051	-0.0370538	0.257934	0.513259	0.411855	0.11445	0.242386	0.945626	0.706498	0.313665	0.49726	0.98119	0.0468152	0.240276	0.618342
817	2264	RDN25-1	0.0236248	0.807355	0.957799	0.882727	0.99594	0.979301	0.657658	0.995385	0.999839	0.999477	0.981654	0.0553715	0.207455	0.560982	0.380697	0.609282	0.558923	0.11788	0.802582	0.888537	0.888245	0.506193	0.0190103	0.797304	0.931331	0.895318	0.952465	0.926824	0.606741	0.993093	0.994798	0.988048	0.929523	-0.0432059	0.187076	0.411641	0.247411	0.204801	0.0799154	0.575712	0.538152	0.454576	0.245635	0.791717	0.0241746	0.54442	0.82687
817	2266	RDN25-1	-0.0382008	0.693305	0.937818	0.448859	0.543298	0.621186	0.68563	0.983998	0.933691	0.995892	0.981654	0.0486327	0.268302	0.621859	0.881381	0.729066	0.465427	0.353217	0.977543	0.930309	0.845285	0.786954	0.0812115	0.271801	0.686482	0.617782	0.534043	0.382349	0.319232	0.952173	0.883318	0.847197	0.864274	0.000968212	0.976426	0.992831	0.372892	0.617825	0.775936	0.95825	0.680529	0.816722	0.905277	0.987127	0.0274869	0.490682	0.804698
817	2278	RDN25-1	-0.0188347	0.84587	0.96663	0.935128	0.882613	0.447101	0.846445	0.995385	0.997597	0.979865	0.995705	-0.0745374	0.0895104	0.356436	0.231897	0.514276	0.00743021	0.124549	0.684819	0.848288	0.115542	0.519201	-0.00735819	0.920817	0.975609	0.970668	0.751534	0.402873	0.916596	0.996787	0.93968	0.854521	0.976414	0.0269075	0.41143	0.673584	0.402501	0.245715	0.42134	0.502694	0.695445	0.51087	0.680566	0.731901	-0.0347863	0.383016	0.738715
817	2280	RDN25-1	-0.0544015	0.574227	0.908626	0.452098	0.282115	0.635321	0.532939	0.983998	0.891056	0.995892	0.968555	-0.0519666	0.236821	0.595217	0.15852	0.0626128	0.356268	0.214578	0.591746	0.356934	0.778284	0.665881	0.0954378	0.196271	0.609894	0.3787	0.695678	0.198554	0.270679	0.889191	0.925325	0.790649	0.856568	0.175157	7.14081e-08	5.40731e-07	0.000583186	0.0303085	4.02944e-06	1.52989e-05	0.00430518	0.121708	4.25298e-05	0.000130963	0.0617477	0.121265	0.443837
817	2281	RDN25-1	0.0271148	0.779574	0.954043	0.836457	0.794279	0.939878	0.774278	0.995385	0.984347	0.997721	0.98932	-0.0441569	0.314897	0.665771	0.354506	0.103661	0.202221	0.39207	0.785533	0.454794	0.632664	0.797288	0.141013	0.0555484	0.332684	0.0950068	0.317453	0.121463	0.0672161	0.714854	0.779797	0.734505	0.646328	0.263954	2.36659e-16	6.33783e-15	2.75524e-09	5.23616e-05	2.58747e-10	2.30099e-12	1.20679e-07	0.000728075	8.60742e-09	1.04259e-10	0.0552559	0.16565	0.511866
817	2288	RDN25-1	0.0244715	0.800591	0.957799	0.629878	0.41943	0.739251	0.815433	0.99316	0.908276	0.997721	0.993411	0.0544275	0.215319	0.571986	0.136088	0.0550556	0.199344	0.274338	0.554478	0.338843	0.630113	0.722442	-0.0865502	0.241426	0.653999	0.454602	0.782261	0.329001	0.266368	0.912525	0.947498	0.836691	0.849995	0.219839	1.09925e-11	1.39805e-10	2.18534e-08	7.23699e-08	4.3535e-09	9.67379e-09	6.17535e-07	2.97169e-06	9.53416e-08	1.72944e-07	-0.0627308	0.11544	0.431622
817	2314	RDN25-1	-0.0992146	0.304692	0.804026	0.239069	0.478675	0.298237	0.432522	0.925971	0.919699	0.975159	0.9646	-0.0121512	0.782216	0.931488	0.512817	0.859776	0.705005	0.879398	0.867048	0.967482	0.933377	0.971033	-0.0730666	0.322957	0.726312	0.238503	0.562114	0.312455	0.495989	0.843589	0.88379	0.830265	0.901827	0.014583	0.656244	0.857804	0.849081	0.480155	0.843137	0.378527	0.952395	0.731931	0.939062	0.642615	-0.0229488	0.565021	0.838365
817	2337	RDN25-1	0.0790735	0.413749	0.854855	0.468375	0.558448	0.44237	0.516182	0.98922	0.935373	0.979865	0.968555	0.00274074	0.950286	0.990223	0.985351	0.828593	0.968291	0.832811	0.993446	0.961991	0.991557	0.960892	0.0347883	0.638278	0.879605	0.703549	0.828061	0.667021	0.782983	0.968025	0.95856	0.953716	0.95484	0.290865	1.14478e-19	5.23738e-18	3.07367e-11	9.65389e-08	5.22218e-14	1.65465e-13	2.24378e-09	3.78663e-06	3.92111e-12	9.4531e-12	0.0159767	0.688744	0.893061
817	2340	RDN25-1	0.00640834	0.947271	0.994997	0.909734	0.654893	0.789676	0.962219	0.995385	0.947996	0.997721	0.995705	0.00103087	0.981291	0.999169	0.749416	0.48243	0.512984	0.991017	0.939996	0.826484	0.872007	0.998448	-0.017184	0.816413	0.936888	0.664641	0.775405	0.520516	0.811492	0.959472	0.947044	0.895819	0.962522	-0.0671012	0.0403378	0.131427	0.0550625	0.634321	0.0110567	0.0765298	0.199317	0.827834	0.0517951	0.230643	-0.0418898	0.293426	0.663797
817	2347	RDN25-1	-0.115747	0.23071	0.751726	0.259102	0.115107	0.210503	0.179915	0.944125	0.77498	0.935424	0.888754	-0.0262447	0.550418	0.832885	0.609231	0.18891	0.447199	0.344108	0.909692	0.589319	0.829386	0.784391	0.0250172	0.73535	0.913709	0.770954	0.73746	0.865879	0.952055	0.989048	0.93702	0.973492	0.981946	0.115092	0.000424495	0.00212505	0.0102199	0.247149	0.00882843	0.0141193	0.0529743	0.512705	0.0424929	0.0621532	0.0540239	0.175302	0.529101
817	2349	RDN25-1	-0.0888936	0.357992	0.821103	0.340497	0.438693	0.287306	0.275516	0.961935	0.911332	0.96429	0.943026	0.00340735	0.938216	0.98641	0.900552	0.885359	0.745781	0.706778	0.979103	0.973148	0.945949	0.920765	0.1329	0.0713277	0.373472	0.130246	0.108521	0.149265	0.15553	0.773946	0.610691	0.761686	0.772356	0.121434	0.000199223	0.00104165	0.0119604	0.0165224	0.00984627	0.00993591	0.0607969	0.0772611	0.0467921	0.0469633	-0.00540779	0.892158	0.964732
817	2351	RDN25-1	-0.0059825	0.95077	0.99535	0.713585	0.98159	0.887694	0.788069	0.995385	0.999442	0.997721	0.98932	0.00690676	0.875149	0.967723	0.342082	0.865	0.975395	0.768417	0.777591	0.967482	0.992004	0.942279	-0.0367467	0.619479	0.875858	0.927392	0.701036	0.567776	0.459948	0.996787	0.925325	0.925464	0.90041	-0.00896835	0.784297	0.915801	0.42873	0.917891	0.660886	0.434365	0.722828	0.96763	0.847873	0.682313	-0.00348783	0.930322	0.975949
817	2416	RDN25-1	0.178496	0.0633102	0.500105	0.033529	0.0504097	0.104189	0.0820463	0.649659	0.646813	0.903656	0.789302	-0.0563961	0.199157	0.550259	0.772875	0.678193	0.155244	0.224094	0.949698	0.920051	0.574875	0.672909	-0.0445729	0.546877	0.848922	0.964119	0.876081	0.455667	0.542333	0.996787	0.976483	0.876784	0.91261	0.0805396	0.0138123	0.052477	0.00629509	0.0354716	0.0949348	0.0463642	0.0351989	0.137087	0.274062	0.158446	-0.0310768	0.435814	0.771123
817	2417	RDN25-1	-0.0494583	0.609548	0.916441	0.528954	0.421833	0.673806	0.536177	0.99193	0.908276	0.99705	0.968555	0.0430428	0.327274	0.677161	0.615691	0.925349	0.320317	0.547716	0.912084	0.985674	0.755638	0.873421	0.0565735	0.444343	0.798779	0.619318	0.823846	0.42498	0.583599	0.952173	0.95856	0.866445	0.922247	0.246086	2.37921e-14	4.66495e-13	1.27867e-07	5.73656e-05	8.41495e-11	9.25681e-10	2.80029e-06	0.000781123	3.205e-09	2.09715e-08	0.0373233	0.349263	0.715469
817	2421	RDN25-1	-0.025954	0.788785	0.954673	0.644759	0.985607	0.651467	0.502053	0.99316	0.999646	0.995892	0.968555	0.00999544	0.820122	0.947375	0.822681	0.578087	0.83805	0.510134	0.964052	0.878157	0.963255	0.860037	0.106123	0.150516	0.546852	0.300922	0.132051	0.275241	0.415171	0.867306	0.634725	0.815631	0.90041	0.318722	1.699e-23	1.24367e-21	4.47586e-12	2.68319e-11	5.69722e-15	1.2511e-13	4.05605e-10	3.91746e-09	5.54529e-13	7.47249e-12	-0.024005	0.547248	0.82687
817	2619	RDN25-1	-0.00683401	0.943774	0.994477	0.342595	0.871464	0.904159	0.902238	0.961935	0.996609	0.997721	0.995705	0.0484332	0.270272	0.621859	0.418507	0.536272	0.175243	0.168047	0.823026	0.861972	0.600006	0.598413	0.0188063	0.799432	0.931331	0.370122	0.925079	0.631566	0.627848	0.889191	0.989779	0.942067	0.929523	0.166185	3.26274e-07	2.29157e-06	0.0889076	0.00313019	2.50373e-06	1.456e-06	0.274236	0.0205654	2.77628e-05	1.5877e-05	0.0106577	0.78932	0.935151
817	2634	RDN25-1	0.0399267	0.680189	0.937233	0.568994	0.595573	0.639006	0.812263	0.99316	0.941893	0.995892	0.99285	-0.0134626	0.759399	0.922593	0.912722	0.0699683	0.912377	0.552451	0.980658	0.379911	0.985339	0.876716	-0.0297006	0.688182	0.895433	0.899147	0.142716	0.78357	0.563418	0.993093	0.652273	0.965422	0.916251	-0.0378685	0.247607	0.500686	0.677343	0.0109786	0.451129	0.167158	0.873434	0.0566835	0.704526	0.401669	0.0970244	0.0147627	0.125655
817	2640	RDN25-1	0.0368437	0.703682	0.938813	0.852191	0.988235	0.807191	0.735821	0.995385	0.999646	0.997721	0.985471	0.0696839	0.11248	0.411591	0.330611	0.608212	0.245921	0.171331	0.777131	0.888537	0.676733	0.601412	0.0869279	0.23937	0.651197	0.393419	0.574246	0.341802	0.282143	0.899273	0.887706	0.836691	0.856568	0.261155	4.98918e-16	1.24503e-14	1.9965e-08	1.66701e-05	1.23797e-10	9.13902e-12	5.76572e-07	0.000290126	4.51857e-09	3.58468e-10	0.0384357	0.335078	0.706677
817	2724	RDN25-1	0.0118224	0.90289	0.983831	0.468954	0.726966	0.952977	0.975966	0.98922	0.964757	0.998599	0.995705	0.0691318	0.115363	0.417131	0.0135464	0.119581	0.203344	0.218857	0.181132	0.48376	0.63392	0.666113	0.0920539	0.21268	0.624948	0.0562331	0.172496	0.274231	0.288354	0.647478	0.69934	0.815631	0.86051	0.269249	5.63112e-17	1.78355e-15	2.38281e-14	1.3462e-08	9.87362e-12	5.87527e-12	4.81695e-12	6.67512e-07	4.80516e-10	2.41253e-10	-0.0259196	0.51575	0.816437
817	2729	RDN25-1	-0.0592	0.540884	0.903104	0.245651	0.780782	0.820276	0.674179	0.927546	0.980795	0.997721	0.981654	-0.0174607	0.691192	0.891947	0.141524	0.84799	0.709245	0.983696	0.566961	0.96724	0.935435	0.997743	0.0451734	0.541483	0.848386	0.840597	0.390755	0.30443	0.433342	0.989652	0.832888	0.823258	0.90041	0.291525	9.3914e-20	4.35708e-18	8.37643e-08	5.78662e-10	2.41373e-17	3.50946e-16	1.96547e-06	5.63231e-08	3.17165e-15	3.29388e-14	-0.0291739	0.464448	0.787386
817	2735	RDN25-1	0.0111277	0.908572	0.984809	0.887821	0.88756	0.876222	0.912227	0.995385	0.997597	0.997721	0.995705	0.0501017	0.254094	0.610493	0.31815	0.697932	0.270747	0.307122	0.760811	0.920793	0.703781	0.751506	-0.0187816	0.79969	0.931331	0.852117	0.602031	0.859573	0.812313	0.989652	0.89356	0.971208	0.962522	-0.0383556	0.241574	0.49272	0.434289	0.222979	0.39744	0.324326	0.725564	0.481585	0.654431	0.59649	0.026408	0.507868	0.813126
817	2791	RDN25-1	-0.0976713	0.312313	0.806901	0.406148	0.1369	0.416969	0.394253	0.978595	0.786605	0.979865	0.9646	0.0318172	0.469077	0.788784	0.420812	0.612184	0.347155	0.381424	0.82345	0.889724	0.770515	0.793782	0.0108193	0.88379	0.96294	0.784785	0.548501	0.743626	0.779346	0.989652	0.88379	0.964961	0.953502	0.116595	0.000356018	0.00180142	0.00387196	0.307054	0.000868205	0.000949574	0.0232318	0.576383	0.00545848	0.00592751	0.0627413	0.115379	0.431622
817	2793	RDN25-1	0.0361034	0.709367	0.940638	0.677282	0.65085	0.63853	0.627924	0.99316	0.947996	0.995892	0.978758	0.0202713	0.644661	0.879302	0.271291	0.588432	0.51922	0.495782	0.714381	0.884619	0.874686	0.853252	-0.0141165	0.84875	0.949519	0.251826	0.987962	0.977362	0.991041	0.851795	0.997669	0.999074	0.997875	0.187972	7.09497e-09	6.13408e-08	0.0128485	0.000133908	3.5525e-07	1.61399e-07	0.0649343	0.00152342	4.71513e-06	2.19771e-06	-0.0128091	0.748108	0.919503
817	2815	RDN25-1	0.153556	0.110901	0.598865	0.0648565	0.161953	0.224564	0.0911623	0.740846	0.821376	0.939331	0.790816	-0.0172079	0.695439	0.894233	0.706368	0.733786	0.336686	0.999437	0.934294	0.930859	0.765407	0.999437	-0.0490382	0.507414	0.835345	0.887035	0.543456	0.31332	0.685858	0.993093	0.88379	0.830882	0.931551	0.257295	1.37565e-15	3.23671e-14	1.44664e-11	1.0425e-06	4.70498e-09	5.14674e-13	1.08622e-09	2.82444e-05	1.0135e-07	2.60109e-11	0.00358396	0.928406	0.975949
817	2826	RDN25-1	-0.0648516	0.502877	0.893461	0.569704	0.170864	0.357816	0.606243	0.99316	0.828398	0.979865	0.978758	-0.0272791	0.534811	0.819	0.688843	0.0709871	0.259091	0.763034	0.9255	0.383068	0.692666	0.941453	0.154085	0.0362511	0.264482	0.0485607	0.404736	0.110392	0.0330227	0.64174	0.834248	0.729436	0.535701	-0.0432683	0.186439	0.410789	0.399019	0.0174267	0.0685683	0.427121	0.693074	0.0803589	0.216584	0.67768	0.0829165	0.0373154	0.222676
817	2843	RDN25-1	0.0811384	0.401622	0.845176	0.441577	0.669416	0.486629	0.368415	0.983998	0.948917	0.979865	0.956928	0.0185815	0.672484	0.883521	0.746351	0.786308	0.867215	0.557447	0.939954	0.947704	0.970446	0.878151	0.0893199	0.226638	0.638072	0.279135	0.530238	0.316178	0.204615	0.86612	0.883318	0.832328	0.815135	-0.0060143	0.854358	0.947466	0.871595	0.438658	0.682094	0.912639	0.957682	0.694657	0.854413	0.967103	0.0351449	0.378127	0.737129
817	2865	RDN25-1	0.0770975	0.425551	0.854855	0.336883	0.696713	0.505701	0.425015	0.961935	0.953894	0.979865	0.9646	0.0099507	0.820913	0.947375	0.543241	0.68067	0.988899	0.776943	0.883439	0.920051	0.993996	0.944054	-0.0822796	0.265525	0.677936	0.464632	0.174909	0.246387	0.318672	0.912596	0.70024	0.809322	0.864274	-0.0188669	0.564697	0.799017	0.930475	0.309921	0.478595	0.701549	0.975773	0.579695	0.726182	0.870021	0.035099	0.378751	0.737129
817	2870	RDN25-1	0.122083	0.206007	0.725105	0.135785	0.485197	0.246946	0.155439	0.831806	0.920475	0.945948	0.868651	0.0612645	0.163017	0.492641	0.0806514	0.817556	0.253669	0.0903698	0.452889	0.958016	0.685846	0.462047	0.206098	0.00488501	0.0885639	0.00307355	0.0618385	0.00968974	0.00332589	0.278527	0.541705	0.377727	0.301394	-0.00138043	0.966394	0.990849	0.482646	0.36047	0.883997	0.59608	0.759425	0.633444	0.960431	0.803267	0.0472017	0.236412	0.617558
817	2880	RDN25-1	0.041272	0.670031	0.936421	0.450758	0.544041	0.775605	0.541836	0.983998	0.933691	0.997721	0.969138	0.0373858	0.394895	0.734771	0.165312	0.255762	0.612954	0.236543	0.602932	0.661897	0.899084	0.689938	0.186581	0.0109922	0.130232	0.0056403	0.34466	0.0256114	0.00773397	0.321497	0.802274	0.484222	0.362944	-0.026696	0.415119	0.676931	0.812955	0.0119789	0.327392	0.879731	0.935583	0.0605393	0.590925	0.949879	0.106482	0.00742587	0.0799373
817	2921	RDN25-1	0.15133	0.116234	0.602415	0.0549231	0.39863	0.143048	0.0964711	0.725316	0.903623	0.912294	0.790816	0.0160782	0.714529	0.902317	0.238145	0.460047	0.791292	0.504361	0.692045	0.81305	0.957145	0.85894	-0.0540052	0.465327	0.814279	0.934851	0.183396	0.471784	0.635599	0.996787	0.705579	0.886874	0.929523	0.0348316	0.287601	0.549512	0.0647798	0.619454	0.420673	0.183882	0.221957	0.818464	0.679907	0.427647	0.0611719	0.124781	0.448231
817	2922	RDN25-1	0.15133	0.116234	0.602415	0.0585573	0.23455	0.149904	0.0883858	0.727305	0.891056	0.912294	0.789302	-0.00665477	0.879669	0.968372	0.482127	0.616238	0.808991	0.770317	0.849215	0.892005	0.958216	0.943333	-0.0310112	0.675187	0.891616	0.869194	0.525635	0.645306	0.898854	0.990136	0.883318	0.944693	0.97412	0.044993	0.169471	0.386057	0.0444401	0.692354	0.318193	0.0890408	0.170744	0.855433	0.583132	0.258849	0.0239836	0.547604	0.82687
817	2923	RDN25-1	0.0315985	0.744291	0.945193	0.496356	0.724989	0.820831	0.670746	0.99193	0.96306	0.997721	0.981654	0.0204941	0.641029	0.877618	0.266937	0.42151	0.809467	0.513027	0.707881	0.793956	0.958216	0.860393	0.015839	0.830557	0.94309	0.500084	0.534764	0.925806	0.726557	0.931858	0.883318	0.988048	0.937588	0.0298363	0.36239	0.62827	0.120832	0.454119	0.59027	0.284943	0.337815	0.711643	0.805999	0.552642	0.0695298	0.0809469	0.358868
817	2944	RDN25-1	0.0977506	0.311919	0.806901	0.580313	0.44343	0.500638	0.333061	0.99316	0.911332	0.979865	0.947278	0.0397225	0.366001	0.708347	0.989003	0.688181	0.833494	0.413251	0.994141	0.920285	0.963255	0.805214	-0.142958	0.0522297	0.319493	0.0239126	0.0663245	0.0286056	0.0683711	0.541726	0.54828	0.495547	0.646328	-0.0343986	0.293639	0.558218	0.0925453	0.350666	0.108711	0.38264	0.280445	0.624356	0.299154	0.644323	0.015205	0.703048	0.899859
817	2946	RDN25-1	-0.0218085	0.82191	0.960697	0.746795	0.936787	0.898701	0.752051	0.995385	0.997597	0.997721	0.986501	-0.0435323	0.321798	0.670567	0.303382	0.619939	0.860852	0.273044	0.742354	0.892005	0.966804	0.721896	0.0759432	0.304222	0.711447	0.431176	0.302711	0.161031	0.40362	0.912525	0.766773	0.778329	0.90041	0.29471	3.58669e-20	1.73743e-18	5.52822e-11	2.49513e-09	1.48344e-17	4.23409e-14	3.8232e-09	1.77222e-07	2.05183e-15	2.85313e-12	-0.0132371	0.739989	0.916625
817	2948	RDN25-1	-0.136318	0.157539	0.652395	0.143979	0.0787864	0.146452	0.204906	0.843958	0.72143	0.912294	0.911157	0.0243239	0.579977	0.846829	0.862082	0.640724	0.792157	0.510031	0.972736	0.90534	0.957145	0.860037	-0.0530606	0.473179	0.815793	0.404351	0.221449	0.416467	0.567203	0.900743	0.721772	0.863232	0.916489	0.326567	1.19199e-24	1.00678e-22	3.42059e-13	7.37585e-08	1.48285e-16	4.01991e-19	4.73122e-11	2.98211e-06	1.77133e-14	7.04288e-17	0.0528131	0.18519	0.54563
817	2959	RDN25-1	-0.122312	0.20515	0.725105	0.162258	0.145903	0.217127	0.370704	0.869571	0.797686	0.935424	0.958558	0.0535928	0.22245	0.577399	0.563932	0.751489	0.311439	0.0825057	0.886189	0.93594	0.746276	0.438457	0.246902	0.000703846	0.0249298	0.00494506	0.0119626	0.00165436	0.000309646	0.321497	0.297101	0.289844	0.0740546	0.243801	4.18212e-14	7.78299e-13	3.76548e-07	5.45586e-05	6.07557e-10	5.02216e-13	7.06835e-06	0.000753099	1.83524e-08	2.58789e-11	0.0342689	0.390136	0.740714
817	2975	RDN25-1	0.00734593	0.93957	0.99388	0.63333	0.606728	0.894814	0.829041	0.99316	0.941893	0.997721	0.994181	0.0673796	0.124897	0.434896	0.845853	0.0582573	0.139786	0.438076	0.969007	0.342279	0.557435	0.821158	-0.0276873	0.708325	0.90321	0.299523	0.812047	0.785523	0.46868	0.867306	0.955671	0.965422	0.90041	0.0866213	0.00808008	0.0325376	0.503086	0.0110228	0.0191353	0.138695	0.770532	0.0567997	0.081109	0.356645	-0.0482663	0.225996	0.604247
867	876	RDN25-1	0.0190925	0.843787	0.96663	0.734725	0.421899	0.342042	0.429625	0.995385	0.908276	0.979865	0.9646	0.0952687	0.0298424	0.178729	0.444023	0.865405	0.679509	0.935735	0.833495	0.967482	0.922868	0.99125	0.154838	0.0353389	0.259836	0.212917	0.562681	0.613823	0.472283	0.829626	0.88379	0.939224	0.90041	0.186736	8.92811e-09	7.63875e-08	0.00250793	0.118338	0.0666914	0.0212971	0.015939	0.321939	0.2127	0.0861057	0.105527	0.00797864	0.084236
867	898	RDN25-1	0.189452	0.0484904	0.451084	0.0563725	0.14924	0.0361701	0.0953784	0.727305	0.800012	0.67173	0.790816	0.060881	0.165672	0.497469	0.206967	0.681342	0.0952028	0.427778	0.653178	0.920051	0.467637	0.813298	-0.0325346	0.660201	0.887146	0.753789	0.430033	0.896589	0.488693	0.984684	0.838286	0.984067	0.90041	0.0515755	0.11522	0.298142	0.188476	0.766732	0.062705	0.444801	0.454417	0.896739	0.202587	0.69066	0.0358346	0.368834	0.73057
867	908	RDN25-1	0.0376478	0.697527	0.937818	0.907532	0.615407	0.926187	0.925453	0.995385	0.942478	0.997721	0.995705	0.0606087	0.167577	0.50136	0.513964	0.205954	0.514864	0.50824	0.867048	0.609645	0.872078	0.860037	0.0925926	0.210004	0.622824	0.409927	0.206434	0.413858	0.41087	0.900743	0.711676	0.863232	0.90041	0.133195	4.43854e-05	0.000245311	0.0148903	0.00460536	0.00769682	0.00641828	0.073007	0.028344	0.0378473	0.0321894	-0.0166444	0.676458	0.886081
867	960	RDN25-1	0.10623	0.271594	0.790818	0.584231	0.379102	0.221593	0.302723	0.99316	0.898391	0.936384	0.943026	0.0406967	0.354354	0.699152	0.868177	0.633225	0.23713	0.427474	0.97313	0.900496	0.670806	0.813298	-0.0364748	0.622074	0.876063	0.291484	0.579437	0.817598	0.627642	0.867306	0.887706	0.967816	0.929523	0.00210526	0.948768	0.983602	0.285622	0.859096	0.60825	0.991324	0.584591	0.944329	0.817638	0.997515	0.0115428	0.772286	0.929112
867	966	RDN25-1	-0.0609352	0.529066	0.901809	0.200296	0.18852	0.14752	0.116772	0.905288	0.860098	0.912294	0.825593	0.0539366	0.219492	0.576287	0.732812	0.656853	0.508614	0.363314	0.937942	0.912705	0.867453	0.787075	0.106683	0.148361	0.545276	0.67056	0.764725	0.799136	0.915187	0.959472	0.944046	0.965422	0.976414	0.0716713	0.0285054	0.0983212	0.989954	0.860291	0.702504	0.488289	0.996969	0.944329	0.870477	0.7197	0.0809739	0.0420175	0.238801
867	986	RDN25-1	0.0957765	0.321838	0.814031	0.315663	0.271196	0.324353	0.224096	0.952625	0.891056	0.97977	0.931423	0.00269385	0.951135	0.990223	0.836358	0.675689	0.883487	0.53632	0.966225	0.920051	0.976236	0.867538	0.0216543	0.769853	0.92287	0.712639	0.607311	0.739868	0.530336	0.968644	0.895735	0.964961	0.91261	0.00990554	0.762401	0.906952	0.680673	0.537384	0.714501	0.332545	0.874325	0.772456	0.873828	0.602709	-0.0228806	0.566178	0.838365
867	990	RDN25-1	0.0699197	0.470016	0.876756	0.470231	0.444083	0.354289	0.418418	0.98922	0.911332	0.979865	0.9646	-0.00229941	0.958283	0.99218	0.957568	0.864863	0.654787	0.837874	0.987493	0.967482	0.916493	0.962383	0.128435	0.0814592	0.398877	0.100017	0.101702	0.0520152	0.072161	0.728992	0.59797	0.599066	0.669012	-0.0310969	0.342457	0.609786	0.560092	0.72924	0.869773	0.629394	0.806307	0.87991	0.954882	0.825372	-0.0127041	0.750103	0.921254
867	1004	RDN25-1	0.133048	0.167836	0.666385	0.545065	0.167587	0.191019	0.328589	0.99193	0.821887	0.924639	0.945063	0.0530555	0.227128	0.583352	0.741906	0.262864	0.289313	0.703109	0.938724	0.668739	0.724391	0.920663	0.154853	0.0353203	0.259836	0.296288	0.0479	0.0488835	0.121858	0.867306	0.49435	0.59475	0.747893	0.00778896	0.812093	0.926259	0.15687	0.663382	0.849514	0.493927	0.406162	0.841863	0.943186	0.723949	-0.0153495	0.700362	0.899859
867	1042	RDN25-1	0.0468172	0.6288	0.923362	0.716468	0.407249	0.646238	0.728896	0.995385	0.906079	0.995892	0.985471	0.0335975	0.444562	0.77358	0.647768	0.211725	0.499858	0.653943	0.917777	0.616518	0.863163	0.908904	0.0940678	0.2028	0.614497	0.296125	0.113713	0.232933	0.292824	0.867306	0.625185	0.808587	0.86051	0.0138127	0.673323	0.868753	0.914472	0.287404	0.727078	0.953665	0.970459	0.55719	0.878172	0.985858	-0.0427185	0.283972	0.656424
867	1052	RDN25-1	0.0207944	0.830063	0.961741	0.847691	0.728654	0.978849	0.878945	0.995385	0.964757	0.999477	0.995705	-0.076544	0.0811888	0.336397	0.0289666	0.0272465	0.057374	0.095612	0.288543	0.230566	0.354906	0.475887	-0.0456762	0.536987	0.848386	0.289435	0.230121	0.420101	0.517008	0.867306	0.731995	0.863232	0.905631	-0.013072	0.689907	0.876081	0.226322	0.17942	0.432436	0.636384	0.512727	0.423264	0.689588	0.830396	0.0582368	0.143952	0.483854
867	1056	RDN25-1	0.0382719	0.692763	0.937818	0.391599	0.876407	0.796627	0.70608	0.975984	0.997597	0.997721	0.981654	-0.0056262	0.898157	0.973573	0.399798	0.320565	0.724348	0.910763	0.812906	0.731086	0.942318	0.982144	0.0881586	0.232758	0.64429	0.0880038	0.700967	0.334119	0.260794	0.700805	0.925325	0.836691	0.844052	0.0377132	0.249553	0.503694	0.04647	0.743828	0.51622	0.329839	0.177247	0.889299	0.75536	0.601219	0.0550489	0.167242	0.513494
867	1110	RDN25-1	0.0335171	0.729349	0.94474	0.367313	0.845298	0.432514	0.246884	0.966779	0.991692	0.979865	0.943026	-0.0672703	0.125512	0.435654	0.896138	0.19179	0.677887	0.729442	0.97893	0.591727	0.921828	0.927867	-0.106479	0.149145	0.545276	0.568764	0.168613	0.446578	0.774985	0.947275	0.693421	0.870306	0.952628	-0.0287721	0.379771	0.64516	0.478315	0.438199	0.652449	0.152199	0.757263	0.694564	0.845978	0.378768	0.0124344	0.755236	0.923783
867	1124	RDN25-1	-0.153803	0.110321	0.597692	0.108268	0.0531026	0.124934	0.12969	0.797	0.646813	0.912294	0.845243	0.104405	0.0172386	0.121854	0.0852814	0.406743	0.0387836	0.0319673	0.464315	0.789996	0.301486	0.27432	0.0468459	0.526601	0.844368	0.671139	0.933962	0.568219	0.545258	0.959472	0.991885	0.925464	0.91261	0.0606489	0.0639198	0.186659	0.275896	0.900288	0.13719	0.113599	0.572607	0.958976	0.349362	0.308727	0.0540094	0.175418	0.529101
867	1133	RDN25-1	-0.064139	0.507591	0.895499	0.306578	0.433567	0.380995	0.401828	0.952625	0.911332	0.979865	0.9646	0.00851413	0.84642	0.957048	0.530698	0.845423	0.736847	0.797373	0.869607	0.96724	0.943634	0.949267	0.145253	0.0485251	0.305624	0.20261	0.146484	0.126179	0.111812	0.818361	0.657495	0.734505	0.736249	0.0933913	0.00428215	0.0183664	0.248138	0.168382	0.0849039	0.0618604	0.538152	0.408219	0.254684	0.19634	0.0204316	0.608461	0.85107
867	1437	RDN25-1	0.0382374	0.693026	0.937818	0.861697	0.906887	0.911999	0.806586	0.995385	0.997597	0.997721	0.991006	0.0150851	0.731459	0.909739	0.442548	0.86333	0.811739	0.328173	0.832851	0.967482	0.958216	0.772103	0.157266	0.0325268	0.249751	0.210801	0.124983	0.0962449	0.22547	0.829626	0.6305	0.718301	0.837195	0.0730471	0.0255875	0.0902411	0.706279	0.370944	0.244349	0.797008	0.888315	0.643034	0.498274	0.918384	0.0256052	0.520856	0.819341
867	1449	RDN25-1	0.0706564	0.46534	0.876756	0.623847	0.417625	0.839485	0.884282	0.99316	0.908276	0.997721	0.995705	0.0685116	0.11867	0.423052	0.363248	0.162118	0.710119	0.796818	0.791162	0.556924	0.935435	0.949267	0.0106891	0.88518	0.96294	0.912076	0.75064	0.618611	0.5652	0.996787	0.93968	0.940259	0.916489	0.0697324	0.0331005	0.111571	0.260127	0.102933	0.618543	0.720557	0.554432	0.292127	0.823421	0.879447	-0.0168529	0.672637	0.883351
867	1450	RDN25-1	0.0612848	0.526701	0.901809	0.348098	0.382674	0.525292	0.700334	0.961935	0.900328	0.979865	0.981654	0.0619615	0.158275	0.485889	0.0674267	0.120008	0.18858	0.417654	0.422905	0.48376	0.616975	0.807265	0.0265682	0.719609	0.907141	0.440985	0.491738	0.703585	0.955367	0.912525	0.866615	0.964131	0.984194	0.0740978	0.0235363	0.0843947	0.0130089	0.0436602	0.0500993	0.180052	0.065493	0.16115	0.172331	0.422233	-0.0330048	0.407867	0.754448
867	1888	RDN25-1	-0.105679	0.2741	0.793013	0.231873	0.444377	0.163751	0.103444	0.921357	0.911332	0.914659	0.79722	0.00571754	0.896513	0.973573	0.813314	0.634023	0.541177	0.272085	0.960892	0.901142	0.879693	0.721896	-0.00847458	0.908851	0.969789	0.741866	0.86337	0.572422	0.386037	0.978407	0.974316	0.92664	0.890455	0.0934891	0.00424178	0.018217	0.0906297	0.0275531	0.146965	0.381081	0.277271	0.114189	0.364707	0.6438	-0.0233856	0.557638	0.833755
867	2129	RDN25-1	0.148166	0.124156	0.614374	0.350885	0.230451	0.251079	0.243278	0.962515	0.891056	0.945948	0.94297	-0.0152577	0.728507	0.908634	0.210407	0.568374	0.34325	0.35287	0.65749	0.87301	0.766407	0.786954	0.172358	0.0189752	0.181747	0.135248	0.0746979	0.0725514	0.0679585	0.774359	0.560874	0.678334	0.646328	0.058423	0.0743225	0.208889	0.886254	0.464691	0.504716	0.470204	0.962428	0.720778	0.746844	0.709432	0.0196162	0.622844	0.857135
867	2133	RDN25-1	0.210166	0.028274	0.364788	0.102259	0.0307024	0.0370414	0.0439254	0.776692	0.585328	0.676006	0.712567	-0.0130358	0.766803	0.927257	0.295961	0.9058	0.789068	0.666346	0.73654	0.977227	0.957145	0.909692	-0.00756658	0.918582	0.974182	0.534225	0.883458	0.920749	0.841474	0.93919	0.979185	0.988048	0.966529	0.00993327	0.761756	0.906952	0.455123	0.569934	0.808356	0.963867	0.738766	0.793839	0.922447	0.988663	-0.020269	0.611318	0.852592
867	2142	RDN25-1	0.0974606	0.313363	0.806901	0.429459	0.272128	0.319798	0.472392	0.983974	0.891056	0.97977	0.967168	0.0255105	0.561629	0.839671	0.852197	0.447229	0.555756	0.985069	0.96959	0.80409	0.887658	0.99798	-0.0905903	0.220073	0.635836	0.192864	0.420056	0.271714	0.142446	0.809453	0.834248	0.815631	0.752226	-0.002514	0.93884	0.979891	0.68591	0.728713	0.9728	0.485154	0.876737	0.879677	0.991916	0.718143	-0.0209504	0.599387	0.849855
867	2191	RDN25-1	0.169053	0.0788678	0.534704	0.113495	0.0400376	0.140686	0.0664949	0.808586	0.646813	0.912294	0.788575	0.00888355	0.839844	0.955371	0.955489	0.324961	0.820775	0.610453	0.987493	0.731086	0.960372	0.892253	0.0392903	0.595427	0.870092	0.68226	0.295831	0.808987	0.480788	0.960856	0.766773	0.965422	0.90041	-0.00903137	0.782819	0.915506	0.737682	0.426607	0.461747	0.85403	0.904238	0.685308	0.712876	0.944878	-0.051253	0.198529	0.566204
867	2197	RDN25-1	0.00998451	0.91793	0.986829	0.93191	0.414202	0.869556	0.747401	0.995385	0.908276	0.997721	0.986029	0.00501795	0.909117	0.975228	0.941756	0.173022	0.662849	0.571582	0.983651	0.571951	0.918274	0.880681	0.083621	0.257785	0.668914	0.311006	0.0614366	0.470886	0.175465	0.867306	0.539985	0.886858	0.788236	0.00469654	0.88602	0.959045	0.935394	0.118538	0.578292	0.47875	0.97759	0.32215	0.800711	0.713659	-0.0781303	0.0497953	0.26715
867	2220	RDN25-1	0.00609307	0.949861	0.99535	0.875082	0.327055	0.933789	0.757429	0.995385	0.892077	0.997721	0.987574	0.000200401	0.996363	0.999701	0.845579	0.101715	0.958507	0.603373	0.969007	0.449527	0.989553	0.891498	-0.0349938	0.636295	0.879381	0.762001	0.454298	0.680221	0.902416	0.98658	0.849793	0.957881	0.97412	0.12253	0.000174155	0.000912028	0.00272979	2.73188e-05	0.00156306	0.00013136	0.0171624	0.000432493	0.00914861	0.000964285	-0.0995315	0.0123683	0.114441
867	2256	RDN25-1	-0.0313664	0.746106	0.945193	0.897991	0.782691	0.866982	0.860988	0.995385	0.980795	0.997721	0.995705	-0.0129363	0.768532	0.927719	0.554584	0.85236	0.978753	0.46092	0.884911	0.96724	0.992939	0.830997	0.113675	0.123398	0.496101	0.0516734	0.181804	0.104567	0.0379016	0.64174	0.705579	0.723162	0.562742	0.0509471	0.119722	0.306422	0.0315762	0.322941	0.100185	0.00987871	0.131346	0.594737	0.283714	0.046777	-0.00155821	0.968839	0.988648
867	2258	RDN25-1	-0.0819249	0.397059	0.843013	0.462915	0.2547	0.256763	0.590602	0.988519	0.891056	0.947071	0.978758	0.0838853	0.0559215	0.275006	0.095256	0.481331	0.312882	0.0235295	0.489176	0.825677	0.746276	0.233342	0.0419111	0.571096	0.859332	0.559916	0.991661	0.917613	0.37882	0.94709	0.997698	0.98791	0.890455	0.0757773	0.0205534	0.0749754	0.0668817	0.511617	0.288049	0.0078473	0.22738	0.757482	0.551355	0.0381902	0.0410068	0.303729	0.674875
867	2260	RDN25-1	0.0468448	0.628598	0.923362	0.647605	0.416388	0.826998	0.580287	0.99316	0.908276	0.997721	0.978758	0.0829479	0.0587299	0.281378	0.119051	0.0423466	0.240108	0.0598721	0.527966	0.297073	0.673474	0.382832	0.00641659	0.930922	0.978625	0.930357	0.58446	0.81873	0.840419	0.996787	0.887706	0.967816	0.966529	0.00741519	0.820954	0.930496	0.855026	0.36264	0.665965	0.664463	0.952395	0.634077	0.847873	0.846703	-0.0409598	0.304284	0.674875
867	2264	RDN25-1	0.0728904	0.451313	0.870307	0.966617	0.746612	0.437409	0.660891	0.996965	0.972555	0.979865	0.981654	0.0370244	0.399484	0.739269	0.556693	0.986338	0.384654	0.85973	0.8857	0.998496	0.797891	0.964197	-0.00261937	0.971772	0.993816	0.382708	0.638588	0.962732	0.693966	0.890693	0.908411	0.994797	0.932074	0.00408418	0.900799	0.96367	0.14696	0.522431	0.793304	0.532126	0.386227	0.763229	0.916144	0.758366	0.0380699	0.339702	0.707766
867	2266	RDN25-1	0.0178593	0.853761	0.969755	0.934263	0.89856	0.94	0.665927	0.995385	0.997597	0.997721	0.981654	-0.0102354	0.815881	0.947375	0.495288	0.814884	0.473039	0.74702	0.858315	0.956033	0.849795	0.937073	-0.0788446	0.286064	0.695937	0.196543	0.337738	0.186371	0.501445	0.809968	0.794099	0.790649	0.901827	-0.0127053	0.698172	0.878215	0.379174	0.752213	0.335157	0.730104	0.680648	0.893274	0.597552	0.883252	0.00407917	0.918547	0.975754
867	2278	RDN25-1	0.0391519	0.686066	0.937718	0.725502	0.625436	0.867438	0.727691	0.995385	0.94725	0.997721	0.985471	0.0659402	0.133179	0.447504	0.238404	0.192725	0.844035	0.205203	0.692045	0.592376	0.963564	0.655252	-0.0130366	0.860198	0.954681	0.848052	0.994789	0.381408	0.831445	0.989652	0.997698	0.847197	0.96523	0.0119413	0.71551	0.886754	0.833971	0.630876	0.264606	0.832222	0.946231	0.827316	0.52313	0.930943	-0.0136025	0.733081	0.913139
867	2280	RDN25-1	-0.0599145	0.536002	0.901809	0.383537	0.605402	0.377968	0.298316	0.974792	0.941893	0.979865	0.943026	0.11449	0.00897268	0.0761753	0.11739	0.000159697	0.0886632	0.160304	0.527229	0.00892944	0.452354	0.584297	0.130084	0.0775882	0.388413	0.2204	0.00442753	0.202969	0.280684	0.832214	0.190122	0.795318	0.856568	0.0477016	0.145198	0.350904	0.70291	0.00209198	0.656519	0.96275	0.88682	0.0151452	0.847873	0.988323	-0.115326	0.00372096	0.0510436
867	2281	RDN25-1	-0.0252392	0.794471	0.955676	0.501819	0.971134	0.423411	0.30975	0.99193	0.997597	0.979865	0.943026	0.177052	4.9112e-05	0.00104371	0.0125849	0.000665202	0.0141203	0.0405631	0.17592	0.0246218	0.169444	0.316426	0.175147	0.0170989	0.170162	0.105259	0.0173949	0.128007	0.209429	0.737733	0.33613	0.734505	0.815135	0.129149	7.549e-05	0.000406979	0.0557412	0.00277786	0.0646732	0.183256	0.201072	0.018623	0.207776	0.426569	-0.0291484	0.464838	0.787605
867	2288	RDN25-1	-0.0354511	0.714389	0.940768	0.546173	0.576439	0.338829	0.39791	0.99193	0.941893	0.979865	0.9646	-0.0311301	0.478735	0.791692	0.276699	0.35916	0.061133	0.0965177	0.720881	0.76186	0.368481	0.478582	0.135472	0.0659726	0.360388	0.182214	0.198744	0.349304	0.276236	0.807776	0.709144	0.836691	0.856568	0.0871928	0.00767033	0.0310394	0.17755	0.239824	0.526113	0.343402	0.438952	0.501797	0.761358	0.61072	0.0249187	0.532098	0.825186
867	2314	RDN25-1	0.212641	0.0264258	0.349648	0.0786427	0.0513738	0.112446	0.0735602	0.743145	0.646813	0.912294	0.789221	0.0512189	0.243645	0.600019	0.731496	0.452183	0.959853	0.721436	0.937942	0.807824	0.989683	0.923494	0.191625	0.00897575	0.118264	0.0483458	0.0294472	0.0763235	0.0416695	0.64174	0.409456	0.685641	0.580699	0.0123043	0.707253	0.880853	0.645242	0.895165	0.296159	0.581275	0.859898	0.957247	0.56358	0.795543	0.00529931	0.894309	0.96522
867	2337	RDN25-1	0.0371997	0.700955	0.93851	0.842156	0.591188	0.861944	0.910227	0.995385	0.941893	0.997721	0.995705	0.0106542	0.80849	0.945055	0.913773	0.166302	0.374107	0.439314	0.980658	0.563417	0.791771	0.821621	0.0925378	0.210275	0.622824	0.349961	0.97716	0.632675	0.575202	0.878741	0.996242	0.942067	0.918356	0.0618215	0.0589417	0.176343	0.307679	0.530041	0.861653	0.733907	0.614424	0.7671	0.951439	0.884729	0.0949974	0.0169876	0.135811
867	2340	RDN25-1	-0.0575533	0.552218	0.903104	0.642848	0.798764	0.497584	0.571287	0.99316	0.984996	0.979865	0.978758	0.00783497	0.858536	0.964207	0.749708	0.535448	0.938561	0.874029	0.939996	0.8617	0.985339	0.968313	0.108269	0.142389	0.532166	0.148367	0.109409	0.220177	0.167385	0.790216	0.611568	0.79846	0.788236	0.022198	0.49804	0.746315	0.478869	0.325649	0.790947	0.568172	0.757557	0.59763	0.915284	0.785459	-0.0300454	0.451206	0.777018
867	2347	RDN25-1	0.0149069	0.87773	0.978903	0.997538	0.990215	0.889465	0.894184	0.999197	0.999839	0.997721	0.995705	0.0967621	0.0273571	0.170835	0.125246	0.172117	0.0533593	0.0517237	0.536943	0.571837	0.340052	0.360556	0.0446926	0.545799	0.848849	0.712094	0.71938	0.578058	0.581679	0.968644	0.931296	0.926946	0.921192	0.0350153	0.285065	0.545733	0.646141	0.686642	0.387256	0.386011	0.860212	0.850374	0.646381	0.647376	0.0135813	0.733481	0.913139
867	2349	RDN25-1	-0.0754365	0.435619	0.864936	0.411696	0.346851	0.55505	0.557461	0.978595	0.892077	0.983595	0.972322	-0.0190723	0.664354	0.882709	0.590112	0.459781	0.9394	0.947635	0.897164	0.81305	0.985339	0.993031	0.0763584	0.301578	0.709395	0.414718	0.56101	0.246041	0.240621	0.905115	0.88379	0.809322	0.839937	0.0533024	0.103531	0.273701	0.329163	0.608497	0.0837924	0.0747921	0.633729	0.81298	0.251952	0.225664	0.0261151	0.512587	0.814895
867	2351	RDN25-1	-0.00210782	0.982645	0.997128	0.798712	0.828828	0.856248	0.746028	0.995385	0.986933	0.997721	0.986029	0.0305879	0.486431	0.796069	0.908992	0.878698	0.775885	0.995523	0.980658	0.971076	0.954334	0.999325	0.13649	0.0639449	0.357008	0.166794	0.180469	0.126387	0.176093	0.799232	0.705579	0.734505	0.788236	-0.0335156	0.306214	0.572781	0.192886	0.302701	0.208472	0.0972628	0.462083	0.573557	0.457697	0.275836	0.021263	0.593949	0.848469
867	2416	RDN25-1	-0.0702658	0.467816	0.876756	0.472484	0.483594	0.503217	0.584708	0.990971	0.920475	0.979865	0.978758	0.0326752	0.45717	0.782872	0.599454	0.654831	0.486864	0.33512	0.903824	0.912705	0.857559	0.778524	0.0951318	0.197716	0.609894	0.265175	0.298726	0.218303	0.161639	0.859284	0.766773	0.79846	0.777997	-0.0246369	0.452025	0.710433	0.513762	0.572622	0.568248	0.798526	0.775873	0.794747	0.791235	0.918384	0.00535317	0.893241	0.964815
867	2417	RDN25-1	0.0607156	0.530554	0.901809	0.626082	0.509966	0.66465	0.549819	0.99316	0.925006	0.995892	0.970502	0.0140493	0.749258	0.918333	0.940743	0.688715	0.960778	0.773492	0.983651	0.920285	0.989779	0.944054	0.11515	0.118573	0.489973	0.195895	0.145677	0.210149	0.141285	0.809453	0.657495	0.795318	0.752226	0.0925016	0.00466555	0.019933	0.0632087	0.0522187	0.0546989	0.016783	0.218093	0.183219	0.183353	0.0718333	-0.0104424	0.793479	0.935151
867	2421	RDN25-1	-0.0353902	0.714858	0.940768	0.476747	0.563806	0.95186	0.80168	0.99193	0.936631	0.998599	0.98932	0.0514066	0.241919	0.598902	0.812503	0.689164	0.105691	0.212882	0.960892	0.920285	0.491304	0.665881	0.076594	0.300084	0.708248	0.641214	0.565982	0.180452	0.27133	0.953659	0.88379	0.789876	0.856568	0.11088	0.000687368	0.00333951	0.102771	0.112645	0.000398026	0.00180938	0.301094	0.309331	0.0026684	0.0105903	0.0269897	0.498563	0.809391
867	2619	RDN25-1	0.0356713	0.712692	0.940638	0.897828	0.370808	0.912622	0.798779	0.995385	0.892843	0.997721	0.98932	-0.000820697	0.985105	0.999449	0.353853	0.324432	0.612004	0.83023	0.785532	0.731086	0.899084	0.959634	0.0943269	0.201554	0.61392	0.576971	0.0724706	0.375451	0.280799	0.947676	0.552037	0.84562	0.856568	0.0657958	0.0443995	0.141717	0.705387	0.0169381	0.296793	0.14813	0.888241	0.0787848	0.563602	0.373596	-0.0609924	0.125893	0.44946
867	2634	RDN25-1	-0.117025	0.225565	0.747264	0.225348	0.287865	0.286326	0.231258	0.920972	0.891056	0.96429	0.933258	-0.0510315	0.245377	0.601392	0.266587	0.428452	0.394809	0.259946	0.707881	0.796419	0.804693	0.713155	-0.110735	0.133466	0.510618	0.142078	0.210504	0.194957	0.142107	0.780108	0.715376	0.790649	0.752226	-0.0322097	0.325454	0.595347	0.35817	0.578217	0.55242	0.346476	0.668183	0.796562	0.78228	0.613158	-0.00266189	0.946794	0.980735
867	2640	RDN25-1	-0.0236098	0.807474	0.957799	0.812072	0.838806	0.348102	0.282643	0.995385	0.991692	0.979865	0.943026	0.135817	0.001909	0.0219747	0.0117693	0.00287207	0.196484	0.30113	0.171288	0.0631858	0.628888	0.744531	0.226853	0.00190147	0.0470935	0.00490455	0.00142325	0.0449973	0.0652763	0.321497	0.120655	0.582526	0.646328	0.148542	5.14273e-06	3.15459e-05	0.000852126	0.000240038	0.0511703	0.100137	0.00601986	0.00248354	0.174191	0.280854	-0.0455745	0.25298	0.628235
867	2724	RDN25-1	-0.050805	0.599831	0.913051	0.486597	0.681813	0.612506	0.532464	0.99193	0.949552	0.995892	0.968555	-0.0301998	0.491982	0.797162	0.335528	0.698478	0.532839	0.382857	0.777591	0.920793	0.878775	0.793782	0.0985636	0.18195	0.590926	0.343931	0.223916	0.215587	0.273588	0.878741	0.723675	0.79846	0.856568	0.0566392	0.0836222	0.229903	0.430524	0.234352	0.159778	0.257448	0.723193	0.494582	0.38629	0.518119	-0.00652442	0.870071	0.959208
867	2729	RDN25-1	0.00891839	0.926667	0.990409	0.900578	0.702577	0.92287	0.976791	0.995385	0.95658	0.997721	0.995705	0.0680012	0.121447	0.42791	0.179595	0.100332	0.16603	0.253065	0.620675	0.445395	0.58909	0.705253	0.0835266	0.258324	0.668962	0.282212	0.180457	0.284465	0.361334	0.867306	0.705579	0.820226	0.890455	0.147921	5.63597e-06	3.43159e-05	0.000584735	0.000645791	0.000157777	0.000413967	0.00430518	0.00575301	0.00114225	0.00279667	-0.0323515	0.417216	0.75803
867	2735	RDN25-1	0.00509392	0.958075	0.99535	0.785212	0.55234	0.686724	0.979137	0.995385	0.935373	0.997721	0.995836	0.0287087	0.513615	0.807179	0.929534	0.506425	0.724473	0.593113	0.982585	0.842332	0.942318	0.891498	-0.0114759	0.876793	0.960846	0.581999	0.351114	0.465319	0.859736	0.948068	0.804471	0.881656	0.966529	0.00159377	0.961204	0.987896	0.47399	0.202569	0.260097	0.982801	0.755395	0.452645	0.517437	0.996123	0.0692285	0.0822748	0.361816
867	2791	RDN25-1	0.0599077	0.536048	0.901809	0.628138	0.627457	0.480094	0.603426	0.99316	0.94725	0.979865	0.978758	-0.0552796	0.208212	0.561711	0.227835	0.00606577	0.386679	0.20452	0.679625	0.0977965	0.798282	0.654021	-0.0219706	0.766586	0.922255	0.699532	0.120923	0.901317	0.712002	0.966226	0.628663	0.985113	0.934636	0.0435146	0.183942	0.408567	0.445101	0.194953	0.160521	0.347802	0.731993	0.445898	0.387372	0.613727	0.111975	0.00486157	0.0599776
867	2793	RDN25-1	-0.0282581	0.770532	0.954043	0.607736	0.92897	0.872792	0.505801	0.99316	0.997597	0.997721	0.968555	0.0349095	0.426971	0.759828	0.856383	0.233604	0.347729	0.926006	0.96959	0.642458	0.770515	0.986443	0.00574723	0.938113	0.980548	0.811831	0.614528	0.82344	0.668088	0.989652	0.899709	0.967816	0.929548	0.05877	0.0726152	0.206025	0.449793	0.0688129	0.074709	0.618397	0.733854	0.219733	0.232454	0.81789	-0.0378845	0.34206	0.709241
867	2815	RDN25-1	0.097442	0.313456	0.806901	0.275186	0.403673	0.422339	0.542606	0.944125	0.903623	0.979865	0.969138	0.0589814	0.179299	0.521742	0.163687	0.398891	0.385624	0.635747	0.602479	0.787765	0.798282	0.901888	0.0155401	0.833708	0.944697	0.700404	0.925817	0.99759	0.79736	0.966226	0.989779	0.999972	0.957672	0.127155	9.75289e-05	0.000520681	0.00124679	0.023561	0.00475454	0.0177201	0.00844477	0.101174	0.0247424	0.0746497	0.00747124	0.851421	0.95329
867	2826	RDN25-1	-0.0301679	0.755495	0.949436	0.709541	0.96378	0.416829	0.237541	0.995385	0.997597	0.979865	0.941224	0.0108979	0.804197	0.942847	0.966074	0.554173	0.401138	0.107389	0.987493	0.869601	0.808094	0.492641	0.0577182	0.435166	0.797218	0.547062	0.337958	0.949511	0.681319	0.946863	0.794099	0.992802	0.930667	0.00330118	0.919746	0.971089	0.90509	0.591015	0.212662	0.0254155	0.965723	0.803095	0.461499	0.0977922	-0.0252622	0.526458	0.823208
867	2843	RDN25-1	-0.0720871	0.45633	0.870707	0.626715	0.578434	0.298908	0.459063	0.99316	0.941893	0.975159	0.9646	-0.0223186	0.611607	0.862811	0.988783	0.867709	0.259522	0.604131	0.994141	0.967482	0.693114	0.891498	0.00852313	0.908331	0.969789	0.712517	0.811581	0.748325	0.945901	0.968644	0.955671	0.964961	0.981274	-0.000541884	0.986805	0.996791	0.636796	0.827335	0.385417	0.92359	0.854263	0.929161	0.646075	0.971289	-0.0121376	0.7609	0.925371
867	2865	RDN25-1	0.0671112	0.48808	0.888513	0.570502	0.452763	0.425335	0.521919	0.99316	0.912316	0.979865	0.968555	-0.0297799	0.498024	0.799265	0.48085	0.795709	0.755094	0.518152	0.848828	0.949255	0.949725	0.86391	0.132514	0.0721596	0.373732	0.125336	0.0893168	0.0622605	0.0952546	0.770638	0.573261	0.648351	0.706124	0.000180447	0.995606	0.998428	0.858201	0.790271	0.716552	0.96263	0.954198	0.910069	0.873828	0.988323	-0.0139582	0.726378	0.910461
867	2870	RDN25-1	0.065923	0.495832	0.890166	0.346623	0.518699	0.567724	0.419891	0.961935	0.929344	0.98872	0.9646	0.0292383	0.505876	0.803736	0.255023	0.589409	0.66489	0.356424	0.700299	0.884619	0.919215	0.787075	0.0949943	0.198368	0.609894	0.1191	0.253202	0.268054	0.156923	0.761127	0.748823	0.815631	0.772356	0.0144682	0.658778	0.858732	0.296766	0.731819	0.863455	0.430912	0.598542	0.882616	0.952628	0.680142	-0.00375057	0.925088	0.975949
867	2880	RDN25-1	-0.0102679	0.915609	0.986639	0.62963	0.931357	0.844498	0.961642	0.99316	0.997597	0.997721	0.995705	0.0103885	0.813177	0.946503	0.582671	0.852797	0.990104	0.603434	0.892823	0.96724	0.994027	0.891498	0.149102	0.0428064	0.286013	0.176889	0.0811166	0.0759008	0.0356011	0.803037	0.569985	0.685641	0.553397	-0.0057664	0.860298	0.950628	0.304536	0.927902	0.695499	0.808765	0.608756	0.971912	0.867475	0.920207	-0.000955899	0.980881	0.992329
867	2921	RDN25-1	0.0708242	0.464277	0.875905	0.862315	0.724135	0.836348	0.586542	0.995385	0.96306	0.997721	0.978758	0.0624915	0.15474	0.482461	0.857062	0.626132	0.798483	0.339251	0.96959	0.896228	0.958216	0.781275	0.0222253	0.76396	0.921451	0.707367	0.903049	0.727137	0.932483	0.968644	0.984139	0.964961	0.978278	0.0216826	0.508074	0.753046	0.483514	0.834606	0.478165	0.874692	0.759425	0.932544	0.726182	0.947522	0.0327749	0.411143	0.756015
867	2922	RDN25-1	0.0708242	0.464277	0.875905	0.612949	0.571648	0.64064	0.711151	0.99316	0.939519	0.995892	0.981825	0.0025408	0.953908	0.990522	0.770076	0.905583	0.677925	0.532681	0.948811	0.977227	0.921828	0.865914	-0.0665993	0.367743	0.758123	0.298125	0.37749	0.255631	0.204171	0.867306	0.822359	0.815631	0.815135	0.0510191	0.1192	0.305559	0.461347	0.437583	0.483552	0.646164	0.743361	0.694206	0.73033	0.833185	0.00979251	0.806067	0.941221
867	2923	RDN25-1	0.0643654	0.506091	0.895499	0.910781	0.261875	0.726759	0.693763	0.995385	0.891056	0.997721	0.981654	0.0489376	0.265308	0.621651	0.943554	0.0834965	0.68514	0.61676	0.983651	0.413237	0.924632	0.895856	0.0438064	0.553799	0.850983	0.912711	0.245405	0.848862	0.804541	0.996787	0.744496	0.967816	0.958447	0.0505448	0.122676	0.311801	0.960629	0.0433089	0.582305	0.499427	0.985769	0.16074	0.802884	0.729163	-0.0567814	0.154258	0.496273
867	2944	RDN25-1	-0.151728	0.115267	0.602415	0.0575893	0.0949775	0.0314149	0.0750106	0.727305	0.751079	0.635065	0.789221	0.0473207	0.281443	0.633246	0.962448	0.746659	0.69483	0.699886	0.987493	0.93594	0.929742	0.919471	0.153953	0.0364134	0.264482	0.176528	0.141019	0.264653	0.107164	0.803037	0.6479	0.815631	0.727639	0.00885597	0.786934	0.917591	0.419215	0.724351	0.14352	0.614927	0.713638	0.876828	0.35921	0.815763	0.0275977	0.488936	0.80425
867	2946	RDN25-1	-0.0926392	0.338016	0.821103	0.177773	0.644204	0.124891	0.179065	0.886505	0.947996	0.912294	0.886277	0.0328606	0.454619	0.780769	0.786699	0.214764	0.534274	0.822317	0.954268	0.617504	0.879321	0.956639	-0.028027	0.704911	0.902985	0.355409	0.86312	0.245461	0.360576	0.878741	0.974316	0.809322	0.890455	0.0896629	0.00610512	0.0252325	0.340118	0.0124389	0.511893	0.236392	0.646088	0.0626236	0.753584	0.495405	-0.0429506	0.281362	0.654948
867	2948	RDN25-1	-0.093877	0.331573	0.821103	0.421893	0.527869	0.1836	0.23341	0.983968	0.929344	0.91644	0.933718	0.0126332	0.773807	0.930023	0.66692	0.528445	0.560086	0.7673	0.920997	0.856198	0.888245	0.942273	0.0509284	0.491168	0.823794	0.451426	0.375064	0.906675	0.762516	0.912525	0.821493	0.985113	0.948645	0.0914397	0.00516361	0.0217506	0.0216948	0.0269612	0.207811	0.0967263	0.0976265	0.112467	0.456628	0.275403	-0.0259023	0.51603	0.816437
867	2959	RDN25-1	0.0356254	0.713046	0.940638	0.790993	0.310013	0.715988	0.748246	0.995385	0.891056	0.997721	0.986153	0.00428897	0.922275	0.981063	0.944374	0.199731	0.907137	0.978401	0.983676	0.601182	0.984292	0.996706	0.0258607	0.726775	0.910612	0.827217	0.248691	0.729182	0.770981	0.989652	0.745893	0.964961	0.952112	0.0865284	0.0081485	0.0327731	0.0771293	0.00248081	0.0261603	0.0309705	0.252109	0.016978	0.105161	0.114152	-0.0739775	0.0632893	0.30931
867	2975	RDN25-1	-0.097443	0.313451	0.806901	0.234682	0.238435	0.456411	0.367805	0.924655	0.891056	0.979865	0.956928	-0.00784427	0.85837	0.964207	0.529304	0.539181	0.781682	0.970807	0.869122	0.864005	0.955239	0.996021	0.0999025	0.176056	0.584184	0.36328	0.415734	0.123422	0.176877	0.883982	0.834248	0.734505	0.788236	0.0155147	0.635826	0.847315	0.813878	0.789638	0.348917	0.578794	0.935594	0.910069	0.611041	0.794313	0.0296904	0.456574	0.782495
876	898	RDN25-1	0.26081	0.00616037	0.177534	0.0421342	0.0435532	0.0141582	0.0727543	0.682845	0.646813	0.483217	0.789221	0.103612	0.0181081	0.126642	0.366042	0.366486	0.0788961	0.688342	0.791767	0.768452	0.420566	0.917676	0.0251411	0.734089	0.913656	0.711414	0.785183	0.911491	0.452634	0.968644	0.948645	0.985189	0.90041	0.181826	2.19202e-08	1.78285e-07	0.003898	0.0110485	2.44094e-05	0.0103171	0.0233347	0.0568208	0.00021241	0.0482443	0.0487321	0.221543	0.596824
876	908	RDN25-1	0.0650164	0.50179	0.893461	0.677204	0.768287	0.867545	0.945081	0.99316	0.97722	0.997721	0.995705	0.0932452	0.033517	0.194033	0.182258	0.324333	0.362169	0.471476	0.623716	0.731086	0.78465	0.837905	0.122887	0.0956274	0.437495	0.212741	0.297726	0.340387	0.405855	0.829626	0.766773	0.836691	0.90041	0.192834	2.82858e-09	2.54572e-08	9.73471e-05	0.00230701	0.000208458	0.000411835	0.000894504	0.0161245	0.00148866	0.00279664	0.0332448	0.404464	0.752831
876	960	RDN25-1	0.144545	0.133722	0.630616	0.335818	0.0929403	0.238717	0.210651	0.961935	0.751079	0.939331	0.921118	0.0522322	0.234431	0.592189	0.897352	0.148449	0.587116	0.487103	0.979022	0.5381	0.899084	0.848709	0.0411394	0.578212	0.85949	0.959206	0.372878	0.8401	0.769433	0.996787	0.820805	0.967816	0.952112	0.0118867	0.716754	0.886922	0.452469	0.367022	0.737393	0.873027	0.736277	0.638341	0.88568	0.947522	-0.036055	0.365895	0.727042
876	966	RDN25-1	0.0939266	0.331316	0.821103	0.561491	0.616494	0.70909	0.62376	0.99316	0.942478	0.997721	0.978758	0.0855475	0.0512161	0.261965	0.200226	0.454813	0.350516	0.235182	0.645354	0.808913	0.773431	0.688262	0.234909	0.00128812	0.0396583	0.299556	0.0214657	0.176057	0.226304	0.867306	0.383754	0.789553	0.837195	-0.00867525	0.791181	0.918628	0.000243942	0.359307	0.00038237	8.31171e-05	0.00196775	0.633444	0.00256999	0.000634976	0.0400383	0.315302	0.684736
876	986	RDN25-1	0.0238602	0.805472	0.957799	0.780659	0.946054	0.809764	0.733185	0.995385	0.997597	0.997721	0.985471	-0.0361312	0.41096	0.75039	0.564279	0.388747	0.477608	0.607073	0.886189	0.779274	0.852658	0.892144	0.169692	0.020933	0.191006	0.0306784	0.074093	0.0296544	0.0206095	0.571793	0.55953	0.499562	0.480481	-0.0173728	0.595927	0.82202	0.783359	0.523409	0.674965	0.86656	0.926784	0.763229	0.851974	0.94696	0.0165482	0.678223	0.886919
876	990	RDN25-1	0.0665444	0.49177	0.889035	0.269004	0.705575	0.381858	0.543899	0.944125	0.957774	0.979865	0.969138	-0.148704	0.000669565	0.00967345	0.0595741	0.00407527	0.0108089	0.00166788	0.403507	0.0748939	0.141322	0.0461389	-0.0736798	0.318902	0.723958	0.756222	0.250436	0.518271	0.317615	0.984844	0.74622	0.895638	0.864274	0.00269353	0.934481	0.97807	0.250585	0.663864	0.522426	0.955959	0.540672	0.841863	0.759787	0.986748	0.0257923	0.517815	0.816939
876	1004	RDN25-1	-0.0497369	0.607532	0.915885	0.423186	0.708471	0.4152	0.329932	0.983968	0.959903	0.979865	0.945735	-0.0559401	0.20282	0.55443	0.0957329	0.445522	0.0728569	0.0320992	0.489467	0.803498	0.405652	0.27432	0.201077	0.00606041	0.0951338	0.0370996	0.0138958	0.0312889	0.0497465	0.607304	0.314501	0.51392	0.596958	-0.0185326	0.571616	0.805004	0.241425	0.862902	0.190229	0.0801073	0.530057	0.94497	0.431915	0.238687	-0.00935396	0.814591	0.942607
876	1042	RDN25-1	-0.0173018	0.858278	0.970458	0.473179	0.764146	0.4181	0.384307	0.991638	0.97722	0.979865	0.963664	0.0745176	0.0895959	0.356436	0.748309	0.330294	0.853076	0.945433	0.939996	0.733118	0.965496	0.992648	0.132596	0.0719823	0.373732	0.352085	0.172472	0.390406	0.430134	0.878741	0.69934	0.850737	0.90041	0.00698147	0.831264	0.934534	0.257546	0.878126	0.140972	0.0977536	0.551165	0.950459	0.355882	0.27653	0.0151329	0.704388	0.90072
876	1052	RDN25-1	0.0133492	0.890423	0.980318	0.842021	0.437119	0.77465	0.732878	0.995385	0.911332	0.997721	0.985471	-0.0426414	0.33181	0.681842	0.153568	0.0220078	0.0873338	0.0650077	0.584323	0.210964	0.446524	0.394508	0.0575923	0.43617	0.797218	0.773032	0.646892	0.849082	0.903408	0.989252	0.910126	0.967816	0.97412	-0.0403717	0.2177	0.459043	0.0942938	0.00956777	0.0365492	0.0226823	0.284706	0.050899	0.13605	0.0901803	0.0970528	0.0147335	0.125655
876	1056	RDN25-1	0.0532702	0.582226	0.908771	0.762815	0.922943	0.866018	0.911429	0.995385	0.997597	0.997721	0.995705	0.0530909	0.226818	0.583352	0.56137	0.86651	0.732351	0.82073	0.886123	0.967482	0.942998	0.95598	0.0169301	0.819078	0.938079	0.95154	0.764792	0.808749	0.750153	0.996787	0.944046	0.965422	0.945617	0.0519914	0.112314	0.291539	0.498403	0.862986	0.687739	0.795905	0.767528	0.94497	0.859837	0.918384	0.0428373	0.282634	0.655171
876	1110	RDN25-1	-0.206188	0.0314748	0.375155	0.518781	0.0494347	0.370148	0.355435	0.99193	0.646813	0.979865	0.954535	-0.150597	0.000569902	0.00838061	0.856116	0.0112494	0.493871	0.45605	0.96959	0.13945	0.860672	0.827311	-0.0876219	0.235626	0.647312	0.507254	0.293332	0.706635	0.729284	0.93466	0.766773	0.964131	0.937971	-0.0571648	0.0807889	0.223067	0.0569304	0.255454	0.128093	0.13629	0.202728	0.523253	0.331653	0.352833	0.00323142	0.935433	0.977575
876	1124	RDN25-1	0.0875928	0.365097	0.827359	0.620491	0.902539	0.454294	0.873701	0.99316	0.997597	0.979865	0.995705	-0.035048	0.425138	0.759027	0.184954	0.0259927	0.351831	0.0300948	0.627174	0.226553	0.774705	0.2654	0.125724	0.0881536	0.41721	0.269664	0.770036	0.146058	0.486538	0.864468	0.947017	0.755785	0.90041	0.0230132	0.482388	0.734995	0.766226	0.142136	0.769246	0.210663	0.917493	0.368679	0.90451	0.461849	0.100714	0.0113632	0.109446
876	1133	RDN25-1	0.230178	0.0160468	0.283865	0.0785292	0.115303	0.0961593	0.0882649	0.743145	0.77498	0.895656	0.789302	0.117635	0.00724513	0.0648518	0.212942	0.376621	0.280904	0.243371	0.66148	0.772729	0.714454	0.697468	0.19293	0.00851047	0.114422	0.0774074	0.129932	0.0978779	0.087249	0.682726	0.633865	0.718301	0.69463	0.234606	3.81799e-13	6.10508e-12	2.44667e-05	0.00100043	1.08285e-05	4.42974e-06	0.000260317	0.00816502	0.000101997	4.36006e-05	0.0640374	0.108041	0.41775
876	1437	RDN25-1	0.092056	0.341079	0.821103	0.817333	0.708604	0.939814	0.867149	0.995385	0.959903	0.997721	0.995705	0.018537	0.673224	0.883521	0.35533	0.585166	0.102268	0.0648883	0.786448	0.882211	0.486389	0.394508	0.320021	8.97111e-06	0.00067161	0.00125669	0.00124763	0.00341822	0.00473049	0.2187	0.113061	0.332707	0.322156	0.178176	4.20664e-08	3.2604e-07	0.0120156	0.0159039	0.0436869	0.0685086	0.0609595	0.0747684	0.15709	0.211813	0.0518665	0.193203	0.556788
876	1449	RDN25-1	0.0775115	0.423062	0.854855	0.909575	0.713262	0.747006	0.832082	0.995385	0.961719	0.997721	0.994181	0.0406879	0.354458	0.699152	0.364514	0.963846	0.160973	0.233981	0.791767	0.991533	0.581896	0.686106	0.0384364	0.603454	0.870678	0.531951	0.995247	0.361746	0.439767	0.93919	0.997698	0.836691	0.90041	0.16775	2.51752e-07	1.80669e-06	0.0728931	0.0134436	0.139018	0.071109	0.242178	0.0655471	0.352303	0.217549	0.0379208	0.341598	0.709241
876	1450	RDN25-1	0.000988053	0.991864	0.997128	0.777698	0.673642	0.655614	0.7434	0.995385	0.948917	0.995892	0.986029	-0.00395684	0.928277	0.984464	0.523221	0.409046	0.311207	0.436481	0.867048	0.789996	0.746276	0.820329	0.0716783	0.332261	0.733066	0.612041	0.770518	0.749636	0.633926	0.952173	0.947017	0.964961	0.929523	0.170072	1.70603e-07	1.24328e-06	0.00150007	0.0185048	0.00161142	0.000402643	0.010031	0.0834147	0.00934837	0.00274131	0.0464858	0.243605	0.618342
876	1888	RDN25-1	0.0115677	0.904973	0.984468	0.803551	0.958135	0.670756	0.881807	0.995385	0.997597	0.995892	0.995705	0.0473325	0.281322	0.633246	0.251404	0.497549	0.8784	0.300436	0.698405	0.835572	0.976138	0.744531	0.00408449	0.955996	0.988087	0.821532	0.983353	0.519942	0.922499	0.989652	0.996242	0.895819	0.977711	0.229039	1.39273e-12	1.97743e-11	2.71528e-08	1.9107e-05	7.1669e-06	1.08772e-09	7.43309e-07	0.000322119	7.00171e-05	2.34305e-08	0.00589292	0.882551	0.962316
876	2129	RDN25-1	0.191574	0.0459822	0.442855	0.346549	0.084649	0.0947347	0.331256	0.961935	0.736087	0.889153	0.945735	-0.0109213	0.803785	0.942847	0.0469771	0.762527	0.493059	0.0312549	0.372978	0.939485	0.859937	0.27198	0.0949537	0.198561	0.609894	0.993082	0.311673	0.363027	0.997887	0.997637	0.774768	0.836691	0.999998	0.0193569	0.554629	0.792779	0.0854094	0.824255	0.921632	0.0513564	0.267847	0.928818	0.973482	0.170625	0.00755264	0.849821	0.952628
876	2133	RDN25-1	0.0192586	0.842446	0.965895	0.798756	0.753093	0.898017	0.921143	0.995385	0.974461	0.997721	0.995705	0.0601022	0.171162	0.509009	0.789471	0.220427	0.576977	0.530811	0.954268	0.622156	0.894991	0.865914	-0.0787755	0.286488	0.695937	0.126587	0.458916	0.159576	0.16887	0.771531	0.853015	0.778329	0.788236	-0.0293307	0.370583	0.636927	0.0914496	0.783718	0.120135	0.130797	0.278618	0.906292	0.319066	0.344079	-0.0147456	0.711612	0.904493
876	2142	RDN25-1	0.0724312	0.454177	0.870307	0.654542	0.898663	0.620673	0.596026	0.99316	0.997597	0.995892	0.978758	0.0437347	0.319551	0.670567	0.740741	0.486329	0.662561	0.608643	0.938605	0.831719	0.918274	0.892144	0.0465718	0.529026	0.846152	0.800423	0.646746	0.75582	0.721717	0.989652	0.910126	0.964961	0.936623	-0.00327172	0.92046	0.97117	0.511458	0.0919309	0.524374	0.573758	0.775873	0.270679	0.760699	0.790271	0.0861124	0.0305527	0.195799
876	2191	RDN25-1	-0.0800399	0.408047	0.850163	0.637123	0.697271	0.439725	0.524538	0.99316	0.953894	0.979865	0.968555	-0.0174835	0.69081	0.891947	0.800377	0.735303	0.745163	0.966337	0.957797	0.930859	0.945949	0.995946	0.0117954	0.873391	0.960034	0.599466	0.564393	0.868796	0.729587	0.952173	0.88379	0.974892	0.937971	-0.0481035	0.141835	0.344038	0.701739	0.851024	0.237743	0.399341	0.886621	0.938061	0.492207	0.656738	-0.0381372	0.338848	0.70673
876	2197	RDN25-1	-0.0096897	0.920345	0.987982	0.680198	0.967473	0.751496	0.994587	0.99316	0.997597	0.997721	0.997499	-0.0682297	0.120198	0.426504	0.770097	0.3024	0.0680694	0.227745	0.948811	0.716078	0.3872	0.677514	-0.102953	0.163159	0.569933	0.534638	0.258002	0.111363	0.230742	0.93919	0.753944	0.729436	0.839154	-0.00549973	0.866697	0.953222	0.289996	0.996724	0.47805	0.928204	0.588501	0.998823	0.726182	0.972799	-0.00528143	0.894663	0.965287
876	2220	RDN25-1	0.0160488	0.868446	0.974671	0.947805	0.847938	0.858799	0.876584	0.996965	0.991692	0.997721	0.995705	0.0359809	0.412911	0.751207	0.618853	0.989771	0.444656	0.933065	0.913678	0.999856	0.829386	0.989946	0.0233785	0.752101	0.919133	0.862433	0.877155	0.747182	0.914175	0.989652	0.977178	0.964961	0.976414	0.235625	3.00174e-13	4.84693e-12	2.14999e-07	0.000130752	1.04028e-09	8.19594e-08	4.45921e-06	0.00149398	2.87774e-08	1.20329e-06	0.0367637	0.356542	0.719793
876	2256	RDN25-1	0.0828475	0.391746	0.842934	0.447735	0.309796	0.517394	0.635846	0.983998	0.891056	0.979865	0.981654	0.0222715	0.61236	0.862811	0.733797	0.422507	0.914197	0.798731	0.937942	0.793956	0.985339	0.949267	-0.0159131	0.829776	0.942837	0.807522	0.900376	0.678349	0.519165	0.989652	0.984139	0.957881	0.905631	0.0804602	0.0139064	0.0526526	0.0851418	0.04337	0.108367	0.238121	0.267327	0.16074	0.298709	0.497048	-0.0267582	0.502255	0.810993
876	2258	RDN25-1	-0.0459648	0.635068	0.924171	0.470519	0.55168	0.517853	0.600664	0.98922	0.935373	0.979865	0.978758	0.0406007	0.355491	0.699514	0.831118	0.715702	0.680218	0.498242	0.964743	0.927107	0.92331	0.855245	0.0439594	0.552413	0.850983	0.855811	0.767426	0.762418	0.641154	0.989652	0.945964	0.96542	0.929523	0.0675186	0.0391074	0.128179	0.387565	0.354092	0.230913	0.120411	0.687655	0.629058	0.482768	0.322899	0.018353	0.645412	0.871306
876	2260	RDN25-1	-0.0330838	0.732715	0.945193	0.700962	0.544435	0.404981	0.484606	0.995385	0.933691	0.979865	0.968555	-0.0305353	0.487182	0.796069	0.486484	0.302994	0.0979891	0.163043	0.852888	0.716078	0.476618	0.591004	0.0146679	0.842918	0.948606	0.924146	0.837613	0.637259	0.76615	0.996787	0.96232	0.943986	0.950612	-0.0556434	0.0892096	0.241261	0.159776	0.0973685	0.00667293	0.0157504	0.408851	0.280883	0.0335948	0.0679672	0.0324209	0.416217	0.757816
876	2264	RDN25-1	-0.0243307	0.801714	0.957799	0.498318	0.684169	0.484347	0.374292	0.99193	0.949814	0.979865	0.961525	0.0467689	0.287097	0.637692	0.990728	0.656867	0.995101	0.69429	0.994289	0.912705	0.996109	0.917676	0.0314499	0.670858	0.891616	0.85697	0.891537	0.843227	0.659484	0.989652	0.981549	0.967816	0.929523	-0.0319594	0.32923	0.598001	0.0792358	0.331649	0.04635	0.011531	0.254874	0.604419	0.16372	0.0528855	0.0196392	0.622437	0.857135
876	2266	RDN25-1	0.0173275	0.858069	0.970458	0.796998	0.766203	0.789785	0.786268	0.995385	0.97722	0.997721	0.98932	-0.00226835	0.958846	0.99218	0.38858	0.397382	0.347716	0.870574	0.805643	0.787234	0.770515	0.967387	0.0428349	0.562634	0.855417	0.987737	0.939169	0.982824	0.499505	0.996787	0.992276	0.999725	0.901827	0.0200323	0.540897	0.780535	0.588617	0.579742	0.536604	0.434999	0.824339	0.796562	0.772094	0.682505	0.0494351	0.214942	0.590172
876	2278	RDN25-1	0.103791	0.282814	0.7975	0.759425	0.282677	0.648998	0.457269	0.995385	0.891056	0.995892	0.9646	0.0528414	0.229011	0.585684	0.718593	0.288687	0.923717	0.619584	0.935933	0.69859	0.985339	0.896772	0.0651069	0.378598	0.765803	0.930935	0.373213	0.924158	0.640713	0.996787	0.820805	0.988048	0.929523	0.0343714	0.294021	0.558499	0.394766	0.383152	0.557533	0.878929	0.692023	0.654696	0.785361	0.949764	-0.0119794	0.763922	0.925813
876	2280	RDN25-1	0.166715	0.0831594	0.537112	0.365916	0.132872	0.62811	0.644063	0.966093	0.786605	0.995892	0.981654	0.0803624	0.067086	0.305645	0.905265	0.221631	0.442954	0.408028	0.979565	0.623605	0.829386	0.803218	0.200489	0.00621336	0.0953999	0.11386	0.0227313	0.285902	0.297424	0.759449	0.385661	0.820226	0.863281	0.177613	4.6461e-08	3.59255e-07	0.0179414	0.00108555	0.126115	0.133449	0.0843468	0.00875103	0.327955	0.349306	0.00580973	0.884197	0.962316
876	2281	RDN25-1	0.209948	0.0284424	0.364788	0.0890463	0.110065	0.333975	0.383886	0.757209	0.76667	0.979865	0.963664	0.143803	0.00100748	0.0134904	0.0432042	0.0876001	0.542261	0.678949	0.358566	0.420478	0.879805	0.916896	0.244107	0.000812485	0.0270336	0.00906528	0.0160082	0.0886463	0.113114	0.39676	0.328669	0.703751	0.736249	0.218106	1.60603e-11	1.98137e-10	3.05975e-05	0.000649212	0.00689366	0.0123031	0.000319088	0.00576395	0.0344154	0.056133	0.0403446	0.311611	0.682118
876	2288	RDN25-1	0.114346	0.236438	0.75328	0.720941	0.342852	0.737408	0.875458	0.995385	0.892077	0.997721	0.995705	0.142664	0.0011059	0.0143986	0.219954	0.0316981	0.206174	0.362947	0.668873	0.253199	0.637442	0.787075	0.26918	0.000211344	0.00994525	0.0151511	0.00234814	0.0135409	0.0244383	0.508902	0.162145	0.387071	0.494333	0.218991	1.32396e-11	1.65823e-10	0.00113269	7.63583e-05	0.00034714	0.00144596	0.00775186	0.00095557	0.00235813	0.008656	0.0123004	0.757792	0.924976
876	2314	RDN25-1	0.0638216	0.509698	0.896394	0.386948	0.562585	0.9673	0.800714	0.975792	0.936631	0.999401	0.98932	-0.0514081	0.241905	0.598902	0.638576	0.38813	0.0165278	0.00413625	0.917777	0.779274	0.181736	0.0829777	0.0971583	0.18829	0.598119	0.129965	0.267258	0.710519	0.920521	0.773946	0.760164	0.964396	0.977711	0.000780744	0.980989	0.99427	0.544763	0.99203	0.0899166	0.0221762	0.800767	0.997063	0.262849	0.0885844	0.0013118	0.973765	0.991218
876	2337	RDN25-1	0.229672	0.0162873	0.283865	0.189863	0.0212033	0.150367	0.0848539	0.903915	0.484542	0.912294	0.789302	0.113132	0.009826	0.0813237	0.761997	0.0350107	0.592294	0.261383	0.947055	0.267381	0.899084	0.713165	0.171965	0.0192533	0.181747	0.349693	0.0292351	0.272768	0.142831	0.878741	0.409456	0.815631	0.752226	0.230208	1.06432e-12	1.56512e-11	0.00207852	2.64595e-06	0.000202544	5.81897e-06	0.0134043	6.3214e-05	0.00145037	5.56082e-05	-0.0152793	0.701665	0.899859
876	2340	RDN25-1	-0.0826839	0.392685	0.843013	0.0951268	0.153451	0.108032	0.19864	0.762674	0.811405	0.912294	0.909249	0.00112159	0.979644	0.999169	0.0950753	0.250037	0.107865	0.340363	0.489176	0.656669	0.493383	0.781463	0.146747	0.0462336	0.29842	0.485984	0.378274	0.400662	0.204816	0.924568	0.822359	0.853057	0.815135	0.0194073	0.5536	0.792779	0.108251	0.327658	0.118889	0.461233	0.312075	0.599225	0.317783	0.704885	0.0713279	0.0733792	0.336645
876	2347	RDN25-1	-0.0196	0.83969	0.965505	0.635327	0.806776	0.814469	0.677669	0.99316	0.986201	0.997721	0.981654	-0.00989042	0.82198	0.947375	0.460852	0.78436	0.774906	0.507346	0.843333	0.947639	0.954334	0.860037	0.0534247	0.470144	0.815793	0.771702	0.590529	0.534886	0.695986	0.989252	0.887706	0.903975	0.932143	0.142737	1.1931e-05	6.99298e-05	0.0105003	0.0100349	0.000447322	0.00183642	0.0543206	0.0526379	0.00298366	0.0107009	0.00683982	0.86385	0.957121
876	2349	RDN25-1	0.0113338	0.906886	0.984809	0.941514	0.842388	0.862795	0.830839	0.995608	0.991692	0.997721	0.994181	0.0385504	0.380327	0.719998	0.516815	0.425425	0.368076	0.911281	0.867048	0.796419	0.787893	0.982299	0.0179258	0.808638	0.935099	0.861626	0.745865	0.759262	0.847246	0.989652	0.93968	0.964961	0.966529	0.137927	2.33856e-05	0.000133736	0.00240833	0.00507638	0.000255949	0.00648345	0.0153619	0.0303199	0.00179849	0.0324543	-0.0101621	0.798901	0.937408
876	2351	RDN25-1	0.183504	0.0561332	0.465421	0.494494	0.0752558	0.445379	0.481646	0.99193	0.718069	0.979865	0.967897	-0.0535736	0.222616	0.577399	0.00178148	0.442907	0.00122287	0.000658109	0.0487679	0.803498	0.033476	0.0227567	0.082386	0.264905	0.677936	0.69614	0.302941	0.751387	0.690114	0.965611	0.766773	0.964961	0.932074	0.0147621	0.652298	0.855363	0.0251439	0.686257	0.0192929	0.0106498	0.109764	0.850298	0.0816455	0.0495269	-0.00671196	0.866371	0.958924
876	2416	RDN25-1	0.157206	0.102568	0.570709	0.0395538	0.404463	0.271694	0.123175	0.682845	0.904199	0.960613	0.838923	0.0173047	0.693811	0.893089	0.174019	0.403417	0.561996	0.748571	0.618838	0.788824	0.888245	0.937563	0.0411799	0.577837	0.859332	0.234739	0.753754	0.949373	0.614271	0.836055	0.940186	0.992802	0.929523	0.103593	0.00152305	0.00703636	0.000332185	0.503402	0.145786	0.00835447	0.00259045	0.750818	0.363919	0.0403595	0.0682852	0.0865462	0.37093
876	2417	RDN25-1	-0.0738407	0.445419	0.868663	0.18766	0.358633	0.359028	0.248688	0.898306	0.892843	0.979865	0.943026	0.0248007	0.572571	0.844041	0.475142	0.99398	0.918932	0.704056	0.848828	0.999856	0.985339	0.920765	-0.0597922	0.418818	0.790194	0.131719	0.325994	0.314475	0.189094	0.773946	0.783765	0.832328	0.795101	0.219443	1.19911e-11	1.51335e-10	0.000330687	0.000198749	3.0132e-07	3.76496e-06	0.00258645	0.00213189	4.08934e-06	3.84993e-05	0.0252618	0.526465	0.823208
876	2421	RDN25-1	-0.0197226	0.8387	0.965297	0.554995	0.672796	0.966062	0.817668	0.99316	0.948917	0.999401	0.993411	0.000337647	0.993872	0.999449	0.441496	0.675506	0.752674	0.944671	0.832851	0.920051	0.949519	0.992555	-0.0343955	0.642078	0.881619	0.351035	0.486309	0.80994	0.627761	0.878741	0.864111	0.965422	0.929523	0.250319	8.24216e-15	1.75159e-13	1.53633e-06	1.54024e-05	8.4666e-12	8.65442e-11	2.33598e-05	0.00027237	4.19816e-10	2.52709e-09	0.0259256	0.515653	0.816437
876	2619	RDN25-1	0.0144666	0.881315	0.979439	0.789478	0.99678	0.567227	0.892932	0.995385	0.999839	0.98872	0.995705	0.11473	0.00882912	0.0753449	0.0168528	0.0978646	0.396153	0.0767578	0.210901	0.440391	0.804693	0.422007	0.186892	0.0108572	0.129578	0.0131669	0.0433768	0.141982	0.0408587	0.462254	0.484498	0.752214	0.580699	0.0679362	0.0379082	0.12487	0.0676047	0.309678	0.902201	0.304636	0.22895	0.579695	0.964588	0.577622	0.0140305	0.725018	0.909448
876	2634	RDN25-1	0.229773	0.0162391	0.283865	0.0137525	0.0527251	0.02818	0.0317773	0.425196	0.646813	0.602089	0.632657	-0.0504155	0.251128	0.607799	0.6046	0.220065	0.227526	0.181336	0.9069	0.621928	0.658904	0.617517	0.0842687	0.254103	0.664748	0.18979	0.489155	0.344881	0.379443	0.809453	0.866239	0.836691	0.890455	-0.0901374	0.00583969	0.0242266	0.127935	0.0306719	0.0116692	0.00650608	0.351319	0.122501	0.0541813	0.0325057	0.0245169	0.538733	0.826801
876	2640	RDN25-1	0.235996	0.0134939	0.261735	0.222893	0.274134	0.59233	0.283387	0.920972	0.891056	0.995738	0.943026	0.108037	0.0137047	0.104498	0.923844	0.820918	0.120851	0.642592	0.982585	0.958846	0.52253	0.90393	0.263326	0.000292931	0.0126962	0.0559631	0.0890533	0.289273	0.0786784	0.647478	0.573261	0.820226	0.681691	0.246112	2.36395e-14	4.66278e-13	0.00198898	0.0152722	0.0992098	0.00200598	0.0129382	0.0725775	0.282045	0.0115608	0.121694	0.00219679	0.0352645
876	2724	RDN25-1	-0.0368449	0.703673	0.938813	0.800223	0.658119	0.664682	0.399472	0.995385	0.948823	0.995892	0.9646	0.00683519	0.876433	0.968117	0.747146	0.945972	0.990623	0.392074	0.939954	0.989798	0.994027	0.797288	0.0839747	0.25577	0.666199	0.246256	0.398392	0.332065	0.654369	0.851795	0.834248	0.836691	0.929523	0.199286	8.04529e-10	7.95832e-09	1.81935e-06	0.000327121	9.50655e-07	8.11836e-05	2.6711e-05	0.00325634	1.14862e-05	0.000623832	0.0109781	0.78314	0.934567
876	2729	RDN25-1	0.114554	0.235582	0.752218	0.552205	0.340423	0.411214	0.363668	0.99193	0.892077	0.979865	0.954535	-0.00946094	0.829589	0.950134	0.244455	0.725649	0.415985	0.515156	0.695001	0.928887	0.815866	0.861763	0.203034	0.00557531	0.0917681	0.0614205	0.0252754	0.0271803	0.0198298	0.647478	0.392978	0.489246	0.480481	0.267684	8.63657e-17	2.56296e-15	6.75741e-07	8.01025e-07	8.88347e-10	8.94021e-11	1.13479e-05	2.28815e-05	2.56547e-08	2.58186e-09	0.0119937	0.76365	0.925813
876	2735	RDN25-1	-0.0889652	0.357603	0.821103	0.434245	0.453169	0.159855	0.360377	0.983998	0.912316	0.914659	0.954535	-0.00103813	0.981159	0.999169	0.900367	0.908013	0.266378	0.919409	0.979103	0.977227	0.69933	0.985001	0.136737	0.0634621	0.354913	0.0750364	0.0927513	0.293022	0.0894491	0.678331	0.577608	0.820226	0.69548	0.0244814	0.454885	0.712065	0.468743	0.539887	0.451186	0.596761	0.750059	0.7732	0.704526	0.803267	-0.00810251	0.839032	0.947836
876	2791	RDN25-1	0.0981317	0.310027	0.806657	0.357552	0.374244	0.303652	0.317957	0.965316	0.896112	0.975159	0.943026	-0.0162311	0.711934	0.901223	0.725724	0.760725	0.847461	0.791812	0.937082	0.938585	0.96464	0.946716	0.0645756	0.38251	0.770634	0.447517	0.472413	0.367522	0.388181	0.912525	0.855561	0.836691	0.890455	0.168372	2.26952e-07	1.63584e-06	0.000170918	0.00161846	8.59936e-06	8.1698e-06	0.00142143	0.0121523	8.27806e-05	7.55994e-05	0.00238657	0.95229	0.982405
876	2793	RDN25-1	0.176992	0.0656046	0.503151	0.0394658	0.0775995	0.0926496	0.124313	0.682845	0.718069	0.88126	0.839829	0.0418674	0.340669	0.687179	0.14992	0.378823	0.485201	0.691466	0.581966	0.772729	0.856352	0.917676	0.0344372	0.641674	0.881432	0.391196	0.592672	0.729432	0.877989	0.898992	0.887706	0.964961	0.970571	0.133073	4.51101e-05	0.000248899	0.000141606	0.00610443	0.00140313	0.00409224	0.00121615	0.0349509	0.00835174	0.0216823	-0.0119155	0.765146	0.926434
876	2815	RDN25-1	-0.0120673	0.900889	0.983484	0.972482	0.544653	0.682537	0.495809	0.996965	0.933691	0.997721	0.968555	-0.0406012	0.355485	0.699514	0.642632	0.123994	0.158433	0.046551	0.917777	0.49001	0.577074	0.337014	0.198138	0.00686012	0.0999878	0.00803213	0.0890737	0.0306166	0.0682427	0.370339	0.573261	0.512352	0.646328	0.201178	5.51952e-10	5.62889e-09	8.12005e-07	0.00463304	1.13575e-05	0.000158992	1.31725e-05	0.0283814	0.000106599	0.00115423	0.0533738	0.180561	0.537431
876	2826	RDN25-1	0.184753	0.0544504	0.464142	0.304297	0.0446528	0.548628	0.463408	0.952625	0.646813	0.983595	0.9646	0.0213167	0.627689	0.872293	0.275986	0.39964	0.0365016	0.0645963	0.720867	0.78848	0.299142	0.394508	0.0378453	0.609039	0.871603	0.606476	0.432438	0.267407	0.344687	0.952173	0.839325	0.815631	0.885001	0.0325531	0.32032	0.589131	0.287462	0.237946	0.019063	0.0402337	0.586702	0.49906	0.080933	0.142307	-0.0301675	0.449368	0.775796
876	2843	RDN25-1	0.0956617	0.322421	0.814031	0.453239	0.272916	0.758416	0.551304	0.983998	0.891056	0.997721	0.971064	-1.81206e-05	0.999671	0.999877	0.739764	0.712184	0.19556	0.473007	0.938192	0.927107	0.62751	0.838189	0.0201665	0.785266	0.929474	0.977359	0.621896	0.575024	0.847712	0.996787	0.90345	0.926946	0.966529	-0.0727546	0.0261852	0.0917596	0.0415669	0.344001	0.000536472	0.00535009	0.161594	0.617264	0.00351583	0.0274075	-0.0225706	0.571452	0.840794
876	2865	RDN25-1	0.0561623	0.561881	0.903857	0.768594	0.641816	0.47353	0.59339	0.995385	0.947996	0.979865	0.978758	0.0492552	0.262216	0.617904	0.659396	0.478186	0.183744	0.334822	0.917777	0.824048	0.613569	0.778524	0.14103	0.0555193	0.332684	0.154055	0.116501	0.0445234	0.0749987	0.790216	0.628663	0.581429	0.681691	-0.0484447	0.139027	0.338975	0.0962199	0.306058	0.427754	0.194969	0.288002	0.575749	0.686287	0.442649	0.00593258	0.881766	0.962316
876	2870	RDN25-1	0.170712	0.075932	0.53104	0.10929	0.0826948	0.472012	0.187824	0.80004	0.730096	0.979865	0.899092	0.0910812	0.0378672	0.210732	0.111188	0.0814318	0.879041	0.28085	0.516756	0.410275	0.976138	0.729099	-0.113715	0.123265	0.496101	0.142189	0.253312	0.00707028	0.0526711	0.780108	0.748823	0.352443	0.600745	-0.0797731	0.0147442	0.0555056	0.0545897	0.223302	6.60394e-06	0.00233304	0.198055	0.481585	6.50006e-05	0.0130452	-0.0151985	0.703169	0.899859
876	2880	RDN25-1	0.0270947	0.779733	0.954043	0.836889	0.561225	0.925788	0.912981	0.995385	0.936444	0.997721	0.995705	0.010284	0.815022	0.947375	0.931541	0.451855	0.597506	0.907935	0.982585	0.807824	0.899084	0.979496	0.0457721	0.536132	0.848386	0.623019	0.346947	0.907573	0.704659	0.952173	0.804107	0.985113	0.932143	0.00371295	0.909776	0.96671	0.965071	0.458334	0.407142	0.752239	0.986844	0.713716	0.666233	0.896669	-0.0356982	0.370661	0.733307
876	2921	RDN25-1	0.0922505	0.340055	0.821103	0.728986	0.812283	0.89884	0.610253	0.995385	0.986331	0.997721	0.978758	0.0291095	0.507752	0.80418	0.61163	0.537259	0.312153	0.815307	0.910171	0.862503	0.746276	0.954503	-0.0967988	0.189938	0.598142	0.0600775	0.0585551	0.0256029	0.0801532	0.647478	0.53998	0.484222	0.681691	0.0908652	0.00545266	0.0227932	0.436012	0.647928	0.770295	0.193423	0.726718	0.835064	0.904933	0.440879	0.06674	0.0939279	0.38918
876	2922	RDN25-1	0.0922505	0.340055	0.821103	0.968303	0.961291	0.960883	0.441904	0.996965	0.997597	0.999401	0.9646	-0.0109352	0.80354	0.942847	0.0648926	0.108237	0.0484101	0.609288	0.414933	0.463029	0.326209	0.892144	-0.0555844	0.45236	0.803274	0.0777905	0.099181	0.0704478	0.374802	0.682726	0.592381	0.678334	0.890455	0.0556817	0.0889895	0.240864	0.46357	0.553172	0.423597	0.284882	0.744298	0.782323	0.682534	0.552642	0.0870458	0.0287878	0.189654
876	2923	RDN25-1	0.120691	0.211262	0.732335	0.589536	0.124632	0.617095	0.236401	0.99316	0.779028	0.995892	0.941209	-0.0225884	0.607307	0.862811	0.103091	0.717244	0.0627969	0.635716	0.504892	0.927107	0.374218	0.901888	-0.0448746	0.544163	0.848849	0.177933	0.998429	0.145748	0.562184	0.804437	0.998429	0.755785	0.916251	0.0407537	0.213374	0.451996	0.584849	0.107745	0.458476	0.302237	0.823677	0.299541	0.710216	0.573902	-0.0447042	0.262164	0.63779
876	2944	RDN25-1	0.0865226	0.371007	0.830733	0.437485	0.418433	0.763545	0.923497	0.983998	0.908276	0.997721	0.995705	0.0600948	0.171215	0.509009	0.312973	0.319183	0.933508	0.459944	0.756663	0.731086	0.985339	0.830852	0.178162	0.0152541	0.157514	0.032903	0.0369543	0.116867	0.288322	0.578173	0.462456	0.731253	0.86051	-0.0319582	0.329248	0.598001	0.395234	0.556898	0.0266713	0.000938278	0.692023	0.783977	0.106848	0.00587094	-0.000737351	0.985252	0.994612
876	2946	RDN25-1	-0.00438953	0.963868	0.99535	0.759502	0.554893	0.808435	0.844785	0.995385	0.935373	0.997721	0.995705	-0.107565	0.0141249	0.106959	0.0117972	0.515502	0.0100611	0.0120363	0.171288	0.848288	0.135493	0.158194	-0.0193333	0.793936	0.930685	0.566356	0.572722	0.615735	0.657603	0.94709	0.887706	0.939224	0.929523	0.193341	2.56666e-09	2.32268e-08	0.000156686	6.82567e-07	9.89824e-06	3.45951e-06	0.00132402	1.97119e-05	9.35704e-05	3.60777e-05	-0.0681172	0.0873253	0.37093
876	2948	RDN25-1	0.0550298	0.569807	0.906737	0.780626	0.338733	0.908752	0.658552	0.995385	0.892077	0.997721	0.981654	-0.0889739	0.0425543	0.227555	0.032107	0.503852	0.00176014	0.0435456	0.302269	0.839233	0.0432303	0.32327	0.0149546	0.839887	0.947462	0.891605	0.465208	0.512389	0.950647	0.993093	0.855214	0.895638	0.981674	0.2139	3.97696e-11	4.69538e-10	1.75846e-05	5.8609e-07	0.00015038	9.58554e-08	0.00019417	1.73061e-05	0.00109171	1.38411e-06	-0.0483033	0.225641	0.604193
876	2959	RDN25-1	-0.0189036	0.845313	0.96663	0.54468	0.758494	0.843568	0.994842	0.99193	0.975684	0.997721	0.997499	-0.0589288	0.179688	0.522411	0.0551443	0.230381	0.22702	0.407472	0.397575	0.639326	0.658507	0.803218	-0.118888	0.107004	0.468966	0.0450933	0.122688	0.127146	0.198465	0.64174	0.628663	0.734505	0.809885	0.239892	1.08295e-13	1.91787e-12	6.7088e-06	1.47547e-05	8.68261e-10	1.29183e-11	8.39558e-05	0.000263777	2.53532e-08	4.65059e-10	0.0143327	0.719343	0.906471
876	2975	RDN25-1	0.0785181	0.417047	0.854855	0.893921	0.409589	0.57875	0.625978	0.995385	0.906079	0.995325	0.978758	-0.016687	0.704217	0.898409	0.129873	0.918986	0.438402	0.352518	0.541608	0.980948	0.829386	0.786954	-0.0189533	0.797898	0.931331	0.305075	0.922007	0.605115	0.541901	0.867306	0.9892	0.936539	0.91261	0.0662179	0.04305	0.138754	0.972755	0.148658	0.263806	0.33726	0.991212	0.378558	0.522442	0.605823	-0.0104695	0.792954	0.935151
898	908	RDN25-1	0.00874644	0.928077	0.991106	0.906851	0.552041	0.961478	0.692649	0.995385	0.935373	0.999401	0.981654	0.0701153	0.110267	0.4092	0.170888	0.963344	0.256857	0.666007	0.610578	0.991533	0.691006	0.909692	0.0135196	0.855074	0.951339	0.835481	0.492255	0.998381	0.652152	0.989652	0.866615	0.999972	0.929523	0.238943	1.3606e-13	2.34651e-12	2.86563e-08	0.00133127	6.89273e-09	5.3816e-07	7.71831e-07	0.0103815	1.43763e-07	6.39948e-06	0.0729109	0.0672044	0.321293
898	960	RDN25-1	0.0766105	0.428488	0.856457	0.401227	0.266665	0.487402	0.476619	0.978595	0.891056	0.979865	0.967168	0.076715	0.0805096	0.336248	0.10378	0.0493195	0.154267	0.140085	0.504892	0.321833	0.574875	0.551906	0.0590868	0.424337	0.79104	0.392616	0.237047	0.500243	0.485652	0.899273	0.741617	0.895638	0.90041	0.0456968	0.16289	0.377063	0.205415	0.0939203	0.314646	0.28588	0.479981	0.272131	0.580681	0.553642	-0.0432985	0.277479	0.651247
898	966	RDN25-1	-0.146615	0.128187	0.620955	0.109877	0.139194	0.10345	0.0784777	0.801029	0.786605	0.903208	0.789221	0.0290382	0.508793	0.80418	0.84903	0.782843	0.835303	0.96017	0.969543	0.947039	0.963255	0.995041	-0.0215296	0.77114	0.92287	0.621314	0.69717	0.611337	0.500381	0.952173	0.925325	0.939224	0.901827	-0.0215296	0.511072	0.75492	0.364955	0.525815	0.311067	0.172059	0.674207	0.764716	0.576617	0.408761	0.0121944	0.759815	0.925205
898	986	RDN25-1	0.103773	0.282899	0.7975	0.753279	0.244819	0.411218	0.39936	0.995385	0.891056	0.979865	0.9646	0.0527352	0.22995	0.587629	0.729094	0.22383	0.513485	0.483655	0.937942	0.627107	0.872078	0.844185	0.057649	0.435717	0.797218	0.866733	0.360218	0.635404	0.61676	0.990136	0.811007	0.943721	0.929523	-0.0235756	0.471747	0.72516	0.0328815	0.970108	0.270113	0.280561	0.134809	0.9903	0.529168	0.546158	-0.0215844	0.588382	0.846992
898	990	RDN25-1	0.169921	0.0773213	0.532837	0.0623288	0.199619	0.0849005	0.0622747	0.740226	0.867106	0.871556	0.788575	0.0261057	0.552532	0.834116	0.366057	0.911351	0.540244	0.367033	0.791767	0.978362	0.879571	0.789852	0.148518	0.0436356	0.29047	0.0350267	0.178135	0.051542	0.032906	0.586553	0.703226	0.599066	0.535701	-0.0112399	0.731555	0.892497	0.800088	0.406192	0.863843	0.856499	0.931605	0.674336	0.952656	0.945351	0.0329068	0.409261	0.754819
898	1004	RDN25-1	0.0694882	0.472768	0.876756	0.650127	0.810969	0.392261	0.479846	0.99316	0.986222	0.979865	0.967168	0.00917927	0.834589	0.953237	0.806364	0.571864	0.588513	0.814714	0.958326	0.874317	0.899084	0.954503	-0.11631	0.114883	0.484537	0.0882458	0.0639185	0.210715	0.145741	0.700805	0.546739	0.795318	0.756933	-0.0454393	0.165275	0.380977	0.127619	0.0933342	0.485778	0.266855	0.351061	0.271931	0.732851	0.530079	0.043715	0.27288	0.648597
898	1042	RDN25-1	0.0874894	0.365666	0.827359	0.477508	0.211572	0.411104	0.52369	0.99193	0.890323	0.979865	0.968555	0.130292	0.00291399	0.0308708	0.0292411	0.00352795	0.0106997	0.0277603	0.288543	0.0702383	0.140594	0.253313	0.038971	0.598422	0.870314	0.757201	0.319199	0.655978	0.836795	0.985177	0.779797	0.949631	0.966495	0.0448776	0.17057	0.386687	0.484002	0.0827032	0.2997	0.568816	0.759425	0.251555	0.566451	0.785935	-0.0473085	0.235352	0.616916
898	1052	RDN25-1	-0.0289187	0.76532	0.95376	0.69036	0.978615	0.698085	0.528464	0.995325	0.998971	0.997721	0.968555	0.0327671	0.455905	0.782163	0.707003	0.290678	0.658026	0.959723	0.934378	0.701471	0.917609	0.995041	0.0678178	0.359024	0.753349	0.497767	0.249794	0.469605	0.678162	0.931717	0.74622	0.885945	0.929858	0.000925735	0.97746	0.993138	0.793918	0.537881	0.805449	0.376615	0.929153	0.772456	0.922318	0.641858	-0.0318139	0.425002	0.762358
898	1056	RDN25-1	0.195011	0.0421483	0.423282	0.132621	0.00752724	0.182112	0.0753403	0.830605	0.310682	0.914659	0.789221	0.0454151	0.301293	0.651344	0.933229	0.0252148	0.751678	0.555493	0.982604	0.225389	0.948804	0.878028	0.034824	0.637934	0.879605	0.940444	0.145278	0.738753	0.815206	0.996787	0.657495	0.964961	0.963226	0.0894183	0.00624619	0.0257509	0.273876	0.000660488	0.473859	0.0594076	0.570321	0.0058247	0.723171	0.190627	-0.0911389	0.0220439	0.160648
898	1110	RDN25-1	-0.111811	0.24706	0.762315	0.239697	0.205218	0.12177	0.211541	0.925971	0.877106	0.912294	0.92194	0.0246823	0.574406	0.844041	0.787055	0.999856	0.672006	0.842963	0.954268	0.999856	0.92118	0.962758	0.0515592	0.485808	0.820902	0.611729	0.756032	0.941556	0.641322	0.952173	0.941469	0.991057	0.929523	-0.023663	0.470106	0.724309	0.447489	0.363179	0.0800951	0.320153	0.733206	0.634581	0.245899	0.594602	0.0246713	0.536179	0.826094
898	1124	RDN25-1	-0.111581	0.248042	0.762315	0.177289	0.285173	0.294624	0.175093	0.886505	0.891056	0.972703	0.880117	0.0331795	0.450252	0.777321	0.929697	0.62721	0.444079	0.884391	0.982585	0.896804	0.829386	0.972334	0.0303611	0.681622	0.893161	0.981191	0.756528	0.655075	0.956106	0.996787	0.941469	0.949631	0.984194	0.0166285	0.611774	0.828611	0.790732	0.804906	0.586198	0.808576	0.928237	0.916903	0.804644	0.920207	0.00349823	0.930115	0.975949
898	1133	RDN25-1	0.0985249	0.308082	0.805672	0.38763	0.171695	0.430107	0.311617	0.975792	0.828398	0.979865	0.943026	0.063007	0.151359	0.477563	0.313629	0.0669557	0.36849	0.171407	0.756899	0.368696	0.787893	0.601412	0.0607648	0.411277	0.789084	0.524591	0.205389	0.590315	0.408632	0.93919	0.711213	0.930837	0.90041	0.175422	6.81921e-08	5.19965e-07	0.000155867	2.0978e-05	6.17567e-05	2.98193e-06	0.00132135	0.000348925	0.000490322	3.13461e-05	-0.0488785	0.220157	0.595476
898	1437	RDN25-1	-0.106902	0.268553	0.786808	0.0743038	0.339173	0.314856	0.140325	0.743145	0.892077	0.97977	0.850522	0.109471	0.0124961	0.0968523	0.55981	0.0624944	0.02164	0.1728	0.8857	0.356934	0.21873	0.603879	0.0581611	0.431644	0.794766	0.803549	0.472925	0.426977	0.845065	0.989652	0.855561	0.867284	0.966529	0.133197	4.43701e-05	0.000245311	0.21297	0.00945281	0.000478951	0.0189292	0.491383	0.0503894	0.0031546	0.0784636	-0.00398018	0.920516	0.975754
898	1449	RDN25-1	0.14884	0.122434	0.61068	0.223122	0.335174	0.193882	0.250101	0.920972	0.892077	0.925795	0.943026	0.0762796	0.0822479	0.33908	0.321471	0.615982	0.235218	0.375553	0.766314	0.892005	0.667552	0.793371	0.0797415	0.280601	0.693471	0.486534	0.693585	0.428251	0.549746	0.924568	0.925325	0.868397	0.913492	0.145554	7.96226e-06	4.76002e-05	0.00554035	0.0578781	0.00111769	0.00339874	0.0315644	0.19661	0.00679926	0.0183406	0.0457309	0.251353	0.626765
898	1450	RDN25-1	0.0747275	0.439958	0.86676	0.730817	0.900628	0.538402	0.648633	0.995385	0.997597	0.979865	0.981654	0.019458	0.657993	0.882336	0.715889	0.259739	0.881308	0.854746	0.935933	0.664687	0.976138	0.963188	0.135164	0.0665961	0.362591	0.235101	0.58264	0.11715	0.171845	0.836055	0.887706	0.731283	0.788236	0.12115	0.00020626	0.00107503	0.0632371	0.530081	0.00570201	0.0163105	0.218093	0.7671	0.0292709	0.0700393	0.0881373	0.0268354	0.180769
898	1888	RDN25-1	0.131324	0.173465	0.673322	0.499053	0.5335	0.344187	0.0880435	0.99193	0.93035	0.979865	0.789302	-0.0252871	0.565061	0.840858	0.1059	0.140746	0.223264	0.739973	0.506931	0.519297	0.656176	0.933598	0.0598042	0.418725	0.790194	0.982238	0.954978	0.757549	0.197182	0.996787	0.995461	0.964961	0.808415	0.246353	2.22648e-14	4.44486e-13	2.01267e-05	0.000443355	5.22462e-08	4.41372e-14	0.000217667	0.00416121	8.47549e-07	2.89981e-12	0.0646785	0.10455	0.411456
898	2129	RDN25-1	0.185346	0.0536678	0.464142	0.196125	0.0688782	0.169714	0.0581088	0.905288	0.702359	0.914659	0.774416	0.0663044	0.131044	0.444871	0.801856	0.216484	0.7007	0.14415	0.958231	0.620131	0.931432	0.556947	0.0561165	0.448037	0.799685	0.968018	0.450928	0.910006	0.43364	0.996787	0.849584	0.985189	0.90041	0.0284334	0.385406	0.65104	0.58276	0.479359	0.635946	0.382907	0.822499	0.731565	0.834382	0.644323	-0.00916368	0.818296	0.942859
898	2133	RDN25-1	0.285818	0.00258902	0.0980258	0.0129009	0.00388799	0.00175983	0.00269476	0.408477	0.239057	0.159391	0.153953	0.0538794	0.219983	0.576287	0.725989	0.23861	0.110969	0.183176	0.937082	0.646337	0.501941	0.619657	0.0680501	0.357377	0.752158	0.685419	0.319527	0.236276	0.311193	0.961196	0.779797	0.808587	0.864274	0.00571736	0.861474	0.951608	0.509643	0.653875	0.430728	0.65665	0.775531	0.839221	0.689298	0.840154	-0.0181188	0.649632	0.873781
898	2142	RDN25-1	0.00536095	0.95588	0.99535	0.809099	0.327847	0.710392	0.891318	0.995385	0.892077	0.997721	0.995705	0.00366087	0.933629	0.986104	0.617616	0.0886936	0.426774	0.75094	0.91322	0.422259	0.823989	0.937713	0.108557	0.141324	0.530206	0.336589	0.0156884	0.406444	0.254328	0.877535	0.325872	0.857003	0.842519	-0.0300802	0.358477	0.624114	0.173451	0.185867	0.0644924	0.203702	0.433297	0.433294	0.207449	0.454825	-0.100085	0.0118887	0.112211
898	2191	RDN25-1	0.0272451	0.778542	0.954043	0.931496	0.884313	0.830954	0.876263	0.995385	0.997597	0.997721	0.995705	0.035742	0.416022	0.751729	0.993382	0.691813	0.789659	0.620448	0.995749	0.920549	0.957145	0.896772	0.00496433	0.94653	0.983331	0.702048	0.939696	0.577334	0.93487	0.966582	0.992276	0.926946	0.978278	-0.115856	0.000388261	0.00195257	0.000610609	0.0161396	3.07551e-05	0.00100171	0.00448235	0.0757411	0.000259053	0.00620868	0.0115208	0.772707	0.92928
898	2197	RDN25-1	0.00423208	0.965163	0.99535	0.833063	0.906166	0.987942	0.874319	0.995385	0.997597	0.999908	0.995705	0.00124507	0.977404	0.999169	0.642999	0.796958	0.976916	0.697908	0.917777	0.949255	0.992783	0.919471	0.115183	0.118468	0.489973	0.272986	0.2547	0.153246	0.225655	0.86576	0.750043	0.770949	0.837195	0.0233496	0.476007	0.728609	0.949373	0.904507	0.602634	0.938131	0.981138	0.960055	0.813835	0.976879	0.0169741	0.670421	0.883351
898	2220	RDN25-1	-0.0672893	0.486923	0.887656	0.545075	0.389806	0.73837	0.45317	0.99193	0.903406	0.997721	0.9646	0.0126452	0.773597	0.930023	0.75173	0.832452	0.357262	0.940874	0.941633	0.962465	0.779157	0.991824	-0.0736281	0.319243	0.724233	0.395474	0.251719	0.608827	0.293004	0.899282	0.746658	0.939224	0.86051	0.168439	2.24425e-07	1.62117e-06	8.94299e-05	0.00657603	3.01877e-07	3.36598e-05	0.000834885	0.036927	4.08934e-06	0.000274714	0.0255751	0.521346	0.819721
898	2256	RDN25-1	0.0937121	0.332426	0.821103	0.306048	0.339012	0.880452	0.254932	0.952625	0.892077	0.997721	0.943026	-0.0354802	0.419448	0.75394	0.670403	0.669269	0.0221297	0.782939	0.922204	0.919414	0.222516	0.944824	0.0473132	0.522481	0.842826	0.462874	0.512787	0.692668	0.378625	0.912592	0.879801	0.962956	0.890455	0.0226068	0.490157	0.742334	0.429076	0.54737	0.158222	0.251299	0.722828	0.777644	0.383233	0.511372	-0.00937844	0.814114	0.942607
898	2258	RDN25-1	0.0889629	0.357616	0.821103	0.314059	0.463157	0.693904	0.252302	0.952625	0.91719	0.997721	0.943026	0.0465594	0.289264	0.639931	0.247377	0.548221	0.961643	0.132677	0.696317	0.865717	0.990282	0.538486	0.0301601	0.683616	0.893583	0.574828	0.814936	0.811981	0.464666	0.947676	0.955671	0.965997	0.90041	0.0189659	0.562655	0.797842	0.437032	0.864303	0.449436	0.232748	0.726885	0.94523	0.704262	0.492085	0.00988213	0.804328	0.940667
898	2260	RDN25-1	0.0813808	0.400213	0.843524	0.480465	0.742507	0.579442	0.441151	0.99193	0.970369	0.995325	0.9646	0.0341075	0.437676	0.769438	0.628469	0.845395	0.853997	0.528647	0.916769	0.96724	0.966123	0.865914	-0.0468222	0.526811	0.844368	0.501033	0.283788	0.364207	0.525377	0.931858	0.763777	0.836691	0.911468	-0.0526619	0.107752	0.283122	0.172096	0.0632382	0.0504339	0.150517	0.430515	0.207721	0.172752	0.376414	0.0460105	0.248463	0.624193
898	2264	RDN25-1	-0.130788	0.175242	0.675141	0.120816	0.0752654	0.0654165	0.191986	0.81553	0.718069	0.830506	0.903663	0.0608296	0.16603	0.497638	0.565761	0.998249	0.932532	0.225819	0.886189	0.999856	0.985339	0.674377	-0.0515583	0.485816	0.820902	0.317585	0.194787	0.171158	0.501275	0.868392	0.705579	0.779823	0.901827	0.00228373	0.944432	0.980838	0.533504	0.271284	0.170554	0.980232	0.792118	0.538876	0.402339	0.995621	0.0606959	0.127748	0.451691
898	2266	RDN25-1	0.0336136	0.7286	0.944572	0.71963	0.618116	0.807519	0.727806	0.995385	0.942478	0.997721	0.985471	0.0168799	0.700962	0.898219	0.701308	0.543434	0.870276	0.70389	0.933184	0.8651	0.971571	0.920765	-0.000811944	0.991248	0.996939	0.971269	0.822373	0.90395	0.989823	0.996787	0.95856	0.985113	0.997414	-0.0413528	0.206716	0.44187	0.398118	0.691356	0.206783	0.308373	0.692721	0.854602	0.454749	0.581352	-0.0202665	0.611361	0.852592
898	2278	RDN25-1	0.10022	0.299794	0.803295	0.292054	0.434545	0.503513	0.436003	0.952625	0.911332	0.979865	0.9646	0.0765725	0.0810752	0.33635	0.110397	0.321235	0.372162	0.259339	0.516756	0.731086	0.791073	0.713155	0.103418	0.161254	0.565676	0.166601	0.31153	0.365702	0.294194	0.799232	0.774768	0.836691	0.86051	0.0155019	0.636103	0.847315	0.579618	0.991408	0.673773	0.882679	0.820805	0.997063	0.85193	0.95184	0.0160743	0.686943	0.893061
898	2280	RDN25-1	-0.111897	0.246694	0.762315	0.227797	0.158279	0.113379	0.155186	0.920972	0.814069	0.912294	0.868651	0.0129941	0.767528	0.927257	0.99661	0.656779	0.465743	0.693526	0.997369	0.912705	0.845285	0.917676	-0.0266414	0.71887	0.906916	0.625362	0.440796	0.336684	0.453236	0.952173	0.842792	0.836691	0.90041	0.135608	3.2099e-05	0.000180434	0.0056484	0.0701291	0.028264	0.00737045	0.0320605	0.222584	0.111864	0.0360579	0.040142	0.314049	0.684179
898	2281	RDN25-1	0.00785498	0.935391	0.992032	0.976561	0.760301	0.651611	0.790827	0.996965	0.976891	0.995892	0.98932	0.0159299	0.717048	0.904124	0.925705	0.683736	0.445476	0.70033	0.982585	0.920051	0.829386	0.919471	-0.0254294	0.731156	0.912284	0.656219	0.444486	0.315537	0.443568	0.955594	0.842792	0.832328	0.90041	0.203038	3.79667e-10	4.03606e-09	1.19125e-05	0.00190453	0.000129667	1.06296e-05	0.000139759	0.0140199	0.000951854	9.46931e-05	0.0408155	0.305992	0.676016
898	2288	RDN25-1	0.0594132	0.539425	0.903104	0.663741	0.930641	0.652579	0.825045	0.99316	0.997597	0.995892	0.994181	-0.00946978	0.829433	0.950134	0.659812	0.330118	0.645232	0.345133	0.917777	0.733118	0.914701	0.784391	-0.0677777	0.359309	0.753349	0.314748	0.173535	0.303774	0.182761	0.867306	0.699389	0.823258	0.788482	0.174664	7.77964e-08	5.86411e-07	0.00026815	0.0174294	4.02803e-05	0.000328164	0.002129	0.0803589	0.000329772	0.00226355	0.0500316	0.209452	0.582223
898	2314	RDN25-1	0.0924029	0.339255	0.821103	0.374858	0.232957	0.48073	0.526168	0.970097	0.891056	0.979865	0.968555	0.0163408	0.710074	0.900637	0.764951	0.389377	0.931494	0.810793	0.947591	0.779348	0.985339	0.954216	-0.00123489	0.98669	0.995149	0.98542	0.685925	0.782304	0.709161	0.996787	0.922555	0.965422	0.933884	-0.00777572	0.812407	0.926296	0.856823	0.591797	0.474238	0.355349	0.953315	0.803504	0.723331	0.620697	-0.0362685	0.363061	0.72342
898	2337	RDN25-1	-0.0385468	0.690668	0.937818	0.329306	0.343275	0.537818	0.795195	0.961935	0.892077	0.979865	0.98932	0.0100842	0.818552	0.947375	0.325148	0.378827	0.774427	0.651527	0.770504	0.772729	0.954334	0.908404	0.232332	0.00146112	0.0410516	0.0334742	0.0462322	0.0073037	0.0015715	0.578173	0.493276	0.352443	0.248311	0.193868	2.31902e-09	2.1219e-08	0.00274816	0.012719	1.47457e-05	7.94813e-08	0.0171956	0.063426	0.000134565	1.17347e-06	0.0638053	0.109327	0.419725
898	2340	RDN25-1	0.112557	0.2439	0.762315	0.424549	0.636712	0.415309	0.283985	0.983968	0.947497	0.979865	0.943026	0.0698008	0.111877	0.411591	0.456774	0.89669	0.421403	0.179834	0.840126	0.973579	0.819724	0.615368	0.0937647	0.204265	0.614497	0.432027	0.711413	0.416992	0.252234	0.912525	0.928957	0.863232	0.842519	0.00331595	0.919388	0.971089	0.550778	0.269869	0.504385	0.98733	0.801908	0.537284	0.746774	0.996347	0.0618965	0.120368	0.442495
898	2347	RDN25-1	0.0657447	0.497	0.890289	0.631402	0.613402	0.420587	0.496102	0.99316	0.941893	0.979865	0.968555	-0.00224065	0.959348	0.99218	0.736236	0.825752	0.775837	0.980052	0.938192	0.961913	0.954334	0.997404	-0.0593894	0.421965	0.790194	0.356203	0.4148	0.58669	0.476832	0.878741	0.834248	0.93049	0.90041	0.125689	0.00011745	0.000622998	0.0130937	0.0303344	0.000321354	0.000828974	0.0657937	0.121708	0.00221078	0.0052495	0.0112192	0.778501	0.932745
898	2349	RDN25-1	0.0233853	0.80927	0.957799	0.783484	0.730505	0.664853	0.864968	0.995385	0.964757	0.995892	0.995705	0.00216194	0.960775	0.993032	0.354207	0.793414	0.644231	0.936638	0.785532	0.949255	0.914661	0.99125	-0.0261555	0.723787	0.909426	0.338457	0.88704	0.946678	0.682118	0.877629	0.980707	0.991974	0.930741	0.0789751	0.0157728	0.0591077	0.542224	0.0802752	0.0117535	0.0599175	0.799195	0.245808	0.0542852	0.191561	-0.0138487	0.72844	0.912003
898	2351	RDN25-1	0.047707	0.622286	0.9221	0.904543	0.604754	0.869307	0.88629	0.995385	0.941893	0.997721	0.995705	0.0361939	0.410148	0.750362	0.655226	0.269667	0.915749	0.950909	0.917777	0.675796	0.985339	0.993634	0.0811202	0.272342	0.686482	0.796412	0.796065	0.52445	0.540938	0.989652	0.952668	0.899127	0.91261	-0.005179	0.874404	0.956906	0.141817	0.0405657	0.36295	0.323284	0.377642	0.152513	0.625388	0.59649	0.103329	0.00939345	0.0960933
898	2416	RDN25-1	0.0626477	0.517531	0.897613	0.55169	0.7712	0.633494	0.496294	0.99193	0.978062	0.995892	0.968555	0.00968555	0.825608	0.948584	0.86802	0.723818	0.930792	0.741376	0.97313	0.928805	0.985339	0.934005	0.0108406	0.883563	0.96294	0.901612	0.813478	0.967981	0.825115	0.993093	0.955671	0.99555	0.964987	0.0633473	0.0529494	0.16331	0.159168	0.545465	0.213179	0.0715527	0.408851	0.776501	0.461859	0.218398	0.0312804	0.432812	0.769502
898	2417	RDN25-1	-0.091105	0.346111	0.821103	0.223553	0.257428	0.283726	0.298955	0.920972	0.891056	0.96429	0.943026	-0.0844307	0.0543396	0.271847	0.0256865	0.058426	0.0393022	0.0440773	0.265254	0.342279	0.302006	0.324468	0.0185191	0.802432	0.933337	0.836367	0.884827	0.996341	0.95836	0.989652	0.979185	0.999972	0.984218	0.144779	8.90648e-06	5.26714e-05	0.0131437	0.0309297	0.00130142	0.000716516	0.0659192	0.123343	0.00782637	0.00462654	0.0310659	0.435976	0.771123
898	2421	RDN25-1	-0.129501	0.179563	0.684585	0.119263	0.276753	0.205264	0.130104	0.81553	0.891056	0.934892	0.845243	-0.0561532	0.201102	0.552581	0.101086	0.476124	0.266752	0.103374	0.503668	0.822976	0.69933	0.486858	0.0797	0.280852	0.693471	0.557697	0.285781	0.307835	0.477062	0.94709	0.76454	0.8255	0.90041	0.228957	1.41934e-12	2.00657e-11	6.29137e-06	3.79763e-06	3.79792e-09	7.20016e-08	7.91088e-05	8.53007e-05	8.45842e-08	1.07511e-06	-0.0126459	0.751211	0.921254
898	2619	RDN25-1	0.0408315	0.67335	0.936421	0.978586	0.627477	0.661107	0.957677	0.996965	0.94725	0.995892	0.995705	0.0801211	0.0679133	0.308272	0.495785	0.132803	0.0912641	0.361998	0.858315	0.504257	0.455501	0.787075	0.0847326	0.251489	0.661558	0.613135	0.265313	0.261398	0.52949	0.952173	0.760164	0.815631	0.91261	0.125045	0.000127368	0.000671283	0.0653499	0.00980023	0.00109153	0.0201299	0.223495	0.0517169	0.00667103	0.0821305	-0.0116093	0.77101	0.927916
898	2634	RDN25-1	0.0662807	0.493491	0.889035	0.688728	0.632726	0.507944	0.516007	0.995083	0.947497	0.979865	0.968555	-0.0678545	0.122255	0.429784	0.0851294	0.176326	0.181093	0.165663	0.464315	0.578508	0.609363	0.593651	0.125442	0.0888759	0.418789	0.214135	0.198713	0.107488	0.109748	0.831235	0.709144	0.729334	0.728327	-0.0593218	0.0699666	0.201108	0.0590521	0.163357	0.143052	0.124693	0.208317	0.400842	0.358379	0.331339	0.0147117	0.712246	0.904493
898	2640	RDN25-1	-0.0441724	0.648333	0.929333	0.296252	0.495764	0.346928	0.314486	0.952625	0.922384	0.979865	0.943026	0.0676952	0.123136	0.43196	0.952103	0.53041	0.749724	0.845719	0.987493	0.857284	0.948078	0.963059	0.0135009	0.855272	0.951339	0.531737	0.854095	0.627586	0.56984	0.93919	0.971827	0.942067	0.917305	0.181004	2.54161e-08	2.04696e-07	0.00780611	0.00386752	0.000954889	0.00131221	0.0425611	0.0243737	0.00591851	0.00794583	0.0294319	0.460505	0.785961
898	2724	RDN25-1	-0.108262	0.262478	0.781397	0.181904	0.435961	0.281216	0.203373	0.893537	0.911332	0.96429	0.911157	0.0496417	0.258486	0.61413	0.718949	0.225223	0.333011	0.5577	0.935933	0.628997	0.765407	0.878151	0.0851369	0.249226	0.659825	0.500443	0.205172	0.288764	0.412461	0.931858	0.711213	0.820226	0.90041	0.13121	5.77062e-05	0.000314189	0.0224342	0.00325556	0.00100421	0.00421717	0.100097	0.0211633	0.00618048	0.0222545	-0.0244613	0.539655	0.826801
898	2729	RDN25-1	-0.0651411	0.500968	0.893442	0.561133	0.733009	0.344799	0.440207	0.99316	0.964757	0.979865	0.9646	0.0807301	0.0658414	0.302168	0.111492	0.0739325	0.319737	0.169762	0.516756	0.39509	0.755638	0.60126	0.14031	0.0567911	0.33525	0.0738736	0.0503773	0.164639	0.104198	0.678123	0.508841	0.778705	0.721134	0.144744	8.95139e-06	5.26948e-05	0.000725634	0.00105602	0.00392456	0.000651467	0.0051961	0.00856552	0.0207938	0.0042273	-0.0283466	0.477214	0.794609
898	2735	RDN25-1	0.0355835	0.713368	0.940686	0.91379	0.464303	0.925449	0.968347	0.995385	0.91719	0.997721	0.995705	0.0362177	0.409841	0.750362	0.824816	0.192119	0.838036	0.944804	0.964052	0.591898	0.963255	0.992555	-0.00200157	0.978428	0.995149	0.74715	0.631964	0.723062	0.596736	0.980159	0.906476	0.964961	0.929523	-0.0486932	0.137009	0.335793	0.100841	0.921825	0.0596131	0.0228785	0.297429	0.970177	0.196074	0.0906858	-0.0434871	0.275391	0.649045
898	2791	RDN25-1	0.0222402	0.818445	0.96	0.769255	0.964428	0.857531	0.848419	0.995385	0.997597	0.997721	0.995705	-0.0695396	0.113228	0.411885	0.254145	0.113677	0.027085	0.140917	0.699365	0.474881	0.254713	0.551906	0.0379347	0.608193	0.871603	0.571077	0.900034	0.973476	0.654936	0.947676	0.984139	0.996912	0.929523	0.125586	0.000118991	0.000630155	0.00251094	0.0620872	0.0309129	0.0014764	0.015939	0.206017	0.119119	0.00879817	0.0270586	0.497466	0.809391
898	2793	RDN25-1	0.316532	0.000798692	0.046156	0.0107805	0.00410563	0.00176867	0.00143915	0.384786	0.245218	0.159391	0.136713	-0.0384732	0.381282	0.720564	0.0610639	0.359617	0.34739	0.395775	0.408336	0.762156	0.770515	0.798163	0.0774234	0.294865	0.702304	0.851324	0.488337	0.381787	0.345157	0.989652	0.865373	0.847197	0.885001	0.0882424	0.00696597	0.0285397	0.556259	0.182003	0.0436016	0.0282683	0.803628	0.427805	0.15709	0.105825	0.0175168	0.660533	0.880533
898	2815	RDN25-1	-0.111897	0.246694	0.762315	0.346154	0.351887	0.118528	0.368957	0.961935	0.892077	0.912294	0.956928	0.0346582	0.430308	0.764116	0.363006	0.447948	0.803132	0.258796	0.791162	0.804653	0.958216	0.713155	0.0274888	0.710322	0.90321	0.609062	0.650905	0.804272	0.538775	0.952173	0.912308	0.965422	0.91261	0.147056	6.39802e-06	3.8599e-05	0.000265043	0.0026402	0.0109263	1.35016e-05	0.00211071	0.0177454	0.0512755	0.000117491	-0.0117234	0.768823	0.927663
898	2826	RDN25-1	0.0635915	0.511229	0.897276	0.85338	0.426571	0.651065	0.532265	0.995385	0.909927	0.995892	0.968555	0.0636918	0.146954	0.469512	0.71915	0.159275	0.353157	0.19536	0.935933	0.556806	0.774705	0.645794	-0.00696448	0.925041	0.97772	0.529077	0.859756	0.757465	0.928696	0.93919	0.974315	0.964961	0.978278	0.00198265	0.951748	0.984878	0.340393	0.648147	0.696396	0.960887	0.646088	0.835064	0.868183	0.988174	-0.0222746	0.576508	0.843335
898	2843	RDN25-1	0.14327	0.137222	0.632006	0.375305	0.345119	0.171054	0.351195	0.970097	0.892077	0.914659	0.954535	-0.0357451	0.415981	0.751729	0.103068	0.202302	0.420445	0.0836926	0.504892	0.604833	0.819724	0.443436	0.0500155	0.498979	0.82802	0.981614	0.927724	0.564112	0.992601	0.996787	0.98986	0.924572	0.997875	0.00475103	0.884707	0.958679	0.289235	0.481239	0.993354	0.251054	0.587865	0.732732	0.995747	0.511372	0.0421704	0.290203	0.66169
898	2865	RDN25-1	0.196889	0.0401686	0.41557	0.0811086	0.0831828	0.0722384	0.064618	0.743145	0.730096	0.847002	0.788575	0.0203248	0.643788	0.878839	0.963317	0.89413	0.928393	0.854707	0.987493	0.973332	0.985339	0.963188	-0.029243	0.692742	0.897873	0.564042	0.632543	0.568731	0.606202	0.94709	0.906476	0.925464	0.929523	0.0177591	0.587778	0.815217	0.998345	0.916559	0.961515	0.868265	0.999105	0.96763	0.984665	0.947156	0.0121904	0.759892	0.925205
898	2870	RDN25-1	0.219214	0.0220096	0.322221	0.0462275	0.0975791	0.0215522	0.0768383	0.706629	0.754229	0.554434	0.789221	0.0749183	0.0878799	0.352161	0.266317	0.608279	0.0810363	0.51009	0.707881	0.888537	0.42729	0.860037	-0.045298	0.540367	0.848386	0.458115	0.304208	0.673203	0.263587	0.912525	0.766773	0.954313	0.844266	-0.0292576	0.371778	0.637912	0.317327	0.16979	0.662784	0.0640414	0.622997	0.410495	0.847873	0.201076	0.0436946	0.273104	0.648597
898	2880	RDN25-1	0.00366453	0.969833	0.996313	0.834559	0.895317	0.678497	0.802567	0.995385	0.997597	0.997721	0.989744	0.0523015	0.23381	0.591983	0.190457	0.30351	0.067963	0.131756	0.63527	0.716645	0.3872	0.538486	-0.00147295	0.984124	0.995149	0.838799	0.916495	0.638175	0.796228	0.989652	0.988731	0.943986	0.957672	-0.0222927	0.496208	0.74567	0.924641	0.82529	0.679739	0.989723	0.974735	0.928818	0.852332	0.997187	-0.0105602	0.791202	0.935151
898	2921	RDN25-1	0.133025	0.167911	0.666385	0.451449	0.21622	0.313212	0.254706	0.983998	0.891056	0.97977	0.943026	0.0488657	0.266012	0.621651	0.903829	0.424962	0.716403	0.527627	0.979565	0.796419	0.940883	0.865914	0.0927881	0.209039	0.622019	0.644744	0.283621	0.431321	0.339169	0.953659	0.763777	0.869408	0.883561	0.0314563	0.336904	0.605105	0.590833	0.555498	0.986338	0.725537	0.824339	0.783977	0.994735	0.881427	0.000124038	0.997519	0.998406
898	2922	RDN25-1	0.133025	0.167911	0.666385	0.339812	0.293962	0.519203	0.208248	0.961935	0.891056	0.979865	0.915176	0.0273844	0.533235	0.817726	0.896082	0.908434	0.415894	0.658863	0.97893	0.977227	0.815866	0.908904	-0.0498278	0.500593	0.82862	0.301983	0.417782	0.136441	0.480353	0.867306	0.834248	0.747223	0.90041	0.0169161	0.605627	0.826564	0.69429	0.948386	0.198428	0.77217	0.883327	0.980086	0.441922	0.908421	0.0203565	0.60978	0.85183
898	2923	RDN25-1	0.0832226	0.389598	0.842701	0.451019	0.635807	0.734036	0.45779	0.983998	0.947497	0.997721	0.9646	0.0320499	0.465831	0.788373	0.614014	0.997955	0.738592	0.621983	0.912084	0.999856	0.943976	0.896772	0.051906	0.482875	0.820902	0.564701	0.819882	0.967259	0.574842	0.94709	0.95856	0.99555	0.918356	0.0334931	0.306539	0.572795	0.520981	0.980672	0.701794	0.508146	0.782364	0.993909	0.870477	0.73698	0.0322065	0.419308	0.759187
898	2944	RDN25-1	-0.0124936	0.897407	0.983221	0.846471	0.676823	0.639364	0.924914	0.995385	0.948917	0.995892	0.995705	0.010091	0.818432	0.947375	0.96408	0.713174	0.61215	0.512979	0.987493	0.927107	0.899084	0.860393	0.0351307	0.634975	0.879381	0.736508	0.976265	0.997655	0.467065	0.978407	0.996242	0.999972	0.90041	0.00545604	0.867746	0.953739	0.960369	0.610098	0.450974	0.478127	0.985769	0.813463	0.704526	0.713659	0.032555	0.414291	0.756988
898	2946	RDN25-1	0.0567406	0.557854	0.903104	0.470051	0.827243	0.90537	0.623944	0.98922	0.986331	0.997721	0.978758	-0.00822562	0.851563	0.959647	0.849641	0.497979	0.288999	0.758843	0.969543	0.835572	0.724391	0.940679	-0.0399749	0.589026	0.866184	0.791651	0.398331	0.284703	0.551456	0.989652	0.834248	0.820226	0.913492	0.155712	1.73915e-06	1.11023e-05	8.16087e-05	0.0198979	0.00465623	0.000110991	0.000779882	0.0881816	0.0243272	0.000828647	0.0331955	0.405163	0.752831
898	2948	RDN25-1	0.00249255	0.979478	0.997128	0.779433	0.718503	0.644715	0.95465	0.995385	0.962663	0.995892	0.995705	0.00229718	0.958323	0.99218	0.590258	0.521802	0.342888	0.903144	0.897164	0.853264	0.766345	0.979496	0.151953	0.0389443	0.270371	0.0276675	0.197575	0.190713	0.0656853	0.55931	0.708359	0.790649	0.646328	0.153812	2.32918e-06	1.4614e-05	4.48196e-05	0.0326475	0.00790047	0.000157542	0.000446159	0.128056	0.0386638	0.00114687	0.0414384	0.298664	0.669251
898	2959	RDN25-1	0.0955454	0.323013	0.814455	0.498972	0.296874	0.601336	0.62106	0.99193	0.891056	0.995892	0.978758	-0.00105333	0.980883	0.999169	0.622505	0.795003	0.382954	0.344009	0.91474	0.949255	0.79648	0.784391	0.02004	0.786581	0.929474	0.947382	0.669611	0.776944	0.746367	0.996787	0.922294	0.965422	0.945141	0.166522	3.08627e-07	2.18158e-06	0.00135573	0.000500932	0.00155174	0.00159648	0.00913556	0.00457101	0.00910262	0.00942818	-0.0169372	0.671095	0.883351
898	2975	RDN25-1	-0.0407956	0.673621	0.936421	0.425213	0.416977	0.498747	0.444618	0.983974	0.908276	0.979865	0.9646	0.045912	0.296029	0.646866	0.944799	0.987103	0.723364	0.856106	0.983729	0.998829	0.942318	0.963188	0.191292	0.00909808	0.119399	0.0636284	0.0904358	0.0366078	0.0465376	0.647478	0.574071	0.55244	0.590141	0.0619932	0.0582402	0.174721	0.655676	0.775812	0.394742	0.518938	0.864055	0.903738	0.652441	0.744823	0.0468982	0.239443	0.618342
908	960	RDN25-1	0.1691	0.0787842	0.534704	0.200418	0.357018	0.134167	0.197392	0.905288	0.892843	0.912294	0.909249	-0.10218	0.0197767	0.134084	0.00928553	0.00449711	0.0159034	0.00389114	0.151567	0.0798541	0.179375	0.0818633	-0.0766228	0.299902	0.708248	0.162021	0.0878494	0.232437	0.139647	0.794667	0.573261	0.808587	0.752226	0.00819935	0.802392	0.922888	0.511792	0.236285	0.810565	0.420612	0.775873	0.496368	0.922923	0.673184	0.0710436	0.0745359	0.339118
908	966	RDN25-1	0.0177489	0.854655	0.970101	0.618846	0.723334	0.809553	0.760447	0.99316	0.96306	0.997721	0.98932	0.0504367	0.250929	0.607764	0.722892	0.245535	0.870866	0.972744	0.936336	0.651783	0.971571	0.996021	0.0829816	0.261455	0.673573	0.867566	0.231544	0.606115	0.662281	0.990136	0.732908	0.936726	0.929523	-0.0168443	0.607159	0.826564	0.0523174	0.944888	0.135743	0.0909755	0.192025	0.9787	0.346678	0.263598	-0.0205181	0.606943	0.850423
908	986	RDN25-1	-0.159091	0.0984629	0.568872	0.213063	0.0124541	0.10058	0.0961384	0.916416	0.376948	0.896011	0.790816	-0.121762	0.00543151	0.0512647	0.0886963	0.000147109	0.00932338	0.00758388	0.473257	0.00840443	0.130415	0.115875	-0.0382252	0.605446	0.870678	0.927244	0.0878015	0.564894	0.548472	0.996787	0.573261	0.924595	0.912847	0.0380787	0.244991	0.498343	0.121843	0.177947	0.43786	0.45343	0.339198	0.4213	0.695284	0.698052	0.109277	0.00599966	0.0708347
908	990	RDN25-1	0.179948	0.061156	0.488951	0.0791589	0.851316	0.0320682	0.0463219	0.743145	0.991692	0.638448	0.727543	-0.0414641	0.345345	0.69035	0.450447	0.000891502	0.929287	0.676555	0.837033	0.0296566	0.985339	0.916877	-0.0117254	0.874136	0.960034	0.894413	0.045443	0.748824	0.906539	0.993093	0.493276	0.964961	0.974789	0.0367918	0.261316	0.517293	0.397202	0.0188498	0.0627496	0.13685	0.692665	0.0845347	0.202587	0.352937	0.160271	5.2515e-05	0.00215951
908	1004	RDN25-1	0.13227	0.170358	0.669171	0.502236	0.378615	0.142753	0.252922	0.99193	0.898391	0.912294	0.943026	-0.014545	0.740722	0.913273	0.14853	0.391335	0.96586	0.526284	0.580542	0.782075	0.991339	0.865914	0.05821	0.431257	0.794766	0.952127	0.813813	0.343497	0.596669	0.996787	0.955671	0.836691	0.929523	0.00731333	0.823372	0.931384	0.209597	0.565537	0.545534	0.810467	0.485304	0.79139	0.777642	0.92063	0.0378456	0.342556	0.709241
908	1042	RDN25-1	0.19406	0.0431815	0.428381	0.0545544	0.103242	0.0945153	0.0687153	0.724085	0.757754	0.889153	0.788575	0.00850857	0.846519	0.957048	0.821394	0.845743	0.729835	0.956548	0.964052	0.96724	0.942998	0.995041	0.0440598	0.551506	0.850983	0.558924	0.78465	0.816557	0.675928	0.94709	0.94851	0.967635	0.929858	-0.0192415	0.556993	0.792885	0.725939	0.455814	0.257191	0.433266	0.899438	0.712991	0.515993	0.68181	0.0204011	0.608997	0.85119
908	1052	RDN25-1	-0.0777656	0.421539	0.854855	0.510048	0.43921	0.754859	0.428317	0.99193	0.911332	0.997721	0.9646	-0.0536958	0.221561	0.576913	0.40894	0.330869	0.876929	0.250896	0.816638	0.733776	0.975273	0.704439	0.016334	0.825345	0.941305	0.753355	0.90237	0.430651	0.862804	0.984684	0.984139	0.869408	0.966529	-0.0113014	0.730143	0.892058	0.964553	0.74907	0.381724	0.717766	0.986844	0.890749	0.642754	0.877122	0.00570354	0.886299	0.963052
908	1056	RDN25-1	-0.0663344	0.493141	0.889035	0.471149	0.368971	0.318532	0.313237	0.989752	0.892843	0.97977	0.943026	0.0254112	0.563153	0.840511	0.754711	0.931206	0.840205	0.825533	0.944018	0.987197	0.963255	0.957618	-0.00991674	0.893425	0.965545	0.820529	0.639378	0.566222	0.557374	0.989652	0.908753	0.925033	0.915453	0.0306043	0.35016	0.616477	0.621148	0.998785	0.902577	0.884396	0.842734	0.999166	0.964588	0.952224	0.0306852	0.441622	0.772823
908	1110	RDN25-1	-0.0492576	0.611001	0.917731	0.513283	0.226324	0.526864	0.508484	0.99193	0.891056	0.979865	0.968555	-0.0591752	0.177872	0.519417	0.146977	0.0213332	0.134738	0.116207	0.578228	0.208415	0.548129	0.503143	-0.114764	0.11982	0.491517	0.100673	0.0231866	0.0987847	0.0902996	0.728992	0.385661	0.718301	0.697962	-0.0193156	0.555475	0.792779	0.392211	0.0579057	0.382454	0.336169	0.689452	0.19661	0.643051	0.605104	0.0813237	0.0411356	0.236786
908	1124	RDN25-1	0.0408902	0.672908	0.936421	0.442741	0.260624	0.70212	0.694485	0.983998	0.891056	0.997721	0.981654	0.0386185	0.379484	0.719241	0.148891	0.0509508	0.460627	0.443198	0.580542	0.32738	0.842399	0.822653	-0.0276009	0.709193	0.90321	0.888877	0.540148	0.709777	0.71703	0.993093	0.88379	0.964131	0.936093	-0.00529259	0.871673	0.955823	0.44879	0.156066	0.857397	0.87299	0.733854	0.389499	0.948123	0.947522	-0.0805277	0.0431652	0.242225
908	1133	RDN25-1	0.0810505	0.402134	0.845328	0.320754	0.546234	0.572394	0.34205	0.954632	0.934339	0.994218	0.952361	0.0192259	0.66182	0.882709	0.44162	0.957805	0.930864	0.479915	0.832851	0.991533	0.985339	0.841056	0.0915324	0.215294	0.628509	0.162857	0.38184	0.38851	0.172708	0.794667	0.825905	0.850645	0.788236	0.18882	6.05356e-09	5.27525e-08	1.66703e-06	0.000987966	2.43039e-05	1.03377e-07	2.47511e-05	0.00811998	0.000212195	1.47818e-06	0.015992	0.688461	0.893061
908	1437	RDN25-1	0.0377253	0.696935	0.937818	0.881512	0.594399	0.832232	0.904779	0.995385	0.941893	0.997721	0.995705	-0.0147433	0.737316	0.913056	0.492003	0.933806	0.137189	0.412598	0.858315	0.987197	0.556376	0.805214	0.0912763	0.216586	0.628509	0.396009	0.198873	0.684559	0.401903	0.899282	0.709144	0.957881	0.89966	0.236198	2.62058e-13	4.29463e-12	9.21041e-07	9.52862e-07	4.90484e-06	3.01278e-08	1.45813e-05	2.60846e-05	5.01554e-05	4.85742e-07	-0.01982	0.619235	0.856682
908	1449	RDN25-1	-0.0513455	0.595951	0.911096	0.640486	0.324106	0.433598	0.710825	0.99316	0.891056	0.979865	0.981825	0.00791458	0.857114	0.963595	0.842746	0.439177	0.678216	0.661318	0.968624	0.802054	0.921828	0.909309	0.0591054	0.424191	0.79104	0.448194	0.963538	0.699277	0.354884	0.912525	0.995694	0.964131	0.886536	0.201896	4.77911e-10	4.93492e-09	3.1697e-06	0.00492411	9.14845e-06	1.88606e-08	4.24999e-05	0.0297484	8.7745e-05	3.15705e-07	0.0551562	0.166415	0.512937
908	1450	RDN25-1	0.0652517	0.500239	0.892834	0.478977	0.64831	0.743405	0.493177	0.99193	0.947996	0.997721	0.968555	-0.0452883	0.302645	0.652076	0.492283	0.00888378	0.121542	0.405948	0.858315	0.121486	0.524488	0.802945	0.059692	0.419599	0.790194	0.404026	0.52652	0.724763	0.414646	0.900743	0.883318	0.964961	0.90041	0.193869	2.31854e-09	2.1219e-08	4.26378e-06	0.124358	3.42895e-05	2.3389e-07	5.51981e-05	0.334508	0.000286072	3.07331e-06	0.114155	0.00408849	0.05357
908	1888	RDN25-1	0.0418875	0.665402	0.93613	0.877493	0.458583	0.80454	0.621506	0.995385	0.915077	0.997721	0.978758	0.0120585	0.783836	0.93245	0.797541	0.4109	0.926987	0.678025	0.957274	0.789996	0.985339	0.916877	0.02146	0.77186	0.92287	0.957061	0.491087	0.951287	0.704691	0.996787	0.866615	0.992845	0.932143	0.222339	6.32683e-12	8.36971e-11	6.87388e-06	6.627e-07	1.31013e-07	1.56438e-09	8.5614e-05	1.93508e-05	1.91279e-06	3.26285e-08	-0.038199	0.338065	0.70673
908	2129	RDN25-1	0.0644156	0.505759	0.895499	0.564372	0.736142	0.868087	0.467811	0.99316	0.966487	0.997721	0.965245	-0.0661239	0.132099	0.446914	0.188747	0.123007	0.0225543	0.248323	0.631883	0.489615	0.225371	0.698708	0.0642698	0.384771	0.771886	0.463433	0.675489	0.831649	0.348464	0.912592	0.922297	0.967816	0.885001	-0.0224326	0.493508	0.745128	0.545409	0.34206	0.0779369	0.737696	0.800767	0.615287	0.240679	0.888073	0.0280679	0.481559	0.798718
908	2133	RDN25-1	0.125767	0.192544	0.707069	0.651843	0.364154	0.215751	0.222764	0.99316	0.892843	0.935424	0.931423	-0.0371763	0.397551	0.737766	0.0301448	0.283873	0.456189	0.422294	0.290892	0.693325	0.838129	0.810088	-0.001926	0.979242	0.995149	0.318984	0.727037	0.980889	0.95736	0.868392	0.93409	0.999699	0.984218	0.0442058	0.177067	0.397137	0.428989	0.764799	0.264791	0.280037	0.722828	0.895349	0.52313	0.545544	0.028321	0.477612	0.794609
908	2142	RDN25-1	-0.0925358	0.338557	0.821103	0.33563	0.387027	0.148875	0.29917	0.961935	0.90169	0.912294	0.943026	-0.010876	0.804583	0.942847	0.733187	0.849612	0.188755	0.628548	0.937942	0.96724	0.616975	0.900682	-0.0658389	0.373249	0.762486	0.368743	0.441892	0.127464	0.316358	0.889191	0.842792	0.734505	0.864274	0.0442938	0.176205	0.396192	0.40776	0.412096	0.79432	0.418784	0.702971	0.67942	0.916362	0.671877	0.000716733	0.985664	0.994723
908	2191	RDN25-1	-0.177133	0.0653867	0.503151	0.103824	0.0180482	0.0497763	0.13224	0.781803	0.443276	0.766908	0.845567	-0.0251908	0.566546	0.84101	0.772428	0.0958587	0.350072	0.991316	0.949698	0.434339	0.773101	0.998448	-0.138859	0.0594264	0.343218	0.111045	0.0125408	0.0416679	0.147366	0.757097	0.299611	0.578755	0.760661	-0.0492892	0.132261	0.328135	0.372695	0.0178341	0.0747425	0.543444	0.680529	0.0815103	0.232454	0.767834	0.0764702	0.0548689	0.283339
908	2197	RDN25-1	-0.0612379	0.527018	0.901809	0.995556	0.170085	0.668079	0.692215	0.999197	0.828398	0.995892	0.981654	-0.0153104	0.727607	0.908131	0.386553	0.0942345	0.964859	0.907874	0.805643	0.433314	0.991339	0.979496	0.046404	0.530513	0.847073	0.184626	0.639737	0.419014	0.391483	0.808045	0.908773	0.863232	0.894623	0.00660442	0.840251	0.938918	0.123944	0.130455	0.543539	0.477148	0.342868	0.346649	0.776693	0.71328	0.0867868	0.0292685	0.191346
908	2220	RDN25-1	0.208081	0.0299155	0.36907	0.0336687	0.0374968	0.066974	0.0277081	0.649659	0.63988	0.842142	0.617093	0.0389891	0.374924	0.717606	0.362126	0.388283	0.763751	0.290338	0.791162	0.779274	0.951489	0.736054	0.134014	0.0689647	0.366995	0.0761004	0.0865105	0.161412	0.060326	0.680244	0.573261	0.778329	0.62342	0.217978	1.65149e-11	2.02985e-10	1.98842e-07	9.62854e-06	6.49793e-07	1.54949e-09	4.18046e-06	0.000183361	8.09316e-06	3.25766e-08	-0.0137385	0.730516	0.913139
908	2256	RDN25-1	-0.00076851	0.993672	0.998197	0.740806	0.691705	0.849211	0.629706	0.995385	0.953225	0.997721	0.980953	-0.0937477	0.0325703	0.191242	0.27433	0.0259852	0.138775	0.369379	0.717571	0.226553	0.557435	0.789852	0.00666747	0.928229	0.97772	0.608025	0.682663	0.734275	0.472555	0.952173	0.922555	0.964961	0.90041	0.035889	0.273209	0.533146	0.110205	0.907199	0.157598	0.0272105	0.31549	0.961058	0.38272	0.102891	0.0420771	0.291272	0.66169
908	2258	RDN25-1	0.0537957	0.578504	0.908723	0.592537	0.72436	0.478152	0.534402	0.99316	0.96306	0.979865	0.968555	0.10708	0.0145678	0.109308	0.0420497	0.133373	0.0114553	0.0174741	0.354454	0.504322	0.147572	0.19966	0.0860216	0.244323	0.65517	0.280554	0.415912	0.185157	0.224206	0.86612	0.834248	0.790649	0.836791	0.0792208	0.0154497	0.0579627	0.0679692	0.23112	0.0135544	0.0222135	0.229593	0.489826	0.0612043	0.0885844	0.0157225	0.693443	0.897172
908	2260	RDN25-1	0.0740787	0.44395	0.868663	0.35886	0.987786	0.695281	0.384595	0.965316	0.999646	0.997721	0.963664	0.000893261	0.983788	0.999449	0.679507	0.220089	0.504275	0.757066	0.924647	0.621928	0.864472	0.940545	0.0766595	0.29967	0.708248	0.229415	0.991342	0.590218	0.246874	0.834848	0.997698	0.930837	0.842519	-0.0145872	0.656153	0.857804	0.8796	0.0888542	0.21906	0.994574	0.959562	0.263852	0.469034	0.997598	0.0757244	0.0572843	0.29255
908	2264	RDN25-1	0.0236306	0.807308	0.957799	0.709448	0.700907	0.710037	0.911773	0.995385	0.956378	0.997721	0.995705	0.0695282	0.113287	0.411885	0.893454	0.152252	0.87223	0.244198	0.97893	0.544772	0.971952	0.697511	0.0287737	0.69743	0.898722	0.680248	0.590244	0.678144	0.834634	0.960787	0.887706	0.957881	0.966115	0.00963357	0.768736	0.910329	0.235674	0.604661	0.190319	0.944208	0.525318	0.8095	0.431915	0.98119	-0.017888	0.653803	0.876883
908	2266	RDN25-1	0.0146435	0.879875	0.979439	0.76931	0.985425	0.8758	0.871615	0.995385	0.999646	0.997721	0.995705	-0.0767581	0.0803389	0.336248	0.0232387	0.142886	0.031094	0.12687	0.248258	0.522987	0.27694	0.525063	-0.0251302	0.734199	0.913656	0.389156	0.662703	0.481108	0.766962	0.897106	0.920012	0.892972	0.950612	0.00769464	0.814327	0.927156	0.399793	0.925448	0.563712	0.806613	0.693514	0.970656	0.789126	0.920207	0.0126689	0.750773	0.921254
908	2278	RDN25-1	0.106171	0.271859	0.790818	0.306567	0.49582	0.43489	0.367188	0.952625	0.922384	0.979865	0.956928	0.0415159	0.344742	0.69035	0.441141	0.888155	0.767575	0.585986	0.832851	0.973332	0.952852	0.888886	-0.0776634	0.293367	0.700939	0.339968	0.201274	0.186117	0.239528	0.877629	0.709245	0.790649	0.839937	0.0126706	0.698957	0.878533	0.777697	0.703007	0.721897	0.957399	0.924729	0.861199	0.876096	0.987127	0.0329291	0.408945	0.754657
908	2280	RDN25-1	0.0465645	0.630656	0.923739	0.896852	0.963842	0.875419	0.84317	0.995385	0.997597	0.997721	0.995705	0.0946647	0.0309013	0.182745	0.250275	0.38377	0.196839	0.163801	0.697232	0.777454	0.628888	0.592359	0.213342	0.00354841	0.0754095	0.0245734	0.043509	0.0186859	0.0156504	0.541726	0.484498	0.423333	0.430588	0.147407	6.07779e-06	3.68019e-05	0.00955404	0.0445689	0.00297457	0.00167616	0.0498391	0.163585	0.0162519	0.00985449	0.0416731	0.295933	0.665849
908	2281	RDN25-1	0.111199	0.249675	0.763954	0.4272	0.288329	0.462717	0.318736	0.983974	0.891056	0.979865	0.943026	0.0704925	0.10836	0.404693	0.439028	0.227788	0.495732	0.2189	0.832851	0.634137	0.862048	0.666113	0.190606	0.00935434	0.121312	0.044621	0.0236657	0.0481917	0.0201689	0.64174	0.386307	0.592662	0.480481	0.209341	1.04071e-10	1.17e-09	3.76699e-05	5.00083e-05	9.42338e-06	1.8844e-07	0.000383707	0.00070279	9.00533e-05	2.52664e-06	-0.0031308	0.937439	0.97789
908	2288	RDN25-1	0.120652	0.211413	0.732335	0.33522	0.380842	0.279643	0.406012	0.961935	0.898431	0.96429	0.9646	0.0627679	0.15292	0.48019	0.435446	0.552153	0.296581	0.593986	0.832112	0.868047	0.729702	0.891498	0.161602	0.0279785	0.229828	0.0817473	0.115198	0.0543617	0.108247	0.689521	0.62809	0.613144	0.727639	0.141328	1.45636e-05	8.46078e-05	0.00640566	0.0294222	0.000924716	0.00651898	0.03559	0.119149	0.00577234	0.0325083	0.0264939	0.506488	0.813126
908	2314	RDN25-1	0.138382	0.151284	0.64727	0.369306	0.141599	0.29637	0.268572	0.9686	0.786605	0.974793	0.943026	-0.0735274	0.0939507	0.369742	0.0263995	0.376873	0.0331354	0.0415152	0.268344	0.772729	0.280848	0.316426	0.0572987	0.438517	0.797218	0.887281	0.374364	0.754267	0.696023	0.993093	0.821493	0.964961	0.932143	-0.016	0.625296	0.840018	0.165227	0.945555	0.220878	0.272519	0.419127	0.9787	0.47072	0.537011	-0.0196294	0.62261	0.857135
908	2337	RDN25-1	0.198884	0.0381507	0.409054	0.0983049	0.11855	0.100201	0.07762	0.775811	0.778651	0.896011	0.789221	-0.0117727	0.788836	0.935359	0.443819	0.465764	0.362654	0.494025	0.833495	0.818019	0.785054	0.852011	0.0784059	0.288762	0.699918	0.547293	0.597643	0.570083	0.471284	0.946863	0.891035	0.925997	0.90041	0.200009	6.96956e-10	6.9993e-09	9.91857e-05	0.00139293	2.04103e-05	3.20528e-06	0.000906684	0.010735	0.00018121	3.35597e-05	0.0328103	0.410637	0.756015
908	2340	RDN25-1	0.171619	0.0743646	0.527925	0.0799667	0.194721	0.158776	0.0790466	0.743145	0.864404	0.914659	0.789221	-0.0064474	0.883392	0.969571	0.962275	0.517285	0.47269	0.98475	0.987493	0.849641	0.849795	0.99798	0.0289071	0.696096	0.898722	0.642493	0.961092	0.99544	0.661836	0.953659	0.995694	0.999972	0.929523	-0.0357927	0.274499	0.534712	0.547001	0.19465	0.100608	0.435266	0.800767	0.445898	0.284605	0.682505	0.0331312	0.406073	0.753416
908	2347	RDN25-1	-0.0616199	0.524438	0.901809	0.61444	0.370261	0.541907	0.48064	0.99316	0.892843	0.979865	0.967168	0.0261077	0.552501	0.834116	0.511073	0.882279	0.609151	0.745113	0.867048	0.972172	0.899084	0.936022	0.129695	0.078488	0.390543	0.0871882	0.27172	0.100886	0.126346	0.700805	0.762541	0.718301	0.74868	0.0918814	0.0049509	0.0209349	0.0227893	0.283876	0.0211229	0.0346932	0.101509	0.553022	0.0881739	0.125757	0.0351529	0.378018	0.737129
908	2349	RDN25-1	0.0900411	0.351796	0.821103	0.343696	0.302342	0.43434	0.528903	0.961935	0.891056	0.979865	0.968555	0.0113327	0.796552	0.939215	0.714907	0.594403	0.985337	0.76305	0.935933	0.884741	0.993996	0.941453	0.0355245	0.631183	0.87869	0.591212	0.512532	0.750868	0.905175	0.952173	0.879801	0.964961	0.97412	0.114658	0.000446407	0.00223136	0.00554899	0.0103064	0.00831906	0.0219249	0.0315644	0.053634	0.0403367	0.0882157	-0.021219	0.594714	0.848469
908	2351	RDN25-1	0.0735762	0.447055	0.86879	0.449173	0.224268	0.382744	0.415336	0.983998	0.891056	0.979865	0.9646	-0.0647322	0.140451	0.458435	0.266934	0.906904	0.322325	0.258498	0.707881	0.977227	0.755638	0.713155	-0.0561829	0.447499	0.799685	0.531113	0.986831	0.606306	0.55033	0.93919	0.997669	0.936726	0.913492	0.0240434	0.462996	0.716686	0.512718	0.124261	0.319555	0.391422	0.775873	0.334508	0.583187	0.651713	-0.0576088	0.148332	0.489094
908	2416	RDN25-1	0.105063	0.276924	0.793898	0.192259	0.454424	0.240528	0.204663	0.905288	0.912319	0.939331	0.911157	0.104471	0.0171674	0.121854	0.0119769	0.189198	0.0167495	0.00896436	0.171997	0.589319	0.183406	0.129026	0.00134382	0.985516	0.995149	0.698091	0.788639	0.84177	0.750233	0.966079	0.949859	0.967816	0.945617	0.0813975	0.0128312	0.0493786	0.0119579	0.283661	0.0155536	0.00670744	0.0607969	0.553013	0.0682386	0.0333217	0.0245738	0.537792	0.826518
908	2417	RDN25-1	0.185437	0.0535478	0.464142	0.0981411	0.253063	0.0560605	0.0890839	0.775811	0.891056	0.792304	0.790816	0.0317904	0.469452	0.788784	0.760133	0.597955	0.429752	0.724577	0.947055	0.886477	0.824339	0.926085	0.0979269	0.184803	0.593984	0.310211	0.693159	0.18111	0.287124	0.867306	0.925325	0.789876	0.86051	0.182923	1.79714e-08	1.47995e-07	0.000139127	0.0228914	1.22433e-06	1.12754e-05	0.00120271	0.0989452	1.4559e-05	9.91524e-05	0.0639559	0.108491	0.418729
908	2421	RDN25-1	0.140042	0.146393	0.640278	0.260996	0.0974891	0.101912	0.127382	0.944125	0.754229	0.90051	0.843623	0.027833	0.526547	0.816978	0.941866	0.280174	0.279159	0.391934	0.983651	0.686845	0.713785	0.797288	0.0397734	0.590906	0.867651	0.845834	0.368263	0.404743	0.492068	0.989652	0.816015	0.855403	0.90041	0.214682	3.36474e-11	4.01574e-10	1.29702e-05	1.43431e-06	7.64353e-10	2.19403e-09	0.000148199	3.58987e-05	2.28264e-08	4.4697e-08	-0.0381688	0.338447	0.70673
908	2619	RDN25-1	0.0759649	0.432401	0.861143	0.366145	0.388394	0.363222	0.484343	0.966093	0.902702	0.979865	0.968555	-0.0032887	0.940363	0.987332	0.784554	0.820808	0.786789	0.867843	0.953189	0.958846	0.957145	0.966665	-0.0635621	0.390038	0.778658	0.576126	0.591527	0.553637	0.383781	0.947676	0.887706	0.916046	0.890455	0.114331	0.000463637	0.00231047	0.00285215	0.0130533	0.000914454	0.00464412	0.0177198	0.0644295	0.00572187	0.0241678	-0.0171358	0.66747	0.883039
908	2634	RDN25-1	-0.205848	0.0317619	0.376345	0.099966	0.06815	0.0925167	0.0231036	0.776692	0.699995	0.88126	0.595258	-0.0776529	0.0768657	0.328791	0.454017	0.279117	0.41284	0.04144	0.838646	0.684892	0.815104	0.316426	-0.063048	0.393891	0.779752	0.753875	0.552421	0.740905	0.276562	0.984684	0.88379	0.964961	0.856568	-0.0520213	0.112107	0.291462	0.744016	0.446954	0.703632	0.0548474	0.908326	0.70504	0.870477	0.180174	-0.0116361	0.770496	0.927916
908	2640	RDN25-1	0.212426	0.0265826	0.350252	0.124533	0.052816	0.0771623	0.104685	0.816031	0.646813	0.859342	0.797403	0.022525	0.608316	0.862811	0.536801	0.791461	0.800231	0.569874	0.875675	0.949255	0.958216	0.880681	0.148402	0.0438024	0.29047	0.250949	0.0986268	0.148401	0.208314	0.851795	0.591307	0.758751	0.815135	0.184743	1.28944e-08	1.08353e-07	0.00322874	0.000684746	0.000132026	0.000444247	0.0197328	0.00601844	0.000966477	0.00299354	0.00636235	0.873271	0.959491
908	2724	RDN25-1	0.182667	0.0572837	0.471732	0.128012	0.146223	0.0874136	0.108282	0.821265	0.797686	0.88126	0.801142	0.0732049	0.0954053	0.372484	0.381434	0.454978	0.205001	0.289247	0.802582	0.808913	0.635311	0.735888	-0.0425717	0.565038	0.855417	0.399173	0.41762	0.50523	0.417566	0.900743	0.834248	0.895638	0.90041	0.171469	1.34653e-07	9.9898e-07	0.000967108	0.00619565	3.99589e-05	9.10636e-05	0.00675947	0.0353193	0.000328163	0.000689794	0.0276482	0.48814	0.803591
908	2729	RDN25-1	0.111669	0.247665	0.762315	0.176709	0.298875	0.332804	0.335458	0.886505	0.891056	0.979865	0.947939	-0.0535941	0.222439	0.577399	0.640798	0.381808	0.180184	0.16876	0.917777	0.77648	0.60933	0.599327	0.161263	0.0283128	0.231996	0.0191913	0.0602445	0.0588661	0.0589567	0.532883	0.53998	0.630692	0.622241	0.186471	9.37781e-09	8.00272e-08	1.06828e-06	0.000381988	9.83253e-06	6.9125e-06	1.68111e-05	0.00367716	9.35011e-05	6.48788e-05	-0.000173656	0.996526	0.998406
908	2735	RDN25-1	0.101324	0.294471	0.801388	0.315729	0.122368	0.225011	0.514198	0.952625	0.778651	0.939331	0.968555	-0.00517654	0.906258	0.975031	0.96479	0.325045	0.73163	0.411235	0.987493	0.731086	0.942998	0.80478	0.0206105	0.780658	0.92733	0.774308	0.321297	0.587757	0.852494	0.989252	0.780647	0.930686	0.966529	-0.0425047	0.194339	0.423662	0.37225	0.667787	0.609968	0.0452121	0.680529	0.843216	0.817883	0.155403	-0.065255	0.101488	0.404857
908	2791	RDN25-1	-0.122404	0.204808	0.725105	0.507405	0.359344	0.194459	0.310599	0.99193	0.892843	0.925795	0.943026	0.00594483	0.892424	0.971926	0.265236	0.625169	0.942617	0.601213	0.707881	0.895825	0.985339	0.891498	-0.102441	0.165271	0.571372	0.550016	0.362789	0.155701	0.291393	0.94709	0.811176	0.776342	0.86051	0.108456	0.000900406	0.00428604	0.000254145	0.0124869	0.0123203	0.000924287	0.00203626	0.0626293	0.0564072	0.0057972	-0.0239201	0.548666	0.82687
908	2793	RDN25-1	-0.0141436	0.883946	0.979439	0.849451	0.965408	0.915848	0.554145	0.995385	0.997597	0.997721	0.971173	0.0271672	0.536489	0.821187	0.68871	0.549101	0.540528	0.700514	0.9255	0.865812	0.879571	0.919471	0.00510412	0.945027	0.98277	0.99494	0.866591	0.914919	0.602477	0.997978	0.974316	0.986985	0.929523	0.133244	4.40989e-05	0.000244548	0.00392454	0.00695259	0.000537839	0.0235436	0.0233871	0.0388753	0.00351603	0.092902	-0.00945568	0.812611	0.942607
908	2815	RDN25-1	0.209092	0.0291095	0.365135	0.0489313	0.113107	0.0528626	0.0394835	0.714397	0.769123	0.789175	0.686935	-0.0094874	0.82912	0.950134	0.756955	0.409554	0.631512	0.806864	0.945051	0.789996	0.909378	0.952724	0.085717	0.246003	0.65517	0.334756	0.603671	0.366236	0.289344	0.876235	0.89374	0.836691	0.86051	0.179865	3.11665e-08	2.47379e-07	8.73892e-05	0.0080388	2.47071e-05	3.89564e-06	0.000823149	0.0441043	0.000214292	3.95279e-05	0.040911	0.304861	0.674875
908	2826	RDN25-1	0.167783	0.0811766	0.534949	0.137615	0.0619773	0.15437	0.151264	0.83548	0.681491	0.914659	0.865191	0.0274273	0.532594	0.817508	0.81395	0.327772	0.943174	0.932186	0.960892	0.731086	0.985339	0.989812	0.016043	0.828409	0.942837	0.987585	0.576213	0.921127	0.92707	0.996787	0.887706	0.988048	0.978278	0.0231426	0.479928	0.732702	0.850836	0.29612	0.98528	0.997919	0.952395	0.566446	0.994735	0.998334	-0.0323876	0.416696	0.757816
908	2843	RDN25-1	-0.092587	0.338289	0.821103	0.502165	0.0919992	0.444022	0.353109	0.99193	0.751079	0.979865	0.954535	0.0276918	0.528648	0.817016	0.346281	0.313621	0.395748	0.597232	0.779131	0.730224	0.804693	0.891498	0.0264366	0.720941	0.907493	0.545106	0.468258	0.603486	0.753281	0.94516	0.855214	0.93567	0.947188	-0.0169661	0.604563	0.826564	0.89277	0.0456094	0.953561	0.630646	0.963154	0.166938	0.981745	0.825779	0.0890708	0.0252572	0.174269
908	2865	RDN25-1	0.0422072	0.663003	0.935303	0.225434	0.634292	0.545404	0.684361	0.920972	0.947497	0.983595	0.981654	0.0511768	0.244033	0.600019	0.0119543	0.323074	0.155947	0.305724	0.171997	0.731086	0.574875	0.750179	0.0556781	0.451597	0.802463	0.0870416	0.453763	0.341438	0.485443	0.700805	0.849793	0.836691	0.90041	0.0346871	0.289606	0.552701	0.00767802	0.40899	0.171787	0.38321	0.0420372	0.678124	0.404008	0.644323	-0.00919509	0.817684	0.942859
908	2870	RDN25-1	0.0501162	0.604792	0.915885	0.411808	0.867595	0.658857	0.478914	0.978595	0.995518	0.995892	0.967168	0.000270775	0.995085	0.999449	0.508414	0.602258	0.923588	0.651576	0.867048	0.888537	0.985339	0.908404	0.0443566	0.548825	0.849944	0.329105	0.887594	0.619149	0.39934	0.868392	0.980771	0.940295	0.898865	-0.0151816	0.643095	0.84984	0.651298	0.373456	0.610178	0.861795	0.862707	0.644652	0.817883	0.946498	0.0321236	0.420506	0.759401
908	2880	RDN25-1	0.0948987	0.326314	0.817397	0.152566	0.232006	0.39957	0.354919	0.849015	0.891056	0.979865	0.954535	0.026686	0.543733	0.82881	0.134692	0.320638	0.724659	0.60122	0.550498	0.731086	0.942318	0.891498	-0.0371138	0.615982	0.875329	0.838424	0.971456	0.558841	0.628198	0.989652	0.996242	0.920773	0.929523	0.00808056	0.805197	0.923444	0.164718	0.428317	0.979017	0.854955	0.41826	0.685934	0.992614	0.944878	-0.0340164	0.39364	0.744101
908	2921	RDN25-1	0.132182	0.170645	0.669171	0.487658	0.257271	0.274152	0.268471	0.99193	0.891056	0.964148	0.943026	0.0991134	0.023805	0.153152	0.47132	0.145695	0.116897	0.107559	0.847972	0.530738	0.512863	0.492641	-0.0311922	0.6734	0.891616	0.260466	0.630526	0.507483	0.513063	0.851948	0.906468	0.895638	0.905526	0.0223089	0.495895	0.74567	0.388764	0.823959	0.978463	0.958145	0.687994	0.928818	0.992435	0.987127	0.0104854	0.792646	0.935151
908	2922	RDN25-1	0.132182	0.170645	0.669171	0.416313	0.304921	0.177619	0.224582	0.978595	0.891056	0.914659	0.931423	0.0556232	0.205394	0.556846	0.89112	0.582234	0.22551	0.345694	0.97893	0.882211	0.657758	0.784408	0.077616	0.293662	0.700959	0.718307	0.52025	0.296899	0.384231	0.969565	0.883318	0.820226	0.890455	0.00951982	0.771391	0.911719	0.383574	0.813743	0.718908	0.99532	0.68525	0.923144	0.874671	0.997598	0.0220421	0.580496	0.844965
908	2923	RDN25-1	-0.0254389	0.792882	0.954673	0.442747	0.514976	0.505573	0.781485	0.983998	0.929344	0.979865	0.98932	0.0531488	0.22631	0.583352	0.980924	0.892644	0.831232	0.305619	0.991488	0.973332	0.962836	0.750179	-0.0843772	0.25349	0.664277	0.0885704	0.135063	0.108085	0.266879	0.701093	0.63839	0.729334	0.85013	0.00813042	0.804019	0.923123	0.297836	0.488618	0.385613	0.890872	0.599622	0.738712	0.646075	0.956768	0.0449172	0.259895	0.635748
908	2944	RDN25-1	0.0666751	0.490918	0.889035	0.77824	0.600614	0.812351	0.593417	0.995385	0.941893	0.997721	0.978758	0.0762299	0.0824484	0.339481	0.469297	0.278908	0.497235	0.193467	0.847789	0.684892	0.863163	0.644835	-0.105607	0.152522	0.549681	0.0789665	0.180103	0.0605184	0.132442	0.687166	0.705579	0.6413	0.75067	-0.0144013	0.660257	0.859979	0.244212	0.643856	0.151562	0.489999	0.533491	0.833011	0.373646	0.721006	0.010176	0.798631	0.937408
908	2946	RDN25-1	0.164973	0.0864781	0.547806	0.0646703	0.106358	0.129948	0.123574	0.740846	0.757754	0.912294	0.838923	0.0566125	0.197436	0.548151	0.12483	0.289557	0.368149	0.33943	0.536033	0.700051	0.787893	0.781275	-0.108447	0.141731	0.53113	0.309555	0.244856	0.12728	0.131971	0.867306	0.744496	0.734505	0.75067	0.180097	2.98987e-08	2.3789e-07	2.9967e-06	0.000347696	1.78606e-05	9.02864e-06	4.05944e-05	0.00342227	0.000160462	8.21013e-05	-0.00808053	0.839462	0.947956
908	2948	RDN25-1	0.150991	0.117064	0.602415	0.0853429	0.188379	0.168723	0.151771	0.750669	0.860098	0.914659	0.865191	0.0381442	0.38537	0.726207	0.225745	0.644447	0.593573	0.515841	0.674924	0.907614	0.899084	0.861813	-0.182415	0.0129483	0.142884	0.0538027	0.0248811	0.013237	0.015401	0.646776	0.392978	0.387071	0.430588	0.226713	2.36827e-12	3.26405e-11	7.10706e-09	3.28608e-05	3.36101e-08	7.41576e-09	2.55854e-07	0.000502082	5.73555e-07	1.35338e-07	0.00994656	0.803078	0.940398
908	2959	RDN25-1	-0.0206602	0.831143	0.96222	0.807022	0.528607	0.985421	0.799815	0.995385	0.929344	0.999493	0.98932	0.0581076	0.18584	0.531778	0.32091	0.860919	0.105631	0.281194	0.765988	0.967482	0.491304	0.729099	-0.0748155	0.311479	0.717832	0.32888	0.15783	0.507627	0.308692	0.868392	0.673686	0.895638	0.864274	0.160238	8.5501e-07	5.63281e-06	0.000426905	0.0317549	3.49386e-06	5.60281e-05	0.00326136	0.125967	3.7477e-05	0.000440844	0.0474253	0.234196	0.615692
908	2975	RDN25-1	0.0970771	0.31528	0.806901	0.3033	0.886948	0.284695	0.224112	0.952625	0.997597	0.96429	0.931423	-0.0810107	0.0649043	0.300201	0.184581	0.0015136	0.164825	0.265479	0.626718	0.0401793	0.588534	0.715568	0.126096	0.0872092	0.415727	0.0944076	0.871517	0.079663	0.0516117	0.714854	0.974316	0.697377	0.597513	0.055163	0.0920108	0.248023	0.144153	0.279164	0.0907994	0.0355664	0.381549	0.547903	0.26484	0.128391	0.112278	0.00474672	0.0592261
960	966	RDN25-1	0.0599996	0.535422	0.901809	0.784646	0.37052	0.8686	0.677017	0.995385	0.892843	0.997721	0.981654	0.132529	0.00246005	0.0271926	0.0587098	0.00541325	0.0706986	0.0187194	0.401484	0.0906117	0.396154	0.208451	-0.0112099	0.879626	0.961663	0.59997	0.768324	0.491927	0.71379	0.952173	0.946627	0.895638	0.935384	0.0459357	0.1607	0.373097	0.747182	0.119773	0.943812	0.465984	0.909133	0.324835	0.981693	0.707455	-0.0367247	0.357053	0.719793
960	986	RDN25-1	0.026542	0.784115	0.954043	0.759715	0.360434	0.775346	0.838383	0.995385	0.892843	0.997721	0.994181	0.291873	1.13639e-11	1.24532e-09	6.72264e-06	0.00416469	9.08184e-07	2.05572e-09	0.000679504	0.0754815	0.000113653	4.15571e-07	0.0356695	0.629789	0.87869	0.780896	0.300512	0.800267	0.703948	0.989652	0.766773	0.965422	0.932143	0.0442596	0.176539	0.396671	0.751328	0.127001	0.773663	0.321396	0.911584	0.340315	0.905277	0.596489	0.124766	0.00168862	0.0288331
960	990	RDN25-1	0.195784	0.0413235	0.419586	0.0608962	0.947634	0.132052	0.114875	0.734107	0.997597	0.912294	0.824829	0.186098	1.94744e-05	0.000499084	0.000579518	0.961486	0.0039333	0.00221812	0.0223967	0.991533	0.0771396	0.0565942	0.0349507	0.636711	0.879381	0.697018	0.0713713	0.904262	0.971356	0.965611	0.55004	0.985113	0.98787	-0.0203401	0.534696	0.775682	0.597425	6.89552e-05	0.102449	0.134424	0.826972	0.000890004	0.288261	0.350149	0.188946	1.75306e-06	0.000144364
960	1004	RDN25-1	-0.0818889	0.397267	0.843013	0.275274	0.140359	0.269656	0.368629	0.944125	0.786605	0.958941	0.956928	0.204651	2.53351e-06	8.87807e-05	0.00106673	0.0331442	0.00039025	5.64917e-05	0.0340464	0.260009	0.0153071	0.00309292	-0.0373734	0.613514	0.874681	0.39861	0.185624	0.389511	0.551485	0.900743	0.705579	0.850737	0.913492	-0.000832064	0.97974	0.994228	0.467229	0.141501	0.426992	0.790632	0.748706	0.368547	0.685901	0.917334	0.0771779	0.0526558	0.277517
960	1042	RDN25-1	0.0315453	0.744707	0.945193	0.789813	0.105489	0.886344	0.792336	0.995385	0.757754	0.997721	0.98932	0.187999	1.59417e-05	0.000433984	0.000528288	0.78973	0.000510971	0.000162499	0.0214473	0.949187	0.0181464	0.00737815	-0.0190501	0.796888	0.931331	0.779605	0.00923789	0.649086	0.762359	0.989652	0.247089	0.945817	0.948645	-0.0229987	0.482664	0.735041	0.54722	1.57387e-05	0.314133	0.474924	0.800767	0.000275742	0.580142	0.711168	0.203677	2.46478e-07	2.61903e-05
960	1052	RDN25-1	0.00690736	0.943171	0.994477	0.984169	0.421512	0.836821	0.943014	0.996965	0.908276	0.997721	0.995705	0.2296	1.19682e-07	6.15988e-06	2.93479e-05	0.0220702	3.67875e-05	1.94032e-06	0.0021424	0.210964	0.00230184	0.000188858	-0.0781966	0.290055	0.699918	0.284864	0.0469918	0.179124	0.321736	0.867306	0.493978	0.789876	0.864274	-0.0350108	0.285126	0.545733	0.323066	0.0153813	0.112635	0.372239	0.628894	0.072713	0.30706	0.637539	0.0935327	0.0187729	0.14482
960	1056	RDN25-1	-0.0826843	0.392683	0.843013	0.447197	0.298952	0.291831	0.497413	0.983998	0.891056	0.971782	0.968555	0.187075	1.75754e-05	0.000468982	0.000333276	0.00892192	0.000973549	3.65722e-05	0.0153658	0.121486	0.0282955	0.00218436	0.00455126	0.950973	0.986616	0.919305	0.774175	0.797865	0.815883	0.996787	0.947044	0.965422	0.963226	0.0133382	0.68393	0.871852	0.7016	0.7623	0.772461	0.4851	0.886621	0.895349	0.905051	0.718143	0.0294107	0.460829	0.786106
960	1110	RDN25-1	0.162718	0.0909265	0.555373	0.12863	0.644488	0.0958579	0.0898228	0.822483	0.947996	0.895656	0.790816	0.0543339	0.216111	0.572703	0.367862	0.327194	0.226352	0.20067	0.793357	0.731086	0.658507	0.648963	-0.030637	0.678888	0.892754	0.654095	0.0944728	0.754962	0.779017	0.955594	0.584175	0.964961	0.953502	0.0548121	0.094101	0.252623	0.27186	0.263671	0.125491	0.102416	0.567472	0.531513	0.327297	0.285626	0.113797	0.00420736	0.0545632
960	1124	RDN25-1	-0.163764	0.0888419	0.552161	0.0768344	0.330491	0.0393305	0.123859	0.743145	0.892077	0.683053	0.838923	0.19564	6.98821e-06	0.000217162	0.000865658	2.40294e-05	0.00216846	2.63645e-05	0.029166	0.00203708	0.0504812	0.0016899	0.060406	0.414049	0.78964	0.61147	0.164347	0.847625	0.380391	0.952173	0.687747	0.967816	0.890455	0.0255558	0.43533	0.696444	0.882829	0.107344	0.619445	0.379691	0.961091	0.298834	0.823421	0.64293	-0.0599745	0.132347	0.459381
960	1133	RDN25-1	-0.16333	0.0897027	0.554373	0.243739	0.0652817	0.0620928	0.102809	0.925971	0.688314	0.813957	0.796129	-0.0354381	0.42	0.75394	0.882309	0.252725	0.219453	0.454738	0.977543	0.660857	0.653274	0.825882	0.0591504	0.423838	0.79104	0.208789	0.775283	0.672693	0.461931	0.827684	0.947044	0.954313	0.90041	0.0416134	0.203867	0.43834	0.0561004	0.892862	0.689747	0.299225	0.201072	0.956276	0.861528	0.571749	0.0344635	0.387449	0.739431
960	1437	RDN25-1	0.0228215	0.813784	0.95822	0.957728	0.956151	0.853716	0.914328	0.996965	0.997597	0.997721	0.995705	0.0649407	0.139174	0.455704	0.375004	0.430962	0.639365	0.279845	0.797109	0.797583	0.913677	0.72743	0.0442846	0.549475	0.850551	0.740842	0.751617	0.973269	0.680169	0.978407	0.93968	0.996912	0.930667	0.0773178	0.0181122	0.0665866	0.176603	0.254413	0.36698	0.0911844	0.437843	0.521933	0.628916	0.263869	0.0168795	0.672151	0.883351
960	1449	RDN25-1	0.0282079	0.770928	0.954043	0.84887	0.648083	0.930947	0.882947	0.995385	0.947996	0.997721	0.995705	0.0388261	0.376926	0.718015	0.571086	0.326627	0.971568	0.602459	0.886189	0.731086	0.991557	0.891498	-0.0723955	0.327433	0.72848	0.321863	0.553208	0.166061	0.275936	0.868392	0.88379	0.778705	0.856568	0.0683585	0.0367278	0.121589	0.177128	0.0919438	0.428964	0.154897	0.438731	0.270679	0.687603	0.382773	-0.021126	0.596329	0.848469
960	1450	RDN25-1	0.02575	0.790407	0.954673	0.77904	0.585624	0.923366	0.950703	0.995385	0.941893	0.997721	0.995705	0.0388218	0.37698	0.718015	0.43168	0.453259	0.645933	0.693597	0.828395	0.808118	0.914701	0.917676	-0.0146731	0.842862	0.948606	0.890782	0.251585	0.698946	0.664493	0.993093	0.746658	0.964131	0.929548	0.0762945	0.0197036	0.072035	0.0727208	0.876632	0.127383	0.142308	0.241912	0.949464	0.330466	0.363093	0.0844944	0.0338325	0.209482
960	1888	RDN25-1	-0.0719504	0.457186	0.870707	0.411889	0.341838	0.46349	0.526396	0.978595	0.892077	0.979865	0.968555	-0.0707891	0.10688	0.401438	0.117197	0.0965776	0.139325	0.197862	0.527229	0.435957	0.557435	0.646389	0.055949	0.449396	0.800394	0.601613	0.770192	0.501488	0.419241	0.952173	0.947017	0.895638	0.90041	0.0410323	0.210259	0.447411	0.534154	0.845394	0.335446	0.21062	0.792636	0.936634	0.597663	0.461849	0.0306788	0.441718	0.772823
960	2129	RDN25-1	0.0780533	0.419818	0.854855	0.508474	0.972883	0.360515	0.438304	0.99193	0.997597	0.979865	0.9646	0.195464	7.1248e-06	0.000219337	0.000453663	0.0575245	1.91059e-05	5.35283e-05	0.0198704	0.340483	0.00135704	0.00299303	-0.00253781	0.972651	0.993816	0.884184	0.330019	0.872834	0.981506	0.993093	0.784787	0.976062	0.992839	0.0315986	0.334723	0.602172	0.617246	0.344294	0.238277	0.405258	0.84135	0.617264	0.492677	0.66302	0.0817049	0.0401924	0.234325
960	2133	RDN25-1	0.0505727	0.601502	0.913866	0.637384	0.914938	0.539241	0.747934	0.99316	0.997597	0.979865	0.986153	0.185742	2.02135e-05	0.000510115	0.00053091	0.0149072	6.05296e-05	0.000547461	0.0214473	0.171149	0.00353493	0.0195849	0.0161557	0.827221	0.942534	0.85785	0.791515	0.720939	0.982426	0.989652	0.951556	0.964961	0.993388	-0.0311341	0.34188	0.609786	0.463036	0.186613	0.631535	0.206736	0.744298	0.433998	0.830252	0.457324	0.0390485	0.327424	0.698238
960	2142	RDN25-1	-0.0192683	0.842367	0.965895	0.909704	0.974525	0.979153	0.906083	0.995385	0.997597	0.999477	0.995705	0.0353264	0.421467	0.755323	0.426266	0.402734	0.297656	0.386535	0.825496	0.788679	0.729702	0.796528	0.0447612	0.545182	0.848849	0.522251	0.484368	0.437833	0.5084	0.93919	0.863304	0.869504	0.903493	0.0409505	0.211171	0.448483	0.276691	0.285419	0.146939	0.214286	0.573458	0.554793	0.364707	0.465782	-0.0158169	0.691696	0.895616
960	2191	RDN25-1	-0.0899259	0.352415	0.821103	0.393017	0.471412	0.359367	0.531642	0.975984	0.919699	0.979865	0.968555	0.107714	0.0139904	0.106185	0.0420813	0.0488443	0.0358539	0.00621387	0.354454	0.320907	0.296302	0.105471	0.0860988	0.243898	0.65517	0.283738	0.255171	0.295125	0.151833	0.867306	0.750099	0.820226	0.772356	0.0464212	0.156319	0.367455	0.284269	0.269014	0.278859	0.0604067	0.58346	0.536802	0.539647	0.19289	-0.0123095	0.757619	0.924976
960	2197	RDN25-1	0.00108005	0.991107	0.997128	0.841736	0.366971	0.884295	0.977139	0.995385	0.892843	0.997721	0.995705	0.103371	0.01838	0.128	0.0217461	0.933151	0.0783521	0.0426039	0.24321	0.987197	0.420223	0.318879	0.0127567	0.863169	0.956098	0.6909	0.321891	0.967844	0.91138	0.964763	0.780647	0.99555	0.976414	0.0107126	0.743696	0.900307	0.494394	0.0982568	0.895091	0.862729	0.766444	0.281882	0.961818	0.946889	0.0982948	0.0135028	0.119551
960	2220	RDN25-1	0.0801649	0.407313	0.849708	0.559	0.527509	0.334504	0.346958	0.99316	0.929344	0.979865	0.954535	-0.0360616	0.411863	0.751205	0.301669	0.431367	0.720872	0.674787	0.740922	0.797771	0.941837	0.916689	-0.0232711	0.753204	0.919251	0.600493	0.683743	0.949439	0.920658	0.952173	0.922555	0.992802	0.977711	0.0309049	0.345447	0.611448	0.797474	0.722452	0.215434	0.23268	0.930623	0.87574	0.464066	0.492085	0.012031	0.762937	0.925813
960	2256	RDN25-1	0.00287273	0.976349	0.996313	0.723783	0.955817	0.753537	0.948426	0.995385	0.997597	0.997721	0.995705	0.18021	3.57398e-05	0.000813128	5.88416e-05	0.00458172	0.00315256	0.000445692	0.00368181	0.0808104	0.0657535	0.0172247	0.00278541	0.969984	0.9932	0.652992	0.944103	0.68439	0.932417	0.955594	0.993943	0.957881	0.978278	0.019733	0.546962	0.786078	0.228103	0.837947	0.701517	0.791322	0.513671	0.934031	0.870477	0.917334	0.00886215	0.824176	0.945029
960	2258	RDN25-1	0.00287273	0.976349	0.996313	0.932532	0.996161	0.948214	0.956309	0.995385	0.999839	0.998279	0.995705	0.130709	0.00282399	0.030202	0.010647	0.0347154	0.00670164	0.00638487	0.162677	0.267381	0.110703	0.105531	0.0717451	0.331809	0.733066	0.340645	0.422521	0.33917	0.34335	0.877661	0.834248	0.836691	0.885001	0.0243214	0.457839	0.713106	0.496616	0.679378	0.47918	0.486395	0.767338	0.848124	0.726651	0.718709	0.00235261	0.952968	0.982405
960	2260	RDN25-1	0.0433419	0.654517	0.932338	0.749636	0.734134	0.635895	0.68726	0.995385	0.965053	0.995892	0.981654	0.13734	0.00169413	0.0201647	0.252097	0.341752	0.00408524	0.00575668	0.699365	0.744831	0.0789413	0.10222	0.135575	0.0657645	0.359854	0.463866	0.515758	0.0739134	0.0885383	0.912592	0.881303	0.678334	0.69463	-0.00593479	0.856262	0.948668	0.0637869	0.105656	0.981194	0.83059	0.219413	0.295971	0.9944	0.930431	0.079916	0.0447819	0.248336
960	2264	RDN25-1	0.199117	0.0379205	0.409054	0.213821	0.0294589	0.0558063	0.170753	0.918174	0.577746	0.792304	0.880117	0.173657	6.87025e-05	0.00137991	0.0553745	0.000629682	0.000702072	0.0214898	0.397575	0.0239827	0.0230631	0.225901	-0.0553219	0.454501	0.80534	0.117744	0.801378	0.434782	0.134765	0.760271	0.954958	0.869408	0.752226	0.0481419	0.141517	0.343773	0.587054	0.124108	0.292838	0.715674	0.824339	0.334508	0.558879	0.877122	-0.0335622	0.399991	0.748969
960	2266	RDN25-1	-0.0381365	0.693796	0.937818	0.819293	0.219158	0.813857	0.34819	0.995385	0.891056	0.997721	0.954535	0.282552	5.31465e-11	5.30498e-09	1.46202e-08	0.00136535	1.01853e-09	2.15845e-06	2.95552e-06	0.0381716	2.23058e-07	0.000202586	0.0847801	0.251222	0.661558	0.223741	0.910855	0.210496	0.725722	0.832848	0.986697	0.795318	0.937588	0.0727205	0.0262558	0.0918853	0.050142	0.681234	0.028491	0.690287	0.186523	0.848124	0.112424	0.86361	0.094406	0.0176897	0.139005
960	2278	RDN25-1	0.0758073	0.43336	0.862009	0.43876	0.605979	0.340575	0.453186	0.983998	0.941893	0.979865	0.9646	-0.0616888	0.160118	0.488112	0.288601	0.180107	0.418415	0.212469	0.730745	0.58244	0.816971	0.665881	0.178223	0.0152187	0.157514	0.0236125	0.0649543	0.0108583	0.0217623	0.541726	0.546739	0.383768	0.480481	0.00621875	0.849465	0.944816	0.806681	0.79275	0.486398	0.864018	0.933725	0.910728	0.732944	0.946889	0.0201846	0.612803	0.852919
960	2280	RDN25-1	0.0380154	0.69472	0.937818	0.823949	0.622088	0.810643	0.984198	0.995385	0.944453	0.997721	0.995836	-0.0473538	0.281106	0.633246	0.0435431	0.0232867	0.221713	0.0899875	0.358566	0.216172	0.655412	0.462047	0.15746	0.0323108	0.249255	0.232093	0.436368	0.0664594	0.118789	0.836055	0.841498	0.674345	0.745054	0.0650973	0.0467108	0.147805	0.92861	0.623062	0.193339	0.452553	0.974735	0.821433	0.437259	0.697542	0.0910676	0.0221484	0.161053
960	2281	RDN25-1	0.103214	0.285512	0.799046	0.292096	0.13664	0.411297	0.304012	0.952625	0.786605	0.979865	0.943026	-0.00968488	0.82562	0.948584	0.947255	0.435812	0.556472	0.861246	0.984916	0.799545	0.887658	0.964197	0.121608	0.0991567	0.450513	0.116032	0.0383099	0.194902	0.117192	0.760271	0.466858	0.790649	0.74448	0.0720738	0.0276236	0.0960845	0.0785583	0.0148341	0.18552	0.0591572	0.253937	0.0712686	0.424692	0.190066	-0.0572684	0.150748	0.491648
960	2288	RDN25-1	0.133448	0.166552	0.664192	0.285758	0.443627	0.229337	0.186913	0.952625	0.911332	0.939331	0.896365	0.0349629	0.426264	0.759802	0.825093	0.787894	0.637008	0.475244	0.964052	0.948085	0.911758	0.839343	-0.0336686	0.649133	0.883145	0.48693	0.326123	0.568502	0.670027	0.924568	0.783765	0.925464	0.929548	0.0355034	0.278399	0.538805	0.780108	0.764764	0.544164	0.358456	0.924729	0.895349	0.776693	0.623334	0.0513815	0.197405	0.564945
960	2314	RDN25-1	-0.0596732	0.537648	0.903104	0.371146	0.442065	0.428339	0.743142	0.96983	0.911332	0.979865	0.986029	0.0941861	0.0317631	0.186835	0.256226	0.244844	0.141673	0.0140327	0.700299	0.651264	0.558838	0.175316	-0.0769769	0.297667	0.706933	0.175932	0.246278	0.214124	0.518987	0.803037	0.744785	0.79846	0.905631	-0.0406912	0.214078	0.453196	0.0960698	0.228116	0.118987	0.711963	0.288002	0.486598	0.317783	0.874318	0.0233573	0.558114	0.833755
960	2337	RDN25-1	0.0676345	0.484686	0.885354	0.712548	0.293661	0.543866	0.463877	0.995385	0.891056	0.982323	0.9646	0.0255147	0.561564	0.839671	0.942936	0.243471	0.691478	0.510506	0.983651	0.650907	0.927145	0.860037	-0.0325167	0.660377	0.887146	0.448436	0.878375	0.628764	0.744233	0.912525	0.977295	0.942067	0.945109	0.0436731	0.182348	0.405574	0.747579	0.0923146	0.338756	0.193029	0.909133	0.271109	0.600733	0.440879	-0.0457595	0.251056	0.626765
960	2340	RDN25-1	-0.0819056	0.397171	0.843013	0.164261	0.286761	0.506606	0.415087	0.869571	0.891056	0.979865	0.9646	0.186766	1.81558e-05	0.000478442	0.018953	0.0107726	4.6061e-05	0.000131666	0.223357	0.134825	0.0027511	0.00640775	0.0711751	0.335675	0.736161	0.916645	0.659234	0.279707	0.371079	0.996787	0.916931	0.818652	0.890455	0.00933782	0.775643	0.914338	0.230308	0.65524	0.552518	0.828016	0.517307	0.839985	0.78228	0.928735	0.0330637	0.407031	0.754083
960	2347	RDN25-1	0.0226576	0.815098	0.95822	0.636282	0.662026	0.795116	0.704855	0.99316	0.948823	0.997721	0.981654	0.0214438	0.625639	0.871397	0.371963	0.427904	0.611755	0.447621	0.794731	0.796419	0.899084	0.824929	0.121042	0.100748	0.45461	0.0695005	0.550684	0.112714	0.0805108	0.664172	0.88379	0.729436	0.682524	0.0177101	0.588809	0.816048	0.319811	0.326109	0.586695	0.386642	0.626277	0.597833	0.804644	0.647393	0.0698047	0.0797505	0.35596
960	2349	RDN25-1	-0.0108223	0.91107	0.985618	0.922015	0.727696	0.666951	0.898653	0.995385	0.964757	0.995892	0.995705	0.0145966	0.739835	0.913273	0.777158	0.841549	0.710033	0.800192	0.950203	0.966182	0.935435	0.949393	-0.0338818	0.64706	0.882975	0.683727	0.483606	0.396893	0.646986	0.961125	0.862808	0.853057	0.929523	-0.0464279	0.156259	0.367455	0.303309	0.168081	0.0449236	0.210714	0.608006	0.408171	0.159972	0.461849	0.026814	0.501363	0.810349
960	2351	RDN25-1	-0.0245614	0.799874	0.957799	0.85136	0.391155	0.740858	0.849382	0.995385	0.903406	0.997721	0.995705	0.159848	0.000252329	0.00421915	0.00199558	0.127872	0.0023045	0.00071506	0.0519245	0.497499	0.05111	0.0238788	-0.0112626	0.879065	0.961663	0.939383	0.359591	0.79574	0.938872	0.996787	0.811007	0.965422	0.980276	0.0304131	0.353181	0.619879	0.425594	0.47803	0.593254	0.358645	0.720658	0.730386	0.807174	0.623334	0.068036	0.0877042	0.37093
960	2416	RDN25-1	0.0469642	0.627722	0.923362	0.815445	0.868813	0.377451	0.509941	0.995385	0.995743	0.979865	0.968555	0.127328	0.00363311	0.036823	0.050246	0.105824	0.000598029	0.00260359	0.38947	0.457409	0.0198939	0.0631825	-0.0981264	0.183905	0.593399	0.137955	0.141008	0.484848	0.319526	0.776331	0.6479	0.893558	0.864274	0.0782687	0.0167354	0.0621494	0.21065	0.353896	0.00218873	0.0111792	0.487314	0.629058	0.0123169	0.0515422	0.0291343	0.465055	0.787605
960	2417	RDN25-1	-0.110282	0.253623	0.769276	0.335803	0.112056	0.240548	0.201085	0.961935	0.768882	0.939331	0.909553	0.086417	0.0488895	0.254159	0.070982	0.67572	0.120364	0.172075	0.429707	0.920051	0.521976	0.602587	0.234427	0.00131896	0.0396583	0.0022592	0.040214	0.00369711	0.00530473	0.260686	0.473912	0.335035	0.325313	0.0029347	0.92863	0.975417	0.762781	0.27428	0.875247	0.670543	0.916173	0.541146	0.957249	0.848838	0.0609815	0.125961	0.44946
960	2421	RDN25-1	-0.0863547	0.371941	0.831753	0.261761	0.127372	0.39376	0.292043	0.944125	0.781429	0.979865	0.943026	0.0230922	0.599315	0.859083	0.893579	0.36702	0.6513	0.961552	0.97893	0.768452	0.914854	0.995041	0.163049	0.0265866	0.224555	0.100234	0.319574	0.0382561	0.0676902	0.728992	0.779797	0.564815	0.646328	0.060959	0.0625707	0.18337	0.489927	0.746087	0.127607	0.299302	0.763206	0.889964	0.330721	0.571749	0.0780902	0.0499131	0.26715
960	2619	RDN25-1	0.0800696	0.407873	0.850163	0.556331	0.470818	0.322501	0.334506	0.99316	0.919699	0.97977	0.947325	0.0125624	0.775039	0.930334	0.905068	0.866403	0.503133	0.533956	0.979565	0.967482	0.863641	0.866939	0.0572494	0.438911	0.797218	0.638763	0.525446	0.323375	0.33838	0.953659	0.883318	0.836691	0.883561	0.00352494	0.914326	0.970124	0.728525	0.98128	0.539494	0.578809	0.900124	0.994141	0.773903	0.794313	0.00227746	0.954469	0.982405
960	2634	RDN25-1	-0.0159499	0.869249	0.974908	0.905352	0.104091	0.85645	0.59307	0.995385	0.757754	0.997721	0.978758	0.047808	0.276512	0.626431	0.339233	0.0671704	0.363565	0.84882	0.777591	0.368696	0.785709	0.963059	0.219345	0.00270151	0.0609504	0.00553382	0.465867	0.00533905	0.0190621	0.321497	0.855214	0.35243	0.479773	0.0650433	0.0468939	0.148242	0.12282	0.0750866	0.114754	0.492285	0.341195	0.233248	0.31058	0.722751	0.158419	6.42009e-05	0.00254672
960	2640	RDN25-1	0.109525	0.25692	0.775793	0.395733	0.559839	0.301085	0.316208	0.976113	0.936444	0.975159	0.943026	-0.0430497	0.327197	0.677161	0.229804	0.140996	0.341962	0.300077	0.682401	0.519297	0.766345	0.744531	0.0414173	0.575645	0.859332	0.807341	0.949517	0.638969	0.669991	0.989652	0.994552	0.943986	0.929548	0.0426922	0.192376	0.421054	0.634135	0.936879	0.333359	0.369991	0.853475	0.975097	0.595964	0.635099	0.046894	0.239485	0.618342
960	2724	RDN25-1	-0.143414	0.136823	0.631274	0.340079	0.0564966	0.209532	0.118441	0.961935	0.651198	0.935424	0.830059	0.0423285	0.335373	0.683613	0.104177	0.750722	0.240293	0.572438	0.504892	0.93594	0.673474	0.880681	0.113027	0.125566	0.500743	0.0521439	0.550576	0.101131	0.20876	0.64174	0.88379	0.718301	0.815135	0.0240519	0.462839	0.716686	0.120568	0.478005	0.310381	0.807338	0.337436	0.730386	0.576046	0.920207	0.061699	0.121559	0.443837
960	2729	RDN25-1	0.0293237	0.762131	0.951156	0.753636	0.933443	0.993299	0.687002	0.995385	0.997597	0.999984	0.981654	0.0312768	0.476664	0.791692	0.519681	0.907893	0.982453	0.382224	0.867048	0.977227	0.993212	0.793782	-0.0356834	0.629657	0.87869	0.692002	0.392842	0.405025	0.760405	0.965611	0.834248	0.855403	0.948148	0.0814477	0.0127757	0.0493353	0.0563205	0.415732	0.195027	0.016258	0.201101	0.67942	0.438523	0.0699282	0.038342	0.336259	0.70673
960	2735	RDN25-1	-0.0471323	0.62649	0.923223	0.545108	0.857271	0.855203	0.352455	0.99193	0.995518	0.997721	0.954535	0.189275	1.39219e-05	0.000398772	0.00108824	0.000334561	1.01794e-05	0.00340558	0.0340464	0.0145055	0.000835985	0.0745822	0.0591242	0.424044	0.79104	0.595526	0.315946	0.267625	0.882085	0.952173	0.778898	0.815631	0.970571	0.0489109	0.13526	0.332994	0.457176	0.149247	0.0509677	0.970625	0.740271	0.37969	0.173952	0.990904	-0.0277166	0.487064	0.802997
960	2791	RDN25-1	0.0615801	0.524707	0.901809	0.831435	0.868534	0.449888	0.386879	0.995385	0.995743	0.979865	0.963664	-0.0178158	0.685245	0.889427	0.286754	0.313836	0.963509	0.860608	0.730221	0.730224	0.991339	0.964197	0.097565	0.186439	0.597403	0.47462	0.532406	0.151781	0.114153	0.922066	0.883318	0.765604	0.738899	0.0634339	0.0526251	0.162614	0.589452	0.710195	0.0464178	0.0205168	0.824339	0.864471	0.16374	0.0832069	0.0437357	0.272653	0.648597
960	2793	RDN25-1	0.0519373	0.591715	0.910799	0.609293	0.496596	0.648432	0.557552	0.99316	0.922384	0.995892	0.972322	0.0105864	0.809684	0.945159	0.826039	0.599545	0.917237	0.709512	0.964052	0.887665	0.985339	0.921743	-0.0660357	0.371819	0.761235	0.426783	0.606711	0.365968	0.458109	0.91052	0.895735	0.836691	0.90041	0.0560975	0.0866255	0.236212	0.197395	0.144022	0.20105	0.0999243	0.469404	0.370706	0.44625	0.280746	-0.0215121	0.589633	0.847229
960	2815	RDN25-1	-0.0543099	0.574873	0.908626	0.365116	0.0816102	0.660379	0.750901	0.965316	0.730096	0.995892	0.986501	0.00224161	0.959331	0.99218	0.483387	0.0312868	0.814276	0.621642	0.850295	0.251443	0.958216	0.896772	0.205131	0.00509417	0.0902161	0.0394931	0.392068	0.00597002	0.0034561	0.616594	0.833971	0.35243	0.302754	0.0704435	0.0313466	0.106669	0.491735	0.233483	0.0437732	0.017113	0.764335	0.493241	0.15709	0.0728898	0.133108	0.000802512	0.0168586
960	2826	RDN25-1	0.0782112	0.418875	0.854855	0.75369	0.679893	0.432359	0.554102	0.995385	0.948917	0.979865	0.971173	0.188974	1.43753e-05	0.000404719	0.00681023	0.00998997	0.00010791	0.000431996	0.120928	0.128067	0.00545361	0.0169446	0.0801131	0.278359	0.691404	0.671872	0.59144	0.299314	0.429631	0.959472	0.887706	0.820226	0.90041	0.0280243	0.392284	0.657599	0.691566	0.914139	0.451691	0.798659	0.881526	0.965966	0.704896	0.918384	0.033751	0.397343	0.745968
960	2843	RDN25-1	-0.0827002	0.392592	0.843013	0.312609	0.0439751	0.255815	0.330736	0.952625	0.646813	0.947071	0.945735	-0.10105	0.0211866	0.139857	0.0215312	0.000111332	0.00696012	0.0168686	0.24321	0.00696621	0.111532	0.196154	0.062133	0.400805	0.783163	0.624662	0.401797	0.713885	0.558398	0.952173	0.834248	0.964473	0.915453	0.0168062	0.607973	0.826564	0.902517	0.0263578	0.679615	0.986598	0.965283	0.110652	0.852332	0.996347	0.134069	0.000734567	0.0158148
960	2865	RDN25-1	-0.08812	0.362207	0.825111	0.40597	0.325161	0.382448	0.5236	0.978595	0.891056	0.979865	0.968555	0.145935	0.000844695	0.0117402	0.00567736	0.0349199	0.00339494	0.00053308	0.106572	0.267381	0.06863	0.0194574	0.129866	0.0780931	0.390035	0.104893	0.193967	0.101126	0.0503703	0.737733	0.705579	0.718301	0.597513	0.031444	0.337093	0.605114	0.45497	0.800528	0.44114	0.157819	0.738766	0.91496	0.698642	0.386893	0.0180197	0.651421	0.874757
960	2870	RDN25-1	-0.171912	0.0738641	0.526386	0.0734591	0.00787293	0.0821261	0.133365	0.743145	0.313486	0.862179	0.845987	0.0299633	0.49538	0.797663	0.749023	0.171047	0.602127	0.302123	0.939996	0.570618	0.899084	0.74482	-0.13613	0.0646562	0.357498	0.0666918	0.00382956	0.0748638	0.139852	0.656243	0.185185	0.683132	0.752226	-0.0266255	0.416352	0.677935	0.376307	0.00831726	0.440738	0.880439	0.680648	0.0452541	0.698588	0.949879	0.113178	0.00442026	0.0563826
960	2880	RDN25-1	0.0818574	0.39745	0.843013	0.296247	0.385285	0.456462	0.403784	0.952625	0.900978	0.979865	0.9646	0.168732	0.000110556	0.00208098	0.000248784	0.00288519	0.000979709	0.000425757	0.0123359	0.0631858	0.0282955	0.0169446	-0.0847452	0.251418	0.661558	0.475864	0.398818	0.250593	0.297615	0.922066	0.834248	0.815631	0.863281	-0.00491707	0.880708	0.957492	0.624225	0.896683	0.784025	0.960151	0.84386	0.95792	0.908874	0.987971	-0.0118201	0.766971	0.92746
960	2921	RDN25-1	0.151075	0.116857	0.602415	0.0476237	0.28535	0.213138	0.179076	0.706629	0.891056	0.935424	0.886277	0.0416436	0.343258	0.690289	0.0753004	0.935734	0.738992	0.593632	0.437808	0.987197	0.943976	0.891498	-0.0528635	0.474827	0.816752	0.989189	0.300966	0.324489	0.385262	0.996787	0.766773	0.836691	0.890455	0.0147706	0.652112	0.855363	0.122351	0.67948	0.79568	0.986702	0.340251	0.848124	0.916798	0.996347	0.0367212	0.357098	0.719793
960	2922	RDN25-1	0.151075	0.116857	0.602415	0.108685	0.400687	0.309767	0.134708	0.797831	0.903623	0.977591	0.845987	0.0511852	0.243956	0.600019	0.219653	0.868083	0.955923	0.296952	0.668873	0.967482	0.987875	0.74187	-0.0303556	0.681676	0.893161	0.848875	0.289788	0.319087	0.700366	0.989652	0.766283	0.832732	0.932143	-0.00914049	0.780262	0.914542	0.898778	0.184655	0.14666	0.815497	0.963927	0.431737	0.364707	0.922463	0.061308	0.123942	0.446193
960	2923	RDN25-1	0.159425	0.0977496	0.567222	0.111425	0.308075	0.271007	0.0670994	0.804448	0.891056	0.960613	0.788575	0.0112784	0.797506	0.939215	0.762675	0.520117	0.457401	0.452739	0.947055	0.853225	0.838835	0.825564	0.0194029	0.79321	0.930514	0.765352	0.718889	0.714597	0.56692	0.987405	0.931119	0.964473	0.916489	0.00695046	0.832002	0.934549	0.788971	0.411605	0.29707	0.401106	0.928237	0.67942	0.563683	0.658817	0.0505593	0.204681	0.574781
960	2944	RDN25-1	0.0442127	0.648033	0.929331	0.748024	0.593948	0.477285	0.687681	0.995385	0.941893	0.979865	0.981654	0.108336	0.0134443	0.102751	0.0685849	0.910338	0.00596953	0.0320538	0.427112	0.977674	0.10187	0.27432	0.0258122	0.727268	0.910675	0.853976	0.380184	0.493521	0.774833	0.989652	0.823679	0.895638	0.952628	0.0127647	0.696832	0.878215	0.964592	0.0937058	0.300151	0.807539	0.986844	0.272131	0.566664	0.920207	0.101527	0.0107148	0.105498
960	2946	RDN25-1	-0.0234074	0.809093	0.957799	0.922572	0.595445	0.566697	0.722019	0.995385	0.941893	0.98872	0.983652	0.00139163	0.974745	0.998386	0.784922	0.593906	0.498875	0.816354	0.953189	0.884741	0.863163	0.95501	0.0336216	0.64959	0.883145	0.565531	0.996717	0.985026	0.79138	0.94709	0.997698	0.999725	0.956905	0.0562137	0.0859741	0.234765	0.118209	0.675131	0.594098	0.263156	0.331896	0.846894	0.807174	0.524714	0.0339778	0.394177	0.744101
960	2948	RDN25-1	-0.011581	0.904864	0.984468	0.844298	0.967087	0.656348	0.752673	0.995385	0.997597	0.995892	0.986501	0.0277231	0.528182	0.817016	0.725913	0.474034	0.901915	0.883272	0.937082	0.822828	0.983687	0.972334	0.135857	0.0651986	0.359137	0.117478	0.0780137	0.193778	0.139835	0.760271	0.564716	0.790649	0.752226	0.0648996	0.0473834	0.149646	0.207519	0.127459	0.433136	0.252043	0.482192	0.341101	0.690287	0.511878	-0.016041	0.687557	0.893061
960	2959	RDN25-1	-0.11172	0.24745	0.762315	0.481793	0.0509553	0.211609	0.267498	0.99193	0.646813	0.935424	0.943026	0.0578683	0.187662	0.535201	0.071761	0.503577	0.394078	0.244884	0.430566	0.839233	0.804693	0.697511	0.00612602	0.934043	0.979896	0.581048	0.284812	0.906418	0.945311	0.948068	0.763777	0.985113	0.981274	0.0923979	0.00471222	0.0200543	0.00312049	0.907666	0.0516913	0.0179225	0.0192342	0.961058	0.175737	0.0751935	0.0985078	0.013301	0.119551
960	2975	RDN25-1	-0.118462	0.21988	0.742094	0.122342	0.104655	0.164142	0.422528	0.816026	0.757754	0.914659	0.9646	0.296018	5.61915e-12	6.85536e-10	9.88744e-07	4.73545e-05	1.55887e-08	3.34969e-12	0.000129921	0.00355565	2.92623e-06	8.803e-10	0.113656	0.12346	0.496101	0.376068	0.50529	0.249949	0.0542342	0.889191	0.874478	0.815631	0.603102	-0.020588	0.529728	0.772432	0.160683	0.147521	0.270879	0.666131	0.410375	0.37676	0.529272	0.846703	0.0563497	0.157419	0.497637
966	986	RDN25-1	0.193706	0.0435707	0.428423	0.0474166	0.121947	0.0622547	0.0371135	0.706629	0.778651	0.813957	0.677322	0.073012	0.0962835	0.373127	0.121042	0.470065	0.176334	0.0697109	0.530379	0.819419	0.601825	0.403957	0.0624208	0.398623	0.78112	0.372854	0.698892	0.4729	0.318017	0.889191	0.925325	0.887067	0.864274	-0.0111139	0.73445	0.894704	0.984819	0.450803	0.67175	0.898169	0.994649	0.708104	0.851185	0.959122	0.0289677	0.467612	0.789905
966	990	RDN25-1	0.124236	0.19806	0.717723	0.119182	0.0292259	0.148941	0.232604	0.81553	0.577746	0.912294	0.933258	0.0658007	0.134003	0.448584	0.0548893	0.0038433	0.0761045	0.203408	0.397575	0.0721442	0.414943	0.651898	0.0350943	0.635325	0.879381	0.374679	0.0921838	0.466063	0.686335	0.889191	0.575989	0.882431	0.931551	-0.0424742	0.194659	0.424079	0.908512	0.198594	0.615576	0.23801	0.967668	0.447219	0.820352	0.497048	-0.110395	0.00550203	0.0654284
966	1004	RDN25-1	0.0678046	0.483586	0.884788	0.83238	0.272029	0.767514	0.928956	0.995385	0.891056	0.997721	0.995705	0.0209042	0.634363	0.875405	0.199371	0.240605	0.736238	0.440778	0.645354	0.649131	0.943634	0.821621	0.11205	0.128887	0.505733	0.782207	0.0594522	0.344402	0.495087	0.989652	0.53998	0.836691	0.901827	-0.0136507	0.676938	0.870982	0.0199774	0.484241	0.195724	0.0619979	0.0921063	0.736024	0.43855	0.196539	-0.0507962	0.202565	0.571275
966	1042	RDN25-1	-0.0710287	0.462985	0.874971	0.363387	0.649245	0.157133	0.192005	0.965316	0.947996	0.914659	0.903663	0.105986	0.0156123	0.112837	0.123404	0.0357737	0.508219	0.363778	0.534375	0.268609	0.867453	0.787075	0.0795069	0.282023	0.69379	0.491516	0.240855	0.936676	0.819423	0.927948	0.741827	0.988746	0.963473	-0.0172751	0.597996	0.822807	0.359741	0.929528	0.0223678	0.0419732	0.668598	0.972322	0.0924817	0.147074	-0.0219751	0.581647	0.845146
966	1052	RDN25-1	-0.134602	0.162883	0.656572	0.149883	0.3923	0.0905417	0.136283	0.849015	0.903406	0.88126	0.847453	0.0470155	0.284561	0.635129	0.545449	0.141061	0.848002	0.531693	0.884225	0.519297	0.96464	0.865914	0.0371017	0.616097	0.875329	0.782014	0.355646	0.996247	0.791209	0.989652	0.80851	0.999972	0.956905	-0.0333682	0.308347	0.575139	0.281973	0.857305	0.0741945	0.200972	0.581197	0.943071	0.231297	0.449875	-0.0429135	0.281778	0.654948
966	1056	RDN25-1	-0.074172	0.443374	0.868663	0.349716	0.767168	0.409533	0.284535	0.962515	0.97722	0.979865	0.943026	0.0670826	0.126572	0.437032	0.412244	0.0733473	0.251117	0.508665	0.820677	0.393381	0.680362	0.860037	-0.0713103	0.334755	0.736017	0.247151	0.736777	0.303748	0.177606	0.851795	0.936744	0.823258	0.788236	-0.0898367	0.00600667	0.0248721	0.0110449	0.368795	0.0117397	0.00131733	0.0568024	0.640154	0.0542852	0.0079585	-0.0422737	0.289021	0.661135
966	1110	RDN25-1	-0.112894	0.242485	0.761437	0.387622	0.839852	0.857723	0.800177	0.975792	0.991692	0.997721	0.98932	-0.0334383	0.446724	0.774592	0.851967	0.342151	0.216704	0.270997	0.96959	0.744831	0.653274	0.721562	0.0211847	0.774708	0.924586	0.58495	0.193428	0.141797	0.166878	0.948955	0.705579	0.752214	0.788236	-0.0775736	0.0177324	0.0653362	0.222488	0.795195	0.662375	0.799352	0.507907	0.911462	0.847873	0.918384	-0.091275	0.0218455	0.159769
966	1124	RDN25-1	0.0689797	0.476022	0.878474	0.588027	0.900449	0.625372	0.972071	0.99316	0.997597	0.995892	0.995705	0.115493	0.00838556	0.0730597	0.054768	0.584903	0.0522654	0.304757	0.397575	0.882211	0.336063	0.749228	0.128217	0.0819817	0.399479	0.154573	0.593103	0.16557	0.420471	0.790216	0.887706	0.778705	0.90041	-0.0265727	0.417277	0.678435	0.377926	0.0399891	0.248709	0.0177136	0.680648	0.150851	0.505015	0.0746497	0.082426	0.0384584	0.227028
966	1133	RDN25-1	0.131156	0.174018	0.673796	0.312409	0.0988163	0.760252	0.290387	0.952625	0.757111	0.997721	0.943026	-0.0663318	0.130885	0.444871	0.0833635	0.744867	0.000802677	0.0652767	0.461808	0.93594	0.0245283	0.394508	0.0703257	0.341488	0.741016	0.592372	0.177135	0.701783	0.55727	0.952173	0.703226	0.964131	0.915453	-0.0535648	0.10184	0.270097	0.0711813	0.894014	0.000100819	0.0449608	0.23847	0.956624	0.000757006	0.155265	-0.0464997	0.243464	0.618342
966	1437	RDN25-1	0.252077	0.00818686	0.191679	0.0460518	0.04771	0.100516	0.100318	0.706629	0.646813	0.896011	0.790816	0.027011	0.538835	0.82363	0.670725	0.786516	0.207785	0.198394	0.922204	0.947704	0.641089	0.646389	0.206137	0.00487672	0.0885639	0.051162	0.0561135	0.131665	0.13102	0.64174	0.537793	0.736155	0.75067	0.0332626	0.30988	0.576914	0.709029	0.846354	0.154138	0.142101	0.889912	0.936907	0.377697	0.362972	0.0435492	0.274705	0.649045
966	1449	RDN25-1	0.0516909	0.593477	0.911096	0.951059	0.927093	0.99711	0.604129	0.996965	0.997597	0.999984	0.978758	0.0651574	0.137857	0.455704	0.89469	0.952783	0.79215	0.424544	0.97893	0.991533	0.957145	0.81083	0.197795	0.00695924	0.100543	0.0813813	0.109261	0.0608546	0.223008	0.689521	0.611568	0.642272	0.836791	0.0496845	0.129183	0.322613	0.85031	0.822827	0.952158	0.158168	0.952395	0.928818	0.981693	0.387387	0.0615516	0.122453	0.443837
966	1450	RDN25-1	-0.201041	0.0360657	0.399027	0.0351699	0.102793	0.0277829	0.00851268	0.664938	0.757754	0.602089	0.366743	0.0764125	0.081714	0.338148	0.256608	0.0889411	0.265036	0.800101	0.700299	0.422671	0.69933	0.949393	0.156322	0.0335965	0.252664	0.0818637	0.032753	0.0841996	0.234772	0.689521	0.435914	0.700438	0.839759	0.00807173	0.805406	0.923444	0.866961	0.504167	0.745156	0.149079	0.957682	0.751105	0.890891	0.374192	-0.0274323	0.491544	0.805145
[truncated: 2,424 more rows]
[truncated: 316 more columns]

## Sheet: B
Supplementary file 1B. Fraction modified by position for every experiment with associated wild type to experiment two sample chi squared test p-values and Benjamini-Hochberg corrected p-values
[truncated: 111 more rows]
[truncated: 51 more columns]

[truncated: 5 more sheets: C, D, E, F, G]
